# Supplementary material for: circCELSR1 (hsa_circ_0063809) Contributes to Paclitaxel Resistance of Ovarian Cancer Cells by Regulating FOXR2 Expression via miR-1252
Source: PubMed Central journal article supplement — Mol Ther Nucleic Acids. 2019 Dec 18;19:718–30. doi: 10.1016/j.omtn.2019.12.005 (PMC6965731; doi:10.1016/j.omtn.2019.12.005), 2019-12-18
Supplement: mmc1.pdf [file mmc1.pdf]

OMTN, Volume 19

## **Supplemental Information**

### **circCELSR1 (hsa\_circ\_0063809) Contributes to Paclitaxel Resistance of Ovarian Cancer Cells by Regulating FOXR2 Expression via miR-1252**

**Shu Zhang, Jie Cheng, Chenlian Quan, Hao Wen, Zheng Feng, Qin Hu, Jun Zhu, Yan Huang, and Xiaohua Wu**

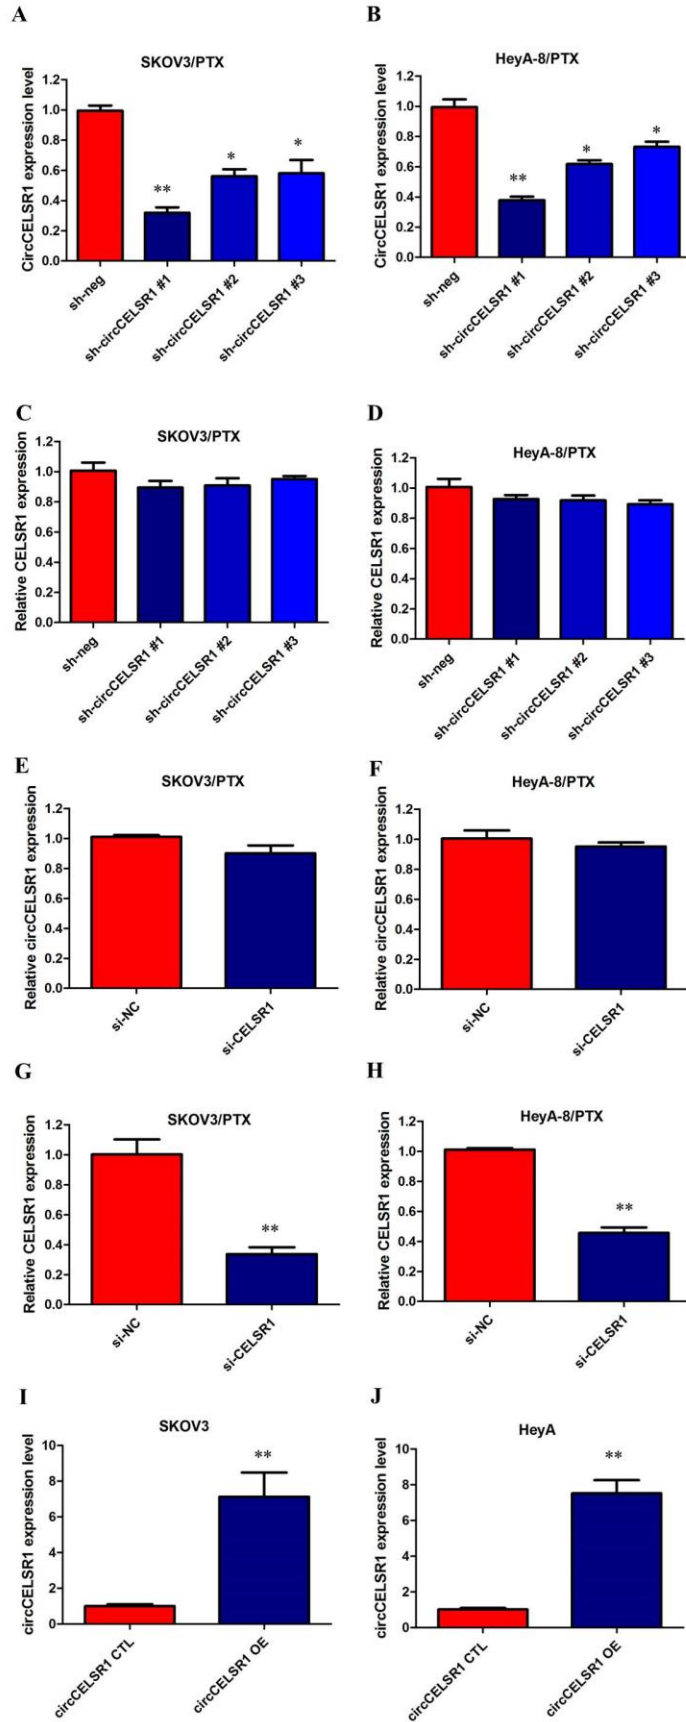

**Figure S1 (A)** The qRT-PCR analysis confirmed that circCELSR1

expression level was significantly downregulated in SKOV3/PTX cells by sh-circCELSR1; (B) The qRT-PCR analysis confirmed that circCELSR1 expression level was significantly downregulated in HeyA-8/PTX cells by sh-circCELSR1; (C) The qRT-PCR assay indicated the expression level of CELSR1 in SKOV3/PTX cells treated with sh-circCELSR1; (D) The qRT-PCR assay indicated the expression level of CELSR1 in HeyA-8/PTX cells treated with sh-circCELSR1; (E) The qRT-PCR assay indicated the expression level of circCELSR1 in SKOV3/PTX cells treated with si-CELSR1; (F) The qRT-PCR assay indicated the expression level of circCELSR1 in HeyA-8/PTX cells treated with si-CELSR1; (G) The qRT-PCR assay indicated the expression level of CELSR1 in SKOV3/PTX cells treated with si-CELSR1; (H) The qRT-PCR assay indicated the expression level of CELSR1 in HeyA-8/PTX cells treated with si-CELSR1; (I) The qRT-PCR assay indicated the relative abundance of circCELSR1 in SKOV3 cells infected with circCELSR1 overexpressing adenovirus (circCELSR1 OE) or control GFP adenovirus (circCELSR1 CTL); (J) The qRT-PCR assay indicated the relative abundance of circCELSR1 in HeyA-8 cells infected with circCELSR1 overexpressing adenovirus (circCELSR1 OE) or control GFP adenovirus (circCELSR1 CTL); All tests were at least performed three times. Data were expressed as mean  $\pm$  SD. \*\*\*P < 0.001;\*\*P < 0.01;

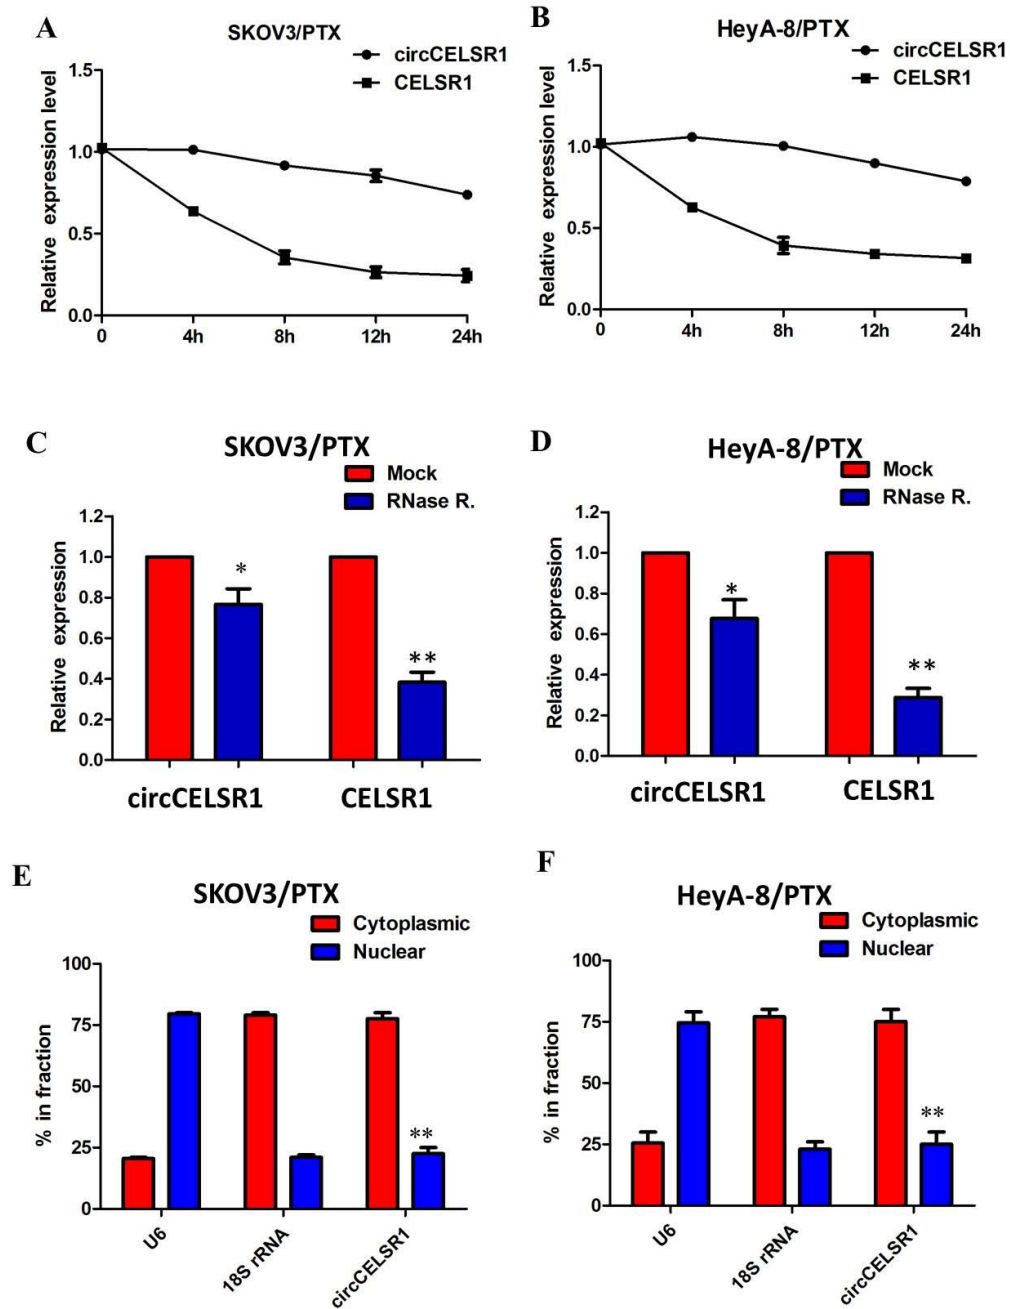

**Figure S2** (A) The qRT-PCR for the abundance of circCELSR1 and CELSR1 in SKOV3/PTX cells treated with Actinomycin D at the indicated time point; (B) The qRT-PCR for the abundance of circCELSR1 and CELSR1 in HeyA-8/PTX cells treated with Actinomycin D at the indicated time point; (C) circCELSR1 was resistant to RNase R digestion in SKOV3/PTX cells. (D) circCELSR1 was resistant to RNase R

digestion in HeyA-8/PTX cells. (E) Levels of circCELSR1 in the nuclear and cytoplasmic fractions of SKOV3/PTX cells; (F) Levels of circCELSR1 in the nuclear and cytoplasmic fractions of HeyA-8/PTX cells. Data are the means  $\pm$ SD of three experiments, \* $P$ <0.05, \*\* $P$ <0.01;

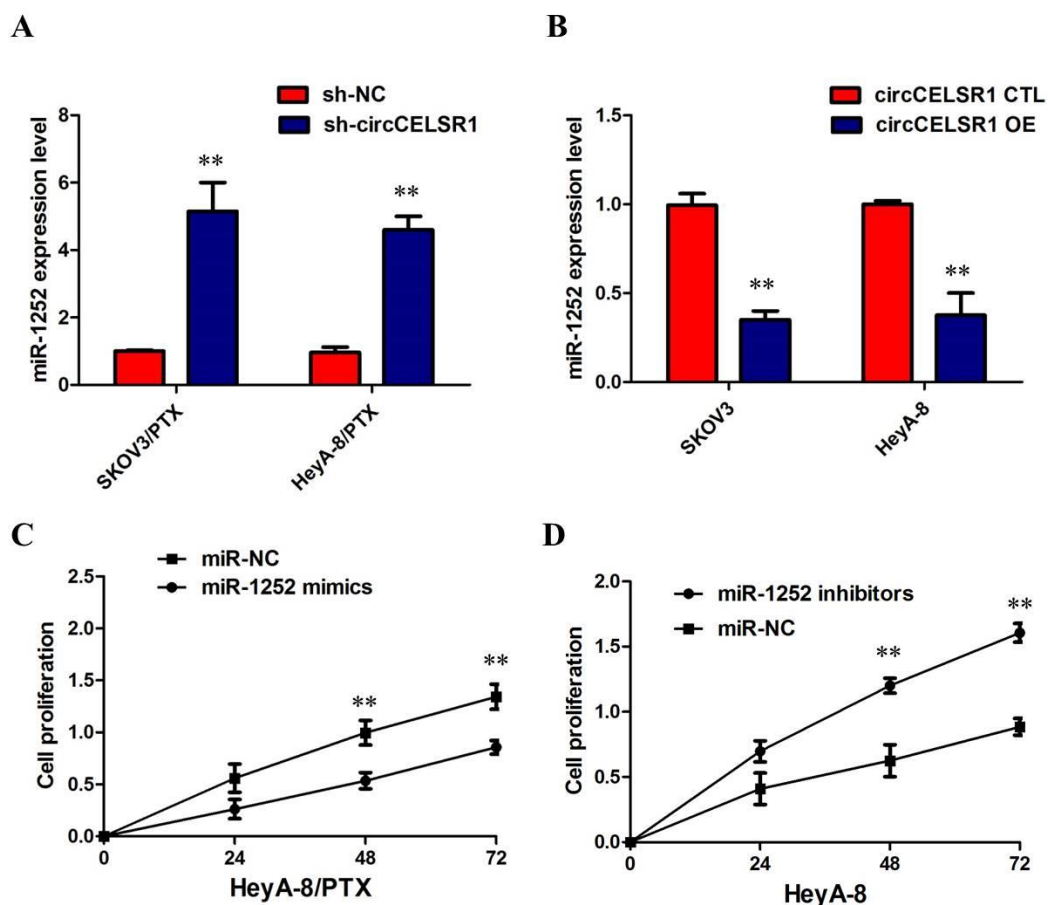

**Figure S3** (A) Inhibition of circCELSR1 increased the expression level of miR-1252 in SKOV3/PTX and HeyA-8/PTX cells; (B) Overexpression of circCELSR1 decreased the expression level of miR-1252 in SKOV3 and HeyA-8 cells; (C) CCK-8 assay showed that miR-1252 overexpression could dramatically inhibit the proliferation of HeyA-8/PTX cells; (D) CCK-8 assay showed that inhibition of miR-1252

could dramatically promote the proliferation of HeyA-8 cells; All tests were at least performed three times. Data were expressed as mean  $\pm$  SD.

\*\*\*P < 0.001; \*\*P < 0.01;

## CircRNA

## CircRNA (Top) - miRNA (Bottom) pairing

## Mirbase ID

|                                              |                                 |
|----------------------------------------------|---------------------------------|
| <a href="#">hsa_circ_0063809 (5' ... 3')</a> | CGGCACGGCACAGCUGCUCCGGC<br><br> |
| <a href="#">hsa-miR-1203 (3' ... 5')</a>     | CUCGACGUAGGACCGAGGCC            |
| <a href="#">hsa_circ_0063809 (5' ... 3')</a> | GCCUACCAGCUGCUGGGCCACGU<br><br> |
| <a href="#">hsa-miR-1204 (3' ... 5')</a>     | UAUUACCUCUGUCCGGUGCU            |
| <a href="#">hsa_circ_0063809 (5' ... 3')</a> | GGACGGCGCCAGGGCCUGCAGC<br><br>  |
| <a href="#">hsa-miR-1205 (3' ... 5')</a>     | GAGUUUCGUUUGGACGUCU             |
| <a href="#">hsa_circ_0063809 (5' ... 3')</a> | GGCUACUUCAGCAACGUGGCACG<br><br> |
| <a href="#">hsa-miR-1227 (3' ... 5')</a>     | GACCCUUUCCACCGUGC               |

|                                                                                                     |                                                                          |
|-----------------------------------------------------------------------------------------------------|--------------------------------------------------------------------------|
| <p><a href="#">hsa_circ_0063809 (5' ... 3')</a></p> <p><a href="#">hsa-miR-1252 (3' ... 5')</a></p> | <p>AGCUGCUGGGCCACGUCCUUCAG</p> <p>     </p> <p>AUUUACUUAAGUUAAGGAAGA</p> |
| <p><a href="#">hsa_circ_0063809 (5' ... 3')</a></p> <p><a href="#">hsa-miR-1276 (3' ... 5')</a></p> | <p>ACAGCACACGGGCACGCUCUUUG</p> <p>     </p> <p>ACAGAGGUGUCCCGAGAAAU</p>  |
| <p><a href="#">hsa_circ_0063809 (5' ... 3')</a></p> <p><a href="#">hsa-miR-1287 (3' ... 5')</a></p> | <p>GCGGCGUGGGAGCAGAUCACGG</p> <p>     </p> <p>CUGAGCUUGGUGACUAGGUCGU</p> |
| <p><a href="#">hsa_circ_0063809 (5' ... 3')</a></p> <p><a href="#">hsa-miR-1295 (3' ... 5')</a></p> | <p>GCAAUGACGUGCGCACGGCCUAC</p> <p>     </p> <p>AGUGGGUCUAGACCCGGAUU</p>  |
| <p><a href="#">hsa_circ_0063809 (5' ... 3')</a></p>                                                 | <p>AGUUCAACUUUACGGGAGCCAGG</p> <p>     </p>                              |



|                                              |                             |
|----------------------------------------------|-----------------------------|
| <a href="#">hsa-miR-149 (3' ... 5')</a>      | CCUCACUUCUGUGCCUCGGUCU      |
| <a href="#">hsa_circ_0063809 (5' ... 3')</a> | CAGCACGAGAGCUGGCAGCAGGG<br> |
| <a href="#">hsa-miR-370 (3' ... 5')</a>      | UGGUCCAAGGUGGGGUCGUCCG      |
| <a href="#">hsa_circ_0063809 (5' ... 3')</a> | CCGCGAUUCGACACCAUCCAUGA<br> |
| <a href="#">hsa-miR-490-5p (3' ... 5')</a>   | UGGGUGGACCUCUAGGUACC        |
| <a href="#">hsa_circ_0063809 (5' ... 3')</a> | AGCCACCAGGGCGGCGUGGGAGC<br> |
| <a href="#">hsa-miR-532-3p (3' ... 5')</a>   | ACGUUCGGAACCCACACCCUCC      |
| <a href="#">hsa_circ_0063809 (5' ... 3')</a> | AUCUUUGACAAGUUCAACUUUAC<br> |
| <a href="#">hsa-miR-561 (3' ... 5')</a>      | UGAAGUCCUAGAAUUUGAAAC       |
| <a href="#">hsa_circ_0063809 (5' ... 3')</a> | UCCGGCGCCUCGAGGGCUACUUC<br> |

|                                              |                             |
|----------------------------------------------|-----------------------------|
| <a href="#">hsa-miR-562 (3' ... 5')</a>      | CGUUUACCAUGUCGAUGAAA        |
| <a href="#">hsa_circ_0063809 (5' ... 3')</a> | GAGACGCAGGUGGACGGCGCCAG<br> |
| <a href="#">hsa-miR-566 (3' ... 5')</a>      | CAACCCUAGUGUCCGCGGG         |
| <a href="#">hsa_circ_0063809 (5' ... 3')</a> | GCACGCUCUUUGGCAAUGACGUG<br> |
| <a href="#">hsa-miR-598 (3' ... 5')</a>      | ACUGCUACUGUUGCUACUGCAU      |
| <a href="#">hsa_circ_0063809 (5' ... 3')</a> | CAGGGCUUCGACCUGGCAGCCAC<br> |
| <a href="#">hsa-miR-604 (3' ... 5')</a>      | CAGGACUUAAGGCGUCGGA         |
| <a href="#">hsa_circ_0063809 (5' ... 3')</a> | GGGCACGCUCUUUGGCAAUGACG<br> |
| <a href="#">hsa-miR-616 (3' ... 5')</a>      | GACGAGUUUGGAGGUUACUGA       |
| <a href="#">hsa_circ_0063809 (5' ... 3')</a> | UGCACGCGCCUACCAGCUGCUG<br>  |

|                                              |                                |
|----------------------------------------------|--------------------------------|
| <a href="#">hsa-miR-646 (3' ... 5')</a>      | CGGAGUCUCCGUCGACGAA            |
| <a href="#">hsa_circ_0063809 (5' ... 3')</a> | AGGGCGGCACGGCACAGCUGCUC<br>    |
| <a href="#">hsa-miR-646 (3' ... 5')</a>      | CGGAGUCUCCGUCGACGAA            |
| <a href="#">hsa_circ_0063809 (5' ... 3')</a> | CAGGGCUUCGACCUGGCAGCCAC<br>    |
| <a href="#">hsa-miR-647 (3' ... 5')</a>      | CUUCCUUCACUCACGUCGGUG          |
| <a href="#">hsa_circ_0063809 (5' ... 3')</a> | CAGCCACCAGGGCGG---CGUGGGAG<br> |
| <a href="#">hsa-miR-662 (3' ... 5')</a>      | GACGACCCGGUGUUGCACCCU          |
| <a href="#">hsa_circ_0063809 (5' ... 3')</a> | GGCCUACCAGCUGCUGGGCCACG<br>    |
| <a href="#">hsa-miR-663b (3' ... 5')</a>     | GGAGUCCGUGCCGCCCGGUGG          |
| <a href="#">hsa_circ_0063809 (5' ... 3')</a> | CACUCGGGCAGCGCCUCCUGGC<br>     |

|                                              |                             |
|----------------------------------------------|-----------------------------|
| <a href="#">hsa-miR-665 (3' ... 5')</a>      | UCCCCGGAGUCGGAGGACCA        |
| <a href="#">hsa_circ_0063809 (5' ... 3')</a> | AGAGUUCCCCAGGGAGCUGGAGU<br> |
| <a href="#">hsa-miR-766 (3' ... 5')</a>      | CGACUCCGACACCCCGACCUCA      |
| <a href="#">hsa_circ_0063809 (5' ... 3')</a> | ACCAGGGCGGCGUGGGAGCAGAU<br> |
| <a href="#">hsa-miR-767-3p (3' ... 5')</a>   | UCUUUGGUACCCCAUACUCGUCU     |
| <a href="#">hsa_circ_0063809 (5' ... 3')</a> | UCUUUGGCAAUGACGUGCGCACG<br> |
| <a href="#">hsa-miR-933 (3' ... 5')</a>      | CCCUCUCCAGAGGGACGCGUGU      |

## miRNA predictions

| Site Type | CircRN A Start | CircRN A End | 3' pairing | local AU | position | TA     | SPS    | context + score |
|-----------|----------------|--------------|------------|----------|----------|--------|--------|-----------------|
| 7mer-m8   | 303            | 309          | -0.016     | 0.091    | -0.029   | -0.066 | -0.101 | -0.241          |
| 7mer-m8   | 136            | 142          | 0.003      | 0.074    | -0.043   | -0.057 | -0.099 | -0.242          |
| 7mer-m8   | 48             | 54           | 0.003      | 0.129    | -0.055   | 0.028  | -0.064 | -0.079          |
| 7mer-m8   | 334            | 340          | 0.012      | 0.086    | -0.034   | 0.001  | -0.071 | -0.126          |

|         |     |     |       |       |        |       |        |        |
|---------|-----|-----|-------|-------|--------|-------|--------|--------|
| 7mer-1a | 143 | 149 | 0.008 | 0.072 | -0.034 | 0.026 | -0.017 | -0.019 |
| 7mer-m8 | 96  | 102 | 0.003 | 0.106 | -0.048 | 0.012 | 0.018  | -0.029 |
| 7mer-m8 | 271 | 277 | 0.012 | 0.133 | -0.025 | 0     | -0.038 | -0.038 |
| 7mer-m8 | 119 | 125 | 0.021 | 0.076 | -0.045 | -0.06 | -0.068 | -0.196 |
| 7mer-m8 | 434 | 440 | 0.003 | 0.081 | -0.048 | 0.016 | -0.069 | -0.137 |

|         |     |     |       |       |        |        |        |        |
|---------|-----|-----|-------|-------|--------|--------|--------|--------|
|         |     |     |       |       |        |        |        |        |
| 7mer-m8 | 163 | 169 | 0.021 | 0.111 | -0.039 | 0.02   | -0.064 | -0.071 |
| 8mer-1a | 460 | 467 | 0.003 | 0.101 | -0.096 | -0.012 | 0.014  | -0.237 |
| 7mer-m8 | 261 | 267 | 0.003 | 0.134 | -0.025 | 0.023  | -0.069 | -0.054 |
| 7mer-1a | 424 | 430 | 0.001 | 0.035 | -0.038 | 0.031  | 0.082  | 0.037  |
| 7mer-m8 | 320 | 326 | 0.021 | 0.115 | -0.032 | -0.009 | 0.012  | -0.013 |

|         |     |     |       |       |        |        |        |        |
|---------|-----|-----|-------|-------|--------|--------|--------|--------|
|         |     |     |       |       |        |        |        |        |
| 7mer-1a | 37  | 43  | 0.001 | 0.067 | -0.046 | -0.055 | -0.127 | -0.234 |
| 7mer-m8 | 107 | 113 | 0.012 | 0.085 | -0.047 | -0.089 | 0.014  | -0.145 |
| 7mer-1a | 181 | 187 | 0.001 | 0.059 | -0.03  | -0.002 | -0.104 | -0.15  |
| 7mer-m8 | 105 | 111 | 0.012 | 0.099 | -0.047 | -0.004 | 0.029  | -0.031 |
| 7mer-m8 | 128 | 134 | 0.012 | 0.125 | -0.044 | 0.011  | -0.047 | -0.063 |



|         |     |     |        |       |        |       |        |        |
|---------|-----|-----|--------|-------|--------|-------|--------|--------|
|         |     |     |        |       |        |       |        |        |
| 7mer-m8 | 299 | 305 | 0.003  | 0.144 | -0.029 | 0.011 | -0.047 | -0.038 |
| 7mer-m8 | 181 | 187 | 0.021  | 0.11  | -0.036 | 0.01  | -0.084 | -0.099 |
| 7mer-1a | 260 | 266 | -0.009 | 0.085 | -0.022 | -0.05 | -0.079 | -0.149 |
| 7mer-m8 | 135 | 141 | 0.003  | 0.051 | -0.043 | 0.004 | -0.119 | -0.224 |
| 7mer-m8 | 235 | 241 | -0.016 | 0.161 | -0.029 | 0.033 | -0.066 | -0.037 |

|         |     |     |       |       |        |        |        |        |
|---------|-----|-----|-------|-------|--------|--------|--------|--------|
|         |     |     |       |       |        |        |        |        |
| 7mer-m8 | 483 | 489 | 0.012 | 0.048 | -0.055 | 0.031  | -0.069 | -0.153 |
| 7mer-1a | 265 | 271 | 0.001 | 0.073 | -0.021 | 0.011  | -0.052 | -0.062 |
| 7mer-m8 | 113 | 119 | 0.003 | 0.107 | -0.046 | -0.087 | -0.067 | -0.21  |

**context  
+ score  
percent  
ile**

75

78

71

78

76

81

46

83

80

|    |
|----|
|    |
| 64 |
| 97 |
| 68 |
| 83 |
| 70 |

|    |
|----|
|    |
| 82 |
| 68 |
| 73 |
| 74 |
| 58 |

|    |
|----|
|    |
| 48 |
| 62 |
| 63 |
| 89 |
| 63 |

|    |
|----|
|    |
| 88 |
| 65 |
| 73 |



| Target gene | Representative transcript |
|-------------|---------------------------|
| POU2AF1     | ENST00000393067.3         |
| LPP         | ENST00000312675.4         |
| B4GALT4     | ENST00000467604.1         |
| CYP3A5      | ENST00000339843.2         |
| CSRNP3      | ENST00000314499.7         |
| C9orf152    | ENST00000400613.4         |
| LPAR6       | ENST00000378434.4         |
| SPTSSB      | ENST00000359175.4         |
| CAMK4       | ENST00000282356.4         |
| AMMECR1     | ENST00000262844.5         |
| SAMD12      | ENST00000409003.4         |
| XKR4        | ENST00000327381.6         |
| KCNJ6       | ENST00000609713.1         |
| PLEKHS1     | ENST00000354462.3         |
| ACKR2       | ENST00000442925.1         |
| PTPRT       | ENST00000373187.1         |
| RPL7A       | ENST00000323345.6         |
| GSTO1       | ENST00000539281.1         |
| CD209       | ENST00000301357.8         |
| EHD2        | ENST00000263277.3         |
| EIF4EBP2    | ENST00000373218.4         |
| ADIPOQ      | ENST00000412955.2         |
| GNB1        | ENST00000378609.4         |
| FTH1        | ENST00000273550.7         |
| EFCAB6      | ENST00000356087.4         |
| DAOA        | ENST00000329625.5         |
| PGRMC2      | ENST00000296425.5         |
| AAK1        | ENST00000409085.4         |
| GSG1L       | ENST00000380898.2         |
| MTMR1       | ENST00000445323.2         |
| CBL         | ENST00000264033.4         |
| ZNF544      | ENST00000599227.1         |
| FAM83F      | ENST00000333407.6         |
| C1orf143    | ENST00000443836.1         |
| PRR4        | ENST00000228811.4         |
| PARP11      | ENST00000427057.2         |
| SSR4        | ENST00000370086.3         |
| VPS13B      | ENST00000395996.1         |
| PLCXD3      | ENST00000377801.3         |
| PTER        | ENST00000378000.1         |
| DCP1B       | ENST00000280665.6         |
| SOX4        | ENST00000244745.1         |
| YWHAQ       | ENST00000381844.4         |
| TPM4        | ENST00000300933.4         |
| MPL         | ENST00000372470.3         |
| DDAH1       | ENST00000535924.2         |
| HEBP1       | ENST00000014930.4         |
| TMEM14E     | ENST00000408960.3         |
| RUSC1       | ENST00000368352.5         |
| RTKN2       | ENST00000373789.3         |
| PNMA2       | ENST00000522362.2         |
| PPP1R1A     | ENST00000257905.8         |
| GREB1L      | ENST00000580732.2         |

|               |                   |
|---------------|-------------------|
| SIX2          | ENST00000303077.6 |
| OPCML         | ENST00000331898.7 |
| SNX27         | ENST00000368843.3 |
| SLC39A9       | ENST00000031146.4 |
| C10orf40      | ENST00000521074.1 |
| AF165138.7    | ENST00000400562.1 |
| DKFZP779L1853 | ENST00000595310.1 |
| BSCCL2        | ENST00000278893.7 |
| PQLC3         | ENST00000402361.1 |
| SPRY3         | ENST00000302805.2 |
| SEC23A        | ENST00000537403.1 |
| CNGA3         | ENST00000272602.2 |
| GLRX          | ENST00000379979.4 |
| SELL          | ENST00000236147.4 |
| C11orf87      | ENST00000327419.6 |
| DLGAP5        | ENST00000395425.2 |
| CSTA          | ENST00000264474.3 |
| AK4           | ENST00000545314.1 |
| REL           | ENST00000295025.8 |
| TAT           | ENST00000355962.4 |
| KCNN3         | ENST00000271915.4 |
| UBQLN2        | ENST00000338222.5 |
| FGL2          | ENST00000248598.5 |
| SAMD13        | ENST00000370667.3 |
| DUSP10        | ENST00000366899.3 |
| CD4           | ENST00000011653.4 |
| PTP4A1        | ENST00000370651.3 |
| MRPS6         | ENST00000399312.2 |
| NSDHL         | ENST00000370274.3 |
| DCX           | ENST00000356915.2 |
| NBL1          | ENST00000375136.3 |
| HTR2C         | ENST00000371950.3 |
| ASAH2B        | ENST00000374007.1 |
| HSD3B1        | ENST00000235547.6 |
| MINOS1-NBL1   | ENST00000602662.1 |
| SYPL2         | ENST00000369872.3 |
| AKAP5         | ENST00000394718.4 |
| SPRR1A        | ENST00000307122.2 |
| RNF125        | ENST00000217740.3 |
| GPR111        | ENST00000398742.2 |
| IGFBP4        | ENST00000269593.4 |
| ONECUT2       | ENST00000491143.2 |
| HAND1         | ENST00000231121.2 |
| SUN1          | ENST00000456758.2 |
| KRTAP3-3      | ENST00000391586.1 |
| MAP3K9        | ENST00000554752.2 |
| ERP27         | ENST00000266397.2 |
| TMEM178B      | ENST00000565468.1 |
| FCAR          | ENST00000355524.3 |
| PRKAR2A       | ENST00000265563.8 |
| MS4A4A        | ENST00000337908.4 |
| GABRB2        | ENST00000393959.1 |
| HSD3B2        | ENST00000543831.1 |
| GRIN2B        | ENST00000609686.1 |

|              |                   |
|--------------|-------------------|
| PPP1R12B     | ENST00000608999.1 |
| UCP2         | ENST00000536983.1 |
| BTBD19       | ENST00000453418.1 |
| TRDMT1       | ENST00000377799.3 |
| TCHHL1       | ENST00000368806.1 |
| EIF4H        | ENST00000265753.8 |
| SULT1C4      | ENST00000272452.2 |
| BAALC        | ENST00000438105.2 |
| NRSN1        | ENST00000378491.4 |
| KIAA1737     | ENST00000361786.2 |
| OLAH         | ENST00000378228.3 |
| IL2RG        | ENST00000374202.2 |
| BATF3        | ENST00000243440.1 |
| TRIM58       | ENST00000366481.3 |
| GAPT         | ENST00000396776.2 |
| SMIM11       | ENST00000399299.1 |
| TPRX1        | ENST00000322175.3 |
| DGKH         | ENST00000261491.5 |
| NEUROD4      | ENST00000242994.3 |
| KSR2         | ENST00000425217.1 |
| RSP04        | ENST00000217260.4 |
| ZMAT1        | ENST00000372782.3 |
| HSPH1        | ENST00000320027.5 |
| TMUB2        | ENST00000590235.1 |
| CLTA         | ENST00000433436.2 |
| UBE2G2       | ENST00000345496.2 |
| WAC          | ENST00000375664.4 |
| CD1A         | ENST00000289429.5 |
| TFRC         | ENST00000540528.1 |
| CD3D         | ENST00000300692.4 |
| PHF6         | ENST00000332070.3 |
| ZNF391       | ENST00000244576.4 |
| BSG          | ENST00000346916.4 |
| AL031663.2   | ENST00000595203.1 |
| CDC16        | ENST00000252458.6 |
| TRAPPC3L     | ENST00000356128.4 |
| CTB-129P6.11 | ENST00000591646.1 |
| APOL6        | ENST00000409652.4 |
| C6orf164     | ENST00000369570.4 |
| NBPF8        | ENST00000369190.5 |
| PDK3         | ENST00000441463.2 |
| RNF150       | ENST00000515673.2 |
| NCBP2        | ENST00000447325.1 |
| SPRY1        | ENST00000394339.2 |
| ZNF25        | ENST00000302609.7 |
| BTG2         | ENST00000290551.4 |
| TKTL1        | ENST00000369915.3 |
| PXT1         | ENST00000454782.2 |
| ITGAV        | ENST00000261023.3 |
| C11orf82     | ENST00000528759.1 |
| FOXF1        | ENST00000262426.4 |
| RP11-67H2.1  | ENST00000521500.2 |
| ZBTB37       | ENST00000367701.5 |
| STARD4       | ENST00000512160.1 |

|            |                   |
|------------|-------------------|
| MMS22L     | ENST00000275053.4 |
| GSX1       | ENST00000302945.2 |
| ESRRG      | ENST00000361525.3 |
| ZNF280D    | ENST00000558320.1 |
| SUGT1      | ENST00000310528.8 |
| TSPYL4     | ENST00000420283.1 |
| CORO2B     | ENST00000261861.5 |
| IL26       | ENST00000229134.4 |
| GCLM       | ENST00000370238.3 |
| ITGBL1     | ENST00000545560.2 |
| MEIG1      | ENST00000407572.1 |
| PPT1       | ENST00000433473.3 |
| SERPINB8   | ENST00000397985.2 |
| FAM195B    | ENST00000576679.1 |
| HS6ST3     | ENST00000376705.2 |
| AC132872.2 | ENST00000598222.1 |
| E2F7       | ENST00000416496.2 |
| PARP2      | ENST00000527915.1 |
| KRTAP9-6   | ENST00000391355.1 |
| ZNF33A     | ENST00000469037.2 |
| KBTBD4     | ENST00000526005.1 |
| PALM2      | ENST00000448454.2 |
| TMPRSS12   | ENST00000551456.1 |
| ARCN1      | ENST00000359415.4 |
| RNF181     | ENST00000441634.1 |
| KMO        | ENST00000366559.4 |
| UBN2       | ENST00000473989.3 |
| LPXN       | ENST00000395074.2 |
| ZFP3       | ENST00000318833.3 |
| FGD6       | ENST00000343958.4 |
| EBAG9      | ENST00000337573.5 |
| AMT        | ENST00000458307.2 |
| BFSP2      | ENST00000302334.2 |
| ITIH6      | ENST00000218436.6 |
| NFE2       | ENST00000312156.4 |
| VIL1       | ENST00000248444.5 |
| TAF6       | ENST00000453269.2 |
| BAG6       | ENST00000375976.4 |
| SLC22A15   | ENST00000369503.4 |
| BEST2      | ENST00000553030.1 |
| CA10       | ENST00000570565.1 |
| APOLD1     | ENST00000356591.4 |
| ARRDC4     | ENST00000268042.6 |
| SLC4A8     | ENST00000453097.2 |
| TMEM33     | ENST00000504986.1 |
| DSCR3      | ENST00000309117.6 |
| KDM5A      | ENST00000399788.2 |
| RSU1       | ENST00000377921.3 |
| C1QTNF7    | ENST00000429690.1 |
| ZBED3      | ENST00000255198.2 |
| AP000695.1 | ENST00000595927.1 |
| CCDC60     | ENST00000327554.2 |
| ELP4       | ENST00000395934.2 |
| SOX7       | ENST00000554914.1 |

|              |                   |
|--------------|-------------------|
| CDC42EP2     | ENST00000279249.2 |
| LAMTOR1      | ENST00000538404.1 |
| CYB5R4       | ENST00000369681.5 |
| OPA3         | ENST00000263275.4 |
| TMEM138      | ENST00000278826.6 |
| RTTN         | ENST00000454359.1 |
| AC006455.1   | ENST00000456890.1 |
| PRR15L       | ENST00000300557.2 |
| PPP1R8       | ENST00000311772.5 |
| APEX1        | ENST00000557054.1 |
| TTI2         | ENST00000360742.5 |
| TAL2         | ENST00000334077.3 |
| ARHGEF6      | ENST00000370620.1 |
| ZNF660       | ENST00000322734.2 |
| ITGAE        | ENST00000263087.4 |
| SCP2         | ENST00000488965.1 |
| INTU         | ENST00000335251.6 |
| LMBRD2       | ENST00000296603.4 |
| CEP250       | ENST00000397527.1 |
| SNX6         | ENST00000396526.3 |
| SMIM3        | ENST00000526627.1 |
| PEG10        | ENST00000482108.1 |
| ZNF236       | ENST00000253159.8 |
| MOG          | ENST00000376902.3 |
| PPP4C        | ENST00000279387.7 |
| CLIC6        | ENST00000360731.3 |
| SIAE         | ENST00000263593.3 |
| LCE1D        | ENST00000326233.6 |
| FGF12        | ENST00000445105.2 |
| VAMP2        | ENST00000404970.3 |
| LRRC16A      | ENST00000329474.6 |
| RRNAD1       | ENST00000368218.4 |
| SMIM19       | ENST00000438528.3 |
| BCAT1        | ENST00000261192.7 |
| GNG2         | ENST00000556752.1 |
| BCL11B       | ENST00000357195.3 |
| DOK6         | ENST00000382713.5 |
| PHLDA3       | ENST00000367311.3 |
| C8orf48      | ENST00000297324.4 |
| GSTM5        | ENST00000369813.1 |
| AC007040.11  | ENST00000606025.1 |
| TMC2         | ENST00000358864.1 |
| CD160        | ENST00000369290.1 |
| PTBP1        | ENST00000350092.4 |
| SLC10A7      | ENST00000264986.3 |
| ZIC4         | ENST00000383075.3 |
| OCSTAMP      | ENST00000279028.2 |
| KPNA4        | ENST00000334256.4 |
| KLHL17       | ENST00000338591.3 |
| C15orf41     | ENST00000567389.1 |
| RP11-542P2.1 | ENST00000503109.2 |
| SNTB2        | ENST00000336278.4 |
| SPG21        | ENST00000204566.2 |
| GCM1         | ENST00000259803.7 |

|              |                   |
|--------------|-------------------|
| GYPA         | ENST00000360771.4 |
| MIDN         | ENST00000591446.2 |
| PEX2         | ENST00000357039.4 |
| RGS20        | ENST00000297313.3 |
| TAP2         | ENST00000374897.2 |
| TTPAL        | ENST00000372906.2 |
| PIM1         | ENST00000373509.5 |
| CTF1         | ENST00000279804.2 |
| RAB27B       | ENST00000262094.5 |
| CLOCK        | ENST00000309964.4 |
| ZNF627       | ENST00000588174.1 |
| FAM3C        | ENST00000359943.3 |
| CDC14A       | ENST00000370125.2 |
| SELRC1       | ENST00000371538.3 |
| ZNF345       | ENST00000589046.1 |
| MOB3B        | ENST00000262244.5 |
| ZNF30        | ENST00000601957.1 |
| ZNF772       | ENST00000425074.3 |
| ARHGEF25     | ENST00000333972.7 |
| ARL8B        | ENST00000419534.2 |
| AKT3         | ENST00000366539.1 |
| CCNK         | ENST00000389879.5 |
| MDM4         | ENST00000391947.2 |
| ZNF440       | ENST00000304060.5 |
| ZNF154       | ENST00000512439.2 |
| TMC3         | ENST00000558726.1 |
| CDSN         | ENST00000376288.2 |
| TRIM67       | ENST00000444294.3 |
| AC008948.1   | ENST00000597120.1 |
| ASXL3        | ENST00000269197.5 |
| FGF16        | ENST00000439435.1 |
| PAK3         | ENST00000372007.5 |
| WNK3         | ENST00000375169.3 |
| ADA          | ENST00000372874.4 |
| DLG1         | ENST00000346964.2 |
| RDH11        | ENST00000381346.4 |
| DHX16        | ENST00000376437.5 |
| RP11-89K11.1 | ENST00000558592.1 |
| MYADM        | ENST00000391770.4 |
| RP6-24A23.6  | ENST00000563887.1 |
| CBLN3        | ENST00000267406.6 |
| RAB2B        | ENST00000397762.1 |
| FAM222B      | ENST00000582266.1 |
| B3GALT5      | ENST00000380620.4 |
| TAL1         | ENST00000371884.2 |
| OR52B2       | ENST00000530810.1 |
| FAM73B       | ENST00000277475.5 |
| CAMK1        | ENST00000256460.3 |
| EMILIN3      | ENST00000332312.3 |
| ZNF444       | ENST00000592949.1 |
| PHF2         | ENST00000375376.4 |
| CSTB         | ENST00000291568.5 |
| CXCL12       | ENST00000343575.6 |
| GHR          | ENST00000230882.4 |

|            |                   |
|------------|-------------------|
| AL162407.1 | ENST00000451472.1 |
| ITGA2      | ENST00000296585.5 |
| ATP2B1     | ENST00000261173.2 |
| CRYBG3     | ENST00000389622.2 |
| ZKSCAN8    | ENST00000330236.6 |
| HMG20A     | ENST00000336216.4 |
| FSTL1      | ENST00000295633.3 |
| SSMEM1     | ENST00000297819.3 |
| OXGR1      | ENST00000298440.1 |
| CAND1      | ENST00000545606.1 |
| CSH2       | ENST00000336844.5 |
| KCTD7      | ENST00000275532.3 |
| MUC3A      | ENST00000319509.7 |
| HIST1H2BF  | ENST00000359985.1 |
| DCTN3      | ENST00000447983.2 |
| CARD16     | ENST00000375704.3 |
| C15orf26   | ENST00000286732.4 |
| TMED2      | ENST00000262225.3 |
| C5orf64    | ENST00000505642.1 |
| LCE1B      | ENST00000360090.3 |
| C2CD3      | ENST00000334126.7 |
| PI3        | ENST00000243924.3 |
| PFN2       | ENST00000239940.7 |
| NDUFA5     | ENST00000471770.1 |
| STK24      | ENST00000397517.2 |
| LY9        | ENST00000368037.5 |
| C20orf141  | ENST00000380589.4 |
| FHIT       | ENST00000492590.1 |
| ZCCHC17    | ENST00000344147.5 |
| TEKT1      | ENST00000338694.2 |
| ASAH2      | ENST00000395526.4 |
| HPGD       | ENST00000296522.6 |
| KIAA1549   | ENST00000440172.1 |
| SULT1B1    | ENST00000310613.3 |
| FN3KRP     | ENST00000269373.6 |
| RGS7       | ENST00000348120.2 |
| ABHD10     | ENST00000494817.1 |
| ANGPTL7    | ENST00000376819.3 |
| C20orf85   | ENST00000371168.3 |
| LYZL2      | ENST00000375318.2 |
| PGA4       | ENST00000378149.3 |
| BARD1      | ENST00000260947.4 |
| STMN4      | ENST00000519614.1 |
| IFIT2      | ENST00000371826.3 |
| SNTN       | ENST00000343837.3 |
| TMEM254    | ENST00000372275.1 |
| IRF2BP1    | ENST00000302165.3 |
| RINT1      | ENST00000257700.2 |
| PATE3      | ENST00000445202.1 |
| LYZL1      | ENST00000375500.3 |
| FAM13B     | ENST0000033079.3  |
| CWC27      | ENST00000381070.3 |
| SMO        | ENST00000249373.3 |
| TMEM155    | ENST00000394396.1 |

|              |                   |
|--------------|-------------------|
| PGA3         | ENST00000325558.6 |
| UPK2         | ENST00000264031.2 |
| DNAJC19      | ENST00000486355.1 |
| STAT1        | ENST00000540176.1 |
| OXLD1        | ENST00000571503.1 |
| TRIM22       | ENST00000379965.3 |
| TSSK6        | ENST00000360913.3 |
| SLC44A3      | ENST00000271227.6 |
| PJA2         | ENST00000361189.2 |
| EDEM1        | ENST00000256497.4 |
| TSPYL1       | ENST00000368608.3 |
| GPATCH2L     | ENST00000553588.1 |
| CCDC112      | ENST00000379611.5 |
| LIMS1        | ENST00000393310.1 |
| KRTAP9-7     | ENST00000391354.1 |
| C2orf76      | ENST00000409466.2 |
| ZNF704       | ENST00000327835.3 |
| RGS5         | ENST00000313961.5 |
| KRT37        | ENST00000225550.3 |
| SSU72        | ENST00000291386.3 |
| ACTR3B       | ENST00000256001.8 |
| ACSM1        | ENST00000307493.4 |
| SLC7A8       | ENST00000469263.1 |
| HIST2H2BE    | ENST00000369155.2 |
| VSIG1        | ENST00000415430.3 |
| ASAP3        | ENST00000495646.1 |
| KRT78        | ENST00000359499.4 |
| HCAR1        | ENST00000432564.1 |
| RYBP         | ENST00000477973.2 |
| MZT2B        | ENST00000281871.6 |
| MICALCL      | ENST00000256186.2 |
| PFDN4        | ENST00000371419.2 |
| SIRPG        | ENST00000381580.1 |
| CLDN9        | ENST00000445369.2 |
| TVP23A       | ENST00000299866.8 |
| ADI1         | ENST00000327435.6 |
| ARRB2        | ENST00000575877.1 |
| ALDH1A2      | ENST00000249750.4 |
| TRAM2        | ENST00000182527.3 |
| SPRYD4       | ENST00000338146.5 |
| IL17A        | ENST00000340057.1 |
| PDZRN4       | ENST00000298919.7 |
| PTAR1        | ENST00000377200.5 |
| IARS         | ENST00000375629.3 |
| RP11-57H12.6 | ENST00000604534.1 |
| S100A7A      | ENST00000368729.4 |
| NAF1         | ENST00000274054.2 |
| CLPX         | ENST00000300107.3 |
| LCE1E        | ENST00000368770.3 |
| LCORL        | ENST00000326877.4 |
| SLC39A11     | ENST00000255559.3 |
| KLHDC10      | ENST00000335420.5 |
| NTRK2        | ENST00000395882.1 |
| C3orf55      | ENST00000468043.1 |



|               |                    |
|---------------|--------------------|
| TEX30         | ENST00000376027. 1 |
| HMGXB4        | ENST00000216106. 5 |
| RBP5          | ENST00000266560. 3 |
| OR51E1        | ENST00000396952. 5 |
| FOXP1         | ENST00000318789. 4 |
| SLC16A5       | ENST00000580123. 1 |
| HIF3A         | ENST00000377670. 4 |
| FAAH2         | ENST00000374900. 4 |
| WDR26         | ENST00000414423. 2 |
| C9orf142      | ENST00000371620. 3 |
| RP11-758M4. 1 | ENST00000523118. 1 |
| LCE4A         | ENST00000368777. 1 |
| TMEM59L       | ENST00000600490. 1 |
| ZDHHC23       | ENST00000330212. 3 |
| CCKAR         | ENST00000295589. 3 |
| GALK2         | ENST00000327171. 3 |
| FAM71F1       | ENST00000315184. 5 |
| MPZL1         | ENST00000474859. 1 |
| RALGAPB       | ENST00000397038. 1 |
| PLVAP         | ENST00000252590. 4 |
| DEFB110       | ENST00000371148. 2 |
| CMC2          | ENST00000570195. 1 |
| RAPGEF1       | ENST00000372189. 3 |
| RCAN3         | ENST00000374395. 4 |
| ADAM32        | ENST00000437682. 2 |
| LY6D          | ENST00000301263. 4 |
| TMEM260       | ENST00000261556. 6 |
| WNT10B        | ENST00000407467. 1 |
| RBP3          | ENST00000224600. 4 |
| PDE3B         | ENST00000282096. 4 |
| RIMKLB        | ENST00000357529. 3 |
| CCDC66        | ENST00000436465. 2 |
| CXCL17        | ENST00000601181. 1 |
| SLC26A8       | ENST00000490799. 1 |
| IRF6          | ENST00000367021. 3 |
| AKIRIN1       | ENST00000432648. 3 |
| TNPO1         | ENST00000337273. 5 |
| PRRC2B        | ENST00000372249. 1 |
| MFAP3L        | ENST00000393704. 3 |
| CPN2          | ENST00000323830. 3 |
| REEP1         | ENST00000165698. 5 |
| ITPA          | ENST00000380113. 3 |
| TSLP          | ENST00000379706. 4 |
| SDK1          | ENST00000404826. 2 |
| TRIM4         | ENST00000355947. 2 |
| GLTP          | ENST00000318348. 4 |
| GSTM4         | ENST00000369833. 1 |
| CCNH          | ENST00000508855. 1 |
| CCDC149       | ENST00000428116. 2 |
| STK35         | ENST00000381482. 3 |
| SERPINB4      | ENST00000341074. 5 |
| SMPX          | ENST00000379494. 3 |
| MITF          | ENST00000328528. 6 |
| PTGES3L       | ENST00000453594. 1 |

|            |                   |
|------------|-------------------|
| AQP2       | ENST00000199280.3 |
| AP3S1      | ENST00000316788.7 |
| VPS26A     | ENST00000395098.1 |
| TMEM194A   | ENST00000379391.3 |
| ICA1L      | ENST00000392237.2 |
| ZNF654     | ENST00000309495.5 |
| RPA3-AS1   | ENST00000406829.1 |
| MAN1A2     | ENST00000356554.3 |
| SKA2       | ENST00000580541.1 |
| ARG2       | ENST00000261783.3 |
| DYNLT3     | ENST00000378581.3 |
| SRPK1      | ENST00000373825.2 |
| ARFIP1     | ENST00000451320.2 |
| MZT2A      | ENST00000309451.6 |
| AP1S3      | ENST00000396654.2 |
| MANBAL     | ENST00000397150.1 |
| KCNQ3      | ENST00000388996.4 |
| AGO1       | ENST00000373204.4 |
| MLEC       | ENST00000228506.3 |
| ASAP1      | ENST00000357668.1 |
| OSBP       | ENST00000263847.1 |
| ADCK1      | ENST00000238561.5 |
| FOXL2      | ENST00000330315.3 |
| MAP3K7CL   | ENST00000286791.5 |
| PDCD1LG2   | ENST00000397745.2 |
| MTERFD2    | ENST00000391980.2 |
| SCAMP4     | ENST00000316097.8 |
| HOXA10     | ENST00000283921.4 |
| PHF21B     | ENST00000403565.1 |
| DNAJC4     | ENST00000355040.4 |
| SCGN       | ENST00000334979.6 |
| FGA        | ENST00000403106.3 |
| RMI2       | ENST00000576027.1 |
| UBXN10     | ENST00000375099.3 |
| AC010441.1 | ENST00000600109.1 |
| GABRA4     | ENST00000264318.3 |
| OR12D3     | ENST00000396806.3 |
| C5AR2      | ENST00000595464.1 |
| C12orf36   | ENST00000318426.2 |
| SMAD4      | ENST00000398417.2 |
| HSPB6      | ENST00000587965.1 |
| UNC5C      | ENST00000453304.1 |
| KRTAP2-1   | ENST00000391419.3 |
| PCDH9      | ENST00000377861.3 |
| STX16      | ENST00000355957.5 |
| COMMD9     | ENST00000263401.5 |
| C14orf1    | ENST00000256319.6 |
| P4HA2      | ENST00000401867.1 |
| XCR1       | ENST00000309285.3 |
| TRIM52     | ENST00000327767.4 |
| VPS52      | ENST00000482399.1 |
| ANXA13     | ENST00000262219.6 |
| FAM107A    | ENST00000464064.1 |
| AC007431.1 | ENST00000299415.2 |

|            |                   |
|------------|-------------------|
| NUDT12     | ENST00000230792.2 |
| PTPRCAP    | ENST00000326294.3 |
| LEKR1      | ENST00000491763.1 |
| DENND1B    | ENST00000235453.4 |
| CPA4       | ENST00000445470.2 |
| FOXJ2      | ENST00000162391.3 |
| SEMA5A     | ENST00000382496.5 |
| EXO5       | ENST00000296380.4 |
| TRIM5      | ENST00000396847.3 |
| WFDC1      | ENST00000219454.5 |
| CDK17      | ENST00000543119.2 |
| AQP4       | ENST00000383168.4 |
| NOD2       | ENST00000300589.2 |
| HTR3E      | ENST00000415389.2 |
| DPT        | ENST00000367817.3 |
| SH3D19     | ENST00000409598.4 |
| PROSC      | ENST00000328195.3 |
| UGCG       | ENST00000374279.3 |
| PLEKHG7    | ENST00000344636.3 |
| ASB11      | ENST00000537676.1 |
| CLDN8      | ENST00000399899.1 |
| C6orf136   | ENST00000376473.5 |
| IKZF5      | ENST00000368886.5 |
| DIRAS2     | ENST00000375765.3 |
| PEX11B     | ENST00000369306.3 |
| PFKFB2     | ENST00000367080.3 |
| INIP       | ENST00000374242.4 |
| DISC1      | ENST00000439617.2 |
| GATA3      | ENST00000379328.3 |
| IGF2BP1    | ENST00000290341.3 |
| NCSTN      | ENST00000294785.5 |
| TAS2R5     | ENST00000247883.4 |
| RBBP8      | ENST00000399722.2 |
| ASPHD2     | ENST00000215906.5 |
| KCNE4      | ENST00000281830.3 |
| ABI1       | ENST00000376170.4 |
| ZDHHC15    | ENST00000373367.3 |
| CCDC115    | ENST00000437688.2 |
| E2F3       | ENST00000346618.3 |
| PDE4B      | ENST00000371045.5 |
| ACRV1      | ENST00000533904.1 |
| ARNTL2     | ENST00000546179.1 |
| FAM71E1    | ENST00000600100.1 |
| PCP4L1     | ENST00000504449.1 |
| RBM14-RBM4 | ENST00000412278.2 |
| STPG1      | ENST00000374409.1 |
| KRT31      | ENST00000251645.2 |
| PGK2       | ENST00000304801.3 |
| NFIB       | ENST00000397575.3 |
| PCMTD2     | ENST00000308824.6 |
| IGDCC4     | ENST00000352385.2 |
| SMIM9      | ENST00000369529.1 |
| PLP1       | ENST00000303958.2 |
| HGFAC      | ENST00000382774.3 |

|             |                   |
|-------------|-------------------|
| RBM4        | ENST00000310092.7 |
| NOVA2       | ENST00000263257.5 |
| UQCC1       | ENST00000349714.5 |
| RAB30       | ENST00000533486.1 |
| PAQR9       | ENST00000340634.3 |
| TNFSF9      | ENST00000245817.3 |
| FAM60A      | ENST00000539409.1 |
| SPRR4       | ENST00000328051.2 |
| S100A11     | ENST00000271638.2 |
| GCFC2       | ENST00000541687.1 |
| SLC25A30    | ENST00000539591.1 |
| SPATA3      | ENST00000452881.1 |
| ADH1A       | ENST00000209668.2 |
| TMED4       | ENST00000457408.2 |
| CDK3        | ENST00000425876.2 |
| C20orf26    | ENST00000377309.2 |
| RIC3        | ENST00000396677.2 |
| TM4SF4      | ENST00000305354.4 |
| ITPRIPL2    | ENST00000381440.3 |
| CT62        | ENST00000566432.1 |
| MID2        | ENST00000262843.6 |
| ATXN7L1     | ENST00000419735.3 |
| COMMD2      | ENST00000473414.1 |
| MCCC2       | ENST00000340941.6 |
| KIR2DL1     | ENST00000336077.6 |
| UBE2G1      | ENST00000396981.2 |
| ZNF552      | ENST00000391701.1 |
| KIR2DL3     | ENST00000434419.2 |
| KIAA1671    | ENST00000401395.1 |
| KRTAP5-2    | ENST00000412090.1 |
| HHLA3       | ENST00000361764.4 |
| FAM13C      | ENST00000373867.3 |
| SERPINI2    | ENST00000476257.1 |
| CSN3        | ENST00000304954.3 |
| SYN3        | ENST00000358763.2 |
| DNAJC27     | ENST00000264711.2 |
| CLIP4       | ENST00000320081.5 |
| KIF2A       | ENST00000381103.2 |
| CHCHD4      | ENST00000295767.5 |
| OLIG2       | ENST00000382357.3 |
| TMPRSS11BNL | ENST00000432593.3 |
| SLC22A16    | ENST00000439654.1 |
| KRTAP9-9    | ENST00000394008.1 |
| TMX2        | ENST00000378312.4 |
| POLR3H      | ENST00000396504.2 |
| PPP1R3C     | ENST00000238994.5 |
| RNF165      | ENST00000269439.7 |
| IFT46       | ENST00000530872.1 |
| HOXA1       | ENST00000355633.5 |
| NQO1        | ENST00000379047.3 |
| DSEL        | ENST00000310045.7 |
| H2BFM       | ENST00000355016.3 |
| EAPP        | ENST00000250454.3 |
| ENAM        | ENST00000396073.3 |

|            |                   |
|------------|-------------------|
| DLX6       | ENST00000518156.2 |
| ATOX1      | ENST00000521264.1 |
| CYB561D1   | ENST00000496961.1 |
| SRP54      | ENST00000556994.1 |
| INSM2      | ENST00000307169.3 |
| GPR39      | ENST00000329321.3 |
| SPR        | ENST00000234454.5 |
| DMBX1      | ENST00000360032.3 |
| NUDCD2     | ENST00000302764.4 |
| HERC6      | ENST00000264346.7 |
| VGLL3      | ENST00000398399.2 |
| PKNOX2     | ENST00000298282.9 |
| FCRL1      | ENST00000368176.3 |
| SULT1C2    | ENST00000251481.6 |
| TRIQQ      | ENST00000521988.1 |
| FBXO3      | ENST00000526785.1 |
| PNP        | ENST00000361505.5 |
| ARGLU1     | ENST00000400198.3 |
| KIAA1147   | ENST00000536163.1 |
| BLACE      | ENST00000378120.5 |
| MYC        | ENST00000377970.2 |
| CCDC39     | ENST00000273654.4 |
| NADK       | ENST00000341426.5 |
| CYP4F3     | ENST00000221307.8 |
| ABCB11     | ENST00000263817.6 |
| MCEE       | ENST00000244217.5 |
| HIST1H2BK  | ENST00000396891.4 |
| MIP        | ENST00000257979.4 |
| ADPRH      | ENST00000478399.1 |
| IP6K3      | ENST00000451316.1 |
| ARFGAP3    | ENST00000263245.5 |
| SLC02B1    | ENST00000289575.5 |
| SPRTN      | ENST00000391858.4 |
| FKBP8      | ENST00000597960.3 |
| EXTL2      | ENST00000370113.3 |
| SLC25A46   | ENST00000355943.3 |
| SPRYD3     | ENST00000301463.4 |
| C14orf2    | ENST00000553430.1 |
| SYT15      | ENST00000374323.4 |
| EML4       | ENST00000318522.5 |
| AL020996.1 | ENST00000536896.1 |
| RBM22      | ENST00000199814.4 |
| NUGGC      | ENST00000413272.2 |
| CYP2B6     | ENST00000324071.4 |
| RORA       | ENST00000335670.6 |
| TM2D2      | ENST00000456845.2 |
| LIN7C      | ENST00000278193.2 |
| VDAC1      | ENST00000395044.3 |
| RNF121     | ENST00000393713.3 |
| TIRAP      | ENST00000392679.1 |
| GPR27      | ENST00000304411.2 |
| PLAC9      | ENST00000372263.3 |
| LOR        | ENST00000368742.3 |
| ITPKB      | ENST00000272117.3 |

|           |                   |
|-----------|-------------------|
| PTPRH     | ENST00000376350.3 |
| ANKRD65   | ENST00000520296.1 |
| AADAC     | ENST00000232892.7 |
| RBMXL2    | ENST00000306904.5 |
| SH2B3     | ENST00000341259.2 |
| FAM76A    | ENST00000373954.6 |
| FAM89A    | ENST00000366654.4 |
| ABCD3     | ENST00000394233.2 |
| RCHY1     | ENST00000451788.1 |
| IL2RA     | ENST00000379959.3 |
| PAR6B     | ENST00000371610.2 |
| GPRIN3    | ENST00000609438.1 |
| RSF1      | ENST00000308488.6 |
| MME       | ENST00000460393.1 |
| RABGAP1L  | ENST00000489615.1 |
| HOXB5     | ENST00000239151.5 |
| FAM187A   | ENST00000412523.2 |
| MBNL1     | ENST00000357472.3 |
| GABRG1    | ENST00000295452.4 |
| GJB1      | ENST00000374022.3 |
| HSPBP1    | ENST00000255631.5 |
| ERLIN1    | ENST00000421367.2 |
| SLC39A14  | ENST00000381237.1 |
| SORCS1    | ENST00000369698.1 |
| PLXNA2    | ENST00000367033.3 |
| PAX7      | ENST00000420770.2 |
| OTUD6A    | ENST00000338352.2 |
| CLEC6A    | ENST00000382073.3 |
| RBBP4     | ENST00000373493.5 |
| ZNF561    | ENST00000326044.5 |
| VHL       | ENST00000256474.2 |
| SEC22A    | ENST00000481965.2 |
| TCL1B     | ENST00000340722.7 |
| AQP8      | ENST00000219660.5 |
| ELAVL4    | ENST00000371824.1 |
| PPIAL4C   | ENST00000369222.3 |
| MRPL13    | ENST00000306185.3 |
| COX10     | ENST00000261643.3 |
| PPIAL4G   | ENST00000419275.1 |
| OR52L1    | ENST00000332249.4 |
| PRKDC     | ENST00000314191.2 |
| CCL22     | ENST00000219235.4 |
| EEF2K     | ENST00000263026.5 |
| TMEM218   | ENST00000532156.1 |
| PPIAL4D   | ENST00000544708.1 |
| PPIAL4A   | ENST00000539781.1 |
| PPIAL4B   | ENST00000540273.1 |
| CACNG3    | ENST0000005284.3  |
| LINC00923 | ENST00000503874.3 |
| SPAG6     | ENST00000313311.6 |
| HIATL2    | ENST00000602917.1 |
| PRPS1     | ENST00000372435.4 |
| TBC1D5    | ENST00000253692.7 |
| HOPX      | ENST00000420433.1 |

|               |                    |
|---------------|--------------------|
| UBE2B         | ENST00000265339.2  |
| ACAA2         | ENST00000285093.10 |
| SLITRK5       | ENST00000325089.6  |
| MSANTD4       | ENST00000301919.4  |
| CAPN9         | ENST00000354537.1  |
| IL6           | ENST00000404625.1  |
| IRAK3         | ENST00000261233.4  |
| YWHAH         | ENST00000397492.1  |
| ERH           | ENST00000557016.1  |
| ADH6          | ENST00000394897.1  |
| TMEM154       | ENST00000304385.3  |
| DRD4          | ENST00000176183.5  |
| PAN2          | ENST00000425394.2  |
| OR10AD1       | ENST00000310248.2  |
| C9            | ENST00000263408.4  |
| SCAMP5        | ENST00000425597.3  |
| THOC3         | ENST00000265097.4  |
| EWSR1         | ENST00000397938.2  |
| ZNF259        | ENST00000227322.3  |
| AL117190.3    | ENST00000599197.1  |
| RP11-429E11.3 | ENST00000317652.1  |
| TFAP2C        | ENST00000201031.2  |
| TRAF3         | ENST00000560371.1  |
| SLC6A11       | ENST00000254488.2  |
| CHST9         | ENST00000580774.1  |
| WFDC9         | ENST00000326000.1  |
| HIRIP3        | ENST00000564026.1  |
| CD68          | ENST00000250092.6  |
| TMEM167B      | ENST00000338272.8  |
| DUSP9         | ENST00000370167.4  |
| SPARC         | ENST00000231061.4  |
| ZNF460        | ENST00000360338.3  |
| RNF139        | ENST00000303545.3  |
| BMP8B         | ENST00000372827.3  |
| ZCCHC8        | ENST00000536306.1  |
| PRDM7         | ENST00000325921.6  |
| MLF2          | ENST00000435120.1  |
| RMDN2         | ENST00000406384.1  |
| CXCL9         | ENST00000264888.5  |
| BHLHE40       | ENST00000256495.3  |
| C9orf85       | ENST00000486911.2  |
| CECR6         | ENST00000399875.1  |
| SAPCD1        | ENST00000415669.2  |
| FCGR3A        | ENST00000367969.3  |
| CLIC4         | ENST00000374379.4  |
| PRKAR1A       | ENST00000589228.1  |
| PRDM1         | ENST00000369089.3  |
| C2orf49       | ENST00000258457.2  |
| TRPC4AP       | ENST00000451813.2  |
| GNLY          | ENST00000263863.4  |
| THAP2         | ENST00000308086.2  |
| CD101         | ENST00000256652.4  |
| NDRG3         | ENST00000373803.2  |
| CLVS2         | ENST00000275162.5  |

|           |                   |
|-----------|-------------------|
| LYPD6     | ENST00000334166.4 |
| CDC42SE2  | ENST00000505065.1 |
| CST4      | ENST00000217423.3 |
| MBTD1     | ENST00000586178.1 |
| C10orf82  | ENST00000369210.3 |
| C12orf68  | ENST00000316554.3 |
| ERBB4     | ENST00000342788.4 |
| DCAF8     | ENST00000556710.1 |
| GABARAP   | ENST00000302386.5 |
| CDA       | ENST00000375071.3 |
| ZNF423    | ENST00000561648.1 |
| CDK15     | ENST00000450471.2 |
| PPP1R2    | ENST00000328432.3 |
| NME1-NME2 | ENST00000512737.1 |
| TBX3      | ENST00000349155.2 |
| CCNT2     | ENST00000295238.6 |
| FBX047    | ENST00000378079.2 |
| C11orf72  | ENST00000333139.3 |
| MLC1      | ENST00000395876.2 |
| ST8SIA1   | ENST00000396037.4 |
| APLF      | ENST00000303795.4 |
| RAD51     | ENST00000423169.2 |
| ZNF770    | ENST00000356321.4 |
| PTGES     | ENST00000340607.4 |
| MDM1      | ENST00000540418.1 |
| UGT3A2    | ENST00000282507.3 |
| FASTK     | ENST00000540185.1 |
| GINS1     | ENST00000429262.2 |
| ANXA5     | ENST00000296511.5 |
| RNF144A   | ENST00000320892.6 |
| CLGN      | ENST00000325617.5 |
| CASP14    | ENST00000427043.3 |
| ZNF676    | ENST00000397121.2 |
| SELM      | ENST00000402395.1 |
| NR4A3     | ENST00000330847.1 |
| PATE1     | ENST00000305738.5 |
| KBTBD7    | ENST00000379483.3 |
| FIS1      | ENST00000474120.1 |
| DNP1      | ENST00000393987.2 |
| DAAM1     | ENST00000395125.1 |
| KRTAP8-1  | ENST00000329621.4 |
| CST5      | ENST00000304710.4 |
| NEUROG2   | ENST00000313341.3 |
| NKAP      | ENST00000371410.3 |
| PRPS2     | ENST00000380668.5 |
| LSM1      | ENST00000520755.1 |
| TPM1      | ENST00000267996.7 |
| WASF2     | ENST00000536657.1 |
| HOXD3     | ENST00000249440.3 |
| MAGEE2    | ENST00000373359.2 |
| MTCP1     | ENST00000369476.3 |
| SLC28A3   | ENST00000376238.4 |
| FBX028    | ENST00000424254.2 |
| PWWP2A    | ENST00000456329.3 |



|               |                   |
|---------------|-------------------|
| KTN1          | ENST00000416613.1 |
| LY6G6C        | ENST00000495859.1 |
| ZFP69B        | ENST00000484445.1 |
| PLEKHB1       | ENST00000354190.5 |
| TMEM200B      | ENST00000521452.1 |
| VWA9          | ENST00000313182.2 |
| ZNF436        | ENST00000314011.4 |
| PGM2L1        | ENST00000298198.4 |
| RP11-322L20.1 | ENST00000557527.1 |
| ST8SIA2       | ENST00000268164.3 |
| PARVA         | ENST00000334956.8 |
| C7orf41       | ENST00000324453.8 |
| ALOX15        | ENST00000570836.1 |
| CPEB3         | ENST00000412050.4 |
| AL441883.1    | ENST00000600057.1 |
| NICN1         | ENST00000273598.3 |
| ITM2C         | ENST00000326407.6 |
| MEF2BNB-MEF2B | ENST00000444486.3 |
| CST1          | ENST00000304749.2 |
| SMAD1         | ENST00000302085.4 |
| ERMP1         | ENST00000381506.3 |
| SP8           | ENST00000418710.2 |
| PLSCR2        | ENST00000336685.2 |
| C10orf71      | ENST00000323868.4 |
| CASP1         | ENST00000533400.1 |
| USF1          | ENST00000368020.1 |
| RBBP9         | ENST00000337227.4 |
| MFSD1         | ENST00000415822.2 |
| STARD7        | ENST00000337288.5 |
| ZNF264        | ENST00000263095.6 |
| LIMD2         | ENST00000259006.3 |
| STK32A        | ENST00000397936.3 |
| C14orf39      | ENST00000321731.3 |
| CDKAL1        | ENST00000274695.4 |
| SEPT6         | ENST00000394610.1 |
| NUSAP1        | ENST00000260359.6 |
| MIPOL1        | ENST00000327441.7 |
| OR9Q1         | ENST00000335397.3 |
| RNF187        | ENST00000305943.7 |
| KIAA0040      | ENST00000423313.1 |
| BTLA          | ENST00000334529.5 |
| PPIA          | ENST00000468812.1 |
| METTL15       | ENST00000342303.5 |
| CPOX          | ENST00000264193.2 |
| PRPF6         | ENST00000535781.1 |
| PPTC7         | ENST00000354300.3 |
| NOTCH3        | ENST00000263388.2 |
| MAEA          | ENST00000303400.4 |
| PHF14         | ENST00000403050.3 |
| UGP2          | ENST00000394417.2 |
| PRLR          | ENST00000342362.5 |
| KATNBL1       | ENST00000256544.3 |
| XPNPEP1       | ENST00000369683.1 |
| FAM92B        | ENST00000539556.1 |

|               |                   |
|---------------|-------------------|
| MAN2A1        | ENST00000261483.4 |
| POU2F1        | ENST00000367866.2 |
| ZC3HAV1L      | ENST00000275766.1 |
| CYP2J2        | ENST00000371204.3 |
| RP11-295D22.1 | ENST00000565320.1 |
| GLOD5         | ENST00000303227.6 |
| ADCY1         | ENST00000432715.1 |
| ARL11         | ENST00000282026.1 |
| CHIC1         | ENST00000373504.6 |
| RP11-89N17.1  | ENST00000311067.3 |
| SCD           | ENST00000370355.2 |
| LINC00346     | ENST00000538077.1 |
| ABHD2         | ENST00000352732.5 |
| ISY1-RAB43    | ENST00000418265.1 |
| GNGT1         | ENST00000455502.1 |
| GLRB          | ENST00000541722.1 |
| ACSL6         | ENST00000379264.2 |
| CLLU1         | ENST00000378485.1 |
| CSNK1E        | ENST00000405675.3 |
| SLC2A3        | ENST00000075120.7 |
| SALL3         | ENST00000575389.2 |
| MOSPD2        | ENST00000380492.3 |
| RLN1          | ENST00000223858.4 |
| ZNF641        | ENST00000301042.3 |
| WNT8B         | ENST00000343737.5 |
| SLC2A13       | ENST00000280871.4 |
| BTN3A2        | ENST00000396948.1 |
| NGRN          | ENST00000379095.3 |
| NIPAL4        | ENST00000311946.7 |
| NKX3-1        | ENST00000380871.4 |
| ZNF235        | ENST00000291182.4 |
| CCDC126       | ENST00000307471.3 |
| NRGN          | ENST00000412681.2 |
| CCDC121       | ENST00000324364.3 |
| SWT1          | ENST00000367500.4 |
| LRIT3         | ENST00000594814.1 |
| RP11-366L20.2 | ENST00000356215.2 |
| CHGA          | ENST00000216492.5 |
| MAF           | ENST00000393350.1 |
| ACO1          | ENST00000309951.6 |
| IGF1          | ENST00000337514.6 |
| RPL32         | ENST00000429711.2 |
| PDE6A         | ENST00000255266.5 |
| ANXA7         | ENST00000372921.5 |
| TFCP2         | ENST00000257915.5 |
| MAGEA8        | ENST00000535454.1 |
| MTMR11        | ENST00000406732.3 |
| SCFD1         | ENST00000458591.2 |
| VSIG10        | ENST00000359236.5 |
| CCSAP         | ENST00000366687.1 |
| IFI6          | ENST00000361157.6 |
| SLC3A2        | ENST00000377892.1 |
| N4BP2L1       | ENST00000380139.4 |
| IPCEF1        | ENST00000265198.4 |

|          |                   |
|----------|-------------------|
| GLYATL2  | ENST00000287275.1 |
| MEAF6    | ENST00000373075.2 |
| ENOX2    | ENST00000370935.1 |
| USP7     | ENST00000344836.4 |
| ANKRD44  | ENST00000282272.8 |
| MAEL     | ENST00000367872.4 |
| DPCR1    | ENST00000462446.1 |
| TNIP1    | ENST00000520931.1 |
| CCL1     | ENST00000225842.3 |
| APTX     | ENST00000436040.2 |
| REPIN1   | ENST00000479668.1 |
| CSRNP2   | ENST00000228515.1 |
| FAM217B  | ENST00000358293.3 |
| ANKRD45  | ENST00000333279.2 |
| SNX13    | ENST00000409389.1 |
| LPCAT1   | ENST00000283415.3 |
| FAR1     | ENST00000354817.3 |
| PP13004  | ENST00000381493.2 |
| SPCS2    | ENST00000263672.6 |
| TMX4     | ENST00000246024.2 |
| DKK2     | ENST00000285311.3 |
| C4orf26  | ENST00000311623.4 |
| ZDHHC22  | ENST00000319374.4 |
| LIN28B   | ENST00000345080.4 |
| VMP1     | ENST00000262291.4 |
| CCR3     | ENST00000545097.1 |
| HMGA1    | ENST00000347617.6 |
| RERGL    | ENST00000229002.2 |
| EDEM3    | ENST00000318130.8 |
| KRTAP5-7 | ENST00000398536.4 |
| OAT      | ENST00000539214.1 |
| PLEKHA2  | ENST00000420274.1 |
| FAXC     | ENST00000389677.5 |
| ZRANB1   | ENST00000359653.4 |
| SOSTDC1  | ENST00000307068.4 |
| UBE2N    | ENST00000550657.1 |
| GPX6     | ENST00000361902.1 |
| BPGM     | ENST00000344924.3 |
| CXorf48  | ENST00000344129.2 |
| DAO      | ENST00000228476.3 |
| PPM1N    | ENST00000324688.4 |
| CLSTN2   | ENST00000458420.3 |
| TRIM66   | ENST00000299550.6 |
| COL15A1  | ENST00000375001.3 |
| CNNM3    | ENST00000377060.3 |
| CD84     | ENST00000534968.1 |
| MAP3K13  | ENST00000448876.1 |
| SLC6A13  | ENST00000445055.2 |
| TRAPPC4  | ENST00000533632.1 |
| CLEC1B   | ENST00000428126.2 |
| MED17    | ENST00000251871.3 |
| MYCBP    | ENST00000397572.2 |
| ELK4     | ENST00000357992.4 |
| TIA1     | ENST00000433529.2 |

|           |                   |
|-----------|-------------------|
| UBE2R2    | ENST00000263228.3 |
| CDH7      | ENST00000397968.2 |
| ARHGAP11A | ENST00000361627.3 |
| TSR2      | ENST00000375151.4 |
| SHISA6    | ENST00000441885.3 |
| PRR23A    | ENST00000383163.2 |
| EIF4EBP1  | ENST00000338825.4 |
| C2orf42   | ENST00000264434.2 |
| CA13      | ENST00000321764.3 |
| SLC9A3R1  | ENST00000262613.5 |
| PCNXL4    | ENST00000535349.1 |
| MYB       | ENST00000367814.4 |
| CXorf24   | ENST00000357412.1 |
| TMEM38A   | ENST00000187762.2 |
| PDE4C     | ENST00000355502.3 |
| SLC1A4    | ENST00000234256.3 |
| STRN      | ENST00000263918.4 |
| LRRC41    | ENST00000343304.6 |
| RORC      | ENST00000356728.6 |
| TMEM215   | ENST00000342743.5 |
| EXOC6B    | ENST00000272427.6 |
| ANXA8     | ENST00000357718.4 |
| ANXA8L2   | ENST00000340243.6 |
| R3HDML    | ENST00000217043.2 |
| ANXA8L1   | ENST00000358140.4 |
| METTL21B  | ENST00000333012.5 |
| ATRNL1    | ENST00000262919.5 |
| POM121C   | ENST00000257665.5 |
| NPHP3     | ENST00000326682.8 |
| REEP4     | ENST00000334530.5 |
| NUDT3     | ENST00000607016.1 |
| UCMA      | ENST00000378681.3 |
| HLA-A     | ENST00000396634.1 |
| WBP1L     | ENST00000369889.4 |
| LINC00908 | ENST00000578613.1 |
| FOXR2     | ENST00000339140.3 |
| DHX58     | ENST00000251642.3 |
| HNRNPA2B1 | ENST00000354667.4 |
| RBBP7     | ENST00000380087.2 |
| SPRY4     | ENST00000344120.4 |
| KIAA2018  | ENST00000316407.4 |
| RNPC3     | ENST00000533099.1 |
| RLN2      | ENST00000308420.3 |
| ASPA      | ENST00000263080.2 |
| GPR12     | ENST00000405846.3 |
| FEN1      | ENST00000305885.2 |
| ZC4H2     | ENST00000545618.1 |
| C12orf77  | ENST00000549828.1 |
| MATN2     | ENST00000254898.5 |
| B3GNT7    | ENST00000287590.5 |
| HEPH      | ENST00000519389.1 |
| FRMD6     | ENST00000395718.2 |
| IL12RB2   | ENST00000262345.1 |
| HNRNPA1   | ENST00000546500.1 |

|              |                   |
|--------------|-------------------|
| RAB3D        | ENST00000222120.3 |
| SFMBT1       | ENST00000394752.3 |
| CCNF         | ENST00000397066.4 |
| EGLN3        | ENST00000250457.3 |
| VRK2         | ENST00000412104.2 |
| MT-ND5       | ENST00000361567.2 |
| NHLH1        | ENST00000302101.5 |
| NUCKS1       | ENST00000367142.4 |
| GFPT1        | ENST00000357308.4 |
| SGK1         | ENST00000367858.5 |
| IFI44L       | ENST00000370751.5 |
| AC004899.1   | ENST00000596947.1 |
| BCL7A        | ENST00000538010.1 |
| MAPK1        | ENST00000215832.6 |
| CYP7B1       | ENST00000310193.3 |
| PPM1E        | ENST00000308249.2 |
| LTK          | ENST00000355166.5 |
| UBQLN4       | ENST00000368309.3 |
| MKX          | ENST00000375790.5 |
| MAGED1       | ENST00000326587.7 |
| FAM155A      | ENST00000375915.2 |
| MYCN         | ENST00000281043.3 |
| RP4-758J18.2 | ENST00000444362.1 |
| RGST1        | ENST00000417209.2 |
| METTL6       | ENST00000443029.1 |
| SYT11        | ENST00000368324.4 |
| IKZF4        | ENST00000262032.5 |
| CRYZL1       | ENST00000381540.3 |
| PDGFB        | ENST00000331163.6 |
| IL6ST        | ENST00000381287.4 |
| IRF2         | ENST00000393593.3 |
| FAM65B       | ENST00000259698.4 |
| C5orf51      | ENST00000381647.2 |
| PHF1         | ENST00000374512.3 |
| ALK          | ENST00000389048.3 |
| SLC15A3      | ENST00000227880.3 |
| ATF7IP       | ENST00000261168.4 |
| XPR1         | ENST00000367590.4 |
| MYH10        | ENST00000360416.3 |
| ITCH         | ENST00000374864.4 |
| POPDC2       | ENST00000264231.3 |
| ARMC8        | ENST00000469044.1 |
| TNF          | ENST00000449264.2 |
| OSBPL11      | ENST00000296220.5 |
| PRKCB        | ENST00000303531.7 |
| GOSR2        | ENST00000576910.2 |
| CDCP1        | ENST00000296129.1 |
| HHIP         | ENST00000296575.3 |
| KDSR         | ENST00000406396.3 |
| LILRA2       | ENST00000251377.3 |
| TBPL1        | ENST00000237264.4 |
| LANCL1       | ENST00000443314.1 |
| MROH2A       | ENST00000389758.3 |
| ZNF608       | ENST00000504926.1 |

|                |                   |
|----------------|-------------------|
| CLDN4          | ENST00000435050.1 |
| KLK5           | ENST00000391809.2 |
| AC068987.1     | ENST00000599343.1 |
| STAT2          | ENST00000314128.4 |
| RP11-1102P16.1 | ENST00000523987.1 |
| PCID2          | ENST00000337344.4 |
| C7orf72        | ENST00000297001.6 |
| SLC32A1        | ENST00000217420.1 |
| KRT4           | ENST00000551956.1 |
| ANKRD17        | ENST00000358602.4 |
| TATDN2         | ENST00000448281.2 |
| ARL15          | ENST00000502271.1 |
| HECTD2         | ENST00000371667.1 |
| AL626787.1     | ENST00000595430.1 |
| S100A4         | ENST00000368715.1 |
| SF1            | ENST00000377390.3 |
| TBC1D28        | ENST00000345096.4 |
| ABCB5          | ENST00000404938.2 |
| LENEP          | ENST00000392487.1 |
| PLD1           | ENST00000342215.6 |
| ZBTB80S        | ENST00000373501.2 |
| ASH2L          | ENST00000343823.6 |
| HIGD1A         | ENST00000321331.7 |
| RNF169         | ENST00000299563.4 |
| TRAPPC6B       | ENST00000330149.5 |
| NAAA           | ENST00000507187.2 |
| CALN1          | ENST00000329008.5 |
| CTTNBP2        | ENST00000160373.3 |
| MSL2           | ENST00000309993.2 |
| PATZ1          | ENST00000405309.3 |
| CX3CR1         | ENST00000399220.2 |
| RNASE13        | ENST00000382951.3 |
| NEBL           | ENST00000377122.4 |
| ANKRD13A       | ENST00000261739.4 |
| IQCJ           | ENST00000482126.1 |
| FGF13          | ENST00000315930.6 |
| PNOC           | ENST00000301908.3 |
| HCFC1R1        | ENST00000248089.3 |
| PROX1          | ENST00000366958.4 |
| C10orf25       | ENST00000298298.1 |
| EIF1           | ENST00000469257.1 |
| ALX4           | ENST00000329255.3 |
| ETV3           | ENST00000368192.4 |
| B3GNT5         | ENST00000326505.3 |
| CCDC176        | ENST00000394009.3 |
| FAM227B        | ENST00000558594.1 |
| MYOZ3          | ENST00000297130.4 |
| ERCC3          | ENST00000285398.2 |
| KRTAP5-4       | ENST00000399682.1 |
| ZBTB16         | ENST00000335953.4 |
| NT5DC3         | ENST00000392876.3 |
| RNASE1         | ENST00000397967.4 |
| POLR3F         | ENST00000377603.4 |
| CNRIP1         | ENST00000409862.1 |

|            |                   |
|------------|-------------------|
| NINJ2      | ENST00000305108.4 |
| AL450307.1 | ENST00000341866.3 |
| BCL2L2     | ENST00000250405.5 |
| MPZL3      | ENST00000278949.4 |
| WNT5A      | ENST00000474267.1 |
| RASSF4     | ENST00000374417.2 |
| AP3M1      | ENST00000355264.4 |
| PDCD5      | ENST00000419343.3 |
| TNFAIP8L2  | ENST00000368910.3 |
| LIMA1      | ENST00000552491.1 |
| DSTN       | ENST00000246069.7 |
| B4GALT7    | ENST0000029410.5  |
| NRXN2      | ENST00000301894.2 |
| SLC2A14    | ENST00000340749.5 |
| CFL1       | ENST00000525451.2 |
| ACOT4      | ENST00000326303.4 |
| C16orf47   | ENST00000358463.2 |
| YPEL5      | ENST00000379520.3 |
| ADC        | ENST00000373443.3 |
| BNIP1      | ENST00000368931.3 |
| WHSC1L1    | ENST00000317025.8 |
| DCAF12L2   | ENST00000538699.1 |
| TMEM165    | ENST00000381334.5 |
| POGLUT1    | ENST00000295588.4 |
| CTRC       | ENST00000375943.2 |
| FAM118B    | ENST00000533050.1 |
| ESCO1      | ENST00000269214.5 |
| BTN3A1     | ENST00000425234.2 |
| TPO        | ENST00000329066.4 |
| RAB7A      | ENST00000265062.3 |
| OLFML2B    | ENST00000294794.3 |
| DEGS2      | ENST00000305631.5 |
| GFI1       | ENST00000370332.1 |
| TTC26      | ENST00000430935.1 |
| VAPB       | ENST00000395802.3 |
| NR1I3      | ENST00000508387.1 |
| CD302      | ENST00000259053.4 |
| VGLL2      | ENST00000352536.3 |
| NHEJ1      | ENST00000356853.5 |
| MKLN1      | ENST00000352689.6 |
| ARHGEF12   | ENST00000397843.2 |
| SEPSECS    | ENST00000302922.3 |
| DPPA4      | ENST00000335658.6 |
| RMI1       | ENST00000325875.3 |
| ARHGAP19   | ENST00000358531.4 |
| PPM1L      | ENST00000498165.1 |
| DYNAP      | ENST00000321600.1 |
| ECM1       | ENST00000369047.4 |
| MIEF1      | ENST00000325301.2 |
| MCTP2      | ENST00000357742.4 |
| FAM126B    | ENST00000418596.3 |
| EDNRA      | ENST00000339690.5 |
| CSRP2BP    | ENST00000435364.3 |
| MSL1       | ENST00000398532.4 |

|          |                   |
|----------|-------------------|
| CCDC155  | ENST00000447857.3 |
| B3GNT3   | ENST00000318683.6 |
| COL22A1  | ENST00000303045.6 |
| FAM46B   | ENST00000289166.5 |
| HCCS     | ENST00000321143.4 |
| FRK      | ENST00000606080.1 |
| C17orf51 | ENST00000391411.5 |
| KCNH5    | ENST00000322893.7 |
| PTDSS1   | ENST00000517309.1 |
| DIO1     | ENST00000322679.6 |
| NRSN2    | ENST00000382291.3 |
| ANKRD13C | ENST00000370944.4 |
| LIN54    | ENST00000395282.2 |
| SPOCK1   | ENST00000394945.1 |
| TIMM10B  | ENST00000254616.6 |
| TM9SF2   | ENST00000376387.4 |
| VSTM2A   | ENST00000407838.3 |
| GPR151   | ENST00000311104.2 |
| C9orf170 | ENST00000375941.2 |
| OR2H1    | ENST00000377136.1 |
| SLC2A2   | ENST00000314251.3 |
| RDH12    | ENST00000551171.1 |
| MANF     | ENST00000528157.1 |
| MAP3K2   | ENST00000409947.1 |
| METTL7B  | ENST00000394252.3 |
| NALCN    | ENST00000251127.6 |
| SDHAF2   | ENST00000543265.1 |
| VPRBP    | ENST00000335891.5 |
| TCTN3    | ENST00000371217.5 |
| CCDC141  | ENST00000420890.2 |
| CCDC94   | ENST00000262962.7 |
| SOX9     | ENST00000245479.2 |
| LRP2BP   | ENST00000362004.3 |
| LRIG1    | ENST00000273261.3 |
| CA12     | ENST00000178638.3 |
| MXD4     | ENST00000337190.2 |
| CD207    | ENST00000410009.3 |
| NBPF6    | ENST00000294652.8 |
| RSPO3    | ENST00000356698.4 |
| ANKDD1B  | ENST00000601380.2 |
| GPR61    | ENST00000527748.1 |
| ASB6     | ENST00000277459.4 |
| UTS2B    | ENST00000340524.5 |
| SEC62    | ENST00000337002.4 |
| TTC30B   | ENST00000408939.3 |
| UBFD1    | ENST00000395878.3 |
| DEXI     | ENST00000331808.4 |
| ENTPD7   | ENST00000370489.4 |
| CARD8    | ENST00000520753.1 |
| ANP32B   | ENST00000339399.4 |
| TRIM14   | ENST00000341469.2 |
| RAD21    | ENST00000297338.2 |
| LENG8    | ENST00000326764.5 |
| GABPA    | ENST00000354828.3 |



|           |                   |
|-----------|-------------------|
| DRD2      | ENST00000355319.2 |
| NPY2R     | ENST00000506608.1 |
| DNM3      | ENST00000367731.1 |
| MAGED4    | ENST00000375626.3 |
| B3GALT2   | ENST00000367434.4 |
| SDCBP     | ENST00000260130.4 |
| CYP2A13   | ENST00000330436.3 |
| CSNK2A1   | ENST00000349736.5 |
| MAGED4B   | ENST00000360134.6 |
| SPATA19   | ENST00000299140.3 |
| SEMA6A    | ENST00000343348.6 |
| DHDDS     | ENST00000360009.2 |
| ZNF384    | ENST00000319770.3 |
| LUZP2     | ENST00000533227.1 |
| FADD      | ENST00000301838.4 |
| KCND3     | ENST00000369697.1 |
| SERINC3   | ENST00000342374.4 |
| C5orf24   | ENST00000394976.3 |
| SLC16A14  | ENST00000295190.4 |
| DNAJA3    | ENST00000262375.6 |
| PIK3R6    | ENST00000311434.9 |
| KRTAP5-11 | ENST00000398530.1 |
| USP28     | ENST00000003302.4 |
| CYB561D2  | ENST00000425346.1 |
| TMEM253   | ENST00000418511.2 |
| MAB21L2   | ENST00000317605.4 |
| SMS       | ENST00000404933.2 |
| SRD5A1    | ENST00000274192.5 |
| CD47      | ENST00000361309.5 |
| TNFRSF11A | ENST00000586569.1 |
| SLC13A5   | ENST00000433363.2 |
| ZNF805    | ENST00000535550.1 |
| C1orf61   | ENST00000368243.1 |
| BTN1A1    | ENST00000244513.6 |
| LAX1      | ENST00000442561.2 |
| ZEB1      | ENST00000361642.5 |
| ARFIP2    | ENST00000254584.2 |
| C9orf91   | ENST00000374049.4 |
| NDEL1     | ENST00000402554.3 |
| PTPLB     | ENST00000383657.5 |
| RAP2B     | ENST00000323534.2 |
| SCIN      | ENST00000297029.5 |
| SEC14L1   | ENST00000413679.2 |
| NME2      | ENST00000376392.6 |
| DYNLRB1   | ENST00000357156.2 |
| QKI       | ENST00000392127.2 |
| PLEKHB2   | ENST00000438882.2 |
| DAZAP2    | ENST00000412716.3 |
| CAMKK2    | ENST00000538733.1 |
| BCL2L1    | ENST00000393256.3 |
| FNBP1L    | ENST00000370253.2 |
| GAD2      | ENST00000376261.3 |
| RDX       | ENST00000343115.4 |
| ZNF8      | ENST00000608843.1 |

|              |                   |
|--------------|-------------------|
| SIX3         | ENST00000260653.3 |
| FLVCR2       | ENST00000238667.4 |
| DMRT3        | ENST00000190165.2 |
| TMPPE        | ENST00000416695.2 |
| NPTX1        | ENST00000306773.4 |
| CD109        | ENST00000437994.2 |
| HAND2        | ENST00000359562.4 |
| TMEM200A     | ENST00000296978.3 |
| C18orf21     | ENST00000592875.1 |
| HOXC10       | ENST00000303460.4 |
| UNC5D        | ENST00000287272.2 |
| SLC31A1      | ENST00000374212.4 |
| FZD3         | ENST00000240093.3 |
| EZR          | ENST00000337147.7 |
| BTBD9        | ENST00000314100.6 |
| STT3B        | ENST00000295770.2 |
| TTLL7        | ENST00000260505.8 |
| RAB33B       | ENST00000305626.5 |
| NCALD        | ENST00000395923.1 |
| C21orf49     | ENST00000382375.4 |
| CTAGE1       | ENST00000391403.2 |
| KRTAP4-12    | ENST00000394014.1 |
| C12orf40     | ENST00000324616.5 |
| GALM         | ENST00000272252.5 |
| RP11-10A14.4 | ENST00000518496.1 |
| EPB41L2      | ENST00000531410.1 |
| TMEM106B     | ENST00000396667.3 |
| MCU          | ENST00000373053.3 |
| NFAT5        | ENST00000354436.2 |
| RFX3         | ENST00000382004.3 |
| SHISA9       | ENST00000558583.1 |
| ASPG         | ENST00000551177.1 |
| SLC17A6      | ENST00000263160.3 |
| DAW1         | ENST00000373666.2 |
| SPRED2       | ENST00000356388.4 |
| CELF2        | ENST00000379261.4 |
| SNX18        | ENST00000343017.6 |
| SOAT2        | ENST00000301466.3 |
| NCAPH        | ENST00000240423.4 |
| SCAMP2       | ENST00000268099.9 |
| GPC2         | ENST00000292377.2 |
| PSENN        | ENST00000591949.1 |
| ZNF41        | ENST00000313116.7 |
| RAB31        | ENST00000578921.1 |
| GOLGA1       | ENST00000373555.4 |
| HIST1H2BD    | ENST00000289316.2 |
| CASP2        | ENST00000310447.5 |
| HDGFRP3      | ENST00000299633.4 |
| ELOVL7       | ENST00000508821.1 |
| PCMTD1       | ENST00000360540.5 |
| SLAMF6       | ENST00000368059.3 |
| GNAZ         | ENST00000248996.4 |
| FAM83A       | ENST00000518448.1 |
| THEMIS2      | ENST00000373925.1 |

|            |                    |
|------------|--------------------|
| FBXW11     | ENST00000296933.6  |
| HLA-G      | ENST00000376828.2  |
| GJB6       | ENST00000241124.6  |
| LRRK2      | ENST00000298910.7  |
| ACAD8      | ENST00000281182.4  |
| HRASLS5    | ENST00000539221.1  |
| SIT1       | ENST00000259608.3  |
| LAMP3      | ENST00000265598.3  |
| ATP9A      | ENST00000311637.5  |
| BNIP3      | ENST00000368636.4  |
| GBP4       | ENST00000355754.6  |
| TMEM100    | ENST00000424486.2  |
| FBLN7      | ENST00000331203.2  |
| AC012360.2 | ENST00000595531.1  |
| IRAK4      | ENST00000431837.1  |
| MANSC1     | ENST00000535902.1  |
| HOOK3      | ENST00000307602.4  |
| DESI2      | ENST00000302550.11 |
| GBP6       | ENST00000370456.4  |
| SLC1A2     | ENST00000278379.3  |
| CSF2RB     | ENST00000403662.3  |
| AC006372.1 | ENST00000444154.1  |
| ABTB1      | ENST00000393363.3  |
| POLD3      | ENST00000263681.2  |
| FAM98A     | ENST00000403368.1  |
| PRKCI      | ENST00000295797.4  |
| LIX1L      | ENST00000369308.3  |
| PDP2       | ENST00000311765.2  |
| CDC20B     | ENST00000334206.5  |
| CALR       | ENST00000316448.5  |
| SYS1       | ENST00000243918.5  |
| PLEKHA3    | ENST00000234453.5  |
| S1PR1      | ENST00000305352.6  |
| GAB2       | ENST00000340149.2  |
| MAML2      | ENST00000524717.1  |
| C14orf23   | ENST00000399387.4  |
| SLC2A10    | ENST00000359271.2  |
| SCN4B      | ENST00000324727.4  |
| MAPK10     | ENST00000395169.3  |
| C1orf158   | ENST00000288048.5  |
| DAZ3       | ENST00000382365.2  |
| CNR1       | ENST00000362094.5  |
| CDK6       | ENST00000265734.4  |
| TRIM8      | ENST00000302424.7  |
| SCIMP      | ENST00000574081.1  |
| PAPL       | ENST00000331256.5  |
| AKR1E2     | ENST00000298375.7  |
| HNF4G      | ENST00000396423.2  |
| PLLP       | ENST00000219207.5  |
| MOB1B      | ENST00000309395.2  |
| SARS2      | ENST00000221431.6  |
| SLC22A13   | ENST00000311856.4  |
| OTOGL      | ENST00000458043.2  |
| OTOP2      | ENST00000580223.1  |

|           |                    |
|-----------|--------------------|
| UBP1      | ENST00000283629.3  |
| ZNF585B   | ENST00000532828.2  |
| STX7      | ENST00000367941.2  |
| ASTN2     | ENST00000341734.4  |
| SNX19     | ENST00000265909.4  |
| F8        | ENST00000330287.6  |
| COL25A1   | ENST00000399132.1  |
| RPS9      | ENST00000441429.1  |
| BAZ2B     | ENST00000392782.1  |
| SNCB      | ENST00000310112.3  |
| P2RY4     | ENST00000374519.2  |
| TEX35     | ENST00000367642.3  |
| PDCD7     | ENST00000204549.4  |
| ZFY       | ENST00000383052.1  |
| WDR70     | ENST00000265107.4  |
| CCDC88A   | ENST00000336838.6  |
| HOXA3     | ENST00000396352.4  |
| ZC3HAV1   | ENST00000242351.5  |
| NR6A1     | ENST00000487099.2  |
| HIST1H2BN | ENST00000606613.1  |
| CLSPN     | ENST00000318121.3  |
| GK5       | ENST00000392993.2  |
| RDH16     | ENST00000398138.3  |
| ZNF441    | ENST00000357901.4  |
| DAZ4      | ENST00000382290.3  |
| RCC1      | ENST00000373833.6  |
| C19orf66  | ENST00000253110.11 |
| MINOS1    | ENST00000322753.6  |
| GALNT15   | ENST00000339732.5  |
| ITGAL     | ENST00000356798.6  |
| ABCA12    | ENST00000272895.7  |
| NAT16     | ENST00000300303.2  |
| FABP7     | ENST00000356535.4  |
| NDUFAF5   | ENST00000378106.5  |
| PRPF4B    | ENST00000337659.6  |
| FAM169B   | ENST00000558256.1  |
| SEPT3     | ENST00000396425.3  |
| TPD52L3   | ENST00000344545.5  |
| FCRL6     | ENST00000321935.6  |
| MUM1L1    | ENST00000357175.2  |
| TMEM62    | ENST00000260403.2  |
| AMOTL1    | ENST00000317837.9  |
| PTPN14    | ENST00000366956.5  |
| PRRC1     | ENST00000296666.8  |
| ZC3H12C   | ENST00000278590.3  |
| PIANP     | ENST00000534837.1  |
| AMN1      | ENST00000281471.6  |
| GRHL2     | ENST00000251808.3  |
| LDHA      | ENST00000227157.4  |
| NLRX1     | ENST00000409109.1  |
| SCN8A     | ENST00000354534.6  |
| CLEC4D    | ENST00000299665.2  |
| CORO1C    | ENST00000261401.3  |
| RCVRN     | ENST00000226193.5  |

|              |                   |
|--------------|-------------------|
| LARP4        | ENST00000398473.2 |
| FRMD5        | ENST00000484674.1 |
| MAP4K5       | ENST00000013125.4 |
| BMP7         | ENST00000395863.3 |
| ZADH2        | ENST00000322342.3 |
| ZNF709       | ENST00000397732.3 |
| MANEAL       | ENST00000397631.3 |
| RP11-156E8.1 | ENST00000607453.1 |
| KCNK13       | ENST00000282146.4 |
| TACR2        | ENST00000373307.1 |
| CIAO1        | ENST00000488633.1 |
| ZIC2         | ENST00000376335.3 |
| SCN3B        | ENST00000392770.2 |
| CD72         | ENST00000396757.1 |
| ZBTB41       | ENST00000367405.4 |
| CCDC50       | ENST00000392455.3 |
| PCGF5        | ENST00000336126.5 |
| DCC          | ENST00000442544.2 |
| MMP16        | ENST00000286614.6 |
| ZHX1         | ENST00000395571.3 |
| SCNN1B       | ENST00000343070.2 |
| FBN1         | ENST00000316623.5 |
| PELI3        | ENST00000320740.7 |
| TRAK2        | ENST00000332624.3 |
| KCNG4        | ENST00000308251.4 |
| GSTM1        | ENST00000309851.5 |
| CD83         | ENST00000379153.3 |
| HCLS1        | ENST00000314583.3 |
| SYT4         | ENST00000255224.3 |
| C1orf213     | ENST00000335648.3 |
| NECAP1       | ENST00000339754.5 |
| COL5A2       | ENST00000374866.3 |
| FAM69A       | ENST00000370310.4 |
| COL4A3       | ENST00000396578.3 |
| CTC-360G5.8  | ENST00000599996.1 |
| TNFSF4       | ENST00000367718.1 |
| ATP6AP1      | ENST00000369762.2 |
| MXRA7        | ENST00000355797.3 |
| LRRN4        | ENST00000378858.4 |
| PISD         | ENST00000397500.1 |
| DAZ2         | ENST00000382449.1 |
| USP51        | ENST00000500968.3 |
| INCA1        | ENST00000355025.3 |
| PCYT1B       | ENST00000379145.1 |
| PRICKLE2     | ENST00000295902.6 |
| PAFAH2       | ENST00000374282.3 |
| ENPEP        | ENST00000265162.5 |
| ALDH9A1      | ENST00000354775.4 |
| TM9SF4       | ENST00000398022.2 |
| SLC6A6       | ENST00000454876.2 |
| CREG1        | ENST00000370509.4 |
| PIK3CG       | ENST00000359195.3 |
| MYEOV        | ENST00000308946.3 |
| COIL         | ENST00000240316.4 |

|          |                   |
|----------|-------------------|
| TTC18    | ENST00000310715.3 |
| MEF2B    | ENST00000409224.1 |
| CD300LG  | ENST00000317310.4 |
| MARCH8   | ENST00000453424.2 |
| POLR3G   | ENST00000504930.1 |
| DYSF     | ENST00000258104.3 |
| QRFPR    | ENST00000394427.2 |
| ZNF852   | ENST00000436261.1 |
| SNX17    | ENST00000233575.2 |
| KLF15    | ENST00000296233.3 |
| IDI1     | ENST00000381344.3 |
| HCN3     | ENST00000368358.3 |
| SUDS3    | ENST00000397564.2 |
| ERO1L    | ENST00000395686.3 |
| MED8     | ENST00000372457.4 |
| C5AR1    | ENST00000355085.3 |
| KANK2    | ENST00000586659.1 |
| CTNS     | ENST00000046640.3 |
| LILRA6   | ENST00000391735.3 |
| TAZ      | ENST00000299328.5 |
| CADPS    | ENST00000383710.4 |
| FAM133A  | ENST00000538690.1 |
| NMNAT2   | ENST00000294868.4 |
| FAM180A  | ENST00000338588.3 |
| DNAJA1   | ENST00000330899.4 |
| HDAC9    | ENST00000405010.3 |
| CREB5    | ENST00000357727.2 |
| TMBIM1   | ENST00000258412.3 |
| GPR135   | ENST00000395116.1 |
| PIK3R3   | ENST00000262741.5 |
| PPP1R12A | ENST00000261207.5 |
| JMJD8    | ENST00000412368.2 |
| ARL2     | ENST00000246747.4 |
| VAMP1    | ENST00000361716.3 |
| PTPN11   | ENST00000351677.2 |
| NKX1-2   | ENST00000451024.3 |
| SOHLH2   | ENST00000379881.3 |
| FBXO21   | ENST00000427718.2 |
| GAPDHS   | ENST00000222286.4 |
| PIK3C2G  | ENST00000433979.1 |
| SORCS2   | ENST00000507866.2 |
| RABL3    | ENST00000273375.3 |
| CCDC103  | ENST00000417826.2 |
| SIRT1    | ENST00000212015.6 |
| FGFR10P2 | ENST00000546072.1 |
| MMGT1    | ENST00000305963.2 |
| ADAMDEC1 | ENST00000256412.4 |
| CHRNB1   | ENST00000306071.2 |
| MRPS11   | ENST00000325844.4 |
| CCDC140  | ENST00000295226.1 |
| PRIMA1   | ENST00000393140.1 |
| HR       | ENST00000381418.4 |
| CEP290   | ENST00000547691.2 |
| TRIM27   | ENST00000377194.3 |

|               |                   |
|---------------|-------------------|
| TMPRSS3       | ENST00000398405.1 |
| TBX5          | ENST00000349716.5 |
| DOK5          | ENST00000262593.5 |
| ARHGEF7       | ENST00000426073.2 |
| CXXC4         | ENST00000394767.2 |
| C19orf10      | ENST00000262947.3 |
| CCT4          | ENST00000394440.3 |
| MBNL3         | ENST00000370839.3 |
| RPS6KB1       | ENST00000225577.4 |
| MAOB          | ENST00000538942.1 |
| FAM178A       | ENST00000238961.4 |
| ZNF260        | ENST00000523638.1 |
| HCN4          | ENST00000261917.3 |
| URGCP-MRPS24  | ENST00000603700.1 |
| USP39         | ENST00000409766.3 |
| GUCY2C        | ENST00000261170.3 |
| CPNE3         | ENST00000198765.4 |
| APEX2         | ENST00000374987.3 |
| POLR1D        | ENST00000399697.3 |
| SLC16A1       | ENST00000369626.3 |
| MRPL50        | ENST00000374865.4 |
| C12orf61      | ENST00000408887.2 |
| RIPK3         | ENST00000216274.5 |
| PTGES3        | ENST00000262033.6 |
| TRIM44        | ENST00000299413.5 |
| KCNJ16        | ENST00000589377.1 |
| PRKX          | ENST00000262848.5 |
| MIB1          | ENST00000261537.6 |
| SIRPB1        | ENST00000279477.7 |
| XPO7          | ENST00000252512.9 |
| CTD-2054N24.2 | ENST00000559714.1 |
| ZSCAN32       | ENST00000574940.1 |
| KIAA1456      | ENST00000524591.2 |
| KIAA1217      | ENST00000396445.1 |
| NECAP2        | ENST00000337132.5 |
| SNN           | ENST00000329565.5 |
| SLC7A14       | ENST00000231706.5 |
| RUFY2         | ENST00000388768.2 |
| SLC6A20       | ENST00000353278.4 |
| FGF7          | ENST00000267843.4 |
| NFAM1         | ENST00000329021.5 |
| PRSS8         | ENST00000317508.6 |
| ZNF302        | ENST00000505365.2 |
| LRRC8A        | ENST00000372600.4 |
| HSPB7         | ENST00000411503.1 |
| LPL           | ENST00000311322.8 |
| PRDM6         | ENST00000407847.4 |
| VWC2L         | ENST00000427124.1 |
| RAPGEF6       | ENST00000509018.1 |
| DBF4B         | ENST00000315005.3 |
| PAX1          | ENST00000444366.2 |
| IER5L         | ENST00000372491.2 |
| GSPT2         | ENST00000340438.4 |
| POLR3D        | ENST00000397802.4 |

|               |                    |
|---------------|--------------------|
| FYB           | ENST00000351578.6  |
| CAMK2D        | ENST00000296402.5  |
| SFTP1A1       | ENST00000398636.3  |
| BCAS3         | ENST00000589222.1  |
| RP11-122A3.2  | ENST00000517562.2  |
| PRSS16        | ENST00000230582.3  |
| STRN3         | ENST00000355683.5  |
| PIP4K2B       | ENST00000269554.3  |
| TMEM40        | ENST00000314124.7  |
| RP11-169F17.1 | ENST00000581862.1  |
| PLEK2         | ENST00000216446.4  |
| BMPR2         | ENST00000374574.2  |
| XKRX          | ENST00000468904.1  |
| IKZF3         | ENST00000346872.3  |
| PLAG1         | ENST00000316981.3  |
| GDAP1         | ENST00000220822.7  |
| CXXC5         | ENST00000302517.3  |
| GALNT6        | ENST00000543196.2  |
| STEAP4        | ENST00000380079.4  |
| ADAM28        | ENST00000265769.4  |
| SMARCAD1      | ENST00000354268.4  |
| NLRC3         | ENST00000448023.2  |
| RGAG1         | ENST00000465301.2  |
| C14orf159     | ENST00000256324.10 |
| AC002472.13   | ENST00000543388.1  |
| TOP3A         | ENST00000321105.5  |
| MYZAP         | ENST00000267853.5  |
| C15orf54      | ENST00000318578.3  |
| PCYOX1        | ENST00000264441.5  |
| VMAC          | ENST00000339485.3  |
| ZNF488        | ENST00000494156.1  |
| UBALD2        | ENST00000327490.6  |
| ME1           | ENST00000369705.3  |
| CDC7          | ENST00000234626.6  |
| MTX3          | ENST00000509852.1  |
| AIDA          | ENST00000340020.6  |
| PTPRB         | ENST00000334414.6  |
| HSPA9         | ENST00000297185.3  |
| CCDC92        | ENST00000238156.3  |
| ANKRD36       | ENST00000357042.4  |
| KCNB1         | ENST00000371741.4  |
| PRRT2         | ENST00000300797.6  |
| CHML          | ENST00000366553.1  |
| CDKL4         | ENST00000378803.1  |
| SASH3         | ENST00000356892.3  |
| ESR2          | ENST00000557772.1  |
| MFS10         | ENST00000508221.1  |
| CASP9         | ENST00000546424.1  |
| GCC1          | ENST00000321407.2  |
| TGFB1P1       | ENST00000393359.2  |
| C17orf80      | ENST00000359042.2  |
| SYNCRIP       | ENST00000355238.6  |
| SIX1          | ENST00000247182.6  |
| ARHGEF10      | ENST00000520359.1  |



|              |                   |
|--------------|-------------------|
| GRIA4        | ENST00000527669.1 |
| ZBTB12       | ENST00000375527.2 |
| FLJ00388     | ENST00000594280.1 |
| SSTR1        | ENST00000267377.2 |
| RP11-93B14.6 | ENST00000370520.3 |
| CPT1A        | ENST00000265641.5 |
| LEPREL1      | ENST00000319332.5 |
| PLXNA4       | ENST00000321063.4 |
| CHST11       | ENST00000549260.1 |
| CCDC113      | ENST00000443128.2 |
| CAMKMT       | ENST00000378494.3 |
| TEX22        | ENST00000451127.2 |
| PICALM       | ENST00000532317.1 |
| HSPA13       | ENST00000285667.3 |
| MECOM        | ENST00000460814.1 |
| PRMT6        | ENST00000370078.1 |
| BEND4        | ENST00000504360.1 |
| TMEM140      | ENST00000275767.3 |
| TYSND1       | ENST00000335494.5 |
| GEMIN8       | ENST00000380523.4 |
| C7orf31      | ENST00000409280.1 |
| EHHADH       | ENST00000231887.3 |
| RPS6KC1      | ENST00000366960.3 |
| CHST10       | ENST00000264249.3 |
| SFTPA2       | ENST00000372325.2 |
| ALO49747.1   | ENST00000594060.1 |
| GRHL3        | ENST00000361548.4 |
| PROSER1      | ENST00000352251.3 |
| KLK7         | ENST00000391807.1 |
| BCAS4        | ENST00000371608.2 |
| LYPLA1       | ENST00000316963.3 |
| LURAP1L      | ENST00000319264.3 |
| SLC25A16     | ENST00000609923.1 |
| KAT7         | ENST00000259021.4 |
| AL354993.1   | ENST00000439873.2 |
| POM121L2     | ENST00000444565.1 |
| IL9R         | ENST00000424344.3 |
| AICDA        | ENST00000229335.6 |
| SLC10A1      | ENST00000216540.4 |
| AKAP1        | ENST00000337714.3 |
| ZKSCAN1      | ENST00000324306.6 |
| NANOS2       | ENST00000341294.2 |
| FAM19A1      | ENST00000478136.1 |
| LRRC66       | ENST00000343457.3 |
| SOS2         | ENST00000216373.5 |
| C7orf73      | ENST00000507606.1 |
| ZNF507       | ENST00000311921.4 |
| CEACAM7      | ENST00000006724.3 |
| BNC2         | ENST00000380672.4 |
| SEL1L        | ENST00000336735.4 |
| FAM109A      | ENST00000361483.3 |
| DCUN1D3      | ENST00000324344.4 |
| CNIH4        | ENST00000465271.1 |
| ZNF280B      | ENST00000360412.2 |

|            |                   |
|------------|-------------------|
| ERO1LB     | ENST00000354619.5 |
| HIST1H3H   | ENST00000369163.2 |
| ACO08060.7 | ENST00000401499.1 |
| WBP2NL     | ENST00000328823.9 |
| OTP        | ENST00000306422.3 |
| KLK12      | ENST00000529888.1 |
| SLFNL1     | ENST00000302946.8 |
| SYNGAP1    | ENST00000418600.2 |
| STAMBP     | ENST00000394070.2 |
| ALG10B     | ENST00000308742.4 |
| SLC25A45   | ENST00000527174.1 |
| DAZ1       | ENST00000405239.1 |
| LY75-CD302 | ENST00000504764.1 |
| LY75       | ENST00000554112.1 |
| EID2B      | ENST00000326282.4 |
| ASCL4      | ENST00000342331.4 |
| MAFG       | ENST00000357736.4 |
| MED18      | ENST00000373842.4 |
| SCOC       | ENST00000608372.1 |
| LGSN       | ENST00000370658.5 |
| FAM220A    | ENST00000313324.4 |
| PRKACB     | ENST00000370689.2 |
| ACO22498.1 | ENST00000392468.2 |
| ZNF865     | ENST00000568956.1 |
| TOX4       | ENST00000405508.1 |
| RNF141     | ENST00000265981.2 |
| RBM28      | ENST00000223073.2 |
| BMPR1A     | ENST00000372037.3 |
| PSME3      | ENST00000541124.1 |
| KIAA0825   | ENST00000513200.3 |
| MPP7       | ENST00000375732.1 |
| SMARCD1    | ENST00000394963.4 |
| INA        | ENST00000369849.4 |
| TMEM135    | ENST00000340353.7 |
| ANGPTL2    | ENST00000373425.3 |
| SNTG1      | ENST00000522124.1 |
| ANKRD16    | ENST00000191063.8 |
| TLR5       | ENST00000540964.1 |
| BRD2       | ENST00000374825.4 |
| CLRN1      | ENST00000327047.1 |
| PUS7L      | ENST00000416848.2 |
| SPHKAP     | ENST00000392056.3 |
| TMC01      | ENST00000392129.6 |
| SLC17A7    | ENST00000221485.3 |
| MINPP1     | ENST00000371994.4 |
| PTP4A2     | ENST00000602725.1 |
| CHST14     | ENST00000306243.5 |
| URM1       | ENST00000372850.1 |
| ZFYVE27    | ENST00000453958.2 |
| PHACTR4    | ENST00000373839.3 |
| INPP4B     | ENST00000513000.1 |
| FAM49A     | ENST00000381323.3 |
| GTF2H1     | ENST00000265963.4 |
| CEACAM19   | ENST00000358777.4 |

|               |                   |
|---------------|-------------------|
| TMEM119       | ENST00000392806.3 |
| GPR85         | ENST00000297146.3 |
| FOXO4         | ENST00000374259.3 |
| COL9A1        | ENST00000357250.6 |
| MARS2         | ENST00000282276.6 |
| PPP1R18       | ENST00000399199.3 |
| RPAP2         | ENST00000610020.1 |
| ZNFX1         | ENST00000371752.1 |
| SV2C          | ENST00000502798.2 |
| RP11-192H23.4 | ENST00000534850.1 |
| F11R          | ENST00000368026.6 |
| GNE           | ENST00000396594.3 |
| AVEN          | ENST00000306730.3 |
| ZBTB26        | ENST00000373656.3 |
| CHCHD1        | ENST00000372837.3 |
| LONRF1        | ENST00000398246.3 |
| NAT14         | ENST00000205194.4 |
| C2orf50       | ENST00000381585.3 |
| PPP3R2        | ENST00000374806.1 |
| TMEM87B       | ENST00000283206.4 |
| C11orf88      | ENST00000529167.1 |
| GPR153        | ENST00000377893.2 |
| AWAT1         | ENST00000374521.3 |
| C6orf201      | ENST00000380175.4 |
| ARF6          | ENST00000298316.5 |
| SRR           | ENST00000344595.5 |
| ANAPC7        | ENST00000455511.3 |
| ZYG11A        | ENST00000371532.1 |
| PRRX1         | ENST00000367760.3 |
| UBR7          | ENST00000013070.6 |
| MPRIP         | ENST00000341712.4 |
| PAK1          | ENST00000278568.4 |
| PVRL3         | ENST00000319792.3 |
| MED28         | ENST00000237380.7 |
| PPP1R3A       | ENST00000284601.3 |
| CLCA2         | ENST00000370565.4 |
| WBP2          | ENST00000254806.3 |
| SMARCA2       | ENST00000349721.2 |
| SNAP91        | ENST00000521485.1 |
| TNR           | ENST00000367674.2 |
| AC007375.1    | ENST00000600936.1 |
| TPBGL         | ENST00000562197.2 |
| DPYSL2        | ENST00000311151.5 |
| MOCS1         | ENST00000373186.4 |
| FSIP1         | ENST00000350221.3 |
| CCR9          | ENST00000357632.2 |
| JHDM1D        | ENST00000397560.2 |
| THBS1         | ENST00000260356.5 |
| KCTD16        | ENST00000507359.3 |
| FAM213B       | ENST00000378424.4 |
| TRPM3         | ENST00000377110.3 |
| SLC31A2       | ENST00000259392.3 |
| PTGDS         | ENST00000224167.2 |
| ZSCAN9        | ENST00000527436.1 |

|            |                   |
|------------|-------------------|
| NBPF4      | ENST00000415641.3 |
| TMEM30A    | ENST00000230461.6 |
| NR2F2      | ENST00000394166.3 |
| TFAP4      | ENST00000204517.6 |
| ZNF580     | ENST00000325333.5 |
| PADI2      | ENST00000375486.4 |
| NCOA1      | ENST00000405141.1 |
| MAGOHB     | ENST00000539554.1 |
| H1FO       | ENST00000340857.2 |
| TMEM127    | ENST00000258439.3 |
| MSRB3      | ENST00000308259.5 |
| ZBTB46     | ENST00000245663.4 |
| TM4SF1     | ENST00000472441.1 |
| PAG1       | ENST00000220597.4 |
| CXorf36    | ENST00000398000.2 |
| HNF1B      | ENST00000225893.4 |
| ESR1       | ENST00000440973.1 |
| GTPBP2     | ENST00000307126.5 |
| INO80D     | ENST00000403263.1 |
| RUNDC3A    | ENST00000426726.3 |
| ZNF160     | ENST00000599056.1 |
| SSR3       | ENST00000476217.1 |
| C18orf25   | ENST00000282059.6 |
| MRPL17     | ENST00000288937.6 |
| ATP6V1A    | ENST00000273398.3 |
| HADH       | ENST00000403312.1 |
| DAK        | ENST00000394900.3 |
| ZEB2       | ENST00000558170.2 |
| SNAP23     | ENST00000249647.3 |
| PHLPP2     | ENST00000568954.1 |
| PRAMEF18   | ENST00000376126.2 |
| CTNNA3     | ENST00000433211.2 |
| KCNK12     | ENST00000327876.4 |
| PRAMEF19   | ENST00000540591.1 |
| TTC31      | ENST00000410003.1 |
| PITPNM3    | ENST00000421306.3 |
| TAB3       | ENST00000378933.1 |
| SLIT2      | ENST00000504154.1 |
| CD38       | ENST00000226279.3 |
| TEAD1      | ENST00000361905.4 |
| TTC33      | ENST00000337702.4 |
| KIAA1462   | ENST00000375377.1 |
| DUSP28     | ENST00000405954.1 |
| CAPRIN1    | ENST00000341394.4 |
| AMER2      | ENST00000357816.2 |
| AL033381.1 | ENST00000314040.1 |
| PRAMEF22   | ENST00000376187.1 |
| HTR1F      | ENST00000319595.4 |
| DPF2       | ENST00000528416.1 |
| OTUD4      | ENST00000454497.2 |
| PRAMEF3    | ENST00000353410.5 |
| PPP2R2C    | ENST00000335585.5 |
| C7         | ENST00000313164.9 |
| SLC26A2    | ENST00000286298.4 |

|             |                   |
|-------------|-------------------|
| TFEC        | ENST00000265440.7 |
| CNDP1       | ENST00000582365.1 |
| SAE1        | ENST00000392776.3 |
| BCAP29      | ENST00000005259.4 |
| SERPINB5    | ENST00000382771.4 |
| MPZL2       | ENST00000278937.2 |
| GPD2        | ENST00000540309.1 |
| PRKAB1      | ENST00000229328.5 |
| TNRC6B      | ENST00000335727.9 |
| CLDN2       | ENST00000336803.1 |
| AADACL4     | ENST00000376221.1 |
| LDLRAP1     | ENST00000374338.4 |
| CDK20       | ENST00000375871.4 |
| CRCP        | ENST00000415001.2 |
| NPNT        | ENST00000379987.2 |
| KXD1        | ENST00000540691.1 |
| CBX5        | ENST00000209875.4 |
| FHL1        | ENST00000394155.2 |
| SPOP        | ENST00000393328.2 |
| DAG1        | ENST00000515359.2 |
| XP01        | ENST00000401558.2 |
| THAP11      | ENST00000303596.1 |
| SLC24A2     | ENST00000341998.2 |
| AL133373.1  | ENST00000596306.1 |
| SPIN2A      | ENST00000374908.1 |
| ADRB2       | ENST00000305988.4 |
| UBN1        | ENST00000262376.6 |
| WIPF2       | ENST00000323571.4 |
| EBF3        | ENST00000368648.3 |
| CMTM6       | ENST00000205636.3 |
| CD300LB     | ENST00000392621.1 |
| IFIT5       | ENST00000371795.4 |
| CD96        | ENST00000352690.4 |
| CCNY        | ENST00000374706.1 |
| NBPF14      | ENST00000369219.1 |
| ZNF485      | ENST00000361807.3 |
| ABHD17C     | ENST00000258884.4 |
| HOXA5       | ENST00000222726.3 |
| RNASE11     | ENST00000610205.1 |
| RAP2A       | ENST00000245304.4 |
| SIGLEC10    | ENST00000441969.3 |
| ANKRD27     | ENST00000306065.4 |
| CYFIP2      | ENST00000318218.6 |
| GJA5        | ENST00000271348.2 |
| AP000322.53 | ENST00000450895.1 |
| GLB1L2      | ENST00000339772.7 |
| C20orf96    | ENST00000382369.5 |
| USP14       | ENST00000261601.7 |
| TMEM173     | ENST00000330794.4 |
| DHX33       | ENST00000225296.3 |
| GRPEL2      | ENST00000416916.2 |
| STK32B      | ENST00000282908.5 |
| NBEAL1      | ENST00000449802.1 |
| PAQR4       | ENST00000318782.8 |

|            |                   |
|------------|-------------------|
| OPRK1      | ENST00000265572.3 |
| AC115618.1 | ENST00000376775.2 |
| KIAA0907   | ENST00000368320.3 |
| GPR83      | ENST00000243673.2 |
| EDA        | ENST00000374553.2 |
| MYH7B      | ENST00000262873.7 |
| GSTCD      | ENST00000515279.1 |
| BLMH       | ENST00000261714.6 |
| CD300C     | ENST00000330793.1 |
| PRKAB2     | ENST00000254101.3 |
| C3orf36    | ENST00000408895.2 |
| VN1R1      | ENST00000321039.3 |
| MAMDC2     | ENST00000377182.4 |
| KRT80      | ENST00000313234.5 |
| SPTLC1     | ENST00000262554.2 |
| B4GALT1    | ENST00000379731.4 |
| PLXDC1     | ENST00000315392.4 |
| DSC3       | ENST00000434452.1 |
| MLK4       | ENST00000366624.3 |
| SALL1      | ENST00000566102.1 |
| MAP3K3     | ENST00000361357.3 |
| GFPT2      | ENST00000253778.8 |
| AMER1      | ENST00000330258.3 |
| S100A14    | ENST00000476873.1 |
| PAMR1      | ENST00000278360.3 |
| SMYD1      | ENST00000419482.2 |
| KRT35      | ENST00000246639.2 |
| NAV1       | ENST00000295624.6 |
| MTMR10     | ENST00000435680.1 |
| PURG       | ENST00000475541.1 |
| CYB5D1     | ENST00000571846.1 |
| SPIN3      | ENST00000374919.3 |
| MYO1D      | ENST00000318217.5 |
| SLC25A28   | ENST00000370495.4 |
| C21orf62   | ENST00000536776.1 |
| TOM1       | ENST00000382034.5 |
| FREM1      | ENST00000380881.4 |
| MRGPRX2    | ENST00000329773.2 |
| TESPA1     | ENST00000524622.1 |
| C11orf68   | ENST00000438576.2 |
| C17orf58   | ENST00000536693.1 |
| PNCK       | ENST00000340888.3 |
| RACGAP1    | ENST00000427314.2 |
| MFAP5      | ENST00000359478.2 |
| LINS       | ENST00000561308.1 |
| NME1       | ENST00000511355.1 |
| DCTPP1     | ENST00000319285.4 |
| RFX4       | ENST00000229387.5 |
| HTR2A      | ENST00000378688.4 |
| AIM1       | ENST00000369066.3 |
| SRRM1      | ENST00000323848.9 |
| SLC35B4    | ENST00000378509.4 |
| PHKA1      | ENST00000373542.4 |
| PRDM5      | ENST00000515109.1 |

|               |                    |
|---------------|--------------------|
| CREBRF        | ENST00000540014. 1 |
| FAM174B       | ENST00000327355. 5 |
| HIST1H2BJ     | ENST00000541790. 1 |
| ENPP6         | ENST00000296741. 2 |
| STAC          | ENST00000273183. 3 |
| UTP14C        | ENST00000521776. 2 |
| ELMO2         | ENST00000290246. 6 |
| GPR97         | ENST00000333493. 4 |
| FAM110C       | ENST00000327669. 4 |
| CASC5         | ENST00000346991. 5 |
| IER5          | ENST00000367577. 4 |
| GTF2A1        | ENST00000553612. 1 |
| RCAN2         | ENST00000330430. 6 |
| ZC3H7A        | ENST00000396516. 2 |
| ATP2B3        | ENST00000370186. 1 |
| GLUD2         | ENST00000328078. 1 |
| TAF12         | ENST00000373824. 4 |
| SFT2D2        | ENST00000271375. 4 |
| BROX          | ENST00000537020. 1 |
| SIGLEC14      | ENST00000360844. 6 |
| DSTYK         | ENST00000367160. 4 |
| SNX29         | ENST00000566228. 1 |
| PGBD4         | ENST00000397766. 2 |
| BNC1          | ENST00000345382. 2 |
| ZNF80         | ENST00000482457. 2 |
| OAS2          | ENST00000392583. 2 |
| PLEKHA1       | ENST00000538022. 1 |
| NUAK1         | ENST00000261402. 2 |
| POLR3B        | ENST00000228347. 4 |
| UNC13A        | ENST00000519716. 2 |
| C1QTNF9B      | ENST00000382145. 1 |
| C9orf62       | ENST00000320778. 2 |
| MXRA5         | ENST00000217939. 6 |
| HLF           | ENST00000226067. 5 |
| TRIM32        | ENST00000373983. 2 |
| TWIST1        | ENST00000242261. 5 |
| SPON2         | ENST00000290902. 5 |
| CSNK1G1       | ENST00000303052. 7 |
| DGKA          | ENST00000551156. 1 |
| PAQR7         | ENST00000374296. 3 |
| TUFT1         | ENST00000368849. 3 |
| TOR1AIP1      | ENST00000606911. 2 |
| CTC-432M15. 3 | ENST00000514667. 1 |
| EFR3A         | ENST00000254624. 5 |
| ZNF584        | ENST00000599238. 1 |
| KPNA6         | ENST00000373625. 3 |
| TGOLN2        | ENST00000377386. 3 |
| CEP97         | ENST00000341893. 3 |
| SEC31B        | ENST00000370345. 3 |
| AP1M2         | ENST00000590923. 1 |
| SMYD5         | ENST00000389501. 4 |
| TMEM105       | ENST00000332900. 1 |
| DCAF10        | ENST00000242323. 7 |
| NEUROG3       | ENST00000242462. 4 |

|               |                   |
|---------------|-------------------|
| VIP           | ENST00000367244.3 |
| SEPT9         | ENST00000431235.2 |
| PEG3          | ENST00000423103.2 |
| KCNMB1        | ENST00000274629.4 |
| RORB          | ENST00000376896.3 |
| TNFSF13B      | ENST00000375887.4 |
| SLC35C2       | ENST00000372227.1 |
| ANXA4         | ENST00000394295.4 |
| LHX4          | ENST00000263726.2 |
| SNAPC3        | ENST00000380821.3 |
| SPHAR         | ENST00000366688.3 |
| RP11-181C3.1  | ENST00000501499.1 |
| CRISPLD2      | ENST00000262424.5 |
| FEZF2         | ENST00000486811.1 |
| FCF1          | ENST00000341162.4 |
| TAF5L         | ENST00000366676.1 |
| DDR1          | ENST00000446312.1 |
| MAP7          | ENST00000354570.3 |
| GJA9          | ENST00000454994.2 |
| SEC16A        | ENST00000313050.7 |
| NETO1         | ENST00000327305.6 |
| RAB22A        | ENST00000244040.3 |
| ENOPH1        | ENST00000273920.3 |
| LMLN          | ENST00000330198.4 |
| ZNF740        | ENST00000416904.3 |
| AIF1L         | ENST00000372300.1 |
| TBCEL         | ENST00000422003.2 |
| SRSF6         | ENST00000244020.3 |
| VWC2          | ENST00000340652.4 |
| AZGP1         | ENST00000411734.1 |
| FAM27E1       | ENST00000377525.1 |
| PAXIP1        | ENST00000404141.1 |
| RNF26         | ENST00000311413.4 |
| XKR8          | ENST00000373884.5 |
| RP11-204N11.1 | ENST00000555187.1 |
| MICU3         | ENST00000318063.5 |
| SAMHD1        | ENST00000262878.4 |
| TUBB6         | ENST00000591208.1 |
| LPHN2         | ENST00000370715.1 |
| EFEMP1        | ENST00000394555.2 |
| FLI1          | ENST00000527786.2 |
| EPGN          | ENST00000413830.1 |
| MCL1          | ENST00000369026.2 |
| KCNJ1         | ENST00000392665.2 |
| CWC25         | ENST00000225428.5 |
| DCAF4L1       | ENST00000333141.5 |
| ZNF878        | ENST00000547628.1 |
| IRF2BPL       | ENST00000238647.3 |
| PI15          | ENST00000260113.2 |
| RUFY1         | ENST00000377001.2 |
| PLEKHH1       | ENST00000329153.5 |
| DDX26B        | ENST00000370752.4 |
| SRL           | ENST00000399609.3 |
| SLX4IP        | ENST00000334534.5 |



|               |                   |
|---------------|-------------------|
| LOXL3         | ENST00000264094.3 |
| DDTL          | ENST00000215770.5 |
| MCPH1         | ENST00000519480.1 |
| PIGZ          | ENST00000412723.1 |
| NIPAL3        | ENST00000003912.3 |
| VMA21         | ENST00000330374.6 |
| CDIP1         | ENST00000564828.1 |
| LRCH1         | ENST00000311191.6 |
| MPP2          | ENST00000377184.3 |
| GNPNAT1       | ENST00000216410.3 |
| OTUD5         | ENST00000156084.4 |
| SPRED1        | ENST00000299084.4 |
| AP3B1         | ENST00000255194.6 |
| SLC7A11       | ENST00000280612.5 |
| TCTA          | ENST00000273590.3 |
| RP11-676J12.7 | ENST00000576252.1 |
| IL1RAP        | ENST00000072516.3 |
| APO00679.2    | ENST00000319763.1 |
| UBE2J2        | ENST00000347370.2 |
| EYA3          | ENST00000373871.3 |
| LILRA4        | ENST00000291759.4 |
| LDB1          | ENST00000361198.5 |
| BPNT1         | ENST00000322067.7 |
| NFE2L3        | ENST00000056233.3 |
| CELF1         | ENST00000395290.2 |
| SRPR          | ENST00000332118.6 |
| GNPDA1        | ENST00000311337.6 |
| TCF12         | ENST00000267811.5 |
| BLOC1S3       | ENST00000433642.2 |
| AJAP1         | ENST00000378191.4 |
| KIF4B         | ENST00000435029.4 |
| MEX3C         | ENST00000592416.1 |
| BCL2L1        | ENST00000376062.2 |
| TENM1         | ENST00000371130.3 |
| MAP2K1        | ENST00000307102.5 |
| FAM27E2       | ENST00000377529.1 |
| AMZ1          | ENST00000312371.4 |
| GK            | ENST00000378946.3 |
| CTDSP1        | ENST00000273062.2 |
| TMEM231       | ENST00000258173.6 |
| POLQ          | ENST00000264233.5 |
| NIN           | ENST00000389868.3 |
| TSPYL5        | ENST00000322128.3 |
| ZC3H6         | ENST00000343936.4 |
| CCDC180       | ENST00000395220.1 |
| FAM167A       | ENST00000284486.4 |
| AKAP17A       | ENST00000313871.3 |
| ARHGAP22      | ENST00000249601.4 |
| FGF5          | ENST00000456523.3 |
| N4BP2L2       | ENST00000267068.3 |
| PDE5A         | ENST00000354960.3 |
| SEMA4F        | ENST00000357877.2 |
| APPL1         | ENST00000288266.3 |
| INHBC         | ENST00000309668.2 |

|            |                   |
|------------|-------------------|
| ZNF202     | ENST00000336139.4 |
| PTGFRN     | ENST00000393203.2 |
| GLS        | ENST00000338435.4 |
| MOXD1      | ENST00000367963.3 |
| CDH6       | ENST00000265071.2 |
| TTC9       | ENST00000256367.2 |
| SYT1       | ENST00000457153.2 |
| WNT2B      | ENST00000369686.5 |
| NBPF3      | ENST00000318220.6 |
| PRRG3      | ENST00000370353.3 |
| AL590483.1 | ENST00000598000.1 |
| SNAP25     | ENST00000254976.2 |
| MYO5C      | ENST00000261839.7 |
| RHOU       | ENST00000366691.3 |
| PAAF1      | ENST00000544552.1 |
| CEACAM1    | ENST00000403444.3 |
| PTEN       | ENST00000371953.3 |
| C3orf72    | ENST00000383165.3 |
| LPHN3      | ENST00000512091.2 |
| S100Z      | ENST00000317593.4 |
| MAMSTR     | ENST00000318083.6 |
| CBX7       | ENST00000216133.5 |
| HOXD11     | ENST00000249504.5 |
| ZNF578     | ENST00000421239.2 |
| ZNF438     | ENST00000331737.6 |
| SLC18A3    | ENST00000374115.3 |
| ZNF619     | ENST00000447116.2 |
| FAM27E3    | ENST00000455764.2 |
| P4HB       | ENST00000331483.4 |
| STK4       | ENST00000372801.1 |
| FREM2      | ENST00000280481.7 |
| CCNT1      | ENST00000261900.3 |
| PPP1R10    | ENST00000376511.2 |
| PHYHIP     | ENST00000321613.3 |
| DNAH100S   | ENST00000514254.2 |
| ZSCAN25    | ENST00000394152.2 |
| KDELR2     | ENST00000258739.4 |
| CAMKV      | ENST00000296471.7 |
| SLC6A2     | ENST00000219833.8 |
| SLC22A5    | ENST00000245407.3 |
| GGT7       | ENST00000336431.5 |
| BBS10      | ENST00000393262.3 |
| ADORA2A    | ENST00000337539.7 |
| RNF185     | ENST00000326132.6 |
| TMPRSS2    | ENST00000332149.5 |
| PHYHIPL    | ENST00000373880.4 |
| STIM1      | ENST00000527651.1 |
| HM13       | ENST00000335574.5 |
| SERINC5    | ENST00000512721.1 |
| BRWD3      | ENST00000373275.4 |
| RFESD      | ENST00000513950.2 |
| DEDD       | ENST00000368006.3 |
| KIAA0408   | ENST00000483725.3 |
| ZNF662     | ENST00000541208.1 |

|                |                    |
|----------------|--------------------|
| C1orf85        | ENST00000362007.1  |
| CPEB4          | ENST00000265085.5  |
| SLC01C1        | ENST00000545604.1  |
| HID1           | ENST00000425042.2  |
| TMLHE          | ENST00000334398.3  |
| ARHGAP19-SLIT1 | ENST00000453547.2  |
| HTR4           | ENST00000377888.3  |
| NIPAL1         | ENST00000295461.5  |
| SLC25A42       | ENST00000318596.7  |
| ZNF562         | ENST00000293648.4  |
| TNS4           | ENST00000254051.6  |
| HS3ST3A1       | ENST00000284110.1  |
| SYT7           | ENST00000263846.4  |
| ZNF207         | ENST00000394670.4  |
| FAM64A         | ENST00000570337.2  |
| INSR           | ENST00000341500.5  |
| APAF1          | ENST00000333991.1  |
| NHLRC3         | ENST00000470258.1  |
| C2orf88        | ENST00000340623.4  |
| SRP19          | ENST00000282999.3  |
| RPL22          | ENST00000234875.4  |
| SEH1L          | ENST00000262124.11 |
| PGAP1          | ENST00000354764.4  |
| TMEM37         | ENST00000306406.4  |
| TMEM43         | ENST00000306077.4  |
| RPA1           | ENST00000254719.5  |
| HDGF           | ENST00000357325.5  |
| TFR2           | ENST00000431692.1  |
| FAM153C        | ENST00000398106.2  |
| MTHFSD         | ENST00000360900.6  |
| MACC1          | ENST00000400331.5  |
| CNTN1          | ENST00000551295.2  |
| ARHGAP27       | ENST00000532038.1  |
| MAPK4          | ENST00000592595.1  |
| AGPS           | ENST00000264167.4  |
| TNFRSF21       | ENST00000296861.2  |
| RBMS3          | ENST00000396583.3  |
| ZNF275         | ENST00000370251.3  |
| YWHAZ          | ENST00000395957.2  |
| KIAA0226       | ENST00000273582.5  |
| CD164          | ENST00000368961.5  |
| EPB41L5        | ENST00000443902.2  |
| ZBTB33         | ENST00000326624.2  |
| KLC2           | ENST00000394065.2  |
| TNRC6A         | ENST00000395799.3  |
| THSD7A         | ENST00000423059.4  |
| RAX            | ENST00000256852.7  |
| SNX22          | ENST00000325881.4  |
| TRPV6          | ENST00000359396.3  |
| C2orf194       | ENST00000453730.2  |
| ANGPT1         | ENST00000520734.1  |
| SDC4           | ENST00000372733.3  |
| TMA16          | ENST00000358572.5  |
| DDX20          | ENST00000369702.4  |

|           |                   |
|-----------|-------------------|
| HIST1H2AK | ENST00000330180.2 |
| FADS6     | ENST00000310226.6 |
| CD300LD   | ENST00000375352.1 |
| ZNF525    | ENST00000467003.1 |
| PCDH11Y   | ENST00000215473.6 |
| ABHD14B   | ENST00000461108.1 |
| EVC       | ENST00000382674.2 |
| PTPN7     | ENST00000367279.4 |
| CPNE5     | ENST00000244751.2 |
| USP35     | ENST00000529308.1 |
| ABCA10    | ENST00000416101.2 |
| KRT83     | ENST00000293670.3 |
| ING4      | ENST00000341550.4 |
| TECTA     | ENST00000392793.1 |
| C7orf65   | ENST00000408988.2 |
| SGTB      | ENST00000381007.4 |
| CLCN2     | ENST00000423355.2 |
| TMEM246   | ENST00000374847.1 |
| RGS17     | ENST00000367225.2 |
| LRRC58    | ENST00000295628.3 |
| NKD1      | ENST00000268459.3 |
| WDR36     | ENST00000506538.2 |
| KLRC3     | ENST00000381903.2 |
| IPP       | ENST00000396478.3 |
| DIAPH2    | ENST00000324765.8 |
| GGA2      | ENST00000309859.4 |
| SYNJ2BP   | ENST00000256366.4 |
| DTHD1     | ENST00000456874.2 |
| CIB2      | ENST00000258930.3 |
| CLEC1A    | ENST00000315330.4 |
| GPR114    | ENST00000340339.4 |
| TMEM214   | ENST00000238788.9 |
| CHRNA4    | ENST00000370263.4 |
| ACVRL1    | ENST00000550683.1 |
| CENPO     | ENST00000380834.2 |
| EML5      | ENST00000554922.1 |
| ORMDL1    | ENST00000392350.3 |
| ATMIN     | ENST00000299575.4 |
| CNOT8     | ENST00000285896.6 |
| LTBP1     | ENST00000404525.1 |
| FLT1      | ENST00000282397.4 |
| LRRTM2    | ENST00000274711.6 |
| SUSD5     | ENST00000309558.3 |
| F13A1     | ENST00000264870.3 |
| SNIP1     | ENST00000296215.6 |
| PLB1      | ENST00000422425.2 |
| SOCS3     | ENST00000330871.2 |
| ZNF774    | ENST00000354377.3 |
| NXNL2     | ENST00000375854.3 |
| ARHGEF2   | ENST00000368315.4 |
| SRP72     | ENST00000342756.5 |
| MANEA     | ENST00000358812.4 |
| CREBZF    | ENST00000398294.2 |
| PIGM      | ENST00000368090.2 |

|            |                   |
|------------|-------------------|
| GNB5       | ENST00000261837.7 |
| ZDHC18     | ENST00000374142.4 |
| ATP7A      | ENST00000343533.5 |
| RASA4      | ENST00000262940.7 |
| AC005481.5 | ENST00000409610.1 |
| YPEL2      | ENST00000312655.4 |
| FLJ20373   | ENST00000414004.2 |
| PAK2       | ENST00000327134.3 |
| KLK9       | ENST00000376832.4 |
| CXCR5      | ENST00000292174.4 |
| PMAIP1     | ENST00000316660.6 |
| RALBP1     | ENST00000383432.3 |
| IGSF3      | ENST00000369486.3 |
| PTCD3      | ENST00000254630.7 |
| SLC38A1    | ENST00000398637.5 |
| GAREM      | ENST00000399218.4 |
| ZBTB25     | ENST00000608382.1 |
| KLHL14     | ENST00000359358.4 |
| TMCC1      | ENST00000432054.2 |
| SNX10      | ENST00000396376.1 |
| TP53INP2   | ENST00000374810.3 |
| POLG       | ENST00000268124.5 |
| TCFL5      | ENST00000335351.3 |
| SLC34A1    | ENST00000324417.5 |
| FRMPD3     | ENST00000276185.4 |
| RAPGEFL1   | ENST00000264644.6 |
| FAM91A1    | ENST00000334705.7 |
| VANGL2     | ENST00000368061.2 |
| ENTPD1     | ENST00000371207.3 |
| NUP155     | ENST00000231498.3 |
| RNF157     | ENST00000269391.6 |
| PPM1A      | ENST00000395076.4 |
| FGF11      | ENST00000293829.4 |
| DUSP16     | ENST00000298573.4 |
| ATG5       | ENST00000360666.4 |
| NKX6-1     | ENST00000515820.2 |
| TLDC2      | ENST00000217320.3 |
| SPSB3      | ENST00000566339.1 |
| HLA-E      | ENST00000376630.4 |
| AIPL1      | ENST00000381129.3 |
| LHX9       | ENST00000367390.3 |
| USP26      | ENST00000370832.1 |
| KLF6       | ENST00000542957.1 |
| CYTH1      | ENST00000585509.1 |
| RNF208     | ENST00000392827.1 |
| TMOD2      | ENST00000249700.4 |
| ITGB8      | ENST00000222573.4 |
| DCK        | ENST00000504730.1 |
| CYLD       | ENST00000540145.1 |
| PTPLAD2    | ENST00000495827.2 |
| DCLRE1B    | ENST00000369563.3 |
| NADK2      | ENST00000397338.1 |
| ZNF703     | ENST00000331569.4 |
| SAMD4A     | ENST00000392067.3 |

|            |                   |
|------------|-------------------|
| NBPF10     | ENST00000369339.3 |
| TMEM236    | ENST00000377495.1 |
| ATP2A1     | ENST00000395503.4 |
| AC139426.2 | ENST00000435655.2 |
| SLC5A12    | ENST00000396005.3 |
| UHK1       | ENST00000538489.1 |
| ARHGEF4    | ENST00000392953.3 |
| TMEM236    | ENST00000480516.1 |
| EZH1       | ENST00000428826.2 |
| GPX8       | ENST00000296734.6 |
| NCKAP5     | ENST00000409261.1 |
| FAM222A    | ENST00000538780.1 |
| PIGN       | ENST00000357637.5 |
| ASAH1      | ENST00000262097.6 |
| IRF2BP2    | ENST00000366610.3 |
| YIPF3      | ENST00000372422.2 |
| RASSF3     | ENST00000542104.1 |
| SPPL3      | ENST00000353487.2 |
| GIPC2      | ENST00000370759.3 |
| PDE1B      | ENST00000243052.3 |
| KCNA2      | ENST00000485317.1 |
| CHRNA10    | ENST00000250699.2 |
| TRERF1     | ENST00000541110.1 |
| FBLIM1     | ENST00000375771.1 |
| SPECC1L    | ENST00000314328.9 |
| FERMT1     | ENST00000217289.4 |
| AC016722.1 | ENST00000409518.1 |
| CXCR2      | ENST00000318507.2 |
| NOX5       | ENST00000260364.5 |
| FAM110D    | ENST00000374268.3 |
| CLDN18     | ENST00000343735.4 |
| FUBP1      | ENST00000370767.1 |
| CHST7      | ENST00000276055.3 |
| STON2      | ENST00000267540.2 |
| EPHA7      | ENST00000369303.4 |
| ADCY7      | ENST00000394697.2 |
| NDST4      | ENST00000264363.2 |
| SYT13      | ENST0000020926.3  |
| ZSCAN22    | ENST00000329665.4 |
| C14orf180  | ENST00000557649.1 |
| GPRIN2     | ENST00000374314.4 |
| ZC3H11A    | ENST00000332127.4 |
| LILRB4     | ENST00000391736.1 |
| SAMD4B     | ENST00000314471.6 |
| RNF38      | ENST00000259605.6 |
| HUNK       | ENST00000270112.2 |
| KCTD2      | ENST00000322444.6 |
| PLXDC2     | ENST00000377252.4 |
| SRPX2      | ENST00000373004.3 |
| CTDSPL     | ENST00000443503.2 |
| TRIP12     | ENST00000283943.5 |
| PTPN21     | ENST00000328736.3 |
| ZMPSTE24   | ENST00000372759.3 |
| RAB3IL1    | ENST00000394836.2 |

|              |                   |
|--------------|-------------------|
| PSD3         | ENST00000327040.8 |
| KIF21A       | ENST00000361961.3 |
| SERPINB9     | ENST00000380698.4 |
| XYLT1        | ENST00000261381.6 |
| FUT9         | ENST00000302103.5 |
| IYD          | ENST00000344419.3 |
| SFXN3        | ENST00000393459.1 |
| KRT74        | ENST00000549343.1 |
| POU4F2       | ENST00000281321.3 |
| RASGRF2      | ENST00000265080.4 |
| C5orf42      | ENST00000508244.1 |
| PPP2R5E      | ENST00000337537.3 |
| AC021218.2   | ENST00000377722.2 |
| RAB5B        | ENST00000553116.1 |
| MAPK8        | ENST00000374182.3 |
| CNOT2        | ENST00000229195.3 |
| TRIM41       | ENST00000315073.5 |
| IL7R         | ENST00000343305.4 |
| MAK16        | ENST00000360128.6 |
| PDPN         | ENST00000294489.6 |
| PARD3B       | ENST00000406610.2 |
| PBRM1        | ENST00000356770.4 |
| OLIG1        | ENST00000382348.1 |
| CACNB1       | ENST00000394303.3 |
| FAM124A      | ENST00000322475.8 |
| SHISA2       | ENST00000319420.3 |
| CDH24        | ENST00000397359.3 |
| TRMT10A      | ENST00000394877.3 |
| KCNA6        | ENST00000433855.1 |
| TBX15        | ENST00000207157.3 |
| SUPT5H       | ENST00000599117.1 |
| SIX6         | ENST00000327720.5 |
| C3orf58      | ENST00000441925.2 |
| AKT1S1       | ENST00000391833.1 |
| BMP2K        | ENST00000335016.5 |
| CYB5R3       | ENST00000361740.4 |
| TCHP         | ENST00000405876.4 |
| CENPC        | ENST00000273853.6 |
| OTUD7B       | ENST00000369135.4 |
| POGK         | ENST00000367875.1 |
| RP11-126K1.2 | ENST00000447795.2 |
| PHF21A       | ENST00000257821.4 |
| ARRDC3       | ENST00000265138.3 |
| SYT5         | ENST00000590851.1 |
| HIATL1       | ENST00000428393.2 |
| HRH2         | ENST00000377291.2 |
| NPRL3        | ENST00000399953.3 |
| FBX040       | ENST00000338040.4 |
| GOLGA8A      | ENST00000360553.3 |
| ERC2         | ENST00000288221.6 |
| SERPINF2     | ENST00000382061.4 |
| TAPT1        | ENST00000405303.2 |
| IGF2R        | ENST00000356956.1 |
| VCL          | ENST00000372755.3 |

|                |                    |
|----------------|--------------------|
| STK10          | ENST00000176763.5  |
| ZNF398         | ENST00000420008.2  |
| C4orf33        | ENST00000281146.5  |
| UBXN2B         | ENST00000399598.2  |
| KBTBD13        | ENST00000432196.2  |
| CLSTN3         | ENST00000266546.6  |
| KCNJ8          | ENST00000240662.2  |
| SCYL3          | ENST00000367771.6  |
| FGFR10P        | ENST00000366847.4  |
| DCAF7          | ENST00000310827.4  |
| CAPZA1         | ENST00000263168.3  |
| ACVR1C         | ENST00000243349.8  |
| UPK1A          | ENST00000379013.2  |
| MAPK13         | ENST00000373766.5  |
| CCNI2          | ENST00000378731.1  |
| KIF5A          | ENST00000455537.2  |
| CHCHD5         | ENST00000409719.1  |
| MMP15          | ENST00000219271.3  |
| CRY2           | ENST00000443527.2  |
| TPM3           | ENST00000368531.2  |
| CCDC169-SOHLH2 | ENST00000511166.1  |
| UBXN7          | ENST00000296328.4  |
| SLC30A4        | ENST00000261867.4  |
| FRG1B          | ENST00000278882.3  |
| VASH2          | ENST00000366968.4  |
| NID2           | ENST00000216286.5  |
| BACH1          | ENST00000286800.3  |
| FBX032         | ENST00000517956.1  |
| GPR64          | ENST00000379873.2  |
| SNX11          | ENST00000393405.2  |
| NONO           | ENST00000276079.8  |
| ZNF549         | ENST00000376233.3  |
| ZNF776         | ENST00000317178.5  |
| FAM47E         | ENST00000515604.1  |
| NBPF9          | ENST00000440491.2  |
| PNMAL1         | ENST00000313683.10 |
| MPZ            | ENST00000533357.1  |
| RP11-385D13.1  | ENST00000455584.2  |
| SYT14          | ENST00000399639.2  |
| ATF2           | ENST00000487334.2  |
| HPSE           | ENST00000311412.5  |
| DYNLL2         | ENST00000579991.2  |
| MYO5A          | ENST00000399231.3  |
| ETV6           | ENST00000396373.4  |
| MDM2           | ENST00000462284.1  |
| SRCIN1         | ENST00000264659.7  |
| DDX39B         | ENST00000376177.2  |
| C9orf72        | ENST00000380003.3  |
| ARMCX6         | ENST00000361910.4  |
| NBPF16         | ENST00000417839.1  |
| KIAA0087       | ENST00000242109.3  |
| C2orf48        | ENST00000381786.3  |
| NBPF15         | ENST00000442702.2  |
| AP3B2          | ENST00000542200.1  |



|          |                   |
|----------|-------------------|
| SNX21    | ENST00000462307.1 |
| DNER     | ENST00000341772.4 |
| RTN4IP1  | ENST00000539449.1 |
| RANBP10  | ENST00000317506.3 |
| FAM124B  | ENST00000389874.3 |
| DHCR24   | ENST00000371269.3 |
| SKOR1    | ENST00000341418.5 |
| TRIP11   | ENST00000267622.4 |
| FBX022   | ENST00000308275.3 |
| NCOA3    | ENST00000341724.6 |
| RNF4     | ENST00000511859.1 |
| STX2     | ENST00000392373.2 |
| UNC5A    | ENST00000261961.3 |
| PEX5L    | ENST00000467460.1 |
| SCTR     | ENST00000019103.5 |
| APLN     | ENST00000307484.6 |
| GRM1     | ENST00000392299.2 |
| SEC14L3  | ENST00000215812.4 |
| TMEM151B | ENST00000451188.2 |
| TMEM143  | ENST00000293261.3 |
| CACUL1   | ENST00000369151.3 |
| RNF114   | ENST00000244061.2 |
| TTC37    | ENST00000358746.2 |
| CLIP1    | ENST00000361654.4 |
| ISY1     | ENST00000393292.3 |
| NSF      | ENST00000225282.8 |
| TMBIM6   | ENST00000423828.1 |
| AK3      | ENST00000381809.3 |
| BMP8A    | ENST00000331593.5 |
| TRIB1    | ENST00000311922.3 |
| C22orf26 | ENST00000396008.2 |
| GPC6     | ENST00000377047.4 |
| CDPF1    | ENST00000404744.1 |
| GOLM1    | ENST00000388712.3 |
| SNX12    | ENST00000374274.3 |
| SNCAIP   | ENST00000261368.8 |
| ARNT2    | ENST00000303329.4 |
| DSC1     | ENST00000257197.3 |
| RBM14    | ENST00000393979.3 |
| EIF2B3   | ENST00000360403.2 |
| ADAMTS9  | ENST00000295903.4 |
| SPAST    | ENST00000315285.3 |
| RNF217   | ENST00000521654.2 |
| RBM20    | ENST00000369519.3 |
| SPTLC2   | ENST00000216484.2 |
| LMO7     | ENST00000341547.4 |
| PCYT1A   | ENST00000292823.2 |
| TEX15    | ENST00000256246.2 |
| TMEM38B  | ENST00000374692.3 |
| GNA12    | ENST00000275364.3 |
| KIF26B   | ENST00000366518.4 |
| RAB6A    | ENST00000310653.6 |
| KLHL6    | ENST00000341319.3 |
| PURB     | ENST00000395699.2 |

|                |                    |
|----------------|--------------------|
| LMX1B          | ENST00000355497.5  |
| COL4A4         | ENST00000396625.3  |
| HMBOX1         | ENST00000397358.3  |
| SETDB2         | ENST00000354234.4  |
| PPP4R1L        | ENST00000334187.8  |
| BTB            | ENST00000303498.5  |
| CTD-2267D19.3  | ENST00000578774.1  |
| CCDC89         | ENST00000316398.3  |
| HOXD4          | ENST00000306324.3  |
| LASP1          | ENST00000318008.6  |
| LRP1           | ENST00000243077.3  |
| TBL2           | ENST00000305632.5  |
| HS3ST4         | ENST00000331351.5  |
| THNSL1         | ENST00000524413.1  |
| SLC6A17        | ENST00000331565.4  |
| NBEA           | ENST00000379939.2  |
| GABRA3         | ENST00000370314.4  |
| NPFFR1         | ENST00000277942.6  |
| PIK3R2         | ENST00000222254.8  |
| SYT2           | ENST00000367267.1  |
| FDXACB1        | ENST00000260257.4  |
| FNDC3B         | ENST00000336824.4  |
| LIN7A          | ENST00000552864.1  |
| CANX           | ENST00000247461.4  |
| RRP15          | ENST00000366932.3  |
| CHMP1B         | ENST00000526991.2  |
| CNTNAP2        | ENST00000361727.3  |
| TMEM256-PLSCR3 | ENST00000324822.11 |
| KIRREL         | ENST00000368172.1  |
| VPS4B          | ENST00000238497.5  |
| VAX1           | ENST00000369206.5  |
| PRMT2          | ENST00000458387.2  |
| CAMSAP1        | ENST00000389532.4  |
| RASSF7         | ENST00000397582.3  |
| SZT2           | ENST00000562955.1  |
| SHROOM3        | ENST00000296043.6  |
| YTHDF1         | ENST00000370339.3  |
| ABHD4          | ENST00000428304.2  |
| FLRT3          | ENST00000378053.3  |
| TSPAN5         | ENST00000305798.3  |
| DBT            | ENST00000370132.4  |
| LRG1           | ENST00000306390.6  |
| ESRP1          | ENST00000358397.5  |
| KLK10          | ENST00000309958.3  |
| DYM            | ENST00000442713.2  |
| SFXN1          | ENST00000321442.5  |
| CAB39L         | ENST00000355854.4  |
| TNRC6C         | ENST00000335749.4  |
| MED14          | ENST00000324817.1  |
| GPR20          | ENST00000377741.3  |
| TRAT1          | ENST00000295756.6  |
| ZNF620         | ENST00000314529.6  |
| ZHX3           | ENST00000309060.3  |
| ZNF529         | ENST00000334116.7  |

|          |                   |
|----------|-------------------|
| TBC1D20  | ENST00000354200.4 |
| CGN      | ENST00000271636.7 |
| NUP210   | ENST00000254508.5 |
| RNASEL   | ENST00000367559.3 |
| TNFRSF1B | ENST00000376259.3 |
| TOMM40L  | ENST00000367987.1 |
| PHB      | ENST00000300408.3 |
| CYP2W1   | ENST00000340150.6 |
| TIMP2    | ENST00000585421.1 |
| GOLGA7B  | ENST00000370602.1 |
| SBSPON   | ENST00000297354.6 |
| RUNX1T1  | ENST00000523629.1 |
| ZNF586   | ENST00000396150.4 |
| CAPRN2   | ENST00000395805.2 |
| C1orf226 | ENST00000458626.2 |
| ZNF75A   | ENST00000574298.1 |
| DSCAM    | ENST00000400454.1 |
| ZNF256   | ENST00000598928.1 |
| UBE2I    | ENST00000355803.4 |
| KLRC4    | ENST00000309384.1 |
| CPS1     | ENST00000430249.2 |
| RRP7A    | ENST00000323013.6 |
| GALNT13  | ENST00000409237.1 |
| PITPNA   | ENST00000313486.7 |
| RIPPLY3  | ENST00000329553.2 |
| PPP1R3E  | ENST00000452015.4 |
| FAM3A    | ENST00000434658.2 |
| C12orf60 | ENST00000330828.2 |
| PTPRG    | ENST00000474889.1 |
| ZBTB44   | ENST00000525842.1 |
| TET3     | ENST00000409262.3 |
| CLEC2D   | ENST00000261340.7 |
| GAN      | ENST00000568107.2 |
| WNT7B    | ENST00000339464.4 |
| EMX2     | ENST00000442245.4 |
| TMEM132B | ENST00000299308.3 |
| HS6ST2   | ENST00000370836.2 |
| PHF8     | ENST00000338946.6 |
| FAM153A  | ENST00000440605.3 |
| PHF15    | ENST00000402835.1 |
| RBM44    | ENST00000316997.4 |
| BCL9     | ENST00000234739.3 |
| GPRC5B   | ENST00000300571.2 |
| SHOX2    | ENST00000490689.2 |
| OCRL     | ENST00000371113.4 |
| GPR37L1  | ENST00000367282.5 |
| STYK1    | ENST00000075503.3 |
| FOXC1    | ENST00000380874.2 |
| SLC16A4  | ENST00000437429.2 |
| SLC15A4  | ENST00000266771.5 |
| ZNF687   | ENST00000368879.2 |
| DDX19B   | ENST00000288071.6 |
| LSM12    | ENST00000585388.1 |
| TMX3     | ENST00000299608.2 |

|            |                   |
|------------|-------------------|
| NXN        | ENST00000575801.1 |
| GPATCH8    | ENST00000591680.1 |
| PAIP2B     | ENST00000244221.8 |
| TRABD2A    | ENST00000409133.1 |
| CLCN4      | ENST00000380833.4 |
| KIAA1024L  | ENST00000564719.1 |
| ADH1B      | ENST00000305046.8 |
| KCNAB3     | ENST00000303790.2 |
| ARNTL      | ENST00000389708.3 |
| ANO3       | ENST00000256737.3 |
| CCR5       | ENST00000292303.4 |
| TDRD1      | ENST00000251864.2 |
| MFJ        | ENST00000304593.9 |
| EPM2A      | ENST00000367519.3 |
| NFATC2     | ENST00000371564.3 |
| CDKL2      | ENST00000429927.2 |
| AVPR1A     | ENST00000299178.2 |
| C11orf74   | ENST00000534635.1 |
| TIMM13     | ENST00000215570.3 |
| FAM96A     | ENST00000557835.1 |
| RAB23      | ENST00000317483.3 |
| RTN3       | ENST00000339997.4 |
| TTC13      | ENST00000366661.4 |
| UBE3B      | ENST00000434735.2 |
| P2RY1      | ENST00000305097.3 |
| SIPA1L3    | ENST00000222345.6 |
| CBFA2T2    | ENST00000375279.2 |
| TRIM71     | ENST00000383763.5 |
| SEMA4A     | ENST00000368282.1 |
| TMEM30B    | ENST00000555868.1 |
| RBAK       | ENST00000396912.1 |
| HLTF       | ENST00000465259.1 |
| SPATA13    | ENST00000382108.3 |
| JAZF1      | ENST00000283928.5 |
| A1CF       | ENST00000374001.2 |
| RAB15      | ENST00000436278.2 |
| IMPAD1     | ENST00000262644.4 |
| C2orf72    | ENST00000373640.4 |
| LRRD1      | ENST00000343318.5 |
| ACTR2      | ENST00000260641.5 |
| TMEM19     | ENST00000266673.5 |
| MUC1       | ENST00000457295.2 |
| ARHGEF9    | ENST00000253401.6 |
| PHACTR3    | ENST00000359926.3 |
| WDR31      | ENST00000341761.4 |
| RGS7BP     | ENST00000334025.2 |
| BTN3A3     | ENST00000244519.2 |
| TP53AIP1   | ENST00000602346.1 |
| AC079602.1 | ENST00000539163.1 |
| ENOSF1     | ENST00000383578.3 |
| SPOPL      | ENST00000280098.4 |
| MCAM       | ENST00000392814.1 |
| AS3MT      | ENST00000369880.3 |
| PGR        | ENST00000325455.5 |

|          |                   |
|----------|-------------------|
| C11orf58 | ENST00000228136.4 |
| ZNF148   | ENST00000360647.4 |
| NCS1     | ENST00000372398.3 |
| SAMD8    | ENST00000372687.4 |
| CDYL     | ENST00000343762.5 |
| OXSR1    | ENST00000311806.3 |
| MED9     | ENST00000268711.3 |
| FKTN     | ENST00000223528.2 |
| ZCCHC16  | ENST00000340433.2 |
| ZNF320   | ENST00000391781.2 |
| SNX20    | ENST00000330943.4 |
| TBC1D22B | ENST00000373491.3 |
| AGL      | ENST00000370161.2 |
| IKBKE    | ENST00000367120.3 |
| ADCK2    | ENST00000072869.4 |
| C21orf90 | ENST00000354333.5 |
| USP6NL   | ENST00000609104.1 |
| POMT1    | ENST00000423007.1 |
| CTDSPL2  | ENST00000260327.4 |
| ELL      | ENST00000262809.4 |
| HIPK2    | ENST00000406875.3 |
| CRB1     | ENST00000367400.3 |
| RPTOR    | ENST00000306801.3 |
| COPA     | ENST00000368069.3 |
| SWAP70   | ENST00000318950.6 |
| TMEM45B  | ENST00000281441.3 |
| LUZP1    | ENST00000418342.1 |
| SIGLEC11 | ENST00000447370.2 |
| PIGR     | ENST00000356495.4 |
| DUOXA1   | ENST00000558996.1 |
| HOXC12   | ENST00000243103.3 |
| HSD3B7   | ENST00000353250.5 |
| RGS16    | ENST00000367558.5 |
| DDHD2    | ENST00000397166.2 |
| PHF13    | ENST00000377648.4 |
| ADM2     | ENST00000395738.2 |
| CALD1    | ENST00000361388.2 |
| FZD2     | ENST00000315323.3 |
| SCUBE3   | ENST00000274938.7 |
| ATP6V1G1 | ENST00000374050.3 |
| CLCN5    | ENST00000376088.3 |
| SLFN5    | ENST00000299977.4 |
| SOGA3    | ENST00000556132.1 |
| CNTF     | ENST00000361987.4 |
| RABGAP1  | ENST00000373647.4 |
| BCL9L    | ENST00000334801.3 |
| EGLN1    | ENST00000366641.3 |
| VENTX    | ENST00000325980.9 |
| TP53I11  | ENST00000395648.3 |
| TAF4B    | ENST00000269142.5 |
| SLC39A13 | ENST00000524928.1 |
| FGFR2    | ENST00000369061.4 |
| STAG2    | ENST00000371160.1 |
| C15orf38 | ENST00000357484.5 |

|           |                   |
|-----------|-------------------|
| CANT1     | ENST00000392446.5 |
| PARP14    | ENST00000474629.2 |
| CMPK2     | ENST00000256722.5 |
| SEC61A2   | ENST00000379020.4 |
| OS9       | ENST00000389142.5 |
| RPS6KA6   | ENST00000262752.2 |
| CEP350    | ENST00000367607.3 |
| SOX5      | ENST00000546136.1 |
| KANSL1    | ENST00000574590.1 |
| GPR180    | ENST00000376958.4 |
| ADHFE1    | ENST00000396623.3 |
| EGFLAM    | ENST00000322350.5 |
| DDX11     | ENST00000251758.5 |
| CORO6     | ENST00000388767.3 |
| MPP6      | ENST00000222644.5 |
| CLIP3     | ENST00000360535.4 |
| PCSK7     | ENST00000320934.3 |
| KRT38     | ENST00000246646.3 |
| PLCD1     | ENST00000463876.1 |
| ABLIM1    | ENST00000392952.3 |
| PKDREJ    | ENST00000253255.5 |
| PAX8      | ENST00000263335.7 |
| RAD54L2   | ENST00000409535.2 |
| EARS2     | ENST00000449606.1 |
| SLC7A5    | ENST00000565644.1 |
| SGK494    | ENST00000301037.5 |
| FAM134C   | ENST00000309428.5 |
| ZC3H13    | ENST00000242848.4 |
| ADNP2     | ENST00000262198.4 |
| ZNF142    | ENST00000449707.1 |
| LIPH      | ENST00000296252.4 |
| OTUD6B    | ENST00000285420.4 |
| MFSD9     | ENST00000258436.5 |
| TTC14     | ENST00000412756.2 |
| HEXIM1    | ENST00000332499.2 |
| COA1      | ENST00000395879.1 |
| ZNF317    | ENST00000247956.6 |
| ARL5B     | ENST00000377275.3 |
| CDON      | ENST00000392693.3 |
| ZNF510    | ENST00000375231.1 |
| IKZF1     | ENST00000331340.3 |
| HIF1AN    | ENST00000299163.6 |
| C17orf103 | ENST00000468196.1 |
| KIF21B    | ENST00000332129.2 |
| ADRB3     | ENST00000345060.3 |
| CAPN6     | ENST00000324068.1 |
| ZNF621    | ENST00000339296.5 |
| MYBL1     | ENST00000522677.3 |
| LAMB4     | ENST00000205386.4 |
| CSNK1G2   | ENST00000255641.8 |
| IKBKG     | ENST00000393549.2 |
| C18orf63  | ENST00000579455.1 |
| ZNF534    | ENST00000301085.4 |
| MAVS      | ENST00000428216.2 |

|            |                   |
|------------|-------------------|
| HEBP2      | ENST00000607197.1 |
| ANKRD52    | ENST00000267116.7 |
| FBXL20     | ENST00000394294.3 |
| WAPAL      | ENST00000298767.5 |
| OTUD3      | ENST00000375120.3 |
| KCTD12     | ENST00000377474.2 |
| SLC35C1    | ENST00000314134.3 |
| CHTOP      | ENST00000368694.3 |
| UGT3A1     | ENST00000274278.3 |
| MAFB       | ENST00000373313.2 |
| ZNF501     | ENST00000396048.2 |
| NLN        | ENST00000380985.5 |
| SRI        | ENST00000265729.2 |
| MROH6      | ENST00000398882.3 |
| CRAMP1L    | ENST00000397412.3 |
| ZNF678     | ENST00000343776.5 |
| ALG6       | ENST00000371108.4 |
| CCDC3      | ENST00000378825.3 |
| ZFYVE1     | ENST00000318876.5 |
| CDS1       | ENST00000295887.5 |
| GATA4      | ENST00000335135.4 |
| FAM131B    | ENST00000443739.2 |
| EIF4G2     | ENST00000526148.1 |
| ZNF512     | ENST00000355467.4 |
| MAU2       | ENST00000262815.8 |
| AP5B1      | ENST00000532090.2 |
| RBL1       | ENST00000373664.3 |
| ELOVL2     | ENST00000354666.3 |
| CYTH3      | ENST00000350796.3 |
| IGFBP5     | ENST00000233813.4 |
| C2CD4B     | ENST00000380392.3 |
| C1orf116   | ENST00000359470.5 |
| USP31      | ENST00000219689.7 |
| KIAA0355   | ENST00000299505.6 |
| HECTD3     | ENST00000372168.3 |
| LSM11      | ENST00000286307.5 |
| FOSL2      | ENST00000379619.1 |
| SLC16A2    | ENST00000587091.1 |
| ZNF268     | ENST00000542986.2 |
| AC016559.1 | ENST00000594347.1 |
| KIF24      | ENST00000402558.2 |
| KLHL18     | ENST00000232766.5 |
| RBM41      | ENST00000372487.1 |
| MED1       | ENST00000300651.6 |
| ATP11A     | ENST00000487903.1 |
| YBEY       | ENST00000397701.4 |
| PXDN       | ENST00000252804.4 |
| TAC01      | ENST00000258975.6 |
| MED22      | ENST00000344469.5 |
| FAM84B     | ENST00000304916.3 |
| C1orf95    | ENST00000366788.3 |
| RCOR1      | ENST00000262241.6 |
| BRI3BP     | ENST00000341446.8 |
| ST6GAL1    | ENST00000169298.3 |

|           |                   |
|-----------|-------------------|
| AARD      | ENST00000378279.3 |
| ARID4A    | ENST00000431317.2 |
| C17orf102 | ENST00000357754.1 |
| C19orf54  | ENST00000470681.1 |
| CXCR6     | ENST00000304552.4 |
| EIF4E3    | ENST00000425534.3 |
| TSGA10    | ENST00000393483.3 |
| TMEM108   | ENST00000321871.6 |
| TRRAP     | ENST00000359863.4 |
| MIOS      | ENST00000340080.4 |
| ZNF611    | ENST00000543227.1 |
| RIMS2     | ENST00000507740.1 |
| APOOL     | ENST00000373173.2 |
| RAD9A     | ENST00000307980.2 |
| CD22      | ENST00000544992.2 |
| RPL12     | ENST00000361436.5 |
| ZBTB21    | ENST00000398505.3 |
| TAF4      | ENST00000252996.4 |
| DIEXF     | ENST00000491415.2 |
| IDE       | ENST00000265986.6 |
| FAF1      | ENST00000396153.2 |
| DIABLO    | ENST00000413918.1 |
| C2orf54   | ENST00000402775.2 |
| ZNF526    | ENST00000301215.3 |
| EPB42     | ENST00000300215.3 |
| SLC25A34  | ENST00000294454.5 |
| GPATCH11  | ENST00000409774.1 |
| ZNF804B   | ENST00000333190.4 |
| C14orf177 | ENST00000325812.2 |
| NBPF12    | ENST00000446760.2 |
| NYNRIN    | ENST00000382554.3 |
| BSN       | ENST00000296452.4 |
| AOC3      | ENST00000591562.1 |
| C6orf141  | ENST00000529246.2 |
| GATAD2A   | ENST00000360315.3 |
| STXBP4    | ENST00000376352.2 |
| LIMD1     | ENST00000273317.4 |
| DLGAP4    | ENST00000373913.3 |
| USH2A     | ENST00000307340.3 |
| PRR20D    | ENST00000452123.3 |
| ZNF300    | ENST00000427179.1 |
| SLC6A14   | ENST00000371900.4 |
| LY6G5B    | ENST00000375864.4 |
| PRR20A    | ENST00000377931.1 |
| PRR20C    | ENST00000544357.2 |
| ZYG11B    | ENST00000294353.6 |
| PRR20E    | ENST00000434815.1 |
| GRAMD1C   | ENST00000358160.4 |
| PDE4A     | ENST00000380702.2 |
| PCDH17    | ENST00000377918.3 |
| ICOS      | ENST00000435193.1 |
| PRR20B    | ENST00000377930.1 |
| IFFO2     | ENST00000455833.2 |
| PAPD7     | ENST00000230859.6 |



|          |                   |
|----------|-------------------|
| N4BP1    | ENST00000262384.3 |
| UBA6     | ENST00000322244.5 |
| OLFM4    | ENST00000219022.2 |
| INO80    | ENST00000361937.3 |
| PODXL    | ENST00000541194.1 |
| C12orf66 | ENST00000544871.1 |
| TUBB4A   | ENST00000264071.2 |
| LPPR4    | ENST00000370185.3 |
| SYTL5    | ENST00000357972.5 |
| AR       | ENST00000374690.3 |
| NBPF11   | ENST00000604938.1 |
| PPFIA2   | ENST00000549396.1 |
| TLK1     | ENST00000431350.2 |
| FOXK1    | ENST00000328914.4 |
| FAM212B  | ENST00000357260.5 |
| ZFYVE16  | ENST00000338008.5 |
| ABHD17A  | ENST00000590661.1 |
| DNAJC10  | ENST00000264065.7 |
| MED13L   | ENST00000281928.3 |
| MS4A15   | ENST00000337911.4 |
| ISLR     | ENST00000249842.3 |
| SLC4A5   | ENST00000423644.1 |
| FAM216B  | ENST00000537894.1 |
| ALOXE3   | ENST00000380149.1 |
| ALPK3    | ENST00000258888.5 |
| MEF2A    | ENST00000354410.5 |
| TMEM245  | ENST00000374586.3 |
| F9       | ENST00000218099.2 |
| ATXN7L3  | ENST00000454077.2 |
| LCN10    | ENST00000497771.1 |
| SCCPDH   | ENST00000366510.3 |
| FAM199X  | ENST00000493442.1 |
| SHE      | ENST00000304760.2 |
| VKORC1L1 | ENST00000360768.3 |
| SERTAD1  | ENST00000357949.4 |
| PACS1    | ENST00000320580.4 |
| DLX2     | ENST00000234198.4 |
| TNFSF15  | ENST00000374045.4 |
| CHRN4    | ENST00000261751.3 |
| KIAA0247 | ENST00000342745.4 |
| EDNRB    | ENST00000377211.4 |
| NBPF1    | ENST00000430580.2 |
| SERAC1   | ENST00000367102.2 |
| SLC9A7   | ENST00000328306.4 |
| MGAT4A   | ENST00000264968.3 |
| ALDH3A2  | ENST00000339618.4 |
| DDA1     | ENST00000359866.4 |
| GUCY1A2  | ENST00000526355.2 |
| SLC7A6OS | ENST00000263997.6 |
| FAM129A  | ENST00000367511.3 |
| C22orf39 | ENST00000399562.4 |
| KHSRP    | ENST00000398148.3 |
| DCT      | ENST00000377028.5 |
| TNXB     | ENST00000375244.3 |

|                |                   |
|----------------|-------------------|
| RBM48          | ENST00000481551.1 |
| MEOX1          | ENST00000329168.3 |
| DPY19L1        | ENST00000310974.4 |
| PIGK           | ENST00000370812.3 |
| LRRC3          | ENST00000291592.4 |
| FAM169A        | ENST00000380515.3 |
| ZNF35          | ENST00000396056.2 |
| C19orf25       | ENST00000588849.1 |
| DMGDH          | ENST00000380311.4 |
| CSTF1          | ENST00000217109.4 |
| TIMP4          | ENST00000287814.4 |
| RNGTT          | ENST00000369485.4 |
| CDC25C         | ENST00000323760.6 |
| PCDHGA11       | ENST00000398587.2 |
| PCDHGB6        | ENST00000520790.1 |
| RXRB           | ENST00000374685.4 |
| PTPRS          | ENST00000372412.4 |
| KANSL1L        | ENST00000281772.9 |
| CTD-2368P22.1  | ENST00000550135.1 |
| PCDHGB7        | ENST00000398594.2 |
| PCDHGA4        | ENST00000571252.1 |
| ZPLD1          | ENST00000306176.1 |
| PIM2           | ENST00000376509.4 |
| HCAR2          | ENST00000328880.5 |
| TTBK2          | ENST00000267890.6 |
| CASC3          | ENST00000264645.7 |
| PCDHGB2        | ENST00000522605.1 |
| IL17D          | ENST00000304920.3 |
| SLC01A2        | ENST00000307378.6 |
| GDPD5          | ENST00000443276.2 |
| CLIP2          | ENST00000223398.6 |
| PCDHGA1        | ENST00000517417.1 |
| PCDHGB3        | ENST00000576222.1 |
| MED13          | ENST00000397786.2 |
| PCDHGB4        | ENST00000519479.1 |
| PCDHGA5        | ENST00000518069.1 |
| PCDHGB1        | ENST00000523390.1 |
| TOLLIP         | ENST00000317204.6 |
| MASP1          | ENST00000296280.6 |
| MED20          | ENST00000409312.1 |
| PCF11          | ENST00000298281.4 |
| FBX042         | ENST00000375592.3 |
| CTD-2207023.12 | ENST00000599312.1 |
| CDK5R1         | ENST00000313401.3 |
| SKIL           | ENST00000458537.3 |
| SLC8A1         | ENST00000406785.2 |
| PPARGC1B       | ENST00000309241.5 |
| KMT2A          | ENST00000534358.1 |
| NF2            | ENST00000347330.5 |
| PCDHGA3        | ENST00000253812.6 |
| TRAF1          | ENST00000373887.3 |
| PCDHGC3        | ENST00000308177.3 |
| AC174470.1     | ENST00000457257.1 |
| PCDHGA12       | ENST00000252085.3 |

|            |                   |
|------------|-------------------|
| PCDHGA6    | ENST00000517434.1 |
| RIN2       | ENST00000255006.6 |
| PDGFRA     | ENST00000257290.5 |
| CNGB3      | ENST00000320005.5 |
| CCDC85A    | ENST00000407595.2 |
| MTA2       | ENST00000278823.2 |
| MVB12B     | ENST00000361171.3 |
| UBE3C      | ENST00000348165.5 |
| PCDHGA9    | ENST00000573521.1 |
| PARP16     | ENST00000261888.6 |
| PCDHGA7    | ENST00000518325.1 |
| PCDHGA2    | ENST00000394576.2 |
| TADA3      | ENST00000301964.2 |
| PCDHGA8    | ENST00000398604.2 |
| LGI3       | ENST00000306317.2 |
| PATL1      | ENST00000300146.9 |
| SLC35A3    | ENST00000465289.1 |
| DPP8       | ENST00000341861.5 |
| CBLB       | ENST00000264122.4 |
| SCUBE2     | ENST00000457346.2 |
| GINS4      | ENST00000523277.2 |
| TTC9C      | ENST00000316461.4 |
| HLA-DOB    | ENST00000438763.2 |
| SPSB1      | ENST00000328089.6 |
| RBM23      | ENST00000555209.1 |
| ENSA       | ENST00000369014.5 |
| PPP1R7     | ENST00000234038.6 |
| TLX2       | ENST00000233638.7 |
| PCDHGA10   | ENST00000398610.2 |
| RALGPS2    | ENST00000367635.3 |
| MFAP2      | ENST00000375534.3 |
| JPH3       | ENST00000284262.2 |
| RGAG4      | ENST00000545866.1 |
| PCDHGC4    | ENST00000306593.1 |
| PCDHGC5    | ENST00000252087.1 |
| ENTPD3     | ENST00000301825.3 |
| CXADR      | ENST00000356275.6 |
| FBXW8      | ENST00000455858.2 |
| STRIP1     | ENST00000369795.3 |
| DCTN5      | ENST00000300087.2 |
| SALL4      | ENST00000217086.4 |
| AP000867.1 | ENST00000343767.3 |
| HLA-DPA1   | ENST00000419277.1 |
| C9orf66    | ENST00000382387.2 |
| TXLNA      | ENST00000373610.3 |
| ENDOD1     | ENST00000278505.4 |
| DUSP2      | ENST00000288943.4 |
| AFAP1L1    | ENST00000296721.4 |
| CLMN       | ENST00000298912.4 |
| MMAA       | ENST00000281317.5 |
| AFF2       | ENST00000370460.2 |
| VTI1A      | ENST00000393077.2 |
| CALCOCO2   | ENST00000258947.3 |
| CHD4       | ENST00000544484.1 |

|          |                    |
|----------|--------------------|
| YKT6     | ENST00000223369.2  |
| HCAR3    | ENST00000528880.2  |
| TUSC5    | ENST00000333813.3  |
| CDCA7L   | ENST00000356195.5  |
| SLC26A9  | ENST00000367135.3  |
| ANO1     | ENST00000355303.5  |
| IFNE     | ENST00000448696.3  |
| RPS17L   | ENST00000561157.1  |
| RPS17    | ENST00000559187.1  |
| GGA1     | ENST00000343632.4  |
| SRRD     | ENST00000215917.7  |
| DPYSL3   | ENST00000398514.3  |
| ANTXR2   | ENST00000403729.2  |
| ZNF28    | ENST00000438150.2  |
| ZFP37    | ENST00000374227.3  |
| DLG3     | ENST00000194900.4  |
| TBX18    | ENST00000369663.5  |
| COX6B1   | ENST00000246554.3  |
| SRGAP1   | ENST00000355086.3  |
| FBLN5    | ENST00000267620.10 |
| ZMYM2    | ENST00000382869.3  |
| PTCD2    | ENST00000380639.5  |
| SHROOM4  | ENST00000376020.2  |
| AQP7     | ENST00000537089.1  |
| SV2B     | ENST00000394232.1  |
| APH1A    | ENST00000360244.4  |
| EFTUD2   | ENST00000426333.2  |
| ACER1    | ENST00000301452.4  |
| UNC80    | ENST00000439458.1  |
| BPHL     | ENST00000380368.2  |
| ZNF467   | ENST00000302017.3  |
| TRADD    | ENST00000345057.4  |
| ARMC5    | ENST00000457010.2  |
| PRELP    | ENST00000343110.2  |
| AP2M1    | ENST00000382456.3  |
| TNNI1    | ENST00000361379.4  |
| UACA     | ENST00000322954.6  |
| ENTPD5   | ENST00000334696.6  |
| DBNL     | ENST00000494774.1  |
| SEPT11   | ENST00000264893.6  |
| SMIM13   | ENST00000416247.2  |
| FAM111B  | ENST00000411426.1  |
| CX3CL1   | ENST0000006053.6   |
| PPP3R1   | ENST00000234310.3  |
| IRAK1BP1 | ENST00000369940.2  |
| KLHL7    | ENST00000339077.5  |
| SUFU     | ENST00000369902.3  |
| CES2     | ENST00000317091.4  |
| GEN1     | ENST00000381254.2  |
| VAMP7    | ENST00000286448.6  |
| IPO9     | ENST00000361565.4  |
| CNOT6    | ENST00000393356.1  |
| ITGA9    | ENST00000264741.5  |
| DAAM2    | ENST00000538976.1  |

|            |                   |
|------------|-------------------|
| NUMA1      | ENST00000351960.6 |
| PIPOX      | ENST00000323372.4 |
| SRRM4      | ENST00000267260.4 |
| H2AFV      | ENST00000381124.5 |
| H6PD       | ENST00000377403.2 |
| DDX18      | ENST00000263239.2 |
| C17orf72   | ENST00000580752.1 |
| TTC39A     | ENST00000530004.1 |
| SETBP1     | ENST00000282030.5 |
| YIPF4      | ENST00000238831.4 |
| KIAA1958   | ENST00000337530.6 |
| LONRF3     | ENST00000304778.7 |
| NOL12      | ENST00000359114.4 |
| FAM196B    | ENST00000377365.3 |
| G3BP1      | ENST00000394123.3 |
| COL9A2     | ENST00000372748.3 |
| PRKG1      | ENST00000373985.1 |
| MYOCD      | ENST00000425538.1 |
| ZNF609     | ENST00000326648.3 |
| SEZ6L      | ENST00000360929.3 |
| CAND2      | ENST00000456430.2 |
| AC010327.2 | ENST00000598855.1 |
| GGPS1      | ENST00000282841.5 |
| GABRE      | ENST00000370325.1 |
| ARPP19     | ENST00000566423.1 |
| TNPO2      | ENST00000425528.1 |
| RNF115     | ENST00000369291.5 |
| TBRG1      | ENST00000441174.3 |
| PHLDB1     | ENST00000361417.2 |
| PARP8      | ENST00000503750.2 |
| PRICKLE1   | ENST00000455697.1 |
| CLCC1      | ENST00000356970.2 |
| NAV2       | ENST00000360655.4 |
| RELA       | ENST00000525693.1 |
| CNTLN      | ENST00000380641.4 |
| NDC1       | ENST00000540001.1 |
| ZFH3       | ENST00000268489.5 |
| NLRP10     | ENST00000328600.2 |
| PROSER2    | ENST00000277570.5 |
| C14orf119  | ENST00000319074.4 |
| TMTC3      | ENST00000266712.6 |
| METTL20    | ENST00000357721.3 |
| WNT2       | ENST00000265441.3 |
| LRRC38     | ENST00000376085.3 |
| ANO5       | ENST00000324559.8 |
| TMEM86A    | ENST00000280734.2 |
| BBC3       | ENST00000341983.4 |
| MT1A       | ENST00000290705.8 |
| SRSF10     | ENST00000343255.5 |
| PDRG1      | ENST00000202017.4 |
| ZDHHC20    | ENST00000320220.9 |
| FMNL3      | ENST00000335154.5 |
| LGALS3BP   | ENST00000591778.1 |
| SP2        | ENST00000376741.4 |

|               |                   |
|---------------|-------------------|
| ABCF2         | ENST00000287844.2 |
| DNM1L         | ENST00000452533.2 |
| PRKD3         | ENST00000379066.1 |
| RNF40         | ENST00000324685.6 |
| RPGRIP1L      | ENST00000262135.4 |
| HDAC4         | ENST00000345617.3 |
| C11orf48      | ENST00000354588.3 |
| KIF5C         | ENST00000435030.1 |
| SHOX          | ENST00000381578.1 |
| CDRT4         | ENST00000312177.6 |
| EIF4B         | ENST00000262056.9 |
| MBD3          | ENST00000590550.2 |
| TCF4          | ENST00000354452.3 |
| BCLAF1        | ENST00000531224.1 |
| VPS53         | ENST00000437048.2 |
| PBX1          | ENST00000367897.1 |
| GRWD1         | ENST00000253237.5 |
| BET1L         | ENST00000325147.9 |
| CTD-2140B24.4 | ENST00000540096.2 |
| PEX26         | ENST00000329627.7 |
| TMEM65        | ENST00000297632.6 |
| QTRTD1        | ENST00000281273.4 |
| TOR1B         | ENST00000259339.2 |
| MB21D2        | ENST00000392452.2 |
| EOGT          | ENST00000383701.3 |
| PTK6          | ENST00000217185.2 |
| SCAI          | ENST00000336505.6 |
| RNF220        | ENST00000372247.2 |
| PRDM15        | ENST00000422911.1 |
| HHAT          | ENST00000413764.2 |
| ADAT2         | ENST00000606514.1 |
| ZBTB39        | ENST00000300101.2 |
| SPATA18       | ENST00000295213.4 |
| KIAA1257      | ENST00000265068.5 |
| ZBTB43        | ENST00000449886.1 |
| KDM8          | ENST00000380948.2 |
| TRPM6         | ENST00000360774.1 |
| CDCP2         | ENST00000371330.1 |
| PLEKHA6       | ENST00000272203.3 |
| PIGO          | ENST00000298004.5 |
| FBX048        | ENST00000377957.3 |
| GATAD2B       | ENST00000368655.4 |
| NRG2          | ENST00000394770.1 |
| FAM102A       | ENST00000373095.1 |
| UTRN          | ENST00000367545.3 |
| BTBD7         | ENST00000334746.5 |
| ZDHHC3        | ENST00000296127.3 |
| HOXA13        | ENST00000222753.4 |
| GRB10         | ENST00000398812.2 |
| SNX8          | ENST00000222990.3 |
| CD28          | ENST00000324106.8 |
| PSMG1         | ENST00000331573.3 |
| DTX3L         | ENST00000296161.4 |
| FIGN          | ENST00000333129.3 |

|               |                   |
|---------------|-------------------|
| NUP35         | ENST00000295119.4 |
| SERINC2       | ENST00000373709.3 |
| BIRC3         | ENST00000532808.1 |
| SEMA6D        | ENST00000355997.3 |
| SLC34A2       | ENST00000382051.3 |
| C10orf105     | ENST00000441508.2 |
| KIAA1045      | ENST00000242315.3 |
| SMUG1         | ENST00000505128.1 |
| PAN3          | ENST00000282391.5 |
| DPPA3         | ENST00000345088.2 |
| NEMF          | ENST00000298310.5 |
| ZDHHC2        | ENST00000262096.8 |
| ZBTB8B        | ENST00000609129.1 |
| ZNF451        | ENST00000370708.4 |
| CCDC80        | ENST00000206423.3 |
| FOXB1         | ENST00000396057.4 |
| ADAMTS5       | ENST00000284987.5 |
| AMD1          | ENST00000368885.3 |
| ZBTB6         | ENST00000373659.3 |
| USP37         | ENST00000258399.3 |
| SLC46A1       | ENST00000440501.1 |
| RASSF5        | ENST00000367117.3 |
| BAIAP3        | ENST00000397488.2 |
| CMTR1         | ENST00000373451.4 |
| RAD23B        | ENST00000358015.3 |
| PRELID2       | ENST00000334744.4 |
| FAM122A       | ENST00000394264.3 |
| PLSCR1        | ENST00000342435.4 |
| SYDE2         | ENST00000341460.5 |
| NFIC          | ENST00000346156.5 |
| ZNF516        | ENST00000443185.2 |
| BCKDHB        | ENST00000545529.1 |
| FBX046        | ENST00000317683.3 |
| KRTAP4-9      | ENST00000391415.1 |
| DUSP3         | ENST00000226004.3 |
| MBP           | ENST00000397863.1 |
| FAM63B        | ENST00000559228.1 |
| PIEZO2        | ENST00000302079.6 |
| RP11-863K10.7 | ENST00000330539.1 |
| CPEB2         | ENST00000538197.1 |
| SEMA3D        | ENST00000284136.6 |
| ID4           | ENST00000378700.3 |
| MBOAT2        | ENST00000305997.3 |
| CREB1         | ENST00000432329.2 |
| CACNA1G       | ENST00000352832.5 |
| FBXL4         | ENST00000369244.2 |
| NCEH1         | ENST00000475381.1 |
| POGZ          | ENST00000392723.1 |
| UBR2          | ENST00000372883.3 |
| SERTAD4       | ENST00000367012.3 |
| KLF8          | ENST00000468660.1 |
| ASCC1         | ENST00000342444.4 |
| SHROOM2       | ENST00000380913.3 |
| PRKCA         | ENST00000413366.3 |

|           |                   |
|-----------|-------------------|
| ZNF532    | ENST00000336078.4 |
| MAP1B     | ENST00000296755.7 |
| TACR1     | ENST00000305249.5 |
| SIRPB2    | ENST00000359801.3 |
| TSPAN1    | ENST00000372003.1 |
| KIAA1009  | ENST00000257766.4 |
| HPCAL4    | ENST00000372844.3 |
| DPY19L3   | ENST00000586987.1 |
| UHRF1BP1  | ENST00000192788.5 |
| OGFOD3    | ENST00000329197.5 |
| SIX5      | ENST00000560168.1 |
| LSAMP     | ENST00000490035.2 |
| TSPAN2    | ENST00000369516.2 |
| GJC1      | ENST00000426548.1 |
| ZNF845    | ENST00000458035.1 |
| CHSY3     | ENST00000305031.4 |
| POU2F2    | ENST00000342301.4 |
| ANKRD42   | ENST00000393389.3 |
| ELMOD3    | ENST00000315658.7 |
| PARP9     | ENST00000477522.2 |
| MYPN      | ENST00000358913.5 |
| KIAA1199  | ENST00000220244.3 |
| ANKRD10   | ENST00000375758.5 |
| BCORL1    | ENST00000540052.1 |
| AMPD3     | ENST00000444303.2 |
| C2        | ENST00000299367.5 |
| NXF1      | ENST00000531709.2 |
| GAB4      | ENST00000400588.1 |
| DEPDC5    | ENST00000382105.2 |
| TUB       | ENST00000305253.4 |
| NIPSNAP3B | ENST00000374762.3 |
| RBM3      | ENST00000354480.2 |
| ITGA6     | ENST00000375221.2 |
| GDPGP1    | ENST00000558017.1 |
| ING5      | ENST00000313552.6 |
| SLC25A44  | ENST00000359511.4 |
| FAM168B   | ENST00000409185.1 |
| CBX6      | ENST00000407418.3 |
| ATPAF1    | ENST00000576409.1 |
| MRPL19    | ENST00000393909.2 |
| SMAD5     | ENST00000545279.1 |
| DCPS      | ENST00000263579.4 |
| RPRD2     | ENST00000539519.1 |
| IRGQ      | ENST00000422989.1 |
| SLC30A6   | ENST00000282587.5 |
| SDAD1     | ENST00000356260.5 |
| ZNF285    | ENST00000330997.4 |
| CDK19     | ENST00000368911.3 |
| ZNF287    | ENST00000395824.1 |
| ARNT      | ENST00000358595.5 |
| DDX46     | ENST00000452510.2 |
| CERS3     | ENST00000284382.4 |
| SIDT1     | ENST00000264852.4 |
| SHISA7    | ENST00000376325.4 |



|            |                   |
|------------|-------------------|
| ZNF831     | ENST00000371030.2 |
| RIMS1      | ENST00000348717.5 |
| BEND3      | ENST00000369042.1 |
| WDR52      | ENST00000393845.2 |
| PREX1      | ENST00000396220.1 |
| SFMBT2     | ENST00000361972.4 |
| PDZD2      | ENST00000438447.1 |
| HTR7       | ENST00000371719.2 |
| PCLO       | ENST00000333891.9 |
| LZTS1      | ENST00000381569.1 |
| DIP2B      | ENST00000301180.5 |
| TANK       | ENST00000457476.1 |
| BLOC1S4    | ENST00000320776.3 |
| ARID3A     | ENST00000263620.3 |
| KCNMB3     | ENST00000497599.1 |
| PAFAH1B2   | ENST00000527958.1 |
| EIF2S2     | ENST00000374980.2 |
| FMN1       | ENST00000334528.9 |
| COLGALT1   | ENST00000252599.4 |
| ZNF605     | ENST00000360187.4 |
| HOMEZ      | ENST00000357460.5 |
| HIPK1      | ENST00000369558.1 |
| ARHGAP39   | ENST00000377307.2 |
| PRRT4      | ENST00000489835.2 |
| PIRT       | ENST00000580256.2 |
| KDM5C      | ENST00000375401.3 |
| SDK2       | ENST00000392650.3 |
| DENND4B    | ENST00000361217.4 |
| ST6GALNAC6 | ENST00000373146.1 |
| GMIP       | ENST00000203556.4 |
| ZNF652     | ENST00000362063.2 |
| ADH5       | ENST00000296412.8 |
| DIO2       | ENST00000438257.4 |
| LZTFL1     | ENST00000539217.1 |
| ANGEL1     | ENST00000251089.2 |
| RREB1      | ENST00000379938.2 |
| GLUL       | ENST00000331872.6 |
| HECW2      | ENST00000260983.3 |
| NKTR       | ENST00000232978.8 |
| NACC2      | ENST00000371753.1 |
| RAB5C      | ENST00000346213.4 |
| PIKFYVE    | ENST00000264380.4 |
| TADA2A     | ENST00000394395.2 |
| NACC1      | ENST00000292431.4 |
| ELK3       | ENST00000228741.3 |
| PVRL1      | ENST00000264025.3 |
| AC132186.1 | ENST00000544589.1 |
| VAV2       | ENST00000406606.3 |
| ASXL2      | ENST00000435504.4 |
| MC2R       | ENST00000327606.3 |
| NPAS3      | ENST00000346562.2 |
| KIFC3      | ENST00000465878.2 |
| PUM2       | ENST00000338086.5 |
| GGCX       | ENST00000233838.4 |

|          |                   |
|----------|-------------------|
| NAA50    | ENST00000240922.3 |
| RHEB     | ENST00000262187.5 |
| CHEK1    | ENST00000534070.1 |
| ABCA5    | ENST00000392676.3 |
| ARIH2    | ENST00000356401.4 |
| GBP2     | ENST00000370466.3 |
| PIP4K2C  | ENST00000354947.5 |
| HOXB6    | ENST00000484302.2 |
| WNT9B    | ENST00000290015.2 |
| PTCHD4   | ENST00000339488.4 |
| TPCN2    | ENST00000294309.3 |
| DUXA     | ENST00000554048.2 |
| DUSP7    | ENST00000495880.1 |
| DNAJC28  | ENST00000381947.3 |
| TRPC1    | ENST00000273482.6 |
| AKR1C2   | ENST00000380753.4 |
| HOXC13   | ENST00000243056.3 |
| SPTBN5   | ENST00000320955.6 |
| CCDC120  | ENST00000376396.3 |
| PAX5     | ENST00000358127.4 |
| DPP10    | ENST00000410059.1 |
| KIAA1524 | ENST00000295746.8 |
| COL3A1   | ENST00000304636.3 |
| TOB2     | ENST00000327492.3 |
| HEMK1    | ENST00000232854.4 |
| EDARADD  | ENST00000359362.5 |
| PRPF40A  | ENST00000410080.1 |
| C12orf23 | ENST00000548125.1 |
| SSPN     | ENST00000242729.2 |
| CASC10   | ENST00000377113.5 |
| IRS1     | ENST00000305123.5 |
| ABI2     | ENST00000295851.5 |
| AKAP13   | ENST00000394518.2 |
| TRIM46   | ENST00000392451.2 |
| RAVER1   | ENST00000293677.6 |
| UBE2Z    | ENST00000360943.5 |
| PER3     | ENST00000377532.3 |
| MCC      | ENST00000302475.4 |
| KBTBD8   | ENST00000295568.4 |
| RSAD1    | ENST00000258955.2 |
| AADACL3  | ENST00000332530.3 |
| STK36    | ENST00000295709.3 |
| U2AF2    | ENST00000450554.2 |
| PPIL2    | ENST00000406385.1 |
| PDE11A   | ENST00000286063.6 |
| TEF      | ENST00000266304.4 |
| MAPKAPK3 | ENST00000446044.1 |
| MPPED1   | ENST00000417669.2 |
| MOCOS    | ENST00000261326.5 |
| TP53INP1 | ENST00000448464.2 |
| C3orf70  | ENST00000335012.2 |
| NCLN     | ENST00000246117.4 |
| WDR59    | ENST00000262144.6 |
| MED29    | ENST00000315588.5 |

|                    |                   |
|--------------------|-------------------|
| C20orf144          | ENST00000375222.3 |
| SNX30              | ENST00000374232.3 |
| PSD4               | ENST00000441564.3 |
| STAT3              | ENST00000585517.1 |
| HEYL               | ENST00000372852.3 |
| KCNIP2             | ENST00000348850.5 |
| FMNL2              | ENST00000475377.2 |
| CSNK2B-LY6G5B-1181 | ENST00000375880.2 |
| NUFIP2             | ENST00000225388.4 |
| TNS1               | ENST00000171887.4 |
| SCN2A              | ENST00000375437.2 |
| CDYL2              | ENST00000570137.2 |
| FAM110B            | ENST00000361488.3 |
| ATP6V1C1           | ENST00000395862.3 |
| MAT2A              | ENST00000306434.3 |
| SCG3               | ENST00000220478.3 |
| PCSK1              | ENST00000311106.3 |
| PDE4DIP            | ENST00000369345.4 |
| TBC1D30            | ENST00000542120.1 |
| AGA                | ENST00000264595.2 |
| KMT2D              | ENST00000301067.7 |
| LZIC               | ENST00000377223.1 |
| ABL2               | ENST00000502732.1 |
| ZBED1              | ENST00000381223.4 |
| SLC6A5             | ENST00000525748.1 |
| ERCC6              | ENST00000355832.5 |
| CYC1               | ENST00000318911.4 |
| FLYWCH1            | ENST00000253928.9 |
| HS3ST3B1           | ENST00000360954.2 |
| CA7                | ENST00000394069.3 |
| NAPB               | ENST00000377026.4 |
| DCUN1D1            | ENST00000292782.4 |
| SLA2               | ENST00000262866.4 |
| ST8SIA3            | ENST00000324000.3 |
| ACVR2B             | ENST00000352511.4 |
| ZBTB7A             | ENST00000322357.4 |
| TEAD2              | ENST00000598810.1 |
| PSEN1              | ENST00000344094.3 |
| TNKS               | ENST00000310430.6 |
| NHLRC2             | ENST00000369301.3 |
| TIAF1              | ENST00000408971.2 |
| ARHGAP17           | ENST00000441763.2 |
| HTR1D              | ENST00000374619.1 |
| GOLT1B             | ENST00000540141.1 |
| MLLT6              | ENST00000325718.7 |
| FAM78A             | ENST00000372269.3 |
| C17orf85           | ENST00000158149.3 |
| SOX6               | ENST00000316399.6 |
| P2RX5              | ENST00000551178.1 |
| ZBED4              | ENST00000216268.5 |
| ZNF70              | ENST00000341976.3 |
| NLRP5              | ENST00000390649.3 |
| FARSA              | ENST00000588025.1 |
| TDRP               | ENST00000324079.6 |

|              |                   |
|--------------|-------------------|
| SYNGR1       | ENST00000328933.5 |
| TMEM55A      | ENST00000285419.3 |
| EDA2R        | ENST00000374719.3 |
| LPGAT1       | ENST00000366997.4 |
| ELF4         | ENST00000335997.7 |
| SV2A         | ENST00000369146.3 |
| TBC1D10C     | ENST00000526387.1 |
| AMOT         | ENST00000304758.1 |
| FIBIN        | ENST00000318627.2 |
| ZNF484       | ENST00000395505.2 |
| TFAP2B       | ENST00000393655.3 |
| HNMT         | ENST00000280097.3 |
| HGSNAT       | ENST00000379644.4 |
| TUBB4B       | ENST00000340384.4 |
| CERS6        | ENST00000305747.6 |
| GAB1         | ENST00000262995.4 |
| ARSB         | ENST00000264914.4 |
| CPM          | ENST00000551568.1 |
| ATP10D       | ENST00000273859.3 |
| ANK2         | ENST00000357077.4 |
| GPR75        | ENST00000394705.2 |
| EREG         | ENST00000244869.2 |
| AGO4         | ENST00000373210.3 |
| TRIM26       | ENST00000437089.1 |
| FAM117A      | ENST00000240364.2 |
| HAUS6        | ENST00000380502.3 |
| ARHGAP32     | ENST00000524655.1 |
| PPFIA4       | ENST00000447715.2 |
| SALL2        | ENST00000327430.3 |
| ANXA11       | ENST00000372231.3 |
| IL17RD       | ENST00000296318.7 |
| RGS10        | ENST00000392865.1 |
| BBX          | ENST00000415149.2 |
| AP5M1        | ENST00000261558.3 |
| TCEB1        | ENST00000518127.1 |
| EFR3B        | ENST00000403714.3 |
| RP11-664D7.4 | ENST00000512294.3 |
| AIMP1        | ENST00000394701.4 |
| AP5S1        | ENST00000379573.2 |
| KLHL38       | ENST00000325995.7 |
| ZNRF1        | ENST00000335325.4 |
| SLC12A5      | ENST00000243964.3 |
| ATP1B2       | ENST00000250111.4 |
| TMEM255A     | ENST00000309720.5 |
| ZC3H12B      | ENST00000338957.4 |
| MAP2K6       | ENST00000590474.1 |
| CYP27B1      | ENST00000228606.4 |
| YTHDF3       | ENST00000539294.1 |
| MLX          | ENST00000435881.2 |
| GXYLT2       | ENST00000389617.4 |
| GINS2        | ENST00000253462.3 |
| FBX041       | ENST00000295133.5 |
| METTL2B      | ENST00000480046.1 |
| GNPDA2       | ENST00000509756.1 |

|          |                   |
|----------|-------------------|
| ZNF799   | ENST00000419318.1 |
| MAP9     | ENST00000311277.4 |
| ANKRD40  | ENST00000285243.6 |
| MLH3     | ENST00000355774.2 |
| TDRD6    | ENST00000544460.1 |
| NUTF2    | ENST00000219169.4 |
| C6orf89  | ENST00000480824.2 |
| SARM1    | ENST00000457710.3 |
| SSNA1    | ENST00000322310.5 |
| ZCCHC24  | ENST00000372336.3 |
| FBRSL1   | ENST00000434748.2 |
| KCTD15   | ENST00000284006.6 |
| RASGEF1A | ENST00000374459.1 |
| C3orf14  | ENST00000494481.1 |
| SAR1B    | ENST00000402673.2 |
| KBTBD11  | ENST00000320248.3 |
| TTBK1    | ENST00000259750.4 |
| MGAT3    | ENST00000341184.6 |
| TBC1D2B  | ENST00000409931.3 |
| KIF3C    | ENST00000264712.3 |
| ZNF862   | ENST00000223210.4 |
| DLGAP2   | ENST00000421627.2 |
| GPLD1    | ENST00000230036.1 |
| TIFAB    | ENST00000537858.1 |
| HYOU1    | ENST00000404233.3 |
| C8orf86  | ENST00000358138.1 |
| PTGER3   | ENST00000370924.4 |
| TMEM151A | ENST00000327259.4 |
| ATRNL1   | ENST00000355044.3 |
| AGFG2    | ENST00000262935.4 |
| PER2     | ENST00000254658.3 |
| CATSPERG | ENST00000215069.4 |
| MN1      | ENST00000302326.4 |
| FLJ14816 | ENST00000593290.1 |
| C2CD2    | ENST00000329623.7 |
| ONECUT3  | ENST00000382349.4 |
| UNC5B    | ENST00000335350.6 |
| RPS14    | ENST00000401695.3 |
| CYP4F22  | ENST00000269703.3 |
| CALHM1   | ENST00000329905.5 |
| FAIM2    | ENST00000320634.3 |
| SYT9     | ENST00000318881.6 |
| ZFYVE26  | ENST00000347230.4 |
| KCNC3    | ENST00000376959.2 |
| SLC25A36 | ENST00000446041.2 |
| RASSF9   | ENST00000361228.3 |
| FBXW2    | ENST00000608872.1 |
| CCDC47   | ENST00000225726.5 |
| KDM5B    | ENST00000367265.3 |
| ERBB2    | ENST00000584450.1 |
| USP10    | ENST00000219473.7 |
| GID4     | ENST00000268719.4 |
| ERC1     | ENST00000355446.5 |
| CPSF4L   | ENST00000344935.4 |

|              |                   |
|--------------|-------------------|
| CHDH         | ENST00000315251.6 |
| DNAJC5       | ENST00000360864.4 |
| IVNS1ABP     | ENST00000367498.3 |
| RNF8         | ENST00000373479.4 |
| FNBP1        | ENST00000355681.3 |
| DMD          | ENST00000378677.2 |
| CADM3        | ENST00000368125.4 |
| TVP23C-CDRT4 | ENST00000522212.2 |
| FAM179B      | ENST00000382233.2 |
| AL590822.1   | ENST00000545087.1 |
| ZNF331       | ENST00000253144.9 |
| C10orf126    | ENST00000375520.1 |
| AFAP1        | ENST00000360265.4 |
| TTC7A        | ENST00000319190.5 |
| TSC1         | ENST00000298552.3 |
| IPO11        | ENST00000409534.1 |
| MYSM1        | ENST00000472487.1 |
| SAP30        | ENST00000296504.3 |
| TAB1         | ENST00000216160.6 |
| PPP2R3A      | ENST00000264977.3 |
| INCENP       | ENST00000394818.3 |
| DUSP22       | ENST00000419235.2 |
| FAM172A      | ENST00000395965.3 |
| MRVI1        | ENST00000421747.1 |
| BRPF3        | ENST00000534400.1 |
| SIM1         | ENST00000369208.3 |
| LACE1        | ENST00000368977.4 |
| DHX36        | ENST00000496811.1 |
| CCDC6        | ENST00000263102.6 |
| AGAP1        | ENST00000304032.8 |
| TBL1X        | ENST00000407597.2 |
| ZBTB8A       | ENST00000316459.4 |
| NOTCH2       | ENST00000256646.2 |
| ICOSLG       | ENST00000407780.3 |
| RAD18        | ENST00000264926.2 |
| ZNF426       | ENST00000253115.2 |
| EGFR         | ENST00000275493.2 |
| VIPR2        | ENST00000262178.2 |
| TMEM81       | ENST00000367167.3 |
| ZNF730       | ENST00000593635.1 |
| MIER2        | ENST00000264819.4 |
| ILDR2        | ENST00000469934.2 |
| ITGAM        | ENST00000544665.3 |
| TPCN1        | ENST00000335509.6 |
| MACROD2      | ENST00000217246.4 |
| CHST15       | ENST00000346248.5 |
| GOLGA3       | ENST00000204726.3 |
| FANCC        | ENST00000289081.3 |
| COPZ1        | ENST00000551779.1 |
| FBXO30       | ENST00000237281.4 |
| STC1         | ENST00000290271.2 |
| CHD9         | ENST00000566029.1 |
| PTPRE        | ENST00000254667.3 |
| EFCAB11      | ENST00000316738.7 |

|          |                   |
|----------|-------------------|
| PDPR     | ENST00000568530.1 |
| ANO10    | ENST00000414522.2 |
| ZNF24    | ENST00000589881.1 |
| GRAMD3   | ENST00000285689.3 |
| PDZD4    | ENST00000164640.4 |
| ZNF346   | ENST00000503039.1 |
| TTYH1    | ENST00000301194.4 |
| SEC61A1  | ENST00000243253.3 |
| ARSG     | ENST00000448504.2 |
| SOX1     | ENST00000330949.1 |
| GRIA1    | ENST00000285900.5 |
| AIG1     | ENST00000357847.4 |
| MINA     | ENST00000333396.7 |
| CSF3R    | ENST00000373106.1 |
| TWISTNB  | ENST00000222567.5 |
| C4orf46  | ENST00000508457.1 |
| SPATA5   | ENST00000274008.4 |
| PLCG1    | ENST00000244007.3 |
| MARK4    | ENST00000300843.4 |
| ZBTB40   | ENST00000404138.1 |
| GPCPD1   | ENST00000379019.4 |
| JAKMIP2  | ENST00000507386.1 |
| FBXL7    | ENST00000504595.1 |
| DLEU1    | ENST00000378180.4 |
| KCNS1    | ENST00000306117.1 |
| FAM109B  | ENST00000321753.3 |
| TSPAN9   | ENST00000537971.1 |
| RBP2     | ENST00000232217.2 |
| ARHGAP44 | ENST00000262444.9 |
| GALNT7   | ENST00000265000.4 |
| NSD1     | ENST00000439151.2 |
| DUSP4    | ENST00000240100.2 |
| TBCK     | ENST00000273980.5 |
| SELPLG   | ENST00000388962.3 |
| GPR156   | ENST00000464295.1 |
| GAS7     | ENST00000437099.2 |
| NUCB2    | ENST00000529010.1 |
| AKAP6    | ENST00000557272.1 |
| PORCN    | ENST00000355961.4 |
| GRM5     | ENST00000418177.2 |
| RBM5     | ENST00000347869.3 |
| BEST3    | ENST00000488961.1 |
| GPR176   | ENST00000299092.3 |
| ARHGAP33 | ENST00000378944.5 |
| RICTOR   | ENST00000357387.3 |
| BLK      | ENST00000259089.4 |
| NRXN3    | ENST00000281127.7 |
| TPRA1    | ENST00000296210.7 |
| AHRR     | ENST00000316418.5 |
| ARHGEF5  | ENST00000056217.5 |
| TBC1D19  | ENST00000264866.4 |
| PAWR     | ENST00000328827.4 |
| RAP1A    | ENST00000369709.3 |
| SLC22A23 | ENST00000436008.2 |

|          |                   |
|----------|-------------------|
| MRE11A   | ENST00000323929.3 |
| TEP1     | ENST00000262715.5 |
| TAF9B    | ENST00000341864.5 |
| DNALI1   | ENST00000296218.7 |
| TSHZ2    | ENST00000371497.5 |
| PLEKH01  | ENST00000369124.4 |
| NKX3-2   | ENST00000382438.5 |
| PIK3C3   | ENST00000262039.4 |
| SETD5    | ENST00000402198.1 |
| ORC4     | ENST00000392857.5 |
| BNIP2    | ENST00000267859.3 |
| ISPD     | ENST00000407010.2 |
| C2CD4C   | ENST00000332235.6 |
| PDE8A    | ENST00000310298.4 |
| OPALIN   | ENST00000371172.3 |
| ZNF701   | ENST00000540331.1 |
| RSPRY1   | ENST00000394420.4 |
| FZD1     | ENST00000287934.2 |
| SPOCK2   | ENST00000373109.2 |
| ACAP2    | ENST00000326793.6 |
| WRN      | ENST00000298139.5 |
| CLPB     | ENST00000294053.3 |
| SMARCC2  | ENST00000394023.3 |
| AGPAT4   | ENST00000366911.5 |
| ZNF626   | ENST00000291750.6 |
| MDH1B    | ENST00000374412.3 |
| MSI2     | ENST00000284073.2 |
| ARSI     | ENST00000328668.7 |
| ENY2     | ENST00000520147.1 |
| SLC20A1  | ENST00000272542.3 |
| FBXL19   | ENST00000338343.4 |
| PHTF2    | ENST00000416283.2 |
| KATNAL1  | ENST00000380615.3 |
| ANKRD33B | ENST00000296657.5 |
| RRAGD    | ENST00000369415.4 |
| RERE     | ENST00000337907.3 |
| WWC1     | ENST00000265293.4 |
| TTL      | ENST00000233336.6 |
| AGR2     | ENST00000419304.2 |
| NDFIP2   | ENST00000218652.7 |
| MTPAP    | ENST00000263063.4 |
| FAM110A  | ENST00000381941.3 |
| HS3ST1   | ENST0000002596.5  |
| HIP1     | ENST00000336926.6 |
| ARID5B   | ENST00000279873.7 |
| BCAM     | ENST00000270233.6 |
| KIAA0232 | ENST00000425103.1 |
| SLC35D1  | ENST00000235345.5 |
| PLXNC1   | ENST00000258526.4 |
| COL5A3   | ENST00000264828.3 |
| KBTBD12  | ENST00000405256.1 |
| GRIN3A   | ENST00000361820.3 |
| SLITRK4  | ENST00000381779.4 |
| RND2     | ENST00000544533.1 |



|               |                   |
|---------------|-------------------|
| RP11-268J15.5 | ENST00000373137.2 |
| CLMP          | ENST00000448775.2 |
| ZWILCH        | ENST00000307897.5 |
| SLC25A21      | ENST00000331299.5 |
| SEMA3E        | ENST00000307792.3 |
| HECW1         | ENST00000395891.2 |
| STEAP3        | ENST00000409811.1 |
| LNPEP         | ENST00000231368.5 |
| AMN           | ENST00000299155.5 |
| TAF1C         | ENST00000341690.6 |
| ZNF155        | ENST00000270014.2 |
| PRDM16        | ENST00000511072.1 |
| RAD51D        | ENST00000345365.6 |
| MARVELD2      | ENST00000325631.5 |
| WIZ           | ENST00000389282.4 |
| ONECUT1       | ENST00000560699.2 |
| ARRB1         | ENST00000420843.2 |
| ZNF592        | ENST00000299927.3 |
| RAD1          | ENST00000382038.2 |
| TFDP2         | ENST00000499676.2 |
| MYO1E         | ENST00000288235.4 |
| MRPL4         | ENST00000590669.1 |
| KREMEN1       | ENST00000400335.4 |
| KLHL29        | ENST00000486442.1 |
| SCN4A         | ENST00000578147.1 |
| HAS3          | ENST00000306560.1 |
| GPR116        | ENST00000283296.7 |
| GJD3          | ENST00000578689.1 |
| USP2          | ENST00000455332.2 |
| LARP1         | ENST00000336314.4 |
| TMEM181       | ENST00000367090.3 |
| PARN          | ENST00000437198.2 |
| NRBP2         | ENST00000442628.2 |
| UNC45B        | ENST00000268876.5 |
| CHD2          | ENST00000394196.4 |
| PCSK2         | ENST00000377899.1 |
| ZNF646        | ENST00000394979.2 |
| MAP4          | ENST00000383737.4 |
| STOX2         | ENST00000308497.4 |
| ROCK1         | ENST00000399799.2 |
| ZBTB4         | ENST00000380599.4 |
| ZDBF2         | ENST00000374423.3 |
| CHD6          | ENST00000373233.3 |
| TRIM33        | ENST00000358465.2 |
| AHNAK         | ENST00000378024.4 |
| FEM1A         | ENST00000269856.3 |
| PPP1R16B      | ENST00000299824.1 |
| SCRT1         | ENST00000332135.4 |
| LARGE         | ENST00000354992.2 |
| COL8A2        | ENST00000303143.4 |
| PTAFR         | ENST00000373857.3 |
| MGAT5         | ENST00000409645.1 |
| PPP2R5A       | ENST00000261461.2 |
| MARCH9        | ENST00000266643.5 |

|           |                   |
|-----------|-------------------|
| DOCK5     | ENST00000276440.7 |
| RPS6KA2   | ENST00000265678.4 |
| TMEM237   | ENST00000409444.2 |
| PSKH1     | ENST00000291041.5 |
| ZMAT3     | ENST00000311417.2 |
| SYAP1     | ENST00000380155.3 |
| PANK3     | ENST00000239231.6 |
| HFE       | ENST00000357618.5 |
| MASTL     | ENST00000342386.6 |
| RMND5B    | ENST00000515098.1 |
| RIMS3     | ENST00000372684.3 |
| ATP6V1E1  | ENST00000253413.5 |
| SLC16A10  | ENST00000368850.3 |
| RABIF     | ENST00000367262.3 |
| NCR3LG1   | ENST00000338965.4 |
| MRPS16    | ENST00000372945.3 |
| TFCP2L1   | ENST00000263707.5 |
| PTRHD1    | ENST00000328379.5 |
| SOS1      | ENST00000426016.1 |
| ARL10     | ENST00000310389.5 |
| MRRF      | ENST00000344641.3 |
| GRAMD2    | ENST00000309731.7 |
| NAT9      | ENST00000357814.3 |
| COPS7B    | ENST00000373608.3 |
| ATXN2     | ENST00000550104.1 |
| CDK16     | ENST00000457458.2 |
| PRNP      | ENST00000379440.4 |
| KNOP1     | ENST00000219837.7 |
| BHLHA15   | ENST00000609256.1 |
| GMPPB     | ENST00000480687.1 |
| DYNC1LI1  | ENST00000273130.4 |
| TRAF6     | ENST00000526995.1 |
| KIF6      | ENST00000287152.7 |
| RAB11FIP4 | ENST00000325874.8 |
| ACBD5     | ENST00000396271.3 |
| EBF1      | ENST00000313708.6 |
| CCND2     | ENST00000261254.3 |
| CDCA2     | ENST00000330560.3 |
| NMT2      | ENST00000378165.4 |
| PDPK1     | ENST00000441549.3 |
| LIFR      | ENST00000263409.4 |
| BACH2     | ENST00000257749.4 |
| NOL10     | ENST00000345985.3 |
| RAB3IP    | ENST00000483530.2 |
| ATG2B     | ENST00000359933.4 |
| LRRC8B    | ENST00000330947.2 |
| ADCY2     | ENST00000338316.4 |
| PAPPA     | ENST00000328252.3 |
| CUL2      | ENST00000374746.1 |
| CCNE2     | ENST00000520509.1 |
| TRIM13    | ENST00000378182.3 |
| GDF11     | ENST00000257868.5 |
| DNAJC18   | ENST00000302060.5 |
| SCN2B     | ENST00000278947.5 |

|            |                   |
|------------|-------------------|
| SIDT2      | ENST00000324225.4 |
| HOXC8      | ENST00000040584.4 |
| SPOCD1     | ENST00000373648.2 |
| LRIG2      | ENST00000361127.5 |
| ST6GALNAC3 | ENST00000328299.3 |
| CTU1       | ENST00000421832.2 |
| KCNK3      | ENST00000302909.3 |
| CENPI      | ENST00000372927.1 |
| TYW3       | ENST00000457880.2 |
| TTC39C     | ENST00000540918.2 |
| PDCD11     | ENST00000369797.3 |
| MAP4K4     | ENST00000413150.2 |
| PTTG1IP    | ENST00000397887.3 |
| SNRPD3     | ENST00000215829.3 |
| SLC10A6    | ENST00000273905.6 |
| AC090616.2 | ENST00000398832.2 |
| CLASP1     | ENST00000409078.3 |
| ZNF333     | ENST00000292530.6 |
| HSD17B12   | ENST00000278353.4 |
| GMPS       | ENST00000496455.2 |
| ITPR2      | ENST00000381340.3 |
| USP36      | ENST00000542802.3 |
| DCP2       | ENST00000389063.2 |
| EIF2AK1    | ENST00000199389.6 |
| TBC1D16    | ENST00000310924.2 |
| HELLS      | ENST00000394036.1 |
| ITGA1      | ENST00000282588.6 |
| MECP2      | ENST00000303391.6 |
| CAMK2A     | ENST00000348628.6 |
| VSX2       | ENST00000261980.2 |
| RBFOX2     | ENST00000449924.2 |
| E2F4       | ENST00000379378.3 |
| VWDE       | ENST00000275358.3 |
| TXK        | ENST00000264316.4 |
| RNF152     | ENST00000312828.3 |
| STOML1     | ENST00000564777.1 |
| VPS39      | ENST00000318006.5 |
| FSTL4      | ENST00000265342.7 |
| ARSK       | ENST00000380009.4 |
| LENG1      | ENST00000222224.3 |
| TGFBR1     | ENST00000374994.4 |
| ZFP82      | ENST00000392161.3 |
| ZNF566     | ENST00000454319.1 |
| LAMC1      | ENST00000258341.4 |
| SLC7A6     | ENST00000219343.6 |
| SPRED3     | ENST00000587013.1 |
| GDAP1L1    | ENST00000342560.5 |
| CECR2      | ENST00000400573.5 |
| IFNLR1     | ENST00000327575.2 |
| PDE7A      | ENST00000401827.3 |
| MYO1A      | ENST00000300119.3 |
| SORT1      | ENST00000256637.6 |
| DNAH10     | ENST00000409039.3 |
| PRMT10     | ENST00000322396.6 |

|          |                   |
|----------|-------------------|
| ARHGAP31 | ENST00000264245.4 |
| MTHFR    | ENST00000376592.1 |
| USP46    | ENST00000441222.3 |
| GTF3C4   | ENST00000372146.4 |
| CCPG1    | ENST00000310958.6 |
| SDHC     | ENST00000367975.2 |
| DNAJC11  | ENST00000377577.5 |
| RGS11    | ENST00000397770.3 |
| DHCR7    | ENST00000407721.2 |
| FLJ00104 | ENST00000446344.1 |
| NFKB1    | ENST00000226574.4 |
| THEM4    | ENST00000368814.3 |
| PLEKHA8  | ENST00000449726.1 |
| BACE1    | ENST00000313005.6 |
| ZDHHC14  | ENST00000359775.5 |
| CTBS     | ENST00000370630.5 |
| ARHGAP23 | ENST00000431231.2 |
| BCL2     | ENST00000398117.1 |
| PAFAH1B1 | ENST00000397195.5 |
| ZNF597   | ENST00000301744.4 |
| EPN2     | ENST00000314728.5 |
| SLC6A4   | ENST00000401766.2 |
| PDK1     | ENST00000282077.3 |
| KLHL11   | ENST00000319121.3 |
| AQR      | ENST00000156471.5 |
| PPFIA3   | ENST00000334186.4 |
| HEXA     | ENST00000268097.5 |
| RRP8     | ENST00000254605.6 |
| XRRA1    | ENST00000527087.1 |
| LYPLA2   | ENST00000374505.2 |
| C5orf63  | ENST00000535381.1 |
| AARS2    | ENST00000244571.4 |
| C2orf69  | ENST00000319974.5 |
| CHST6    | ENST00000332272.4 |
| GOSR1    | ENST00000225724.5 |
| SIM2     | ENST00000290399.6 |
| NIP7     | ENST00000254940.5 |
| FAM46C   | ENST00000369448.3 |
| ANKEF1   | ENST00000378380.3 |
| RPF2     | ENST00000441448.2 |
| SKA3     | ENST00000314759.5 |
| C21orf59 | ENST00000382549.4 |
| RAB3C    | ENST00000282878.4 |
| PEAK1    | ENST00000312493.4 |
| METTL16  | ENST00000263092.6 |
| SREBF2   | ENST00000361204.4 |
| NLGN1    | ENST00000457714.1 |
| MEF2D    | ENST00000464356.2 |
| CHST1    | ENST00000308064.2 |
| SFXN2    | ENST00000369893.5 |
| CDC73    | ENST00000367435.3 |
| CCSER2   | ENST00000224756.8 |
| SYK      | ENST00000375754.4 |
| LYVE1    | ENST00000256178.3 |

|          |                    |
|----------|--------------------|
| TM9SF1   | ENST00000530611.1  |
| GFRA2    | ENST00000524240.1  |
| OTUB1    | ENST00000538426.1  |
| TMED5    | ENST00000479918.1  |
| BPTF     | ENST00000321892.4  |
| DDX31    | ENST00000372159.3  |
| RPS28    | ENST00000600659.2  |
| PSMF1    | ENST00000335877.6  |
| XYLB     | ENST00000207870.3  |
| NEK9     | ENST00000238616.5  |
| SH3PXD2B | ENST00000311601.5  |
| SNX9     | ENST00000392185.3  |
| RPRD1A   | ENST00000399022.4  |
| TMEM186  | ENST00000333050.6  |
| KIAA1598 | ENST00000260777.10 |
| AFF1     | ENST00000395146.4  |
| CERS4    | ENST00000559336.1  |
| MYNN     | ENST00000544106.1  |
| AP1G1    | ENST00000299980.4  |
| ERCC6L2  | ENST00000407474.3  |
| PARP1    | ENST00000366794.5  |
| TACC1    | ENST00000330691.6  |
| ZNF614   | ENST00000270649.6  |
| ZNF519   | ENST00000590202.1  |
| RALY     | ENST00000375114.3  |
| FAM26E   | ENST00000368599.3  |
| THRB     | ENST00000396671.2  |
| HELZ2    | ENST00000427522.2  |
| CSDC2    | ENST00000306149.7  |
| PLAA     | ENST00000397292.3  |
| RIC8B    | ENST00000392837.4  |
| SNAPC5   | ENST00000566658.1  |
| GP2      | ENST00000302555.5  |
| NEDD4L   | ENST00000256832.7  |
| CEP85L   | ENST00000368491.3  |
| MARC1    | ENST00000366910.5  |
| ASB16    | ENST00000293414.1  |
| DEF6     | ENST00000316637.5  |
| SETD9    | ENST00000285947.2  |
| SLC5A3   | ENST00000608209.1  |
| DGKE     | ENST00000284061.3  |
| IQSEC1   | ENST00000273221.4  |
| LARP4B   | ENST00000316157.3  |
| MAP2     | ENST00000360351.4  |
| ORMDL3   | ENST00000304046.2  |
| LANCL3   | ENST00000378621.3  |
| LMBR1    | ENST00000353442.5  |
| LPAR3    | ENST00000440886.1  |
| CDK9     | ENST00000373264.4  |
| IQSEC2   | ENST00000375365.2  |
| UCK2     | ENST00000372212.4  |
| POLR3A   | ENST00000372371.3  |
| ENGASE   | ENST00000579016.1  |
| CSMD3    | ENST00000343508.3  |

|           |                   |
|-----------|-------------------|
| MLXIPL    | ENST00000434326.1 |
| SCN7A     | ENST00000409855.1 |
| PLEKH02   | ENST00000323544.4 |
| ZNF445    | ENST00000425708.2 |
| TAX1BP3   | ENST00000225525.3 |
| AHR       | ENST00000242057.4 |
| BLCAP     | ENST00000397137.1 |
| UBE2QL1   | ENST00000399816.3 |
| PLEKHM3   | ENST00000427836.2 |
| FAM49B    | ENST00000519824.2 |
| ARMCX3    | ENST00000341189.4 |
| PKIA      | ENST00000396418.2 |
| SEMA3A    | ENST00000265362.4 |
| ZNF347    | ENST00000334197.7 |
| NEGR1     | ENST00000357731.5 |
| DNAL1     | ENST00000553645.2 |
| PPP2R1B   | ENST00000527614.1 |
| SP1       | ENST00000426431.2 |
| ZKSCAN3   | ENST00000377255.3 |
| LETM1     | ENST00000302787.2 |
| C6orf223  | ENST00000439969.2 |
| ST3GAL2   | ENST00000342907.2 |
| STX11     | ENST00000367568.4 |
| KCNJ12    | ENST00000583088.1 |
| LRTM2     | ENST00000543818.1 |
| MGAT5B    | ENST00000428789.2 |
| PIK3CD    | ENST00000536656.1 |
| LSG1      | ENST00000265245.5 |
| ADAM23    | ENST00000264377.3 |
| TXNDC5    | ENST00000539054.1 |
| RBMS2     | ENST00000262031.5 |
| KIAA0895L | ENST00000561621.1 |
| GPATCH2   | ENST00000366935.3 |
| DDHD1     | ENST00000323669.5 |
| ARHGAP42  | ENST00000524892.2 |
| ISL2      | ENST00000290759.4 |
| KIFAP3    | ENST00000361580.2 |
| ANKRD34C  | ENST00000421388.2 |
| HPSE2     | ENST00000370546.1 |
| GBA       | ENST00000368373.3 |
| CAMK1D    | ENST00000378847.3 |
| SCML4     | ENST00000369022.2 |
| CREB3L2   | ENST00000330387.6 |
| AVPI1     | ENST00000370626.3 |
| MRPS5     | ENST00000272418.2 |
| NOTCH2NL  | ENST00000369340.3 |
| SH3TC2    | ENST00000502274.1 |
| LYN       | ENST00000520220.2 |
| DDX19A    | ENST00000302243.7 |
| SLC10A2   | ENST00000245312.3 |
| FLG2      | ENST00000388718.5 |
| BAP1      | ENST00000460680.1 |
| PHC2      | ENST00000431992.1 |
| ZNF416    | ENST00000196489.3 |

|           |                   |
|-----------|-------------------|
| SCLY      | ENST00000254663.6 |
| KIRREL3   | ENST00000525144.2 |
| ADAMTS14  | ENST00000373208.1 |
| KLHL34    | ENST00000379499.2 |
| NEURL1B   | ENST00000369800.5 |
| ZDHHC5    | ENST00000287169.3 |
| ZFR2      | ENST00000262961.4 |
| CELSR2    | ENST00000271332.3 |
| PIP5K1C   | ENST00000335312.3 |
| ADAM8     | ENST00000415217.3 |
| LMX1A     | ENST00000342310.3 |
| STMN3     | ENST00000370053.1 |
| SNRK      | ENST00000429705.2 |
| FAM53B    | ENST00000337318.3 |
| FZD4      | ENST00000531380.1 |
| KCNQ1     | ENST00000155840.5 |
| CHRNA2    | ENST00000368476.3 |
| NBPF20    | ENST00000369202.1 |
| SLC29A1   | ENST00000393844.1 |
| CHRD1     | ENST00000372045.1 |
| GDA       | ENST00000358399.3 |
| RAB11FIP1 | ENST00000287263.4 |
| C15orf62  | ENST00000344320.6 |
| LRP10     | ENST00000359591.4 |
| WASF3     | ENST00000335327.5 |
| C1orf172  | ENST00000320567.5 |
| ZNF664    | ENST00000538932.2 |
| IGDCC3    | ENST00000327987.4 |
| C4orf50   | ENST00000531445.1 |
| LDOC1L    | ENST00000341255.3 |
| PPP1CC    | ENST00000335007.5 |
| ACBD4     | ENST00000398322.3 |
| SLC2A4    | ENST00000317370.8 |
| GALNT2    | ENST00000366672.4 |
| NRK       | ENST00000243300.9 |
| ZNF37A    | ENST00000361085.5 |
| BRINP2    | ENST00000361539.4 |
| FMO2      | ENST00000441535.1 |
| MYH11     | ENST00000452625.2 |
| TNFAIP2   | ENST00000560869.1 |
| DTX4      | ENST00000227451.3 |
| SLC39A5   | ENST00000454355.2 |
| TENM3     | ENST00000511685.1 |
| ANKAR     | ENST00000438402.2 |
| AKT2      | ENST00000392038.2 |
| TMPRSS4   | ENST00000534111.1 |
| FER       | ENST00000281092.4 |
| PYCR1     | ENST00000329875.8 |
| ANAPC16   | ENST00000299381.4 |
| DLL4      | ENST00000249749.5 |
| KIF16B    | ENST00000354981.2 |
| SYNPO     | ENST00000307662.4 |
| MYT1L     | ENST00000399161.2 |
| SETD1B    | ENST00000267197.5 |

|          |                   |
|----------|-------------------|
| PML      | ENST00000565898.1 |
| LAMA4    | ENST00000230538.7 |
| SFRP1    | ENST00000220772.3 |
| CST3     | ENST00000398411.1 |
| ATP2A3   | ENST00000309890.7 |
| WDTC1    | ENST00000319394.3 |
| CCDC64   | ENST00000397558.2 |
| DIAPH1   | ENST00000389054.3 |
| CHRNA7   | ENST00000306901.3 |
| IGHMBP2  | ENST00000255078.3 |
| KLHL24   | ENST00000454652.2 |
| FARP2    | ENST00000264042.3 |
| ARHGAP6  | ENST00000380736.1 |
| PALM     | ENST00000338448.5 |
| CACNA1E  | ENST00000526775.1 |
| NUP188   | ENST00000372577.2 |
| EPHA8    | ENST00000166244.3 |
| THUMPD1  | ENST00000381337.2 |
| KIF1B    | ENST00000377086.1 |
| MARK2    | ENST00000402010.2 |
| MRC2     | ENST00000303375.5 |
| ZNF787   | ENST00000270459.3 |
| HNRNPUL1 | ENST00000352456.3 |
| SP6      | ENST00000342234.2 |
| TLCD2    | ENST00000330676.6 |
| ELMO1    | ENST00000341056.3 |
| ZNF585A  | ENST00000356958.4 |
| SLC38A7  | ENST00000570101.1 |
| DRP2     | ENST00000402866.1 |
| KCNC4    | ENST00000369787.3 |
| UBTF     | ENST00000343638.5 |
| GPD1     | ENST00000301149.3 |
| KIAA1239 | ENST00000309447.5 |
| KIAA0513 | ENST00000566428.1 |
| CACNA1I  | ENST00000402142.3 |
| LPIN1    | ENST00000256720.2 |
| PMFBP1   | ENST00000537465.1 |
| GPR179   | ENST00000342292.4 |
| NOS1AP   | ENST00000361897.5 |
| SUN2     | ENST00000405510.1 |
| FIZ1     | ENST00000221665.3 |
| ZNF707   | ENST00000358656.4 |
| CDR2L    | ENST00000337231.5 |
| GNA11    | ENST00000078429.4 |
| GATA5    | ENST00000252997.2 |
| CELF5    | ENST00000541430.2 |
| CECR1    | ENST00000399839.1 |
| CUX2     | ENST00000261726.6 |
| KCNJ5    | ENST00000529694.1 |
| TNN      | ENST00000239462.4 |
| FRRS1L   | ENST00000561981.2 |
| SYN1     | ENST00000340666.4 |
| CABP7    | ENST00000216144.3 |
| FLNB     | ENST00000357272.4 |



|            |                   |
|------------|-------------------|
| IQSEC3     | ENST00000538872.1 |
| CRTC3      | ENST00000420329.2 |
| HIC1       | ENST00000399849.3 |
| SH3RF2     | ENST00000511217.1 |
| KCNQ4      | ENST00000347132.5 |
| KDR        | ENST00000263923.4 |
| CMKLR1     | ENST00000312143.7 |
| GUCD1      | ENST00000447813.2 |
| IL21R      | ENST00000395755.1 |
| ZNF319     | ENST00000299237.2 |
| FHDC1      | ENST00000260008.3 |
| TDRD10     | ENST00000368480.3 |
| ORA0V1     | ENST00000279147.4 |
| ALPL       | ENST00000374840.3 |
| GPR63      | ENST00000229955.3 |
| MMP11      | ENST00000215743.3 |
| SPNS2      | ENST00000329078.3 |
| SPRN       | ENST00000414069.2 |
| TXLNB      | ENST00000358430.3 |
| ZNF829     | ENST00000520965.1 |
| ZNF132     | ENST00000254166.3 |
| XKR7       | ENST00000562532.2 |
| MGRN1      | ENST00000415496.1 |
| FOXI2      | ENST00000388920.4 |
| PCYT2      | ENST00000538936.2 |
| ARAP1      | ENST00000359373.5 |
| GYS1       | ENST00000323798.3 |
| PCDH7      | ENST00000543491.1 |
| SGSH       | ENST00000326317.6 |
| ST6GALNAC4 | ENST00000335791.5 |
| C9orf9     | ENST00000372136.3 |
| SH3BP4     | ENST00000392011.2 |
| UBALD1     | ENST00000590965.1 |
| C15orf53   | ENST00000318792.1 |
| LRRC15     | ENST00000347624.3 |
| B4GALT5    | ENST00000371711.4 |
| ATG16L2    | ENST00000321297.5 |
| CRKL       | ENST00000354336.3 |
| SLFN11     | ENST00000308377.4 |
| RGL1       | ENST00000304685.4 |
| FAT3       | ENST00000298047.6 |
| SLC8A2     | ENST00000236877.6 |
| ADAM33     | ENST00000356518.2 |
| DLST       | ENST00000334220.4 |
| SNPH       | ENST00000381873.3 |
| BRD4       | ENST00000263377.2 |
| ACVR1B     | ENST00000257963.4 |
| ZNF512B    | ENST00000369888.1 |
| KLHL30     | ENST00000409223.1 |
| RGP1       | ENST00000378078.4 |
| KIF18B     | ENST00000587309.1 |
| IQGAP3     | ENST00000361170.2 |
| ADAM19     | ENST00000257527.4 |
| DNAJB2     | ENST00000336576.5 |

|           |                   |
|-----------|-------------------|
| OGDH      | ENST00000222673.5 |
| KCNAB2    | ENST00000378097.1 |
| LRP4      | ENST00000378623.1 |
| POU3F1    | ENST00000373012.2 |
| NDUFA11   | ENST00000592634.1 |
| ADCYAP1R1 | ENST00000304166.4 |
| FOXRED2   | ENST00000397224.4 |
| NPAP1     | ENST00000329468.2 |
| MADD      | ENST00000406482.1 |
| RIMS4     | ENST00000372851.3 |
| HRNR      | ENST00000368801.2 |
| CUX1      | ENST00000437600.4 |
| TSPAN11   | ENST00000261177.9 |
| CACNA1D   | ENST00000288139.4 |
| TECPR2    | ENST00000359520.7 |
| C1QTNF1   | ENST00000392445.2 |
| NAV3      | ENST00000228327.6 |
| EPHA10    | ENST00000373048.4 |
| SLC30A10  | ENST00000366926.3 |
| ANKS1B    | ENST00000546960.1 |
| EVI5L     | ENST00000270530.4 |
| LRCH3     | ENST00000438796.2 |
| KIF3B     | ENST00000375712.3 |
| KIAA1024  | ENST00000305428.3 |
| TMEM198   | ENST00000373883.3 |
| DEDD2     | ENST00000336034.4 |
| C5orf20   | ENST00000503143.2 |
| MAT1A     | ENST00000372213.3 |
| ZNF81     | ENST00000338637.7 |
| RAB36     | ENST00000263116.2 |
| NDST1     | ENST00000261797.6 |
| TCF7      | ENST00000518915.1 |
| TGM2      | ENST00000361475.2 |
| NAA38     | ENST00000249299.2 |
| EP400     | ENST00000333577.4 |
| ATP11C    | ENST00000327569.3 |
| NRP1      | ENST00000374875.1 |
| CPSF7     | ENST00000340437.4 |
| PI4K2A    | ENST00000370649.3 |
| ADCK3     | ENST00000366779.1 |
| AVL9      | ENST00000318709.4 |
| SUPT16H   | ENST00000216297.2 |
| MCUR1     | ENST00000379170.4 |
| LBH       | ENST00000406087.1 |
| VDR       | ENST00000395324.2 |
| PHF12     | ENST00000577226.1 |
| NSFL1C    | ENST00000353088.2 |
| ZBTB34    | ENST00000319119.4 |
| CDK18     | ENST00000360066.2 |
| NDRG1     | ENST00000323851.7 |
| SYTL4     | ENST00000372989.1 |
| GLI2      | ENST00000452319.1 |
| CPD       | ENST00000225719.4 |
| TRPC6     | ENST00000344327.3 |

|          |                   |
|----------|-------------------|
| MICAL3   | ENST00000441493.2 |
| LILRA1   | ENST00000453777.1 |
| TMEM251  | ENST00000415050.2 |
| PFAS     | ENST00000314666.6 |
| AP1M1    | ENST00000291439.3 |
| GPAM     | ENST00000348367.4 |
| PHIP     | ENST00000275034.4 |
| NEDD4    | ENST00000338963.2 |
| PHC3     | ENST00000495893.2 |
| CNTN3    | ENST00000263665.6 |
| ZCCHC14  | ENST00000268616.4 |
| MTA3     | ENST00000405592.1 |
| CLINT1   | ENST00000523094.1 |
| CYSLTR2  | ENST00000282018.3 |
| UPF1     | ENST00000262803.5 |
| SLC7A1   | ENST00000380752.5 |
| TTC28    | ENST00000397906.2 |
| FAM177A1 | ENST00000280987.4 |
| AGPAT3   | ENST00000291572.8 |
| DDB1     | ENST00000301764.7 |
| KIF1C    | ENST00000320785.5 |
| COL1A1   | ENST00000225964.5 |
| ZNF469   | ENST00000437464.1 |
| CSMD2    | ENST00000373381.4 |
| SLC16A7  | ENST00000261187.4 |
| LCOR     | ENST00000371103.3 |
| EPHA6    | ENST00000470610.2 |
| BAG2     | ENST00000370693.5 |
| EPM2AIP1 | ENST00000322716.5 |
| TMEM139  | ENST00000359333.3 |
| TRPV3    | ENST00000301365.4 |
| CIT      | ENST00000392521.2 |
| COL4A6   | ENST00000334504.7 |
| ADRBK2   | ENST00000324198.6 |
| KIN      | ENST00000379562.4 |
| TIMM8A   | ENST00000372902.3 |
| GDF7     | ENST00000272224.3 |
| C14orf37 | ENST00000267485.7 |
| PQLC1    | ENST00000590381.1 |
| PPIL6    | ENST00000521072.2 |
| MCOLN3   | ENST00000370589.2 |
| TCIRG1   | ENST00000265686.3 |
| MRPS25   | ENST00000253686.2 |
| THBS2    | ENST00000366787.3 |
| FBN2     | ENST00000262464.4 |
| BFAR     | ENST00000261658.2 |
| SLC23A2  | ENST00000338244.1 |
| SEPNI    | ENST00000361547.2 |
| PRMT3    | ENST00000331079.6 |
| MTMR7    | ENST00000180173.5 |
| TRMT2B   | ENST00000338687.7 |
| GLYCTK   | ENST00000354773.4 |
| FBXL18   | ENST00000382368.3 |
| MAN2A2   | ENST00000360468.3 |

|           |                   |
|-----------|-------------------|
| TMTC1     | ENST00000256062.5 |
| FLT3      | ENST00000241453.7 |
| ZNF573    | ENST00000590414.2 |
| LPHN1     | ENST00000340736.6 |
| SLC30A7   | ENST00000370112.4 |
| PEX19     | ENST00000368072.5 |
| PAPOLG    | ENST00000238714.3 |
| LAD1      | ENST00000391967.2 |
| LMTK2     | ENST00000297293.5 |
| FAM211A   | ENST00000409083.3 |
| SOCS4     | ENST00000395472.2 |
| SLC03A1   | ENST00000318445.6 |
| NDOR1     | ENST00000427047.2 |
| TANG06    | ENST00000261778.1 |
| NOM1      | ENST00000275820.3 |
| C20orf112 | ENST00000359676.5 |
| TP73      | ENST00000378280.1 |
| IBA57     | ENST00000366711.3 |
| GABRQ     | ENST00000370306.2 |
| KAZN      | ENST00000422387.2 |
| NPEPPS    | ENST00000322157.4 |
| ZNF708    | ENST00000356929.3 |
| TMEM184B  | ENST00000361906.3 |
| DCBLD2    | ENST00000326840.6 |
| RILPL1    | ENST00000376874.4 |
| COX7A2L   | ENST00000378669.1 |
| SENP8     | ENST00000544411.1 |
| EFCAB2    | ENST00000366523.1 |
| ARHGAP26  | ENST00000378004.3 |
| FZD5      | ENST00000295417.3 |
| SLC35F6   | ENST00000344420.5 |
| FOXD3     | ENST00000371116.2 |
| EPT1      | ENST00000260585.7 |
| FNTB      | ENST00000246166.2 |
| PIP5K2    | ENST00000321521.9 |
| USP49     | ENST00000394253.3 |
| SH3PXD2A  | ENST00000369774.4 |
| SUPT3H    | ENST00000371460.1 |
| SPSB4     | ENST00000310546.2 |
| LTB4R     | ENST00000396789.4 |
| GPR107    | ENST00000372410.3 |
| SPA17     | ENST00000532692.1 |
| MTMR12    | ENST00000280285.5 |
| GABRB3    | ENST00000311550.5 |
| PCDH1     | ENST00000503492.1 |
| TNFAIP8L1 | ENST00000327473.4 |
| RRAS2     | ENST00000537760.1 |
| CCDC85C   | ENST00000380243.4 |
| C8orf59   | ENST00000417663.2 |
| ELFN2     | ENST00000402918.2 |
| HPX       | ENST00000265983.3 |
| RAB4A     | ENST00000366690.4 |
| MYO9A     | ENST00000564571.1 |
| CTH       | ENST00000411986.2 |

|            |                   |
|------------|-------------------|
| NOL9       | ENST00000377705.5 |
| TCEA3      | ENST00000450454.2 |
| SPTBN2     | ENST00000529997.1 |
| APBB2      | ENST00000295974.8 |
| ABLIM3     | ENST00000326685.7 |
| SLC35E1    | ENST00000595753.1 |
| PTPN18     | ENST00000175756.5 |
| LATS1      | ENST00000392273.3 |
| PRIM1      | ENST00000338193.6 |
| STX4       | ENST00000313843.3 |
| RALGAPA2   | ENST00000202677.7 |
| LSS        | ENST00000397728.3 |
| N4BP3      | ENST00000274605.5 |
| GGA3       | ENST00000351904.7 |
| BCL2L13    | ENST00000418951.2 |
| ZMYND8     | ENST00000311275.7 |
| MARCH4     | ENST00000273067.4 |
| GATA6      | ENST00000269216.3 |
| ALDH1L2    | ENST00000258494.9 |
| C4orf19    | ENST00000381980.4 |
| EIF2S1     | ENST00000256383.4 |
| ERVMER34-1 | ENST00000443173.1 |
| ALPK1      | ENST00000458497.1 |
| LDLRAD4    | ENST00000399848.3 |
| SERPINE1   | ENST00000223095.4 |
| NOD1       | ENST00000222823.4 |
| C16orf52   | ENST00000542527.2 |
| ZNF841     | ENST00000594295.1 |
| C2orf82    | ENST00000409533.1 |
| METAP1     | ENST00000296411.6 |
| ZNF589     | ENST00000427617.2 |
| ABR        | ENST00000302538.5 |
| SLC33A1    | ENST00000392845.3 |
| TRAF5      | ENST00000261464.5 |
| NR1H4      | ENST00000548884.1 |
| ADCY9      | ENST00000294016.3 |
| SPEM1      | ENST00000323675.3 |
| PRUNE2     | ENST00000376718.3 |
| FBXO11     | ENST00000402508.1 |
| WDR7       | ENST00000254442.3 |
| CPSF6      | ENST00000435070.2 |
| CCR6       | ENST00000341935.5 |
| FLRT2      | ENST00000330753.4 |
| SH3BP2     | ENST00000356331.5 |
| GNAQ       | ENST00000286548.4 |
| YOD1       | ENST00000315927.4 |
| PLA2G16    | ENST00000323646.5 |
| PPP1R3G    | ENST00000405617.2 |
| AK2        | ENST00000467905.1 |
| TRIM38     | ENST00000357085.3 |
| FAM19A5    | ENST00000358295.5 |
| CDK13      | ENST00000181839.4 |
| ADAMTS1    | ENST00000284984.3 |
| SORL1      | ENST00000260197.7 |

|          |                   |
|----------|-------------------|
| ZIC1     | ENST00000282928.4 |
| C1orf50  | ENST00000372525.5 |
| MYO18A   | ENST00000354329.4 |
| JAM2     | ENST00000480456.1 |
| EPG5     | ENST00000282041.5 |
| CNKSR3   | ENST00000607772.1 |
| NHP2L1   | ENST00000355257.3 |
| SOD2     | ENST00000538183.2 |
| SWSAP1   | ENST00000312423.2 |
| POLI     | ENST00000579534.1 |
| TPPP     | ENST00000360578.5 |
| TMEM53   | ENST00000372237.3 |
| NFX1     | ENST00000379540.3 |
| SUSD2    | ENST00000358321.3 |
| SMARCC1  | ENST00000254480.5 |
| TIAM1    | ENST00000286827.3 |
| EMX1     | ENST00000258106.6 |
| NAA11    | ENST00000286794.4 |
| ARHGEF11 | ENST00000368194.3 |
| RNMT     | ENST00000383314.2 |
| NOP9     | ENST00000396802.3 |
| VPS13A   | ENST00000360280.3 |
| RAB8A    | ENST00000300935.3 |
| FAM168A  | ENST00000064778.4 |
| FN1      | ENST00000357009.2 |
| USP13    | ENST00000263966.3 |
| MYEF2    | ENST00000324324.7 |
| UGDH     | ENST00000316423.6 |
| ZNF326   | ENST00000370447.3 |
| ASB1     | ENST00000264607.4 |
| NUB1     | ENST00000413040.2 |
| SLC24A4  | ENST00000393265.2 |
| DOPEY1   | ENST00000349129.2 |
| HSP90B1  | ENST00000299767.5 |
| VCAN     | ENST00000265077.3 |
| WDR41    | ENST00000296679.4 |
| DERL3    | ENST00000404056.1 |
| C9orf64  | ENST00000376344.3 |
| SLC38A9  | ENST00000396865.2 |
| SLC22A3  | ENST00000392145.1 |
| SNRPB2   | ENST00000377943.5 |
| RBMX2    | ENST00000305536.6 |
| OTUD7A   | ENST00000307050.4 |
| ATP8A2   | ENST00000381655.2 |
| CCDC127  | ENST00000296824.3 |
| USP30    | ENST00000257548.5 |
| GTDC1    | ENST00000392869.2 |
| HPS3     | ENST00000296051.2 |
| CA8      | ENST00000317995.4 |
| SELENBP1 | ENST00000368868.5 |
| CALCOCO1 | ENST00000548263.1 |
| ALG10    | ENST00000266483.2 |
| FAM120B  | ENST00000476287.1 |
| TMC7     | ENST00000421369.3 |

|          |                   |
|----------|-------------------|
| MUC20    | ENST00000320736.6 |
| IGFBPL1  | ENST00000377694.1 |
| OTUB2    | ENST00000203664.5 |
| METTL8   | ENST00000375258.4 |
| CCBE1    | ENST00000439986.4 |
| WDR3     | ENST00000349139.5 |
| SHROOM1  | ENST00000378679.3 |
| NAPG     | ENST00000322897.6 |
| MARCH3   | ENST00000308660.5 |
| NDUFS1   | ENST00000233190.6 |
| EYA4     | ENST00000367895.5 |
| SIRPA    | ENST00000400068.3 |
| CMSS1    | ENST00000421999.2 |
| TMC8     | ENST00000318430.5 |
| TYW5     | ENST00000354611.4 |
| FOXL1    | ENST00000320241.3 |
| ARFGEF2  | ENST00000371917.4 |
| NIPA1    | ENST00000337435.4 |
| ZNF248   | ENST00000395867.3 |
| ABCG2    | ENST00000515655.1 |
| SSH3     | ENST00000376757.5 |
| XPNPEP3  | ENST00000357137.4 |
| BNIP3L   | ENST00000380629.2 |
| TNPO3    | ENST00000393245.1 |
| ATP11B   | ENST00000323116.5 |
| MGLL     | ENST00000434178.2 |
| IWS1     | ENST00000295321.4 |
| NDUFA10  | ENST00000252711.2 |
| REST     | ENST00000309042.7 |
| GPRC5A   | ENST00000014914.5 |
| ASIC1    | ENST00000228468.4 |
| PIGV     | ENST00000078527.4 |
| ZNF490   | ENST00000311437.6 |
| POLR1A   | ENST00000263857.6 |
| RUNX1    | ENST00000344691.4 |
| MCOLN2   | ENST00000370608.3 |
| LAMTOR3  | ENST00000499666.2 |
| RMND5A   | ENST00000283632.4 |
| RIMKLA   | ENST00000431473.3 |
| RHOF     | ENST00000267205.2 |
| CHMP3    | ENST00000263856.4 |
| REPS2    | ENST00000357277.3 |
| SYTL3    | ENST00000367081.3 |
| SLC12A6  | ENST00000397707.2 |
| TOMM20   | ENST00000366607.4 |
| ZER1     | ENST00000291900.2 |
| TAF1B    | ENST00000263663.5 |
| C19orf40 | ENST00000588258.1 |
| KPNA3    | ENST00000261667.3 |
| MRO      | ENST00000428869.2 |
| WDFY2    | ENST00000298125.5 |
| DECR1    | ENST00000220764.2 |
| MARCKS   | ENST00000368635.4 |
| POLM     | ENST00000335195.6 |

|              |                   |
|--------------|-------------------|
| LTBP2        | ENST00000261978.4 |
| GNB4         | ENST00000232564.3 |
| MSANTD3      | ENST00000395067.2 |
| DICER1       | ENST00000541352.1 |
| EPC1         | ENST00000319778.6 |
| PLXNA3       | ENST00000369682.3 |
| KCTD20       | ENST00000373731.2 |
| SLC30A2      | ENST00000374278.3 |
| TBC1D24      | ENST00000567020.1 |
| USH1G        | ENST00000319642.1 |
| MYH15        | ENST00000273353.3 |
| RNF103-CHMP3 | ENST00000604011.1 |
| IL17REL      | ENST00000389983.2 |
| CDC14B       | ENST00000265659.2 |
| RAB37        | ENST00000392610.1 |
| ATF3         | ENST00000366983.1 |
| DST          | ENST00000312431.6 |
| SLFN13       | ENST00000285013.6 |
| CCDC170      | ENST00000239374.7 |
| ADAMTS15     | ENST00000299164.2 |
| CNTN2        | ENST00000331830.4 |
| WEE1         | ENST00000299613.6 |
| CELF6        | ENST00000287202.5 |
| MAPT         | ENST00000344290.5 |
| FAM189A1     | ENST00000261275.4 |
| SEPT8        | ENST00000378706.1 |
| TBC1D10A     | ENST00000215790.7 |
| BAZ1B        | ENST00000339594.4 |
| JPH2         | ENST00000372980.3 |
| PDGFRB       | ENST00000261799.4 |
| MAPKBP1      | ENST00000457542.2 |
| MMP14        | ENST00000311852.6 |
| RUFY4        | ENST00000441828.2 |
| ZNF618       | ENST00000288466.7 |
| B3GALTL      | ENST00000343307.4 |
| NSMF         | ENST00000339554.3 |
| ZNF324       | ENST00000536459.2 |
| VANGL1       | ENST00000355485.2 |
| TUBGCP4      | ENST00000564079.1 |
| NT5DC1       | ENST00000319550.4 |
| HIST1H2AH    | ENST00000377459.1 |
| EEPD1        | ENST00000242108.4 |
| SMCR8        | ENST00000406438.3 |
| EMP2         | ENST00000359543.3 |
| HOXD12       | ENST00000404162.2 |
| CASP10       | ENST00000360132.3 |
| XRCC3        | ENST00000554913.1 |
| TBC1D8B      | ENST00000357242.5 |
| TTF2         | ENST00000369466.4 |
| PYG01        | ENST00000302000.6 |
| COBLL1       | ENST00000375458.2 |
| ACPL2        | ENST00000286353.4 |
| TNKS2        | ENST00000371627.4 |
| TRNAU1AP     | ENST00000373830.3 |



|             |                   |
|-------------|-------------------|
| DGKI        | ENST00000453654.2 |
| COL5A1      | ENST00000371817.3 |
| TMEM167A    | ENST00000502346.1 |
| EMP1        | ENST00000256951.5 |
| ADARB2      | ENST00000381312.1 |
| DENND5B     | ENST00000389082.5 |
| STARD5      | ENST00000302824.6 |
| MICA        | ENST00000449934.2 |
| DRG1        | ENST00000331457.4 |
| NANOS1      | ENST00000425699.1 |
| UQCRFS1     | ENST00000304863.4 |
| FRZB        | ENST00000295113.4 |
| TNIK        | ENST00000436636.2 |
| FADS1       | ENST00000350997.7 |
| RANBP3      | ENST00000439268.2 |
| TMED10      | ENST00000303575.4 |
| KIAA0368    | ENST00000338205.5 |
| CHURC1-FNTB | ENST00000549987.1 |
| DNAJB13     | ENST00000339764.1 |
| EXOC2       | ENST00000230449.4 |
| ADARB1      | ENST00000539173.1 |
| SLC25A37    | ENST00000519973.1 |
| AP4M1       | ENST00000359593.4 |
| STX17       | ENST00000259400.6 |
| EMC3        | ENST00000245046.2 |
| CENPP       | ENST00000375587.3 |
| ST3GAL1     | ENST00000319914.5 |
| PPP5C       | ENST00000012443.4 |
| SLC11A2     | ENST00000262051.7 |
| MRPS14      | ENST00000476371.1 |
| UQCRB       | ENST00000287022.5 |
| PTBP2       | ENST00000609116.1 |
| CDC6        | ENST00000209728.4 |
| POLE        | ENST00000320574.5 |
| TK2         | ENST00000299697.7 |
| MFSO6       | ENST00000392328.1 |
| IP6K1       | ENST00000468463.1 |
| RFTN2       | ENST00000295049.4 |
| EFNA3       | ENST00000505139.1 |
| CPPED1      | ENST00000381774.4 |
| PET112      | ENST00000263985.6 |
| CCDC153     | ENST00000503566.2 |
| BICD2       | ENST00000356884.6 |
| GPATCH4     | ENST00000368232.4 |
| OSBPL8      | ENST00000393249.2 |
| COA5        | ENST00000328709.3 |
| FKBP7       | ENST00000424785.2 |
| ABCG8       | ENST00000272286.2 |
| ING2        | ENST00000302327.3 |
| ANKH        | ENST00000284268.6 |
| C8orf46     | ENST00000522977.1 |
| ADAL        | ENST00000428046.3 |
| LMAN2L      | ENST00000264963.4 |
| UBE2V2      | ENST00000523111.2 |

|          |                    |
|----------|--------------------|
| MKI67    | ENST00000368653.3  |
| TRAPPC2L | ENST00000565504.1  |
| PAPD5    | ENST00000357464.3  |
| C2orf29  | ENST00000407472.1  |
| PITPNC1  | ENST00000580974.1  |
| TRABD2B  | ENST00000606738.2  |
| RASAL2   | ENST00000448150.3  |
| MRPL46   | ENST00000312475.4  |
| RAPGEF3  | ENST00000405493.2  |
| TPBG     | ENST00000369750.3  |
| FRMD4A   | ENST00000358621.4  |
| UBR5     | ENST00000520539.1  |
| TUSC2    | ENST00000232496.4  |
| EHD1     | ENST00000320631.3  |
| ROBO2    | ENST00000461745.1  |
| ROCK2    | ENST00000315872.6  |
| SRGAP3   | ENST00000383836.3  |
| ZNF180   | ENST00000391956.4  |
| FIBCD1   | ENST00000448616.1  |
| AGBL3    | ENST00000359383.3  |
| KPNB1    | ENST00000290158.4  |
| SOAT1    | ENST00000367619.3  |
| GLIS3    | ENST00000324333.10 |
| DDX52    | ENST00000349699.2  |
| RANBP2   | ENST00000283195.6  |
| ZNF695   | ENST00000487338.2  |
| PARG     | ENST00000402038.3  |
| NGFRAP1  | ENST00000361298.4  |
| ST3GAL6  | ENST00000265261.6  |
| UBE2A    | ENST00000371558.2  |
| PKLR     | ENST00000392414.3  |
| ANO7     | ENST00000274979.8  |
| SMIM1    | ENST00000444870.2  |
| C6orf211 | ENST00000367294.3  |
| PRPSAP1  | ENST00000446526.3  |
| PLEKHG3  | ENST00000247226.7  |
| UMPS     | ENST00000232607.2  |
| BUB1     | ENST00000535254.1  |
| ZNF827   | ENST00000379448.4  |
| MRPL30   | ENST00000338148.3  |
| C2orf15  | ENST00000512183.2  |
| DNAJB5   | ENST00000545841.1  |
| MBD5     | ENST00000407073.1  |
| ZDHHC24  | ENST00000310442.3  |
| SOCS7    | ENST00000577233.1  |
| LNX1     | ENST00000306888.2  |
| SRD5A3   | ENST00000264228.4  |
| SRCAP    | ENST00000262518.4  |
| RAB3GAP2 | ENST00000358951.2  |
| SMNDC1   | ENST00000369603.5  |
| SLIT1    | ENST00000371070.4  |
| ARID1B   | ENST00000346085.5  |
| SLC44A1  | ENST00000374720.3  |
| WSB2     | ENST00000315436.3  |

|           |                   |
|-----------|-------------------|
| PCCB      | ENST00000469217.1 |
| SLC30A9   | ENST00000264451.7 |
| ZNF283    | ENST00000324461.7 |
| ESF1      | ENST00000202816.1 |
| MRPS30    | ENST00000507110.1 |
| ZNF622    | ENST00000308683.2 |
| FAM105A   | ENST00000274217.3 |
| DYRK2     | ENST00000344096.3 |
| MAD2L1    | ENST00000296509.6 |
| C15orf40  | ENST00000304177.5 |
| LPAR2     | ENST00000586703.1 |
| TIFA      | ENST00000361717.3 |
| FAM227A   | ENST00000535113.1 |
| ABCB1     | ENST00000265724.3 |
| SFSWAP    | ENST00000261674.4 |
| CADPS2    | ENST00000334010.7 |
| THUMPD2   | ENST00000505747.1 |
| TM9SF3    | ENST00000371142.4 |
| FAM126A   | ENST00000409923.1 |
| GNG7      | ENST00000382159.3 |
| TSKU      | ENST00000333090.4 |
| CSTF2T    | ENST00000331173.4 |
| SERINC1   | ENST00000339697.4 |
| LIPT2     | ENST00000310109.4 |
| GALC      | ENST00000261304.2 |
| HAT1      | ENST00000392584.1 |
| CHD1      | ENST00000284049.3 |
| HOXB13    | ENST00000290295.7 |
| RAB3B     | ENST00000371655.3 |
| HDAC5     | ENST00000225983.6 |
| ASCC3     | ENST00000369162.2 |
| PKP4      | ENST00000389757.3 |
| B3GALT1   | ENST00000392690.3 |
| GLG1      | ENST00000422840.2 |
| C11orf1   | ENST00000260276.3 |
| UVRAG     | ENST00000356136.3 |
| CCDC93    | ENST00000376300.2 |
| COLGALT2  | ENST00000367521.1 |
| SRFBP1    | ENST00000339397.4 |
| KLRG2     | ENST00000340940.4 |
| TEX2      | ENST00000258991.3 |
| TNFRSF13C | ENST00000291232.3 |
| BTRC      | ENST00000370187.3 |
| AGO3      | ENST00000373191.4 |
| GLUD1     | ENST00000277865.4 |
| BRCC3     | ENST00000369462.1 |
| ATF6      | ENST00000367942.3 |
| TSPAN31   | ENST00000547992.1 |
| DYRK3     | ENST00000367108.3 |
| NPY4R     | ENST00000374312.1 |
| ZNF223    | ENST00000434772.3 |
| TOX3      | ENST00000407228.3 |
| DDX6      | ENST00000264018.4 |
| ARIH1     | ENST00000379887.4 |

|                |                   |
|----------------|-------------------|
| CD248          | ENST00000311330.3 |
| STAMBPL1       | ENST00000371926.3 |
| SLC27A4        | ENST00000300456.4 |
| PERP           | ENST00000421351.3 |
| GFRA1          | ENST00000439649.3 |
| ST5            | ENST00000526757.1 |
| QPRT           | ENST00000395384.4 |
| LIPG           | ENST00000261292.4 |
| OPN3           | ENST00000366554.2 |
| LMOD1          | ENST00000367288.4 |
| HHIPL1         | ENST00000330710.5 |
| PNPO           | ENST00000225573.4 |
| INPP4A         | ENST00000409016.4 |
| EFHC1          | ENST00000371068.5 |
| UBE2D3         | ENST00000453744.2 |
| ZNF613         | ENST00000293471.6 |
| EXO1           | ENST00000518483.1 |
| FAM179A        | ENST00000379558.4 |
| TMEFF2         | ENST00000392314.1 |
| NUDT9          | ENST00000473942.1 |
| KLHL4          | ENST00000373119.4 |
| HERPUD2        | ENST00000396081.1 |
| CABLES1        | ENST00000256925.7 |
| PHB2           | ENST00000546111.1 |
| GTF2A2         | ENST00000396060.2 |
| COX15          | ENST00000016171.5 |
| AZI2           | ENST00000479665.1 |
| NFIX           | ENST00000360105.4 |
| HNRNPA3        | ENST00000411529.2 |
| PHF5A          | ENST00000216252.3 |
| C7orf55-LUC7L2 | ENST00000354926.4 |
| CYTH2          | ENST00000427476.1 |
| TTLL1          | ENST00000331018.7 |
| FAM149B1       | ENST00000242505.6 |
| LRRC27         | ENST00000392638.2 |
| RSRC2          | ENST00000331738.7 |
| ARL1           | ENST00000261636.8 |
| ZBTB11         | ENST00000312938.4 |
| ANXA6          | ENST00000354546.5 |
| CADM1          | ENST00000452722.3 |
| TRMT10C        | ENST00000309922.6 |
| SDC3           | ENST00000336798.7 |
| CHRM3          | ENST00000255380.4 |
| NAGS           | ENST00000293404.3 |
| EHD4           | ENST00000220325.4 |
| CNOT6L         | ENST00000504123.1 |
| ZNF639         | ENST00000326361.3 |
| STX3           | ENST00000535361.1 |
| SOX11          | ENST00000322002.3 |
| KCNK1          | ENST00000366621.3 |
| NSL1           | ENST00000422588.2 |
| CYP4F12        | ENST00000550308.1 |
| ZFYVE9         | ENST00000371591.1 |
| ETV1           | ENST00000430479.1 |

|          |                   |
|----------|-------------------|
| ALG14    | ENST00000370205.5 |
| PDXK     | ENST00000468090.1 |
| PSMG4    | ENST00000473000.2 |
| RPL13    | ENST00000393099.3 |
| SORBS3   | ENST00000240123.7 |
| MLTK     | ENST00000375213.3 |
| TMED7    | ENST00000456936.3 |
| ETS2     | ENST00000360214.3 |
| TPGS2    | ENST00000334295.4 |
| APC      | ENST00000457016.1 |
| COG6     | ENST00000455146.3 |
| ATOH8    | ENST00000306279.3 |
| BAMBI    | ENST00000375533.3 |
| SGIP1    | ENST00000371036.3 |
| LRP12    | ENST00000424843.2 |
| LUC7L2   | ENST00000541515.3 |
| MED6     | ENST00000440435.2 |
| RAB24    | ENST00000393611.2 |
| SNRPG    | ENST00000454893.1 |
| ZNF177   | ENST00000541595.2 |
| RASA1    | ENST00000456692.2 |
| PPM1H    | ENST00000228705.6 |
| SCARB2   | ENST00000264896.2 |
| POLR1E   | ENST00000377798.4 |
| ERG      | ENST00000398905.1 |
| RNASET2  | ENST00000366855.6 |
| CTNBL1   | ENST00000361383.6 |
| DCTN6    | ENST00000221114.3 |
| HADHA    | ENST00000380649.3 |
| IFT57    | ENST00000264538.3 |
| HSPA2    | ENST00000394709.1 |
| MSH5     | ENST00000534153.4 |
| CEP72    | ENST00000444221.1 |
| TSPAN14  | ENST00000429989.3 |
| CDS2     | ENST00000460006.1 |
| MGMT     | ENST00000306010.7 |
| CCDC77   | ENST00000239830.4 |
| NTPCR    | ENST00000366628.5 |
| RBM15B   | ENST00000323686.4 |
| HIC2     | ENST00000407464.2 |
| DNTTIP2  | ENST00000436063.2 |
| RAB6B    | ENST00000285208.4 |
| SH3GLB1  | ENST00000370558.4 |
| SMU1     | ENST00000397149.3 |
| ZCCHC11  | ENST00000257177.4 |
| TOR1AIP2 | ENST00000367612.3 |
| EHD3     | ENST00000322054.5 |
| CENPF    | ENST00000366955.3 |
| RAB40B   | ENST00000571995.1 |
| CLN8     | ENST00000331222.4 |
| ANKS6    | ENST00000375018.1 |
| HAUS3    | ENST00000243706.4 |
| SPIRE1   | ENST00000409402.4 |
| EIF2B5   | ENST00000273783.3 |

|          |                   |
|----------|-------------------|
| NLE1     | ENST00000586869.1 |
| VPS33A   | ENST00000267199.4 |
| ARHGAP29 | ENST00000260526.6 |
| PMPCB    | ENST00000249269.4 |
| KHNYN    | ENST00000251343.5 |
| ZBTB3    | ENST00000394807.3 |
| MAST2    | ENST00000361297.2 |
| TOMM40   | ENST00000592434.1 |
| PPARG    | ENST00000397000.1 |
| CAPN2    | ENST00000295006.5 |
| CHSY1    | ENST00000254190.3 |
| KIAA0141 | ENST00000194118.4 |
| CASK     | ENST00000421587.2 |
| RAB32    | ENST00000367495.3 |
| CNBP     | ENST00000502976.1 |
| MGAT1    | ENST00000333055.3 |
| MAPKAPK5 | ENST00000550735.2 |
| LEF1     | ENST00000265165.1 |
| PPIL4    | ENST00000340881.2 |
| ABHD5    | ENST00000458276.2 |
| PIAS2    | ENST00000585916.1 |
| PCDHB2   | ENST00000194155.4 |
| APLP2    | ENST00000263574.5 |
| TRMT61A  | ENST00000389749.4 |
| CRTAP    | ENST00000320954.6 |
| GRK5     | ENST00000392870.2 |
| METTL10  | ENST00000368836.2 |
| ZC3H14   | ENST00000251038.5 |
| JTB      | ENST00000271843.4 |
| RARA     | ENST00000425707.3 |
| MESDC2   | ENST00000261758.4 |
| HSBP1    | ENST00000433866.2 |
| EIF1B    | ENST00000232905.3 |
| ZBTB17   | ENST00000375743.4 |
| TMEM220  | ENST00000341871.3 |
| SLC2A12  | ENST00000275230.5 |
| TRIP4    | ENST00000261884.3 |
| CA5B     | ENST00000454127.2 |
| RBM18    | ENST00000417201.3 |
| COX20    | ENST00000411948.2 |
| TIAL1    | ENST00000369093.2 |
| SMYD2    | ENST00000366957.5 |
| ZNF749   | ENST00000334181.4 |
| DDI2     | ENST00000480945.1 |
| GRHPR    | ENST00000318158.6 |
| YTHDC1   | ENST00000344157.4 |
| MCM10    | ENST00000378694.1 |
| CYB5R1   | ENST00000367249.4 |
| LMAN1    | ENST00000251047.5 |
| C4orf32  | ENST00000309733.5 |
| MTL5     | ENST00000255087.5 |
| ZBTB20   | ENST00000462705.1 |
| KLHL5    | ENST00000261425.3 |
| FOXN3    | ENST00000345097.4 |

|          |                   |
|----------|-------------------|
| CARHSP1  | ENST00000396593.2 |
| C19orf47 | ENST00000582783.1 |
| VSTM4    | ENST00000332853.4 |
| TLN2     | ENST00000561311.1 |
| FKBP4    | ENST00000001008.4 |
| ARHGAP18 | ENST00000368149.2 |
| PANX1    | ENST00000227638.3 |
| UBE2T    | ENST00000367274.4 |
| HEY2     | ENST00000368365.1 |
| GTF2F1   | ENST00000394456.5 |
| CENPM    | ENST00000404067.1 |
| MLLT3    | ENST00000380338.4 |
| ZNF446   | ENST00000335841.4 |
| C12orf52 | ENST00000548278.1 |
| STRBP    | ENST00000447404.2 |
| PQLC2    | ENST00000375155.3 |
| YARS2    | ENST00000324868.8 |
| UBD      | ENST00000377050.4 |
| BTBD1    | ENST00000379403.2 |
| ZSCAN2   | ENST00000541040.1 |
| CNOT7    | ENST00000361272.4 |
| PMPCA    | ENST00000371717.3 |
| CEP63    | ENST00000337090.3 |
| RHBDL3   | ENST00000269051.4 |
| TRAF3IP2 | ENST00000368761.5 |
| MRPL2    | ENST00000487429.1 |
| EXD2     | ENST00000409018.3 |
| MTHFD1   | ENST00000216605.8 |
| ARL3     | ENST00000260746.5 |
| PSMB5    | ENST00000493471.2 |
| GPR124   | ENST00000315215.7 |
| HIF1A    | ENST00000323441.6 |
| HAS2     | ENST00000303924.4 |
| MAGIX    | ENST00000376338.3 |
| ZNF736   | ENST00000423484.2 |
| TLX1     | ENST00000467928.2 |
| OIP5     | ENST00000220514.3 |
| TRIP13   | ENST00000166345.3 |
| ITGA11   | ENST00000423218.2 |
| INF2     | ENST00000392634.4 |
| MESP1    | ENST00000300057.4 |
| TOMM6    | ENST00000398884.3 |
| SIPA1L1  | ENST00000555818.1 |
| BRD3     | ENST00000303407.7 |
| MIIP     | ENST00000235332.4 |
| ADSL     | ENST00000216194.7 |
| CKAP4    | ENST00000378026.4 |
| ARID2    | ENST00000457135.1 |
| NUPL2    | ENST00000258742.5 |
| FASTKD2  | ENST00000236980.6 |
| PTGS1    | ENST00000362012.2 |
| DNPEP    | ENST00000273075.4 |
| ANKRD9   | ENST00000559651.1 |
| VLDLR    | ENST00000382100.3 |

|               |                    |
|---------------|--------------------|
| ITGB5         | ENST00000296181.4  |
| RP11-706015.1 | ENST00000425492.2  |
| RPP30         | ENST00000413330.1  |
| MSRB1         | ENST00000399753.2  |
| FOXE1         | ENST00000375123.3  |
| ARHGAP20      | ENST00000260283.4  |
| PGK1          | ENST00000373316.4  |
| EBNA1BP2      | ENST00000431635.2  |
| FOXD1         | ENST00000499003.3  |
| SGOL1         | ENST00000442720.1  |
| USP9X         | ENST00000324545.8  |
| DVL3          | ENST00000313143.3  |
| MSX2          | ENST00000239243.6  |
| RNF214        | ENST00000530849.1  |
| VAPA          | ENST00000400000.2  |
| MED16         | ENST00000269814.4  |
| POU4F1        | ENST00000377208.5  |
| USP3          | ENST00000380324.3  |
| TYMS          | ENST00000323274.10 |
| CCDC59        | ENST00000256151.7  |
| KNSTRN        | ENST00000608100.1  |
| IAH1          | ENST00000470914.1  |
| CNTNAP5       | ENST00000431078.1  |
| CNNM2         | ENST00000369878.4  |
| ACP6          | ENST00000369238.6  |
| MEF2C         | ENST00000340208.5  |
| CETN3         | ENST00000283122.3  |
| PAK4          | ENST00000599386.1  |
| SLC43A2       | ENST00000301335.5  |
| VPS18         | ENST00000220509.5  |
| WDR37         | ENST00000358220.1  |
| RTF1          | ENST00000389629.4  |
| SART3         | ENST00000228284.3  |
| METTL22       | ENST00000381920.3  |
| TIGD6         | ENST00000296736.3  |
| BAG1          | ENST00000472232.3  |
| CMBL          | ENST00000296658.3  |
| PLA2G12A      | ENST00000243501.5  |
| VTA1          | ENST00000367630.4  |
| ARL14EP       | ENST00000282032.3  |
| OBFC1         | ENST00000224950.3  |
| ID3           | ENST00000374561.5  |
| SSR1          | ENST00000244763.4  |
| PLEKHG1       | ENST00000367328.1  |
| RRP1          | ENST00000497547.1  |
| GSTM3         | ENST00000540225.1  |
| MGAT2         | ENST00000305386.2  |
| CMC1          | ENST00000466830.1  |
| STK16         | ENST00000409638.3  |
| URGCP         | ENST00000223341.7  |
| ANKLE2        | ENST00000539605.1  |
| FUT10         | ENST00000327671.5  |
| AMACR         | ENST00000335606.6  |
| PARL          | ENST00000317096.4  |



|         |                   |
|---------|-------------------|
| MTG2    | ENST00000370823.3 |
| WIPI2   | ENST00000288828.4 |
| AKR7A2  | ENST00000235835.3 |
| POLR2C  | ENST00000219252.5 |
| CDH11   | ENST00000394156.3 |
| ABCG1   | ENST00000398457.2 |
| UROS    | ENST00000368797.4 |
| ZMAT2   | ENST00000274712.3 |
| NAT10   | ENST00000257829.3 |
| LONP2   | ENST00000285737.4 |
| HAUS8   | ENST00000253669.5 |
| CHRNA5  | ENST00000299565.5 |
| POU6F1  | ENST00000389243.4 |
| PAQR3   | ENST00000512733.1 |
| PEX7    | ENST00000541292.1 |
| SNAP47  | ENST00000366760.1 |
| HEXIM2  | ENST00000307275.3 |
| TMED3   | ENST00000299705.5 |
| UBE2F   | ENST00000272930.4 |
| MLPH    | ENST00000264605.3 |
| DNLZ    | ENST00000371739.3 |
| GRID1   | ENST00000327946.7 |
| NDUFV3  | ENST00000340344.4 |
| GPKOW   | ENST00000156109.5 |
| GABRB1  | ENST00000295454.3 |
| KNCN    | ENST00000481882.2 |
| CSE1L   | ENST00000262982.2 |
| SART1   | ENST00000312397.5 |
| NUDT21  | ENST00000300291.5 |
| LMNB2   | ENST00000325327.3 |
| GNG11   | ENST00000248564.5 |
| C2orf68 | ENST00000306336.5 |
| PAX6    | ENST00000419022.1 |
| MAPK14  | ENST00000229795.3 |
| AGPAT6  | ENST00000396987.3 |
| TMEM98  | ENST00000579849.1 |
| TCF21   | ENST00000367882.4 |
| CALML4  | ENST00000395465.3 |
| TXNRD3  | ENST00000518740.1 |
| SF3B3   | ENST00000302516.5 |
| NCKAP1  | ENST00000361354.4 |
| DOCK7   | ENST00000251157.5 |
| DHX34   | ENST00000328771.4 |
| PACS2   | ENST00000447393.1 |
| TXNL1   | ENST00000217515.6 |
| MSH3    | ENST00000265081.6 |
| FTO     | ENST00000471389.1 |
| C3orf17 | ENST00000314400.5 |
| TCEB3   | ENST00000418390.2 |
| CD59    | ENST00000395850.3 |
| GEMIN4  | ENST00000319004.5 |
| AHSA2   | ENST00000394457.3 |
| MORF4L1 | ENST00000331268.5 |
| IMPA1   | ENST00000311489.4 |

|          |                   |
|----------|-------------------|
| ODF2L    | ENST00000370566.3 |
| CAMK2N1  | ENST00000375078.3 |
| SERPINA4 | ENST00000555095.1 |
| DGAT1    | ENST00000332324.4 |
| CRNKL1   | ENST00000377327.4 |
| NARS     | ENST00000256854.5 |
| TMX1     | ENST00000457354.2 |
| MED31    | ENST00000225728.3 |
| DUSP6    | ENST00000279488.7 |
| TF       | ENST00000402696.3 |
| FBXO33   | ENST00000298097.7 |
| HMX1     | ENST00000400677.3 |
| BOD1     | ENST00000311086.4 |
| GRSF1    | ENST00000254799.6 |
| AGBL5    | ENST00000323064.8 |
| CREBL2   | ENST00000228865.2 |
| SLC35E3  | ENST00000398004.2 |
| GIMAP6   | ENST00000493969.1 |
| ATP2B2   | ENST00000352432.4 |
| TMEM67   | ENST00000453321.3 |
| NETO2    | ENST00000562435.1 |
| PAPD4    | ENST00000453514.1 |
| IPPK     | ENST00000287996.3 |
| IQGAP2   | ENST00000274364.6 |
| IARS2    | ENST00000366922.1 |
| BRE      | ENST00000379632.2 |
| PNRC1    | ENST00000336032.3 |
| PTDSS2   | ENST00000308020.5 |
| GHSR     | ENST00000241256.2 |
| RFT1     | ENST00000296292.3 |
| TRA2B    | ENST00000453386.2 |
| ENAH     | ENST00000366844.3 |
| RNF213   | ENST00000582970.1 |
| TRIM11   | ENST00000493030.2 |
| CHORDC1  | ENST00000320585.6 |
| PKHD1    | ENST00000371117.3 |
| AGTPBP1  | ENST00000376083.3 |
| RANBP6   | ENST00000259569.5 |
| HNRNPLL  | ENST00000449105.3 |
| NBN      | ENST00000265433.3 |
| STAU2    | ENST00000522695.1 |
| SIGLEC5  | ENST00000599649.1 |
| FRA10AC1 | ENST00000536233.1 |
| MRPS23   | ENST00000313608.8 |
| OR7A5    | ENST00000594432.1 |
| GSK3B    | ENST00000264235.8 |
| CTSV     | ENST00000259470.5 |
| TRMU     | ENST00000381019.3 |
| YLPM1    | ENST00000552421.1 |
| GNPTG    | ENST00000204679.4 |
| FUT4     | ENST00000358752.2 |
| UGGT2    | ENST00000376747.3 |
| SLC35A5  | ENST00000492406.1 |
| GPR137C  | ENST00000321662.6 |

|         |                   |
|---------|-------------------|
| DIP2A   | ENST00000318711.7 |
| SMAD6   | ENST00000288840.5 |
| FCHSD1  | ENST00000435817.2 |
| EXT1    | ENST00000378204.2 |
| TROAP   | ENST00000257909.3 |
| DYRK1A  | ENST00000339659.4 |
| LGALS1  | ENST00000215909.5 |
| IBSP    | ENST00000226284.5 |
| GRIN2A  | ENST00000562109.1 |
| NAALAD2 | ENST00000534061.1 |
| G6PC2   | ENST00000421979.1 |
| CTNND1  | ENST00000524630.1 |
| GSG1    | ENST00000396302.3 |
| LRRC6   | ENST00000519595.1 |
| GPR34   | ENST00000378142.4 |
| KLHL36  | ENST00000564996.1 |
| C9orf3  | ENST00000297979.5 |
| C3      | ENST00000245907.6 |
| E2F1    | ENST00000343380.5 |
| TMEM233 | ENST00000426426.1 |
| C6orf25 | ENST00000375810.4 |
| PPID    | ENST00000307720.3 |
| IL5RA   | ENST00000438560.1 |
| GPR137B | ENST00000366592.3 |
| DUSP1   | ENST00000239223.3 |
| TFG     | ENST00000240851.4 |
| GNB1L   | ENST00000329517.6 |
| GRAP2   | ENST00000344138.4 |
| SPIC    | ENST00000551346.1 |
| ACTR3   | ENST00000263238.2 |
| SLC2A1  | ENST00000426263.3 |
| PFKM    | ENST00000312352.7 |
| PHYH    | ENST00000396913.2 |
| SLFN12L | ENST00000260908.7 |
| AKR1C4  | ENST00000380448.1 |
| MB      | ENST00000401702.1 |
| BSND    | ENST00000371265.4 |
| DLK1    | ENST00000341267.4 |
| NPSR1   | ENST00000381539.3 |
| TNIP3   | ENST00000507879.1 |
| CYP2C19 | ENST00000371321.3 |
| PRH2    | ENST00000396400.3 |
| PHF19   | ENST00000373896.3 |
| EMC10   | ENST00000376918.3 |
| RUNDC1  | ENST00000361677.1 |
| CCNB1   | ENST00000256442.5 |
| TRAPPC8 | ENST00000283351.4 |
| NCKIPSD | ENST00000416649.2 |
| SEC16B  | ENST00000308284.6 |
| CRP     | ENST00000255030.5 |
| ZFP62   | ENST00000512132.1 |
| CLPP    | ENST00000596605.1 |
| TG      | ENST00000519543.1 |
| P2RY10  | ENST00000171757.2 |

|               |                    |
|---------------|--------------------|
| OR2A4         | ENST00000315453.2  |
| RCL1          | ENST00000381750.4  |
| DNAH9         | ENST00000262442.4  |
| SLC2A9        | ENST00000264784.3  |
| CDH19         | ENST00000540086.1  |
| MBL2          | ENST00000373968.3  |
| C18orf42      | ENST00000580650.1  |
| CD1C          | ENST00000368170.3  |
| PPWD1         | ENST00000261308.5  |
| BTAF1         | ENST00000265990.6  |
| MRPL12        | ENST00000333676.3  |
| FPR1          | ENST00000595042.1  |
| RAB18         | ENST00000356940.6  |
| SERPINA7      | ENST00000327674.4  |
| AAGAB         | ENST00000261880.5  |
| HAAO          | ENST00000294973.6  |
| LMF1          | ENST00000262301.11 |
| WNT1          | ENST00000293549.3  |
| GSC2          | ENST00000086933.2  |
| GLYAT         | ENST00000344743.3  |
| IL1RAPL1      | ENST00000378993.1  |
| ZNF763        | ENST00000590798.1  |
| PELP1         | ENST00000574876.1  |
| LSM14A        | ENST00000433627.5  |
| LRRC4C        | ENST00000278198.2  |
| METTL24       | ENST00000338882.4  |
| PODNL1        | ENST00000538517.2  |
| MGAT4C        | ENST00000604798.1  |
| RPS23         | ENST00000296674.8  |
| ADORA3        | ENST00000369716.4  |
| TRIM55        | ENST00000276573.7  |
| CNPPD1        | ENST00000360507.5  |
| PCSK9         | ENST00000302118.5  |
| BCL2L15       | ENST00000393316.3  |
| ANGPTL1       | ENST00000234816.2  |
| TSC22D2       | ENST00000361875.3  |
| ATHL1         | ENST00000409548.2  |
| ZMYM4         | ENST00000314607.6  |
| GTF3C2        | ENST00000359541.2  |
| TGFBI         | ENST00000442011.2  |
| FHL5          | ENST00000541107.1  |
| QDPR          | ENST00000508623.1  |
| SP3           | ENST00000310015.6  |
| THAP7         | ENST00000215742.4  |
| GABRR2        | ENST00000402938.3  |
| AQP6          | ENST00000315520.5  |
| MKKS          | ENST00000347364.3  |
| RP11-867G23.8 | ENST00000531602.1  |
| ZNF699        | ENST00000591998.1  |
| ERBB3         | ENST00000267101.3  |
| KCNH1         | ENST00000271751.4  |
| PCDH11X       | ENST00000504220.2  |
| RP11-73M18.2  | ENST00000472726.2  |
| TSPAN33       | ENST00000289407.4  |

|          |                   |
|----------|-------------------|
| MSH2     | ENST00000233146.2 |
| SND1     | ENST00000354725.3 |
| FOXK2    | ENST00000335255.5 |
| NSMCE1   | ENST00000361439.4 |
| CDR1     | ENST00000370532.2 |
| CENPH    | ENST00000283006.2 |
| TP53BP2  | ENST00000391878.2 |
| ECHDC3   | ENST00000379215.4 |
| GPR22    | ENST00000304402.4 |
| PF4      | ENST00000296029.3 |
| ZFP36L2  | ENST00000282388.3 |
| MLIP     | ENST00000274897.5 |
| EGF      | ENST00000265171.5 |
| DNASE1L3 | ENST00000486455.1 |
| IFT74    | ENST00000380062.5 |
| EVI2A    | ENST00000461237.1 |
| COLEC10  | ENST00000332843.2 |
| MAMDC4   | ENST00000317446.2 |
| FAM181B  | ENST00000329203.3 |
| CRISP1   | ENST00000335847.4 |
| HDAC2    | ENST00000519065.1 |
| BMP10    | ENST00000295379.1 |
| CD63     | ENST00000548898.1 |
| ANKHD1   | ENST00000360839.2 |
| ANGPT4   | ENST00000381922.3 |
| FNDC5    | ENST00000496770.1 |
| ASB15    | ENST00000451558.1 |
| MT1F     | ENST00000334350.6 |
| GPR78    | ENST00000382487.4 |
| SARS     | ENST00000369923.4 |
| CLEC17A  | ENST00000417570.1 |
| TLR4     | ENST00000355622.6 |
| RCN2     | ENST00000394885.3 |
| ATG2A    | ENST00000421419.2 |
| FAAH     | ENST00000243167.8 |
| CYTIP    | ENST00000264192.3 |
| TYRP1    | ENST00000388918.5 |
| NLRP9    | ENST00000332836.2 |
| CD180    | ENST00000256447.4 |
| EHF      | ENST00000257831.3 |
| DLD      | ENST00000205402.5 |
| GALNT8   | ENST00000252318.2 |
| COLEC11  | ENST00000236693.7 |
| ARL6IP6  | ENST00000326446.5 |
| NBPF24   | ENST00000369226.3 |
| LAIR1    | ENST00000391743.3 |
| ATIC     | ENST00000236959.9 |
| SHC3     | ENST00000375835.4 |
| MYO1G    | ENST00000258787.7 |
| HUWE1    | ENST00000342160.3 |
| DHX30    | ENST00000446256.2 |
| TTR      | ENST00000237014.3 |
| SRSF7    | ENST00000313117.6 |
| TUBGCP2  | ENST00000252936.3 |

|            |                   |
|------------|-------------------|
| XRCC5      | ENST00000392133.3 |
| AGAP9      | ENST00000453919.1 |
| G3BP2      | ENST00000395719.3 |
| ENPP5      | ENST00000371383.2 |
| TLR8       | ENST00000218032.6 |
| ABHD16B    | ENST00000369916.3 |
| ABCD2      | ENST00000308666.3 |
| CAPZB      | ENST00000375142.1 |
| APOB       | ENST00000233242.1 |
| FCN2       | ENST00000350339.2 |
| TRIM72     | ENST00000322122.3 |
| SLC22A18AS | ENST00000533594.1 |
| WDR77      | ENST00000235090.5 |
| BST1       | ENST00000382346.3 |
| ZBTB38     | ENST00000514251.1 |
| LTF        | ENST00000231751.4 |
| DDX53      | ENST00000327968.5 |
| PTPRF      | ENST00000372414.3 |
| NKX2-1     | ENST00000354822.5 |
| FZD8       | ENST00000374694.1 |
| QSOX1      | ENST00000367602.3 |
| MRPL22     | ENST00000523037.1 |
| GATSL2     | ENST00000426327.3 |
| CARD11     | ENST00000396946.4 |
| EMC1       | ENST00000477853.1 |
| ABCA6      | ENST00000284425.2 |
| TCP10L     | ENST00000300258.3 |
| EPS8       | ENST00000543523.1 |
| HBS1L      | ENST00000367837.5 |
| GNRHR      | ENST00000420975.2 |
| USP15      | ENST00000353364.3 |
| INSIG1     | ENST00000342407.5 |
| TCP1       | ENST00000321394.7 |
| NUDCD3     | ENST00000355451.7 |
| ZNF141     | ENST00000240499.7 |
| RANGAP1    | ENST00000405486.1 |
| TIMD4      | ENST00000274532.2 |
| TIMELESS   | ENST00000229201.4 |
| HPS4       | ENST00000398145.2 |
| SEC23B     | ENST00000336714.3 |
| RAB43      | ENST00000476465.1 |
| NDNF       | ENST00000379692.4 |
| WDR13      | ENST00000218056.5 |
| LLPH       | ENST00000266604.2 |
| LHPP       | ENST00000368839.1 |
| SLC25A4    | ENST00000281456.6 |
| C12orf79   | ENST00000549802.1 |
| LRP8       | ENST00000306052.6 |
| ADAM7      | ENST00000175238.6 |
| FAM229B    | ENST00000368656.2 |
| NUP93      | ENST00000542526.1 |
| ARGFX      | ENST00000334384.3 |
| DNAJC15    | ENST00000379221.2 |
| EIF2A      | ENST00000460851.1 |

|          |                   |
|----------|-------------------|
| RNF126   | ENST00000292363.5 |
| CRHR2    | ENST00000506074.2 |
| SOBP     | ENST00000317357.5 |
| FUS      | ENST00000254108.7 |
| TCF3     | ENST00000262965.5 |
| TMEM39A  | ENST00000319172.5 |
| MFSD12   | ENST00000398558.4 |
| SHMT1    | ENST00000316694.3 |
| WDR75    | ENST00000314761.4 |
| LRRC34   | ENST00000446859.1 |
| SMTNL2   | ENST00000338859.4 |
| LRRC2    | ENST00000395905.3 |
| EBF4     | ENST00000380648.4 |
| GPR183   | ENST00000376414.4 |
| ANKS4B   | ENST00000311620.5 |
| GGACT    | ENST00000376250.2 |
| LMCD1    | ENST00000157600.3 |
| CRMP1    | ENST00000324989.7 |
| SF3A1    | ENST00000215793.8 |
| TIMM50   | ENST00000599794.1 |
| KIAA1715 | ENST00000272748.4 |
| NRG3     | ENST00000372142.2 |
| MARCH6   | ENST00000274140.5 |
| AQP1     | ENST00000509504.1 |
| ANKFY1   | ENST00000341657.4 |
| CELF3    | ENST00000290585.4 |
| IL10RA   | ENST00000227752.3 |
| FGB      | ENST00000302068.4 |
| VCAM1    | ENST00000347652.2 |
| KLF2     | ENST00000248071.5 |
| POLD4    | ENST00000312419.3 |
| COPS8    | ENST00000354371.2 |
| FAM208A  | ENST00000493960.2 |
| RPS6KL1  | ENST00000555647.1 |
| CYFIP1   | ENST00000313077.7 |
| CLDN11   | ENST00000064724.3 |
| LRRC40   | ENST00000370952.3 |
| SPATA6L  | ENST00000381890.5 |
| DLGAP3   | ENST00000373347.1 |
| FAM213A  | ENST00000372187.5 |
| C9orf156 | ENST00000375119.3 |
| ZNF334   | ENST00000457685.2 |
| NQO2     | ENST00000338130.2 |
| ARHGAP12 | ENST00000311380.4 |
| C16orf45 | ENST00000300006.4 |
| RWDD1    | ENST00000466444.2 |
| DNAJB4   | ENST00000370763.5 |
| RPS24    | ENST00000435275.1 |
| PXK      | ENST00000463280.1 |
| LRRC49   | ENST00000260382.5 |
| CLEC4C   | ENST00000542353.1 |
| GUCY1A3  | ENST00000296518.7 |
| CPED1    | ENST00000310396.5 |
| SOX17    | ENST00000297316.4 |

|            |                   |
|------------|-------------------|
| PCNXL2     | ENST00000258229.9 |
| RNLS       | ENST00000331772.4 |
| CPVL       | ENST00000265394.5 |
| HSD11B1    | ENST00000367028.2 |
| CCRN4L     | ENST00000280614.2 |
| IFIT1      | ENST00000371804.3 |
| C11orf54   | ENST00000528288.1 |
| KIAA1551   | ENST00000312561.4 |
| DDR GK1    | ENST00000354488.3 |
| ZNF140     | ENST00000355557.2 |
| FAM120AOS  | ENST00000423591.1 |
| C8A        | ENST00000361249.3 |
| BLVRA      | ENST00000402924.1 |
| GLTSCR2    | ENST00000246802.5 |
| FAM127C    | ENST00000391440.1 |
| CHST2      | ENST00000309575.3 |
| MYH9       | ENST00000216181.5 |
| GPR56      | ENST00000388812.4 |
| PANK2      | ENST00000497424.1 |
| SOCS5      | ENST00000306503.5 |
| UQCR11     | ENST00000589880.1 |
| CFL2       | ENST00000341223.3 |
| ST20-MTHFS | ENST00000479961.1 |
| MYO1F      | ENST00000338257.8 |
| PRMT7      | ENST00000339507.5 |
| MRPL39     | ENST00000352957.4 |
| HNRNPA0    | ENST00000314940.4 |
| INTS6      | ENST00000311234.4 |
| TNFAIP8L3  | ENST00000327536.5 |
| PRPF4      | ENST00000374199.4 |
| CACNA1C    | ENST00000399655.1 |
| CYB5D2     | ENST00000301391.3 |
| CYP20A1    | ENST00000356079.4 |
| SCN1A      | ENST00000423058.2 |
| BET1       | ENST00000222547.3 |
| CD1D       | ENST00000368171.3 |
| GPR35      | ENST00000319838.5 |
| FHL2       | ENST00000409177.1 |
| N6AMT1     | ENST00000303775.5 |
| BLOC1S2    | ENST00000441611.1 |
| MSRB2      | ENST00000376510.3 |
| PLCL1      | ENST00000428675.1 |
| PRDX2      | ENST00000301522.2 |
| FGG        | ENST00000404648.3 |
| MTHFS      | ENST00000258874.3 |
| CYB5A      | ENST00000299438.9 |
| SLA        | ENST00000338087.5 |
| GPC5       | ENST00000377067.3 |
| CHRFAM7A   | ENST00000397827.3 |
| APOBEC3F   | ENST00000308521.5 |
| PCK1       | ENST00000319441.4 |
| GPI        | ENST00000415930.3 |
| LOXL2      | ENST00000389131.3 |
| PPDPF      | ENST00000370179.3 |



|          |                   |
|----------|-------------------|
| CACNA1B  | ENST00000277551.2 |
| PIK3AP1  | ENST00000339364.5 |
| GPR125   | ENST00000334304.5 |
| GPR25    | ENST00000304244.2 |
| C18orf32 | ENST00000579820.1 |
| ACE      | ENST00000290866.4 |
| PPP2R1A  | ENST00000322088.6 |
| TCEANC2  | ENST00000234827.1 |
| AKAP11   | ENST00000025301.2 |
| SYCP2L   | ENST00000283141.6 |
| BID      | ENST00000317361.7 |
| KCNQ5    | ENST00000370398.1 |
| RIT1     | ENST00000368323.3 |
| TMEM257  | ENST00000408967.2 |
| ACKR4    | ENST00000249887.2 |
| RNF41    | ENST00000345093.4 |

| Gene name                                      | 3P-seq tags + 5 |
|------------------------------------------------|-----------------|
| POU class 2 associating factor 1               | 19              |
| LIM domain containing preferred translocation  | 1894            |
| UDP-Gal:betaGlcNAc beta 1,4- galactosyltransfe | 196             |
| cytochrome P450, family 3, subfamily A, polype | 5               |
| cysteine-serine-rich nuclear protein 3         | 24              |
| chromosome 9 open reading frame 152            | 5               |
| lysophosphatidic acid receptor 6               | 5               |
| serine palmitoyltransferase, small subunit B   | 15              |
| calcium/calmodulin-dependent protein kinase IV | 73              |
| Alport syndrome, mental retardation, midface h | 5               |
| sterile alpha motif domain containing 12       | 57              |
| XK, Kell blood group complex subunit-related f | 5               |
| potassium inwardly-rectifying channel, subfami | 5               |
| pleckstrin homology domain containing, family  | 7               |
| atypical chemokine receptor 2                  | 5               |
| protein tyrosine phosphatase, receptor type, T | 5               |
| ribosomal protein L7a                          | 4327            |
| glutathione S-transferase omega 1              | 377             |
| CD209 molecule                                 | 5               |
| EH-domain containing 2                         | 2072            |
| eukaryotic translation initiation factor 4E bi | 690             |
| adiponectin, C1Q and collagen domain containin | 5               |
| guanine nucleotide binding protein (G protein) | 3695            |
| ferritin, heavy polypeptide 1                  | 15624           |
| EF-hand calcium binding domain 6               | 23              |
| D-amino acid oxidase activator                 | 5               |
| progesterone receptor membrane component 2     | 2089            |
| AP2 associated kinase 1                        | 27              |
| GSG1-like                                      | 5               |
| myotubularin related protein 1                 | 489             |
| Cbl proto-oncogene, E3 ubiquitin protein ligas | 309             |
| zinc finger protein 544                        | 173             |
| family with sequence similarity 83, member F   | 5               |
| chromosome 1 open reading frame 143            | 5               |
| proline rich 4 (lacrimal)                      | 29              |
| poly (ADP-ribose) polymerase family, member 11 | 75              |
| signal sequence receptor, delta                | 6838            |
| vacuolar protein sorting 13 homolog B (yeast)  | 262             |
| phosphatidylinositol-specific phospholipase C, | 81              |
| phosphotriesterase related                     | 217             |
| decapping mRNA 1B                              | 715             |
| SRY (sex determining region Y)-box 4           | 2736            |
| tyrosine 3-monooxygenase/tryptophan 5-monooxyg | 473             |
| tropomyosin 4                                  | 332             |
| myeloproliferative leukemia virus oncogene     | 0               |
| dimethylarginine dimethylaminohydrolase 1      | 46              |
| heme binding protein 1                         | 2855            |
| transmembrane protein 14E                      | 5               |
| RUN and SH3 domain containing 1                | 909             |
| rhotekin 2                                     | 192             |
| paraneoplastic Ma antigen 2                    | 362             |
| protein phosphatase 1, regulatory (inhibitor)  | 17              |
| growth regulation by estrogen in breast cancer | 30              |

|                                                |      |
|------------------------------------------------|------|
| SIX homeobox 2                                 | 75   |
| opioid binding protein/cell adhesion molecule- | 5    |
| sorting nexin family member 27                 | 46   |
| solute carrier family 39, member 9             | 824  |
| chromosome 10 open reading frame 40            | 5    |
| Protein LOC388813                              | 5    |
|                                                | 5    |
| Berardinelli-Seip congenital lipodystrophy 2 ( | 169  |
| PQ loop repeat containing 3                    | 26   |
| sprouty homolog 3 (Drosophila)                 | 5    |
| Sec23 homolog A (S. cerevisiae)                | 413  |
| cyclic nucleotide gated channel alpha 3        | 5    |
| glutaredoxin (thioltransferase)                | 79   |
| selectin L                                     | 5    |
| chromosome 11 open reading frame 87            | 5    |
| discs, large (Drosophila) homolog-associated p | 1064 |
| cystatin A (stefin A)                          | 5    |
| adenylate kinase 4                             | 116  |
| v-rel avian reticuloendotheliosis viral oncoge | 116  |
| tyrosine aminotransferase                      | 5    |
| potassium intermediate/small conductance calci | 5    |
| ubiquilin 2                                    | 70   |
| fibrinogen-like 2                              | 189  |
| sterile alpha motif domain containing 13       | 253  |
| dual specificity phosphatase 10                | 70   |
| CD4 molecule                                   | 5    |
| protein tyrosine phosphatase type IVA, member  | 5740 |
| mitochondrial ribosomal protein S6             | 3816 |
| NAD(P) dependent steroid dehydrogenase-like    | 5261 |
| doublecortin                                   | 5    |
| neuroblastoma 1, DAN family BMP antagonist     | 852  |
| 5-hydroxytryptamine (serotonin) receptor 2C, G | 5    |
| N-acylsphingosine amidohydrolase (non-lysosoma | 5    |
| hydroxy-delta-5-steroid dehydrogenase, 3 beta- | 5    |
| MINOS1-NBL1 readthrough                        | 852  |
| synaptophysin-like 2                           | 69   |
| A kinase (PRKA) anchor protein 5               | 75   |
| small proline-rich protein 1A                  | 5    |
| ring finger protein 125, E3 ubiquitin protein  | 214  |
| G protein-coupled receptor 111                 | 5    |
| insulin-like growth factor binding protein 4   | 4053 |
| one cut homeobox 2                             | 847  |
| heart and neural crest derivatives expressed 1 | 5    |
| Sad1 and UNC84 domain containing 1             | 376  |
| keratin associated protein 3-3                 | 5    |
| mitogen-activated protein kinase kinase kinase | 44   |
| endoplasmic reticulum protein 27               | 5    |
| transmembrane protein 178B                     | 129  |
| Fc fragment of IgA, receptor for               | 5    |
| protein kinase, cAMP-dependent, regulatory, ty | 583  |
| membrane-spanning 4-domains, subfamily A, memb | 5    |
| gamma-aminobutyric acid (GABA) A receptor, bet | 5    |
| hydroxy-delta-5-steroid dehydrogenase, 3 beta- | 5    |
| glutamate receptor, ionotropic, N-methyl D-asp | 5    |

|                                                |      |
|------------------------------------------------|------|
| protein phosphatase 1, regulatory subunit 12B  | 18   |
| uncoupling protein 2 (mitochondrial, proton ca | 32   |
| BTB (POZ) domain containing 19                 | 61   |
| tRNA aspartic acid methyltransferase 1         | 248  |
| trichohyalin-like 1                            | 5    |
| eukaryotic translation initiation factor 4H    | 5    |
| sulfotransferase family, cytosolic, 1C, member | 97   |
| brain and acute leukemia, cytoplasmic          | 137  |
| neurensin 1                                    | 5    |
| KIAA1737                                       | 57   |
| oleoyl-ACP hydrolase                           | 5    |
| interleukin 2 receptor, gamma                  | 10   |
| basic leucine zipper transcription factor, ATF | 212  |
| tripartite motif containing 58                 | 68   |
| GRB2-binding adaptor protein, transmembrane    | 5    |
| small integral membrane protein 11             | 108  |
| tetra-peptide repeat homeobox 1                | 5    |
| diacylglycerol kinase, eta                     | 46   |
| neuronal differentiation 4                     | 5    |
| kinase suppressor of ras 2                     | 22   |
| R-spondin 4                                    | 5    |
| zinc finger, matrin-type 1                     | 5    |
| heat shock 105kDa/110kDa protein 1             | 4109 |
| transmembrane and ubiquitin-like domain contai | 1043 |
| clathrin, light chain A                        | 167  |
| ubiquitin-conjugating enzyme E2G 2             | 681  |
| WW domain containing adaptor with coiled-coil  | 322  |
| CD1a molecule                                  | 5    |
| transferrin receptor                           | 296  |
| CD3d molecule, delta (CD3-TCR complex)         | 8    |
| PHD finger protein 6                           | 630  |
| zinc finger protein 391                        | 63   |
| basigin                                        | 6876 |
| CDNA FLJ26875 fis, clone PRS08969; Uncharacter | 22   |
| cell division cycle 16                         | 279  |
| trafficking protein particle complex 3-like    | 5    |
| Uncharacterized protein                        | 5    |
| apolipoprotein L, 6                            | 5    |
| chromosome 6 open reading frame 164            | 5    |
| neuroblastoma breakpoint family, member 8      | 5    |
| pyruvate dehydrogenase kinase, isozyme 3       | 659  |
| ring finger protein 150                        | 518  |
| nuclear cap binding protein subunit 2, 20kDa   | 4301 |
| sprouty homolog 1, antagonist of FGF signaling | 150  |
| zinc finger protein 25                         | 11   |
| BTG family, member 2                           | 758  |
| transketolase-like 1                           | 6    |
| peroxisomal, testis specific 1                 | 5    |
| integrin, alpha V                              | 2407 |
| chromosome 11 open reading frame 82            | 579  |
| forkhead box F1                                | 836  |
| Uncharacterized protein                        | 5    |
| zinc finger and BTB domain containing 37       | 213  |
| StAR-related lipid transfer (START) domain con | 767  |

|                                                |       |
|------------------------------------------------|-------|
| MMS22-like, DNA repair protein                 | 102   |
| GS homeobox 1                                  | 5     |
| estrogen-related receptor gamma                | 5     |
| zinc finger protein 280D                       | 173   |
| SGT1, suppressor of G2 allele of SKP1 (S. cere | 430   |
| TSPY-like 4                                    | 5     |
| coronin, actin binding protein, 2B             | 751   |
| interleukin 26                                 | 5     |
| glutamate-cysteine ligase, modifier subunit    | 809   |
| integrin, beta-like 1 (with EGF-like repeat do | 106   |
| meiosis/spermiogenesis associated 1            | 16    |
| palmitoyl-protein thioesterase 1               | 1961  |
| serpin peptidase inhibitor, clade B (ovalbumin | 285   |
| family with sequence similarity 195, member B  | 164   |
| heparan sulfate 6-O-sulfotransferase 3         | 598   |
| CDNA FLJ27256 fis, clone SYN09689; Uncharacter | 24    |
| E2F transcription factor 7                     | 308   |
| poly (ADP-ribose) polymerase 2                 | 2959  |
| keratin associated protein 9-6                 | 5     |
| zinc finger protein 33A                        | 39    |
| kelch repeat and BTB (POZ) domain containing 4 | 7     |
| paralemmin 2                                   | 35    |
| transmembrane (C-terminal) protease, serine 12 | 5     |
| archain 1                                      | 1139  |
| ring finger protein 181                        | 329   |
| kynurenine 3-monooxygenase (kynurenine 3-hydro | 5     |
| ubinuclein 2                                   | 238   |
| leupaxin                                       | 1533  |
| ZFP3 zinc finger protein                       | 29    |
| FYVE, RhoGEF and PH domain containing 6        | 21    |
| estrogen receptor binding site associated, ant | 238   |
| aminomethyltransferase                         | 63    |
| beaded filament structural protein 2, phakinin | 8     |
| inter-alpha-trypsin inhibitor heavy chain fami | 5     |
| nuclear factor, erythroid 2                    | 11    |
| villin 1                                       | 390   |
| TAF6 RNA polymerase II, TATA box binding prote | 8012  |
| BCL2-associated athanogene 6                   | 1221  |
| solute carrier family 22, member 15            | 25    |
| bestrophin 2                                   | 5     |
| carbonic anhydrase X                           | 5     |
| apolipoprotein L domain containing 1           | 27    |
| arrestin domain containing 4                   | 10    |
| solute carrier family 4, sodium bicarbonate co | 17    |
| transmembrane protein 33                       | 1470  |
| Down syndrome critical region gene 3           | 494   |
| lysine (K)-specific demethylase 5A             | 118   |
| Ras suppressor protein 1                       | 10596 |
| Clq and tumor necrosis factor related protein  | 5     |
| zinc finger, BED-type containing 3             | 399   |
|                                                | 5     |
| coiled-coil domain containing 60               | 5     |
| elongator acetyltransferase complex subunit 4  | 282   |
| Transcription factor SOX-7; Uncharacterized pr | 47    |

|                                                |       |
|------------------------------------------------|-------|
| CDC42 effector protein (Rho GTPase binding) 2  | 449   |
| late endosomal/lysosomal adaptor, MAPK and MTO | 1317  |
| cytochrome b5 reductase 4                      | 329   |
| optic atrophy 3 (autosomal recessive, with cho | 137   |
| transmembrane protein 138                      | 1694  |
| rotatin                                        | 288   |
|                                                | 5     |
| proline rich 15-like                           | 159   |
| protein phosphatase 1, regulatory subunit 8    | 1066  |
| APEX nuclease (multifunctional DNA repair enzy | 15798 |
| TELO2 interacting protein 2                    | 188   |
| T-cell acute lymphocytic leukemia 2            | 21    |
| Rac/Cdc42 guanine nucleotide exchange factor ( | 15    |
| zinc finger protein 660                        | 5     |
| integrin, alpha E (antigen CD103, human mucosa | 683   |
| sterol carrier protein 2                       | 3640  |
| inturned planar cell polarity protein          | 105   |
| LMBR1 domain containing 2                      | 211   |
| centrosomal protein 250kDa                     | 25    |
| sorting nexin 6                                | 254   |
| small integral membrane protein 3              | 3180  |
| paternally expressed 10                        | 8778  |
| zinc finger protein 236                        | 60    |
| myelin oligodendrocyte glycoprotein            | 5     |
| protein phosphatase 4, catalytic subunit       | 59    |
| chloride intracellular channel 6               | 16    |
| sialic acid acetyesterase                      | 22    |
| late cornified envelope 1D                     | 5     |
| fibroblast growth factor 12                    | 150   |
| vesicle-associated membrane protein 2 (synapto | 1840  |
| leucine rich repeat containing 16A             | 718   |
| ribosomal RNA adenine dimethylase domain conta | 367   |
| small integral membrane protein 19             | 265   |
| branched chain amino-acid transaminase 1, cyto | 1346  |
| guanine nucleotide binding protein (G protein) | 199   |
| B-cell CLL/lymphoma 11B (zinc finger protein)  | 73    |
| docking protein 6                              | 8     |
| pleckstrin homology-like domain, family A, mem | 82    |
| chromosome 8 open reading frame 48             | 22    |
| glutathione S-transferase mu 5                 | 5     |
|                                                | 12    |
| transmembrane channel-like 2                   | 5     |
| CD160 molecule                                 | 5     |
| polypyrimidine tract binding protein 1         | 7007  |
| solute carrier family 10, member 7             | 77    |
| Zic family member 4                            | 5     |
| osteoclast stimulatory transmembrane protein   | 5     |
| karyopherin alpha 4 (importin alpha 3)         | 111   |
| kelch-like family member 17                    | 46    |
| chromosome 15 open reading frame 41            | 48    |
| Homo sapiens glycosyltransferase 54 domain-con | 5     |
| syntrophin, beta 2 (dystrophin-associated prot | 254   |
| spastic paraplegia 21 (autosomal recessive, Ma | 227   |
| glial cells missing homolog 1 (Drosophila)     | 5     |

|                                                |      |
|------------------------------------------------|------|
| glycophorin A (MNS blood group)                | 5    |
| midnolin                                       | 621  |
| peroxisomal biogenesis factor 2                | 662  |
| regulator of G-protein signaling 20            | 77   |
| transporter 2, ATP-binding cassette, sub-famil | 466  |
| tocopherol (alpha) transfer protein-like       | 265  |
| pim-1 oncogene                                 | 2041 |
| cardiotrophin 1                                | 25   |
| RAB27B, member RAS oncogene family             | 5    |
| clock circadian regulator                      | 86   |
| zinc finger protein 627                        | 105  |
| family with sequence similarity 3, member C    | 15   |
| cell division cycle 14A                        | 123  |
| Sell repeat containing 1                       | 321  |
| zinc finger protein 345                        | 24   |
| MOB kinase activator 3B                        | 52   |
| zinc finger protein 30                         | 99   |
| zinc finger protein 772                        | 22   |
| Rho guanine nucleotide exchange factor (GEF) 2 | 156  |
| ADP-ribosylation factor-like 8B                | 664  |
| v-akt murine thymoma viral oncogene homolog 3  | 168  |
| cyclin K                                       | 1777 |
| Mdm4 p53 binding protein homolog (mouse)       | 443  |
| zinc finger protein 440                        | 12   |
| zinc finger protein 154                        | 5    |
| transmembrane channel-like 3                   | 5    |
| corneodesmosin                                 | 5    |
| tripartite motif containing 67                 | 41   |
|                                                | 5    |
| additional sex combs like 3 (Drosophila)       | 65   |
| fibroblast growth factor 16                    | 5    |
| p21 protein (Cdc42/Rac)-activated kinase 3     | 8    |
| WNK lysine deficient protein kinase 3          | 55   |
| adenosine deaminase                            | 116  |
| discs, large homolog 1 (Drosophila)            | 813  |
| retinol dehydrogenase 11 (all-trans/9-cis/11-c | 1177 |
| DEAH (Asp-Glu-Ala-His) box polypeptide 16      | 879  |
| Uncharacterized protein                        | 5    |
| myeloid-associated differentiation marker      | 3436 |
| Uncharacterized protein                        | 937  |
| cerebellin 3 precursor                         | 30   |
| RAB2B, member RAS oncogene family              | 171  |
| family with sequence similarity 222, member B  | 100  |
| UDP-Gal:betaGlcNAc beta 1,3-galactosyltransfer | 5    |
| T-cell acute lymphocytic leukemia 1            | 5    |
| olfactory receptor, family 52, subfamily B, me | 5    |
| family with sequence similarity 73, member B   | 651  |
| calcium/calmodulin-dependent protein kinase I  | 3500 |
| elastin microfibril interfacer 3               | 12   |
| zinc finger protein 444                        | 1792 |
| PHD finger protein 2                           | 151  |
| cystatin B (stefin B)                          | 203  |
| chemokine (C-X-C motif) ligand 12              | 719  |
| growth hormone receptor                        | 102  |

|                                                          |      |
|----------------------------------------------------------|------|
| CDNA FLJ20147 fis, clone COL07954; HCG1781466;           | 253  |
| integrin, alpha 2 (CD49B, alpha 2 subunit of V           | 50   |
| ATPase, Ca <sup>++</sup> transporting, plasma membrane 1 | 699  |
| beta-gamma crystallin domain containing 3                | 46   |
| zinc finger with KRAB and SCAN domains 8                 | 281  |
| high mobility group 20A                                  | 391  |
| follistatin-like 1                                       | 6788 |
| serine-rich single-pass membrane protein 1               | 5    |
| oxoglutarate (alpha-ketoglutarate) receptor 1            | 7    |
| cullin-associated and neddylation-dissociated            | 1568 |
| chorionic somatomammotropin hormone 2                    | 5    |
| potassium channel tetramerization domain conta           | 693  |
| mucin 3A, cell surface associated                        | 20   |
| histone cluster 1, H2bf                                  | 16   |
| dynactin 3 (p22)                                         | 1816 |
| caspase recruitment domain family, member 16             | 18   |
| chromosome 15 open reading frame 26                      | 5    |
| transmembrane emp24 domain trafficking protein           | 3025 |
| chromosome 5 open reading frame 64                       | 5    |
| late cornified envelope 1B                               | 5    |
| C2 calcium-dependent domain containing 3                 | 605  |
| peptidase inhibitor 3, skin-derived                      | 26   |
| profilin 2                                               | 2184 |
| NADH dehydrogenase (ubiquinone) 1 alpha subcom           | 28   |
| serine/threonine kinase 24                               | 486  |
| lymphocyte antigen 9                                     | 5    |
| chromosome 20 open reading frame 141                     | 5    |
| fragile histidine triad                                  | 141  |
| zinc finger, CCHC domain containing 17                   | 100  |
| tektin 1                                                 | 5    |
| N-acylsphingosine amidohydrolase (non-lysosoma           | 5    |
| hydroxyprostaglandin dehydrogenase 15-(NAD)              | 140  |
| KIAA1549                                                 | 508  |
| sulfotransferase family, cytosolic, 1B, member           | 5    |
| fructosamine 3 kinase related protein                    | 486  |
| regulator of G-protein signaling 7                       | 8    |
| abhydrolase domain containing 10                         | 929  |
| angiopoietin-like 7                                      | 5    |
| chromosome 20 open reading frame 85                      | 5    |
| lysozyme-like 2                                          | 5    |
| pepsinogen 4, group I (pepsinogen A)                     | 5    |
| BRCA1 associated RING domain 1                           | 162  |
| stathmin-like 4                                          | 5    |
| interferon-induced protein with tetratricopept           | 9    |
| sentan, cilia apical structure protein                   | 5    |
| transmembrane protein 254                                | 61   |
| interferon regulatory factor 2 binding protein           | 30   |
| RAD50 interactor 1                                       | 26   |
| prostate and testis expressed 3                          | 5    |
| lysozyme-like 1                                          | 5    |
| family with sequence similarity 13, member B             | 220  |
| CWC27 spliceosome-associated protein homolog (           | 94   |
| smoothed, frizzled family receptor                       | 142  |
| transmembrane protein 155                                | 5    |



|                                                |      |
|------------------------------------------------|------|
| pepsinogen 3, group I (pepsinogen A)           | 5    |
| uroplakin 2                                    | 5    |
| DnaJ (Hsp40) homolog, subfamily C, member 19   | 223  |
| signal transducer and activator of transcripti | 326  |
| oxidoreductase-like domain containing 1        | 1608 |
| tripartite motif containing 22                 | 163  |
| testis-specific serine kinase 6                | 5    |
| solute carrier family 44, member 3             | 13   |
| praja ring finger 2, E3 ubiquitin protein liga | 220  |
| ER degradation enhancer, mannosidase alpha-lik | 948  |
| TSPY-like 1                                    | 2195 |
| G patch domain containing 2-like               | 96   |
| coiled-coil domain containing 112              | 370  |
| LIM and senescent cell antigen-like domains 1  | 68   |
| keratin associated protein 9-7                 | 5    |
| chromosome 2 open reading frame 76             | 11   |
| zinc finger protein 704                        | 124  |
| regulator of G-protein signaling 5             | 56   |
| keratin 37                                     | 5    |
| SSU72 RNA polymerase II CTD phosphatase homolo | 262  |
| ARP3 actin-related protein 3 homolog B (yeast) | 660  |
| acyl-CoA synthetase medium-chain family member | 5    |
| solute carrier family 7 (amino acid transporte | 15   |
| histone cluster 2, H2be                        | 256  |
| V-set and immunoglobulin domain containing 1   | 5    |
| ArfGAP with SH3 domain, ankyrin repeat and PH  | 196  |
| keratin 78                                     | 5    |
| hydroxycarboxylic acid receptor 1              | 38   |
| RING1 and YY1 binding protein                  | 342  |
| mitotic spindle organizing protein 2B          | 44   |
| MICAL C-terminal like                          | 62   |
| prefoldin subunit 4                            | 4331 |
| signal-regulatory protein gamma                | 5    |
| claudin 9                                      | 5    |
| trans-golgi network vesicle protein 23 homolog | 5    |
| acireductone dioxygenase 1                     | 5881 |
| arrestin, beta 2                               | 158  |
| aldehyde dehydrogenase 1 family, member A2     | 401  |
| translocation associated membrane protein 2    | 2774 |
| SPRY domain containing 4                       | 1999 |
| interleukin 17A                                | 5    |
| PDZ domain containing ring finger 4            | 5    |
| protein prenyltransferase alpha subunit repeat | 161  |
| isoleucyl-tRNA synthetase                      | 65   |
| TMEM56-RWDD3 protein                           | 49   |
| S100 calcium binding protein A7A               | 5    |
| nuclear assembly factor 1 ribonucleoprotein    | 1208 |
| caseinolytic mitochondrial matrix peptidase ch | 251  |
| late cornified envelope 1E                     | 5    |
| ligand dependent nuclear receptor corepressor- | 194  |
| solute carrier family 39, member 11            | 544  |
| kelch domain containing 10                     | 347  |
| neurotrophic tyrosine kinase, receptor, type 2 | 48   |
| chromosome 3 open reading frame 55             | 7    |

|                                                |      |
|------------------------------------------------|------|
| testis expressed 30                            | 231  |
| HMG box domain containing 4                    | 966  |
| retinol binding protein 5, cellular            | 256  |
| olfactory receptor, family 51, subfamily E, me | 5    |
| forkhead box P1                                | 264  |
| solute carrier family 16 (monocarboxylate tran | 26   |
| hypoxia inducible factor 3, alpha subunit      | 5    |
| fatty acid amide hydrolase 2                   | 65   |
| WD repeat domain 26                            | 1229 |
| chromosome 9 open reading frame 142            | 1840 |
| Uncharacterized protein                        | 5    |
| late cornified envelope 4A                     | 5    |
| transmembrane protein 59-like                  | 33   |
| zinc finger, DHHC-type containing 23           | 10   |
| cholecystokinin A receptor                     | 5    |
| galactokinase 2                                | 626  |
| family with sequence similarity 71, member F1  | 5    |
| myelin protein zero-like 1                     | 3146 |
| Ral GTPase activating protein, beta subunit (n | 1120 |
| plasmalemma vesicle associated protein         | 5    |
| defensin, beta 110 locus                       | 5    |
| COX assembly mitochondrial protein 2 homolog ( | 87   |
| Rap guanine nucleotide exchange factor (GEF) 1 | 335  |
| RCAN family member 3                           | 395  |
| ADAM metallopeptidase domain 32                | 5    |
| lymphocyte antigen 6 complex, locus D          | 5    |
| transmembrane protein 260                      | 44   |
| wingless-type MMTV integration site family, me | 13   |
| retinol binding protein 3, interstitial        | 5    |
| phosphodiesterase 3B, cGMP-inhibited           | 258  |
| ribosomal modification protein rimK-like famil | 164  |
| coiled-coil domain containing 66               | 38   |
| chemokine (C-X-C motif) ligand 17              | 8    |
| solute carrier family 26 (anion exchanger), me | 5    |
| interferon regulatory factor 6                 | 28   |
| akirin 1                                       | 798  |
| transportin 1                                  | 2041 |
| proline-rich coiled-coil 2B                    | 97   |
| microfibrillar-associated protein 3-like       | 69   |
| carboxypeptidase N, polypeptide 2              | 8    |
| receptor accessory protein 1                   | 49   |
| inosine triphosphatase (nucleoside triphosphat | 187  |
| thymic stromal lymphopoietin                   | 62   |
| sidekick cell adhesion molecule 1              | 60   |
| tripartite motif containing 4                  | 694  |
| glycolipid transfer protein                    | 5    |
| glutathione S-transferase mu 4                 | 767  |
| cyclin H                                       | 250  |
| coiled-coil domain containing 149              | 187  |
| serine/threonine kinase 35                     | 263  |
| serpin peptidase inhibitor, clade B (ovalbumin | 5    |
| small muscle protein, X-linked                 | 19   |
| microphthalmia-associated transcription factor | 593  |
| prostaglandin E synthase 3 (cytosolic)-like    | 139  |

|                                                |       |
|------------------------------------------------|-------|
| aquaporin 2 (collecting duct)                  | 5     |
| adaptor-related protein complex 3, sigma 1 sub | 24    |
| vacuolar protein sorting 26 homolog A (S. pomb | 127   |
| transmembrane protein 194A                     | 43    |
| islet cell autoantigen 1,69kDa-like            | 82    |
| zinc finger protein 654                        | 456   |
| RPA3 antisense RNA 1                           | 22    |
| mannosidase, alpha, class 1A, member 2         | 603   |
| spindle and kinetochore associated complex sub | 414   |
| arginase 2                                     | 6     |
| dynein, light chain, Tctex-type 3              | 27    |
| SRSF protein kinase 1                          | 114   |
| ADP-ribosylation factor interacting protein 1  | 275   |
| mitotic spindle organizing protein 2A          | 25    |
| adaptor-related protein complex 1, sigma 3 sub | 130   |
| mannosidase, beta A, lysosomal-like            | 2819  |
| potassium voltage-gated channel, KQT-like subf | 5     |
| argonaute RISC catalytic component 1           | 402   |
| malectin                                       | 12084 |
| ArfGAP with SH3 domain, ankyrin repeat and PH  | 185   |
| oxysterol binding protein                      | 101   |
| aarF domain containing kinase 1                | 215   |
| forkhead box L2                                | 20    |
| MAP3K7 C-terminal like                         | 87    |
| programmed cell death 1 ligand 2               | 64    |
| MTERF domain containing 2                      | 704   |
| secretory carrier membrane protein 4           | 223   |
| homeobox A10                                   | 1910  |
| PHD finger protein 21B                         | 8     |
| DnaJ (Hsp40) homolog, subfamily C, member 4    | 67    |
| secretagogin, EF-hand calcium binding protein  | 590   |
| fibrinogen alpha chain                         | 1401  |
| RecQ mediated genome instability 2             | 17    |
| UBX domain protein 10                          | 5     |
|                                                | 3180  |
| gamma-aminobutyric acid (GABA) A receptor, alp | 5     |
| olfactory receptor, family 12, subfamily D, me | 5     |
| complement component 5a receptor 2             | 5     |
| chromosome 12 open reading frame 36            | 5     |
| SMAD family member 4                           | 403   |
| heat shock protein, alpha-crystallin-related,  | 121   |
| unc-5 homolog C (C. elegans)                   | 60    |
| keratin associated protein 2-1                 | 5     |
| protocadherin 9                                | 102   |
| syntaxin 16                                    | 756   |
| COMM domain containing 9                       | 1146  |
| chromosome 14 open reading frame 1             | 4423  |
| prolyl 4-hydroxylase, alpha polypeptide II     | 1077  |
| chemokine (C motif) receptor 1                 | 5     |
| tripartite motif containing 52                 | 43    |
| vacuolar protein sorting 52 homolog (S. cerevi | 124   |
| annexin A13                                    | 5     |
| family with sequence similarity 107, member A  | 12    |
| Homo sapiens coiled-coil domain-containing pro | 5     |

|                                                |      |
|------------------------------------------------|------|
| nudix (nucleoside diphosphate linked moiety X) | 17   |
| protein tyrosine phosphatase, receptor type, C | 7    |
| leucine, glutamate and lysine rich 1           | 7    |
| DENN/MADD domain containing 1B                 | 6    |
| carboxypeptidase A4                            | 1319 |
| forkhead box J2                                | 9    |
| sema domain, seven thrombospondin repeats (typ | 98   |
| exonuclease 5                                  | 237  |
| tripartite motif containing 5                  | 435  |
| WAP four-disulfide core domain 1               | 196  |
| cyclin-dependent kinase 17                     | 475  |
| aquaporin 4                                    | 10   |
| nucleotide-binding oligomerization domain cont | 8    |
| 5-hydroxytryptamine (serotonin) receptor 3E, i | 5    |
| dermatopontin                                  | 5    |
| SH3 domain containing 19                       | 245  |
| proline synthetase co-transcribed homolog (bac | 414  |
| UDP-glucose ceramide glucosyltransferase       | 1200 |
| pleckstrin homology domain containing, family  | 5    |
| ankyrin repeat and SOCS box containing 11      | 5    |
| claudin 8                                      | 5    |
| chromosome 6 open reading frame 136            | 307  |
| IKAROS family zinc finger 5 (Pegasus)          | 83   |
| DIRAS family, GTP-binding RAS-like 2           | 5    |
| peroxisomal biogenesis factor 11 beta          | 766  |
| 6-phosphofructo-2-kinase/fructose-2,6-biphosph | 83   |
| INTS3 and NABP interacting protein             | 423  |
| disrupted in schizophrenia 1                   | 132  |
| GATA binding protein 3                         | 136  |
| insulin-like growth factor 2 mRNA binding prot | 460  |
| nicastrin                                      | 578  |
| taste receptor, type 2, member 5               | 16   |
| retinoblastoma binding protein 8               | 88   |
| aspartate beta-hydroxylase domain containing 2 | 102  |
| potassium voltage-gated channel, Isk-related f | 5    |
| abl-interactor 1                               | 317  |
| zinc finger, DHHC-type containing 15           | 5    |
| coiled-coil domain containing 115              | 329  |
| E2F transcription factor 3                     | 91   |
| phosphodiesterase 4B, cAMP-specific            | 127  |
| acrosomal vesicle protein 1                    | 5    |
| aryl hydrocarbon receptor nuclear translocator | 283  |
| family with sequence similarity 71, member E1  | 89   |
| Purkinje cell protein 4 like 1                 | 23   |
| RBM14-RBM4 readthrough                         | 151  |
| sperm-tail PG-rich repeat containing 1         | 24   |
| keratin 31                                     | 5    |
| phosphoglycerate kinase 2                      | 5    |
| nuclear factor I/B                             | 1149 |
| protein-L-isoaspartate (D-aspartate) O-methylt | 476  |
| immunoglobulin superfamily, DCC subclass, memb | 12   |
| small integral membrane protein 9              | 5    |
| proteolipid protein 1                          | 5    |
| HGF activator                                  | 15   |

|                                                        |      |
|--------------------------------------------------------|------|
| RNA binding motif protein 4                            | 151  |
| neuro-oncological ventral antigen 2                    | 7    |
| ubiquinol-cytochrome c reductase complex assem         | 500  |
| RAB30, member RAS oncogene family                      | 274  |
| progesterone and adiponectin receptor family member IX | 233  |
| tumor necrosis factor (ligand) superfamily, me         | 30   |
| family with sequence similarity 60, member A           | 58   |
| small proline-rich protein 4                           | 5    |
| S100 calcium binding protein A11                       | 433  |
| GC-rich sequence DNA-binding factor 2                  | 88   |
| solute carrier family 25, member 30                    | 92   |
| spermatogenesis associated 3                           | 5    |
| alcohol dehydrogenase 1A (class I), alpha poly         | 5    |
| transmembrane emp24 protein transport domain c         | 3117 |
| cyclin-dependent kinase 3                              | 109  |
| chromosome 20 open reading frame 26                    | 5    |
| RIC3 acetylcholine receptor chaperone                  | 5    |
| transmembrane 4 L six family member 4                  | 348  |
| inositol 1,4,5-trisphosphate receptor interact         | 893  |
| cancer/testis antigen 62                               | 5    |
| midline 2                                              | 194  |
| ataxin 7-like 1                                        | 67   |
| COMM domain containing 2                               | 833  |
| methylcrotonoyl-CoA carboxylase 2 (beta)               | 1590 |
| killer cell immunoglobulin-like receptor, two          | 5    |
| ubiquitin-conjugating enzyme E2G 1                     | 5620 |
| zinc finger protein 552                                | 9    |
| killer cell immunoglobulin-like receptor, two          | 5    |
| KIAA1671                                               | 549  |
| keratin associated protein 5-2                         | 5    |
| HERV-H LTR-associating 3                               | 5    |
| family with sequence similarity 13, member C           | 343  |
| serpin peptidase inhibitor, clade I (panc1),           | 5    |
| casein kappa                                           | 5    |
| synapsin III                                           | 5    |
| DnaJ (Hsp40) homolog, subfamily C, member 27           | 41   |
| CAP-GLY domain containing linker protein famil         | 490  |
| kinesin heavy chain member 2A                          | 905  |
| coiled-coil-helix-coiled-coil-helix domain con         | 8    |
| oligodendrocyte lineage transcription factor 2         | 15   |
| TMPRSS11B N-terminal like                              | 5    |
| solute carrier family 22 (organic cation/carni         | 0    |
| keratin associated protein 9-9                         | 5    |
| thioredoxin-related transmembrane protein 2            | 1344 |
| polymerase (RNA) III (DNA directed) polypeptid         | 216  |
| protein phosphatase 1, regulatory subunit 3C           | 416  |
| ring finger protein 165                                | 18   |
| intraflagellar transport 46 homolog (Chlamydom         | 214  |
| homeobox A1                                            | 157  |
| NAD(P)H dehydrogenase, quinone 1                       | 4421 |
| dermatan sulfate epimerase-like                        | 26   |
| H2B histone family, member M                           | 5    |
| E2F-associated phosphoprotein                          | 2883 |
| enamelin                                               | 5    |

|                                                |       |
|------------------------------------------------|-------|
| distal-less homeobox 6                         | 76    |
| antioxidant 1 copper chaperone                 | 43    |
| cytochrome b561 family, member D1              | 105   |
| signal recognition particle 54kDa              | 1789  |
| insulinoma-associated 2                        | 5     |
| G protein-coupled receptor 39                  | 151   |
| sepiapterin reductase (7,8-dihydrobiopterin:NA | 554   |
| diencephalon/mesencephalon homeobox 1          | 31    |
| NudC domain containing 2                       | 308   |
| HECT and RLD domain containing E3 ubiquitin pr | 18    |
| vestigial like 3 (Drosophila)                  | 187   |
| PBX/knotted 1 homeobox 2                       | 46    |
| Fc receptor-like 1                             | 5     |
| sulfotransferase family, cytosolic, 1C, member | 16    |
| triple QxxK/R motif containing                 | 210   |
| F-box protein 3                                | 813   |
| purine nucleoside phosphorylase                | 50    |
| arginine and glutamate rich 1                  | 9450  |
| KIAA1147                                       | 73    |
| B-cell acute lymphoblastic leukemia expressed  | 5     |
| v-myc avian myelocytomatosis viral oncogene ho | 22906 |
| coiled-coil domain containing 39               | 5     |
| NAD kinase                                     | 173   |
| cytochrome P450, family 4, subfamily F, polype | 121   |
| ATP-binding cassette, sub-family B (MDR/TAP),  | 5     |
| methylmalonyl CoA epimerase                    | 34    |
| histone cluster 1, H2bk                        | 57    |
| major intrinsic protein of lens fiber          | 5     |
| ADP-ribosylarginine hydrolase                  | 5     |
| inositol hexakisphosphate kinase 3             | 8     |
| ADP-ribosylation factor GTPase activating prot | 6000  |
| solute carrier organic anion transporter famil | 1614  |
| SprT-like N-terminal domain                    | 1128  |
| FK506 binding protein 8, 38kDa                 | 118   |
| exostosin-like glycosyltransferase 2           | 204   |
| solute carrier family 25, member 46            | 391   |
| SPRY domain containing 3                       | 353   |
| chromosome 14 open reading frame 2             | 1228  |
| synaptotagmin XV                               | 5     |
| echinoderm microtubule associated protein like | 62    |
| Uncharacterized protein                        | 5     |
| RNA binding motif protein 22                   | 4854  |
| nuclear GTPase, germinal center associated     | 10    |
| cytochrome P450, family 2, subfamily B, polype | 5     |
| RAR-related orphan receptor A                  | 102   |
| TM2 domain containing 2                        | 1085  |
| lin-7 homolog C (C. elegans)                   | 1701  |
| voltage-dependent anion channel 1              | 106   |
| ring finger protein 121                        | 610   |
| toll-interleukin 1 receptor (TIR) domain conta | 82    |
| G protein-coupled receptor 27                  | 781   |
| placenta-specific 9                            | 7     |
| loricrin                                       | 5     |
| inositol-trisphosphate 3-kinase B              | 5     |

|                                                |      |
|------------------------------------------------|------|
| protein tyrosine phosphatase, receptor type, H | 21   |
| ankyrin repeat domain 65                       | 5    |
| arylacetamide deacetylase                      | 5    |
| RNA binding motif protein, X-linked-like 2     | 5    |
| SH2B adaptor protein 3                         | 89   |
| family with sequence similarity 76, member A   | 173  |
| family with sequence similarity 89, member A   | 368  |
| ATP-binding cassette, sub-family D (ALD), memb | 53   |
| ring finger and CHY zinc finger domain contain | 821  |
| interleukin 2 receptor, alpha                  | 5    |
| par-6 family cell polarity regulator beta      | 277  |
| GPRIN family member 3                          | 213  |
| remodeling and spacing factor 1                | 216  |
| membrane metallo-endopeptidase                 | 37   |
| RAB GTPase activating protein 1-like           | 364  |
| homeobox B5                                    | 55   |
| family with sequence similarity 187, member A  | 31   |
| muscleblind-like splicing regulator 1          | 135  |
| gamma-aminobutyric acid (GABA) A receptor, gam | 5    |
| gap junction protein, beta 1, 32kDa            | 96   |
| HSPA (heat shock 70kDa) binding protein, cytop | 368  |
| ER lipid raft associated 1                     | 86   |
| solute carrier family 39 (zinc transporter), m | 2413 |
| sortilin-related VPS10 domain containing recep | 88   |
| plexin A2                                      | 8    |
| paired box 7                                   | 7    |
| OTU domain containing 6A                       | 5    |
| C-type lectin domain family 6, member A        | 5    |
| retinoblastoma binding protein 4               | 486  |
| zinc finger protein 561                        | 156  |
| von Hippel-Lindau tumor suppressor, E3 ubiquit | 2386 |
| SEC22 vesicle trafficking protein homolog A (S | 294  |
| T-cell leukemia/lymphoma 1B                    | 5    |
| aquaporin 8                                    | 7    |
| ELAV like neuron-specific RNA binding protein  | 5    |
| peptidylprolyl isomerase A (cyclophilin A)-lik | 5    |
| mitochondrial ribosomal protein L13            | 1730 |
| cytochrome c oxidase assembly homolog 10 (yeas | 72   |
| peptidylprolyl isomerase A (cyclophilin A)-lik | 5    |
| olfactory receptor, family 52, subfamily L, me | 5    |
| protein kinase, DNA-activated, catalytic polyp | 707  |
| chemokine (C-C motif) ligand 22                | 5    |
| eukaryotic elongation factor-2 kinase          | 115  |
| transmembrane protein 218                      | 553  |
| peptidylprolyl isomerase A (cyclophilin A)-lik | 5    |
| peptidylprolyl isomerase A (cyclophilin A)-lik | 5    |
| peptidylprolyl isomerase A (cyclophilin A)-lik | 5    |
| calcium channel, voltage-dependent, gamma subu | 5    |
| long intergenic non-protein coding RNA 923     | 5    |
| sperm associated antigen 6                     | 23   |
| hippocampus abundant transcript-like 2         | 111  |
| phosphoribosyl pyrophosphate synthetase 1      | 2966 |
| TBC1 domain family, member 5                   | 400  |
| HOP homeobox                                   | 55   |

|                                                |      |
|------------------------------------------------|------|
| ubiquitin-conjugating enzyme E2B               | 3421 |
| acetyl-CoA acyltransferase 2                   | 189  |
| SLIT and NTRK-like family, member 5            | 429  |
| Myb/SANT-like DNA-binding domain containing 4  | 304  |
| calpain 9                                      | 5    |
| interleukin 6 (interferon, beta 2)             | 472  |
| interleukin-1 receptor-associated kinase 3     | 13   |
| tyrosine 3-monooxygenase/tryptophan 5-monooxyg | 7321 |
| enhancer of rudimentary homolog (Drosophila)   | 843  |
| alcohol dehydrogenase 6 (class V)              | 17   |
| transmembrane protein 154                      | 5    |
| dopamine receptor D4                           | 20   |
| PAN2 poly(A) specific ribonuclease subunit hom | 310  |
| olfactory receptor, family 10, subfamily AD, m | 5    |
| complement component 9                         | 5    |
| secretory carrier membrane protein 5           | 127  |
| THO complex 3                                  | 29   |
| EWS RNA-binding protein 1                      | 8833 |
| zinc finger protein 259                        | 265  |
| Esophagus cancer-related gene-2 interaction su | 30   |
| Uncharacterized protein                        | 5    |
| transcription factor AP-2 gamma (activating en | 22   |
| TNF receptor-associated factor 3               | 833  |
| solute carrier family 6 (neurotransmitter tran | 83   |
| carbohydrate (N-acetylgalactosamine 4-0) sulfo | 20   |
| WAP four-disulfide core domain 9               | 5    |
| HIRA interacting protein 3                     | 4526 |
| CD68 molecule                                  | 267  |
| transmembrane protein 167B                     | 42   |
| dual specificity phosphatase 9                 | 3766 |
| secreted protein, acidic, cysteine-rich (osteo | 2467 |
| zinc finger protein 460                        | 164  |
| ring finger protein 139                        | 237  |
| bone morphogenetic protein 8b                  | 88   |
| zinc finger, CCHC domain containing 8          | 297  |
| PR domain containing 7                         | 5    |
| myeloid leukemia factor 2                      | 623  |
| regulator of microtubule dynamics 2            | 7    |
| chemokine (C-X-C motif) ligand 9               | 5    |
| basic helix-loop-helix family, member e40      | 1571 |
| chromosome 9 open reading frame 85             | 57   |
| cat eye syndrome chromosome region, candidate  | 5    |
| suppressor APC domain containing 1             | 12   |
| Fc fragment of IgG, low affinity IIIa, recepto | 5    |
| chloride intracellular channel 4               | 226  |
| protein kinase, cAMP-dependent, regulatory, ty | 1257 |
| PR domain containing 1, with ZNF domain        | 48   |
| chromosome 2 open reading frame 49             | 161  |
| transient receptor potential cation channel, s | 242  |
| granulysin                                     | 5    |
| THAP domain containing, apoptosis associated p | 109  |
| CD101 molecule                                 | 5    |
| NDRG family member 3                           | 960  |
| clavesin 2                                     | 19   |



|                                                |       |
|------------------------------------------------|-------|
| LY6/PLAUR domain containing 6                  | 261   |
| CDC42 small effector 2                         | 1057  |
| cystatin S                                     | 5     |
| mbt domain containing 1                        | 113   |
| chromosome 10 open reading frame 82            | 5     |
| chromosome 12 open reading frame 68            | 5     |
| v-erb-b2 avian erythroblastic leukemia viral o | 27    |
| DDB1- and CUL4-associated factor 8             | 1924  |
| GABA(A) receptor-associated protein            | 10137 |
| cytidine deaminase                             | 302   |
| zinc finger protein 423                        | 170   |
| cyclin-dependent kinase 15                     | 7     |
| protein phosphatase 1, regulatory (inhibitor)  | 8     |
| NME1-NME2 readthrough                          | 191   |
| T-box 3                                        | 71    |
| cyclin T2                                      | 381   |
| F-box protein 47                               | 5     |
| chromosome 11 open reading frame 72            | 5     |
| megalencephalic leukoencephalopathy with subco | 5     |
| ST8 alpha-N-acetyl-neuraminide alpha-2,8-sialy | 5     |
| aprataxin and PNKP like factor                 | 57    |
| RAD51 recombinase                              | 838   |
| zinc finger protein 770                        | 52    |
| prostaglandin E synthase                       | 248   |
| Mdml nuclear protein homolog (mouse)           | 146   |
| UDP glycosyltransferase 3 family, polypeptide  | 5     |
| Fas-activated serine/threonine kinase          | 645   |
| GINS complex subunit 1 (Psf1 homolog)          | 56    |
| annexin A5                                     | 9387  |
| ring finger protein 144A                       | 124   |
| calmegin                                       | 288   |
| caspase 14, apoptosis-related cysteine peptida | 5     |
| zinc finger protein 676                        | 5     |
| Selenoprotein M                                | 1505  |
| nuclear receptor subfamily 4, group A, member  | 244   |
| prostate and testis expressed 1                | 5     |
| kelch repeat and BTB (POZ) domain containing 7 | 362   |
| fission 1 (mitochondrial outer membrane) homol | 11997 |
| 2'-deoxynucleoside 5'-phosphate N-hydrolase 1  | 101   |
| dishevelled associated activator of morphogene | 167   |
| keratin associated protein 8-1                 | 5     |
| cystatin D                                     | 5     |
| neurogenin 2                                   | 5     |
| NFKB activating protein                        | 422   |
| phosphoribosyl pyrophosphate synthetase 2      | 739   |
| LSM1 homolog, U6 small nuclear RNA associated  | 920   |
| tropomyosin 1 (alpha)                          | 21798 |
| WAS protein family, member 2                   | 311   |
| homeobox D3                                    | 23    |
| melanoma antigen family E, 2                   | 5     |
| mature T-cell proliferation 1                  | 18    |
| solute carrier family 28 (concentrative nucleo | 14    |
| F-box protein 28                               | 461   |
| PWWP domain containing 2A                      | 272   |

|                                                |       |
|------------------------------------------------|-------|
| kinectin 1 (kinesin receptor)                  | 469   |
| lymphocyte antigen 6 complex, locus G6C        | 5     |
| ZFP69 zinc finger protein B                    | 176   |
| pleckstrin homology domain containing, family  | 529   |
| transmembrane protein 200B                     | 152   |
| von Willebrand factor A domain containing 9    | 4511  |
| zinc finger protein 436                        | 73    |
| phosphoglucomutase 2-like 1                    | 183   |
| HCG2028865; Uncharacterized protein            | 5     |
| ST8 alpha-N-acetyl-neuraminide alpha-2,8-sialy | 9     |
| parvin, alpha                                  | 1912  |
| chromosome 7 open reading frame 41             | 235   |
| arachidonate 15-lipoxygenase                   | 5     |
| cytoplasmic polyadenylation element binding pr | 48    |
| Uncharacterized protein                        | 5     |
| nicolin 1                                      | 244   |
| integral membrane protein 2C                   | 67220 |
| MEF2BNB-MEF2B readthrough                      | 35    |
| cystatin SN                                    | 5     |
| SMAD family member 1                           | 240   |
| endoplasmic reticulum metallopeptidase 1       | 53    |
| Sp8 transcription factor                       | 95    |
| phospholipid scramblase 2                      | 5     |
| chromosome 10 open reading frame 71            | 5     |
| caspase 1, apoptosis-related cysteine peptidas | 5     |
| upstream transcription factor 1                | 5     |
| retinoblastoma binding protein 9               | 102   |
| major facilitator superfamily domain containin | 257   |
| StAR-related lipid transfer (START) domain con | 17    |
| zinc finger protein 264                        | 412   |
| LIM domain containing 2                        | 90    |
| serine/threonine kinase 32A                    | 8     |
| chromosome 14 open reading frame 39            | 5     |
| CDK5 regulatory subunit associated protein 1-1 | 541   |
| septin 6                                       | 1854  |
| nucleolar and spindle associated protein 1     | 686   |
| mirror-image polydactyly 1                     | 45    |
| olfactory receptor, family 9, subfamily Q, mem | 5     |
| ring finger protein 187                        | 13589 |
| KIAA0040                                       | 15    |
| B and T lymphocyte associated                  | 5     |
| peptidylprolyl isomerase A (cyclophilin A)     | 878   |
| methyltransferase like 15                      | 17    |
| coproporphyrinogen oxidase                     | 377   |
| pre-mRNA processing factor 6                   | 689   |
| PTC7 protein phosphatase homolog (S. cerevisia | 817   |
| notch 3                                        | 45    |
| macrophage erythroblast attacher               | 5906  |
| PHD finger protein 14                          | 112   |
| UDP-glucose pyrophosphorylase 2                | 4271  |
| prolactin receptor                             | 95    |
| katanin p80 subunit B-like 1                   | 105   |
| X-prolyl aminopeptidase (aminopeptidase P) 1,  | 38    |
| family with sequence similarity 92, member B   | 5     |

|                                                |      |
|------------------------------------------------|------|
| mannosidase, alpha, class 2A, member 1         | 1521 |
| POU class 2 homeobox 1                         | 83   |
| zinc finger CCCH-type, antiviral 1-like        | 98   |
| cytochrome P450, family 2, subfamily J, polype | 22   |
| Uncharacterized protein                        | 5    |
| glyoxalase domain containing 5                 | 5    |
| adenylate cyclase 1 (brain)                    | 76   |
| ADP-ribosylation factor-like 11                | 5    |
| cysteine-rich hydrophobic domain 1             | 16   |
| HCG1643653; Uncharacterized protein            | 5    |
| stearoyl-CoA desaturase (delta-9-desaturase)   | 9726 |
| long intergenic non-protein coding RNA 346     | 26   |
| abhydrolase domain containing 2                | 210  |
| ISY1-RAB43 readthrough                         | 5    |
| guanine nucleotide binding protein (G protein) | 5    |
| glycine receptor, beta                         | 118  |
| acyl-CoA synthetase long-chain family member 6 | 7    |
| chronic lymphocytic leukemia up-regulated 1    | 5    |
| casein kinase 1, epsilon                       | 3032 |
| solute carrier family 2 (facilitated glucose t | 5    |
| sal-like 3 (Drosophila)                        | 64   |
| motile sperm domain containing 2               | 76   |
| relaxin 1                                      | 5    |
| zinc finger protein 641                        | 87   |
| wingless-type MMTV integration site family, me | 25   |
| solute carrier family 2 (facilitated glucose t | 47   |
| butyrophilin, subfamily 3, member A2           | 5    |
| neugrin, neurite outgrowth associated          | 1754 |
| NIPA-like domain containing 4                  | 17   |
| NK3 homeobox 1                                 | 240  |
| zinc finger protein 235                        | 69   |
| coiled-coil domain containing 126              | 846  |
| neurogranin (protein kinase C substrate, RC3)  | 60   |
| coiled-coil domain containing 121              | 5    |
| SWT1 RNA endoribonuclease homolog (S. cerevisi | 104  |
| leucine-rich repeat, immunoglobulin-like and t | 5    |
| Uncharacterized protein                        | 5    |
| chromogranin A (parathyroid secretory protein  | 7    |
| v-maf avian musculoaponeurotic fibrosarcoma on | 608  |
| aconitase 1, soluble                           | 738  |
| insulin-like growth factor 1 (somatomedin C)   | 19   |
| ribosomal protein L32                          | 2274 |
| phosphodiesterase 6A, cGMP-specific, rod, alph | 5    |
| annexin A7                                     | 1433 |
| transcription factor CP2                       | 1274 |
| melanoma antigen family A, 8                   | 5    |
| myotubularin related protein 11                | 16   |
| secl family domain containing 1                | 41   |
| V-set and immunoglobulin domain containing 10  | 355  |
| centriole, cilia and spindle-associated protei | 1210 |
| interferon, alpha-inducible protein 6          | 141  |
| solute carrier family 3 (amino acid transporte | 1100 |
| NEDD4 binding protein 2-like 1                 | 92   |
| interaction protein for cytohesin exchange fac | 16   |

|                                                                         |      |
|-------------------------------------------------------------------------|------|
| glycine-N-acyltransferase-like 2                                        | 23   |
| MYST/Esal-associated factor 6                                           | 440  |
| ecto-NOX disulfide-thiol exchanger 2                                    | 215  |
| ubiquitin specific peptidase 7 (herpes virus-a                          | 656  |
| ankyrin repeat domain 44                                                | 187  |
| maelstrom spermatogenic transposon silencer                             | 9    |
| diffuse panbronchiolitis critical region 1                              | 5    |
| TNFAIP3 interacting protein 1                                           | 334  |
| chemokine (C-C motif) ligand 1                                          | 6    |
| aprataxin                                                               | 310  |
| replication initiator 1                                                 | 2836 |
| cysteine-serine-rich nuclear protein 2                                  | 104  |
| family with sequence similarity 217, member B                           | 175  |
| ankyrin repeat domain 45                                                | 10   |
| sorting nexin 13                                                        | 100  |
| lysophosphatidylcholine acyltransferase 1                               | 298  |
| fatty acyl CoA reductase 1                                              | 814  |
|                                                                         | 5    |
| signal peptidase complex subunit 2 homolog (S.                          | 28   |
| thioredoxin-related transmembrane protein 4                             | 466  |
| dickkopf WNT signaling pathway inhibitor 2                              | 5    |
| chromosome 4 open reading frame 26                                      | 5    |
| zinc finger, DHHC-type containing 22                                    | 32   |
| lin-28 homolog B (C. elegans)                                           | 118  |
| vacuole membrane protein 1                                              | 2505 |
| chemokine (C-C motif) receptor 3                                        | 5    |
| high mobility group AT-hook 1                                           | 2024 |
| RERG/RAS-like                                                           | 17   |
| ER degradation enhancer, mannosidase alpha-lik                          | 535  |
| keratin associated protein 5-7                                          | 5    |
| ornithine aminotransferase                                              | 5    |
| pleckstrin homology domain containing, family                           | 3303 |
| failed axon connections homolog (Drosophila)                            | 95   |
| zinc finger, RAN-binding domain containing 1                            | 724  |
| sclerostin domain containing 1                                          | 5    |
| ubiquitin-conjugating enzyme E2N                                        | 321  |
| glutathione peroxidase 6 (olfactory)                                    | 5    |
| 2,3-bisphosphoglycerate mutase                                          | 1028 |
| chromosome X open reading frame 48                                      | 5    |
| D-amino-acid oxidase                                                    | 26   |
| protein phosphatase, Mg <sup>2+</sup> /Mn <sup>2+</sup> dependent, 1N ( | 79   |
| calsyntenin 2                                                           | 119  |
| tripartite motif containing 66                                          | 33   |
| collagen, type XV, alpha 1                                              | 371  |
| cyclin M3                                                               | 934  |
| CD84 molecule                                                           | 5    |
| mitogen-activated protein kinase kinase kinase                          | 226  |
| solute carrier family 6 (neurotransmitter tran                          | 5    |
| trafficking protein particle complex 4                                  | 649  |
| C-type lectin domain family 1, member B                                 | 5    |
| mediator complex subunit 17                                             | 197  |
| MYC binding protein                                                     | 85   |
| ELK4, ETS-domain protein (SRF accessory protei                          | 39   |
| TIA1 cytotoxic granule-associated RNA binding                           | 1370 |

|                                                                                        |             |
|----------------------------------------------------------------------------------------|-------------|
| ubiquitin-conjugating enzyme E2R 2                                                     | 2442        |
| cadherin 7, type 2                                                                     | 42          |
| Rho GTPase activating protein 11A                                                      | 410         |
| TSR2, 20S rRNA accumulation, homolog (S. cerev<br>shisa family member 6                | 233<br>5    |
| proline rich 23A                                                                       | 5           |
| eukaryotic translation initiation factor 4E bi<br>chromosome 2 open reading frame 42   | 121<br>13   |
| carbonic anhydrase XIII                                                                | 42          |
| solute carrier family 9, subfamily A (NHE3, ca<br>pecanex-like 4 (Drosophila)          | 2939<br>268 |
| v-myb avian myeloblastosis viral oncogene homo<br>chromosome X open reading frame 24   | 39<br>60    |
| transmembrane protein 38A                                                              | 158         |
| phosphodiesterase 4C, cAMP-specific                                                    | 5           |
| solute carrier family 1 (glutamate/neutral ami<br>striatin, calmodulin binding protein | 380<br>476  |
| leucine rich repeat containing 41                                                      | 1532        |
| RAR-related orphan receptor C                                                          | 42          |
| transmembrane protein 215                                                              | 5           |
| exocyst complex component 6B                                                           | 106         |
| annexin A8                                                                             | 5           |
| annexin A8-like 2                                                                      | 5           |
| R3H domain containing-like                                                             | 5           |
| annexin A8-like 1                                                                      | 5           |
| methyltransferase like 21B                                                             | 51          |
| attractin                                                                              | 39          |
| POM121 transmembrane nucleoporin C                                                     | 5           |
| nephronophthisis 3 (adolescent)                                                        | 44          |
| receptor accessory protein 4                                                           | 78          |
| nudix (nucleoside diphosphate linked moiety X)                                         | 190         |
| upper zone of growth plate and cartilage matri                                         | 5           |
| major histocompatibility complex, class I, A                                           | 276         |
| WW domain binding protein 1-like                                                       | 5           |
| long intergenic non-protein coding RNA 908                                             | 5           |
| forkhead box R2                                                                        | 5           |
| DEXH (Asp-Glu-X-His) box polypeptide 58                                                | 5           |
| heterogeneous nuclear ribonucleoprotein A2/B1                                          | 25319       |
| retinoblastoma binding protein 7                                                       | 270         |
| sprouty homolog 4 (Drosophila)                                                         | 110         |
| KIAA2018                                                                               | 23          |
| RNA-binding region (RNP1, RRM) containing 3                                            | 419         |
| relaxin 2                                                                              | 20          |
| aspartoacylase                                                                         | 5           |
| G protein-coupled receptor 12                                                          | 5           |
| flap structure-specific endonuclease 1                                                 | 31          |
| zinc finger, C4H2 domain containing                                                    | 432         |
| chromosome 12 open reading frame 77                                                    | 5           |
| matrilin 2                                                                             | 371         |
| UDP-GlcNAc:betaGal beta-1,3-N-acetylglucosamin                                         | 5           |
| hephaestin                                                                             | 44          |
| FERM domain containing 6                                                               | 508         |
| interleukin 12 receptor, beta 2                                                        | 5           |
| heterogeneous nuclear ribonucleoprotein A1                                             | 2079        |

|                                                                       |      |
|-----------------------------------------------------------------------|------|
| RAB3D, member RAS oncogene family                                     | 111  |
| Scm-like with four mbt domains 1                                      | 116  |
| cyclin F                                                              | 1432 |
| egl-9 family hypoxia-inducible factor 3                               | 71   |
| vaccinia related kinase 2                                             | 25   |
| mitochondrially encoded NADH dehydrogenase 5                          | 675  |
| nescient helix loop helix 1                                           | 5    |
| nuclear casein kinase and cyclin-dependent kin                        | 1692 |
| glutamine--fructose-6-phosphate transaminase 1                        | 1313 |
| serum/glucocorticoid regulated kinase 1                               | 369  |
| interferon-induced protein 44-like                                    | 11   |
| Uncharacterized protein                                               | 5    |
| B-cell CLL/lymphoma 7A                                                | 96   |
| mitogen-activated protein kinase 1                                    | 630  |
| cytochrome P450, family 7, subfamily B, polype                        | 53   |
| protein phosphatase, Mg <sup>2+</sup> /Mn <sup>2+</sup> dependent, 1E | 178  |
| leukocyte receptor tyrosine kinase                                    | 5    |
| ubiquilin 4                                                           | 5    |
| mohawk homeobox                                                       | 165  |
| melanoma antigen family D, 1                                          | 8092 |
| family with sequence similarity 155, member A                         | 118  |
| v-myc avian myelocytomatosis viral oncogene ne                        | 73   |
| HCG20425, isoform CRA_a; Uncharacterized prote                        | 283  |
| regulator of G-protein signaling 21                                   | 5    |
| methyltransferase like 6                                              | 20   |
| synaptotagmin XI                                                      | 750  |
| IKAROS family zinc finger 4 (Eos)                                     | 329  |
| crystallin, zeta (quinone reductase)-like 1                           | 340  |
| platelet-derived growth factor beta polypeptid                        | 5    |
| interleukin 6 signal transducer (gp130, oncost                        | 213  |
| interferon regulatory factor 2                                        | 420  |
| family with sequence similarity 65, member B                          | 7    |
| chromosome 5 open reading frame 51                                    | 124  |
| PHD finger protein 1                                                  | 19   |
| anaplastic lymphoma receptor tyrosine kinase                          | 5    |
| solute carrier family 15 (oligopeptide transpo                        | 5    |
| activating transcription factor 7 interacting                         | 667  |
| xenotropic and polytropic retrovirus receptor                         | 544  |
| myosin, heavy chain 10, non-muscle                                    | 134  |
| itchy E3 ubiquitin protein ligase                                     | 769  |
| popeye domain containing 2                                            | 7    |
| armadillo repeat containing 8                                         | 398  |
| tumor necrosis factor                                                 | 5    |
| oxysterol binding protein-like 11                                     | 101  |
| protein kinase C, beta                                                | 81   |
| golgi SNAP receptor complex member 2                                  | 1099 |
| CUB domain containing protein 1                                       | 137  |
| hedgehog interacting protein                                          | 65   |
| 3-ketodihydrosphingosine reductase                                    | 322  |
| leukocyte immunoglobulin-like receptor, subfam                        | 5    |
| TBP-like 1                                                            | 69   |
| LanC lantibiotic synthetase component C-like 1                        | 3395 |
| maestro heat-like repeat family member 2A                             | 13   |
| zinc finger protein 608                                               | 22   |

|                                                |       |
|------------------------------------------------|-------|
| claudin 4                                      | 64    |
| kallikrein-related peptidase 5                 | 5     |
| HCG1997999; cDNA FLJ33996 fis, clone DFNES2008 | 44    |
| signal transducer and activator of transcripti | 33    |
| Uncharacterized protein                        | 5     |
| PCI domain containing 2                        | 508   |
| chromosome 7 open reading frame 72             | 5     |
| solute carrier family 32 (GABA vesicular trans | 5     |
| keratin 4                                      | 5     |
| ankyrin repeat domain 17                       | 1334  |
| TatD DNase domain containing 2                 | 894   |
| ADP-ribosylation factor-like 15                | 119   |
| HECT domain containing E3 ubiquitin protein li | 1514  |
|                                                | 5     |
| S100 calcium binding protein A4                | 943   |
| splicing factor 1                              | 17473 |
| TBC1 domain family, member 28                  | 5     |
| ATP-binding cassette, sub-family B (MDR/TAP),  | 5     |
| lens epithelial protein                        | 5     |
| phospholipase D1, phosphatidylcholine-specific | 128   |
| zinc finger and BTB domain containing 8 opposi | 74    |
| ash2 (absent, small, or homeotic)-like (Drosop | 140   |
| HIG1 hypoxia inducible domain family, member 1 | 254   |
| ring finger protein 169                        | 204   |
| trafficking protein particle complex 6B        | 69    |
| N-acylethanolamine acid amidase                | 115   |
| calneuron 1                                    | 5     |
| cortactin binding protein 2                    | 29    |
| male-specific lethal 2 homolog (Drosophila)    | 175   |
| POZ (BTB) and AT hook containing zinc finger 1 | 165   |
| chemokine (C-X3-C motif) receptor 1            | 17    |
| ribonuclease, RNase A family, 13 (non-active)  | 5     |
| nebulette                                      | 181   |
| ankyrin repeat domain 13A                      | 1644  |
| IQ motif containing J                          | 5     |
| fibroblast growth factor 13                    | 17    |
| prepronociceptin                               | 13    |
| host cell factor C1 regulator 1 (XPO1 dependen | 2156  |
| prospero homeobox 1                            | 131   |
| chromosome 10 open reading frame 25            | 29    |
| eukaryotic translation initiation factor 1     | 415   |
| ALX homeobox 4                                 | 52    |
| ets variant 3                                  | 37    |
| UDP-GlcNAc:betaGal beta-1,3-N-acetylglucosamin | 57    |
| coiled-coil domain containing 176              | 61    |
| family with sequence similarity 227, member B  | 44    |
| myozenin 3                                     | 8     |
| excision repair cross-complementing rodent rep | 36    |
| keratin associated protein 5-4                 | 5     |
| zinc finger and BTB domain containing 16       | 73    |
| 5'-nucleotidase domain containing 3            | 235   |
| ribonuclease, RNase A family, 1 (pancreatic)   | 5     |
| polymerase (RNA) III (DNA directed) polypeptid | 47    |
| cannabinoid receptor interacting protein 1     | 29    |

|                                                |       |
|------------------------------------------------|-------|
| ninjurin 2                                     | 11    |
| Uncharacterized protein; cDNA FLJ46300 fis, cl | 5     |
| BCL2-like 2                                    | 1380  |
| myelin protein zero-like 3                     | 59    |
| wingless-type MMTV integration site family, me | 2080  |
| Ras association (RalGDS/AF-6) domain family me | 515   |
| adaptor-related protein complex 3, mu 1 subuni | 601   |
| programmed cell death 5                        | 158   |
| tumor necrosis factor, alpha-induced protein 8 | 5     |
| LIM domain and actin binding 1                 | 780   |
| destrin (actin depolymerizing factor)          | 10116 |
| xylosylprotein beta 1,4-galactosyltransferase, | 2968  |
| neurexin 2                                     | 5     |
| solute carrier family 2 (facilitated glucose t | 14    |
| cofilin 1 (non-muscle)                         | 341   |
| acyl-CoA thioesterase 4                        | 5     |
| chromosome 16 open reading frame 47            | 8     |
| yippee-like 5 (Drosophila)                     | 307   |
| arginine decarboxylase                         | 15    |
| BCL2/adenovirus E1B 19kD interacting protein 1 | 13    |
| Wolf-Hirschhorn syndrome candidate 1-like 1    | 481   |
| DDB1 and CUL4 associated factor 12-like 2      | 20    |
| transmembrane protein 165                      | 2603  |
| protein O-glucosyltransferase 1                | 262   |
| chymotrypsin C (caldecrin)                     | 5     |
| family with sequence similarity 118, member B  | 788   |
| establishment of sister chromatid cohesion N-a | 94    |
| butyrophilin, subfamily 3, member A1           | 5     |
| thyroid peroxidase                             | 5     |
| RAB7A, member RAS oncogene family              | 7894  |
| olfactomedin-like 2B                           | 5     |
| delta(4)-desaturase, sphingolipid 2            | 5     |
| growth factor independent 1 transcription repr | 154   |
| tetratricopeptide repeat domain 26             | 211   |
| VAMP (vesicle-associated membrane protein)-ass | 391   |
| nuclear receptor subfamily 1, group I, member  | 5     |
| CD302 molecule                                 | 860   |
| vestigial like 2 (Drosophila)                  | 5     |
| nonhomologous end-joining factor 1             | 33    |
| muskelin 1, intracellular mediator containing  | 477   |
| Rho guanine nucleotide exchange factor (GEF) 1 | 815   |
| Sep (O-phosphoserine) tRNA:Sec (selenocysteine | 279   |
| developmental pluripotency associated 4        | 5     |
| RecQ mediated genome instability 1             | 409   |
| Rho GTPase activating protein 19               | 1051  |
| protein phosphatase, Mg2+/Mn2+ dependent, 1L   | 59    |
| dynactin associated protein                    | 5     |
| extracellular matrix protein 1                 | 575   |
| mitochondrial elongation factor 1              | 2319  |
| multiple C2 domains, transmembrane 2           | 59    |
| family with sequence similarity 126, member B  | 132   |
| endothelin receptor type A                     | 35    |
| CSRP2 binding protein                          | 408   |
| male-specific lethal 1 homolog (Drosophila)    | 4715  |



|                                                |      |
|------------------------------------------------|------|
| coiled-coil domain containing 155              | 5    |
| UDP-GlcNAc:betaGal beta-1,3-N-acetylglucosamin | 5    |
| collagen, type XXII, alpha 1                   | 5    |
| family with sequence similarity 46, member B   | 18   |
| holocytochrome c synthase                      | 1615 |
| fyn-related kinase                             | 37   |
| chromosome 17 open reading frame 51            | 464  |
| potassium voltage-gated channel, subfamily H ( | 157  |
| phosphatidylserine synthase 1                  | 91   |
| deiodinase, iodothyronine, type I              | 5    |
| neurensin 2                                    | 101  |
| ankyrin repeat domain 13C                      | 369  |
| lin-54 homolog (C. elegans)                    | 228  |
| sparc/osteonectin, cwcv and kazal-like domains | 935  |
| translocase of inner mitochondrial membrane 10 | 290  |
| transmembrane 9 superfamily member 2           | 5046 |
| V-set and transmembrane domain containing 2A   | 5    |
| G protein-coupled receptor 151                 | 5    |
| chromosome 9 open reading frame 170            | 5    |
| olfactory receptor, family 2, subfamily H, mem | 5    |
| solute carrier family 2 (facilitated glucose t | 5    |
| retinol dehydrogenase 12 (all-trans/9-cis/11-c | 20   |
| mesencephalic astrocyte-derived neurotrophic f | 1895 |
| mitogen-activated protein kinase kinase kinase | 187  |
| methyltransferase like 7B                      | 58   |
| sodium leak channel, non-selective             | 5    |
| succinate dehydrogenase complex assembly facto | 545  |
| Vpr (HIV-1) binding protein                    | 102  |
| tectonic family member 3                       | 1900 |
| coiled-coil domain containing 141              | 5    |
| coiled-coil domain containing 94               | 127  |
| SRY (sex determining region Y)-box 9           | 2595 |
| LRP2 binding protein                           | 5    |
| leucine-rich repeats and immunoglobulin-like d | 241  |
| carbonic anhydrase XII                         | 42   |
| MAX dimerization protein 4                     | 1173 |
| CD207 molecule, langerin                       | 5    |
| neuroblastoma breakpoint family, member 6      | 5    |
| R-spondin 3                                    | 118  |
| ankyrin repeat and death domain containing 1B  | 18   |
| G protein-coupled receptor 61                  | 5    |
| ankyrin repeat and SOCS box containing 6       | 725  |
| urotensin 2B                                   | 13   |
| SEC62 homolog (S. cerevisiae)                  | 746  |
| tetratricopeptide repeat domain 30B            | 63   |
| ubiquitin family domain containing 1           | 6826 |
| Dexi homolog (mouse)                           | 1646 |
| ectonucleoside triphosphate diphosphohydrolase | 136  |
| caspase recruitment domain family, member 8    | 159  |
| acidic (leucine-rich) nuclear phosphoprotein 3 | 1003 |
| tripartite motif containing 14                 | 44   |
| RAD21 homolog (S. pombe)                       | 5    |
| leukocyte receptor cluster (LRC) member 8      | 244  |
| GA binding protein transcription factor, alpha | 8    |

|                                                        |      |
|--------------------------------------------------------|------|
| dopamine receptor D2                                   | 5    |
| neuropeptide Y receptor Y2                             | 5    |
| dynamin 3                                              | 59   |
| melanoma antigen family D, 4                           | 5    |
| UDP-Gal:betaGlcNAc beta 1,3-galactosyltransferase      | 5    |
| syndecan binding protein (syntenin)                    | 1071 |
| cytochrome P450, family 2, subfamily A, polypeptide    | 5    |
| casein kinase 2, alpha 1 polypeptide                   | 1927 |
| melanoma antigen family D, 4B                          | 5    |
| spermatogenesis associated 19                          | 5    |
| sema domain, transmembrane domain (TM), and cytochrome | 106  |
| dehydrodolichyl diphosphate synthase                   | 325  |
| zinc finger protein 384                                | 8    |
| leucine zipper protein 2                               | 33   |
| Fas (TNFRSF6)-associated via death domain              | 79   |
| potassium voltage-gated channel, Shal-related          | 23   |
| serine incorporator 3                                  | 1218 |
| chromosome 5 open reading frame 24                     | 2668 |
| solute carrier family 16, member 14                    | 34   |
| DnaJ (Hsp40) homolog, subfamily A, member 3            | 3281 |
| phosphoinositide-3-kinase, regulatory subunit          | 5    |
| keratin associated protein 5-11                        | 5    |
| ubiquitin specific peptidase 28                        | 85   |
| cytochrome b561 family, member D2                      | 6    |
| transmembrane protein 253                              | 25   |
| mab-21-like 2 (C. elegans)                             | 63   |
| spermine synthase                                      | 14   |
| steroid-5-alpha-reductase, alpha polypeptide 1         | 2684 |
| CD47 molecule                                          | 520  |
| tumor necrosis factor receptor superfamily, member 1   | 93   |
| solute carrier family 13 (sodium-dependent citrate)    | 4848 |
| zinc finger protein 805                                | 58   |
| chromosome 1 open reading frame 61                     | 5    |
| butyrophilin, subfamily 1, member A1                   | 5    |
| lymphocyte transmembrane adaptor 1                     | 5    |
| zinc finger E-box binding homeobox 1                   | 59   |
| ADP-ribosylation factor interacting protein 2          | 798  |
| chromosome 9 open reading frame 91                     | 151  |
| nudE neurodevelopment protein 1-like 1                 | 396  |
| protein tyrosine phosphatase-like (proline isomerase)  | 1275 |
| RAP2B, member of RAS oncogene family                   | 594  |
| scinderin                                              | 23   |
| SEC14-like 1 (S. cerevisiae)                           | 1399 |
| NME/NM23 nucleoside diphosphate kinase 2               | 191  |
| dynein, light chain, roadblock-type 1                  | 970  |
| QKI, KH domain containing, RNA binding                 | 323  |
| pleckstrin homology domain containing, family 1        | 1358 |
| DAZ associated protein 2                               | 4265 |
| calcium/calmodulin-dependent protein kinase kinase 2   | 1157 |
| BCL2-like 11 (apoptosis facilitator)                   | 105  |
| formin binding protein 1-like                          | 219  |
| glutamate decarboxylase 2 (pancreatic islets alpha)    | 5    |
| radixin                                                | 44   |
| zinc finger protein 8                                  | 24   |

|                                                |      |
|------------------------------------------------|------|
| SIX homeobox 3                                 | 15   |
| feline leukemia virus subgroup C cellular rece | 29   |
| doublesex and mab-3 related transcription fact | 21   |
| transmembrane protein with metallophosphoester | 22   |
| neuronal pentraxin I                           | 1876 |
| CD109 molecule                                 | 1272 |
| heart and neural crest derivatives expressed 2 | 30   |
| transmembrane protein 200A                     | 1609 |
| chromosome 18 open reading frame 21            | 410  |
| homeobox C10                                   | 152  |
| unc-5 homolog D (C. elegans)                   | 37   |
| solute carrier family 31 (copper transporter), | 171  |
| frizzled family receptor 3                     | 192  |
| ezrin                                          | 3757 |
| BTB (POZ) domain containing 9                  | 65   |
| STT3B, subunit of the oligosaccharyltransferas | 4458 |
| tubulin tyrosine ligase-like family, member 7  | 93   |
| RAB33B, member RAS oncogene family             | 270  |
| neurocalcin delta                              | 49   |
| chromosome 21 open reading frame 49            | 5    |
| cutaneous T-cell lymphoma-associated antigen 1 | 5    |
| keratin associated protein 4-12                | 31   |
| chromosome 12 open reading frame 40            | 5    |
| galactose mutarotase (aldose 1-epimerase)      | 963  |
| Uncharacterized protein                        | 9    |
| erythrocyte membrane protein band 4.1-like 2   | 353  |
| transmembrane protein 106B                     | 615  |
| mitochondrial calcium uniporter                | 2421 |
| nuclear factor of activated T-cells 5, tonicit | 128  |
| regulatory factor X, 3 (influences HLA class I | 37   |
| shisa family member 9                          | 5    |
| asparaginase homolog (S. cerevisiae)           | 5    |
| solute carrier family 17 (vesicular glutamate  | 5    |
| dynein assembly factor with WDR repeat domains | 82   |
| sprouty-related, EVH1 domain containing 2      | 53   |
| CUGBP, Elav-like family member 2               | 45   |
| sorting nexin 18                               | 174  |
| sterol O-acyltransferase 2                     | 823  |
| non-SMC condensin I complex, subunit H         | 217  |
| secretory carrier membrane protein 2           | 101  |
| glypican 2                                     | 52   |
| presenilin enhancer gamma secretase subunit    | 322  |
| zinc finger protein 41                         | 86   |
| RAB31, member RAS oncogene family              | 726  |
| golgin A1                                      | 334  |
| histone cluster 1, H2bd                        | 236  |
| caspase 2, apoptosis-related cysteine peptidas | 274  |
| Hepatoma-derived growth factor-related protein | 2577 |
| ELOVL fatty acid elongase 7                    | 52   |
| protein-L-isoaspartate (D-aspartate) O-methylt | 136  |
| SLAM family member 6                           | 5    |
| guanine nucleotide binding protein (G protein) | 50   |
| family with sequence similarity 83, member A   | 22   |
| thymocyte selection associated family member 2 | 41   |

|                                                 |       |
|-------------------------------------------------|-------|
| F-box and WD repeat domain containing 11        | 81    |
| major histocompatibility complex, class I, G    | 5     |
| gap junction protein, beta 6, 30kDa             | 5     |
| leucine-rich repeat kinase 2                    | 37    |
| acyl-CoA dehydrogenase family, member 8         | 329   |
| HRAS-like suppressor family, member 5           | 5     |
| signaling threshold regulating transmembrane a  | 7     |
| lysosomal-associated membrane protein 3         | 11    |
| ATPase, class II, type 9A                       | 1511  |
| BCL2/adenovirus E1B 19kDa interacting protein   | 203   |
| guanylate binding protein 4                     | 5     |
| transmembrane protein 100                       | 86    |
| fibulin 7                                       | 44    |
| LOC644617 protein; Uncharacterized protein      | 430   |
| interleukin-1 receptor-associated kinase 4      | 223   |
| MANSC domain containing 1                       | 185   |
| hook microtubule-tethering protein 3            | 403   |
| desumoylating isopeptidase 2                    | 147   |
| guanylate binding protein family, member 6      | 5     |
| solute carrier family 1 (glial high affinity g  | 5     |
| colony stimulating factor 2 receptor, beta, lo  | 5     |
|                                                 | 5     |
| ankyrin repeat and BTB (POZ) domain containing  | 180   |
| polymerase (DNA-directed), delta 3, accessory   | 371   |
| family with sequence similarity 98, member A    | 89    |
| protein kinase C, iota                          | 103   |
| Lix1 homolog (mouse)-like                       | 695   |
| pyruvate dehydrogenase phosphatase catalytic su | 102   |
| cell division cycle 20B                         | 5     |
| calreticulin                                    | 17017 |
| SYS1 Golgi-localized integral membrane protein  | 384   |
| pleckstrin homology domain containing, family   | 767   |
| sphingosine-1-phosphate receptor 1              | 251   |
| GRB2-associated binding protein 2               | 627   |
| mastermind-like 2 (Drosophila)                  | 104   |
| chromosome 14 open reading frame 23             | 5     |
| solute carrier family 2 (facilitated glucose t  | 17    |
| sodium channel, voltage-gated, type IV, beta s  | 13    |
| mitogen-activated protein kinase 10             | 5     |
| chromosome 1 open reading frame 158             | 5     |
| deleted in azoospermia 3                        | 5     |
| cannabinoid receptor 1 (brain)                  | 40    |
| cyclin-dependent kinase 6                       | 1116  |
| tripartite motif containing 8                   | 525   |
| SLP adaptor and CSK interacting membrane prote  | 5     |
| Iron/zinc purple acid phosphatase-like protein  | 5     |
| aldo-keto reductase family 1, member E2         | 5     |
| hepatocyte nuclear factor 4, gamma              | 5     |
| plasmolipin                                     | 22    |
| MOB kinase activator 1B                         | 54    |
| seryl-tRNA synthetase 2, mitochondrial          | 700   |
| solute carrier family 22 (organic anion/urate   | 5     |
| otogelin-like                                   | 5     |
| otopettrin 2                                    | 5     |

|                                                |      |
|------------------------------------------------|------|
| upstream binding protein 1 (LBP-1a)            | 1418 |
| zinc finger protein 585B                       | 46   |
| syntaxin 7                                     | 1395 |
| astrotactin 2                                  | 39   |
| sorting nexin 19                               | 1157 |
| coagulation factor VIII, procoagulant componen | 16   |
| collagen, type XXV, alpha 1                    | 270  |
| ribosomal protein S9                           | 54   |
| bromodomain adjacent to zinc finger domain, 2B | 25   |
| synuclein, beta                                | 5    |
| pyrimidinergic receptor P2Y, G-protein coupled | 5    |
| testis expressed 35                            | 5    |
| programmed cell death 7                        | 64   |
| zinc finger protein, Y-linked                  | 5    |
| WD repeat domain 70                            | 23   |
| coiled-coil domain containing 88A              | 141  |
| homeobox A3                                    | 57   |
| zinc finger CCCH-type, antiviral 1             | 45   |
| nuclear receptor subfamily 6, group A, member  | 1082 |
| histone cluster 1, H2bn                        | 29   |
| claspin                                        | 92   |
| glycerol kinase 5 (putative)                   | 73   |
| retinol dehydrogenase 16 (all-trans)           | 13   |
| zinc finger protein 441                        | 5    |
| deleted in azoospermia 4                       | 5    |
| regulator of chromosome condensation 1         | 1156 |
| chromosome 19 open reading frame 66            | 567  |
| mitochondrial inner membrane organizing system | 287  |
| UDP-N-acetyl-alpha-D-galactosamine:polypeptide | 114  |
| integrin, alpha L (antigen CD11A (p180), lymph | 340  |
| ATP-binding cassette, sub-family A (ABC1), mem | 5    |
| N-acetyltransferase 16 (GCN5-related, putative | 5    |
| fatty acid binding protein 7, brain            | 5    |
| NADH dehydrogenase (ubiquinone) complex I, ass | 68   |
| pre-mRNA processing factor 4B                  | 602  |
| family with sequence similarity 169, member B  | 5    |
| septin 3                                       | 241  |
| tumor protein D52-like 3                       | 5    |
| Fc receptor-like 6                             | 5    |
| melanoma associated antigen (mutated) 1-like 1 | 50   |
| transmembrane protein 62                       | 9    |
| angiomin like 1                                | 712  |
| protein tyrosine phosphatase, non-receptor typ | 301  |
| proline-rich coiled-coil 1                     | 2351 |
| zinc finger CCCH-type containing 12C           | 150  |
| PILR alpha associated neural protein           | 8    |
| antagonist of mitotic exit network 1 homolog ( | 125  |
| grainyhead-like 2 (Drosophila)                 | 5    |
| lactate dehydrogenase A                        | 375  |
| NLR family member X1                           | 36   |
| sodium channel, voltage gated, type VIII, alph | 44   |
| C-type lectin domain family 4, member D        | 5    |
| coronin, actin binding protein, 1C             | 1970 |
| recoverin                                      | 5    |

|                                                            |      |
|------------------------------------------------------------|------|
| La ribonucleoprotein domain family, member 4               | 35   |
| FERM domain containing 5                                   | 161  |
| mitogen-activated protein kinase kinase kinase             | 634  |
| bone morphogenetic protein 7                               | 83   |
| zinc binding alcohol dehydrogenase domain cont             | 207  |
| zinc finger protein 709                                    | 90   |
| mannosidase, endo-alpha-like                               | 381  |
|                                                            | 51   |
| potassium channel, subfamily K, member 13                  | 11   |
| tachykinin receptor 2                                      | 5    |
| cytosolic iron-sulfur protein assembly 1                   | 1143 |
| Zic family member 2                                        | 1173 |
| sodium channel, voltage-gated, type III, beta              | 10   |
| CD72 molecule                                              | 7    |
| zinc finger and BTB domain containing 41                   | 33   |
| coiled-coil domain containing 50                           | 961  |
| polycomb group ring finger 5                               | 176  |
| deleted in colorectal carcinoma                            | 5    |
| matrix metalloproteinase 16 (membrane-inserted)            | 12   |
| zinc fingers and homeoboxes 1                              | 88   |
| sodium channel, non-voltage-gated 1, beta subu             | 5    |
| fibrillin 1                                                | 798  |
| pellino E3 ubiquitin protein ligase family mem             | 257  |
| trafficking protein, kinesin binding 2                     | 353  |
| potassium voltage-gated channel, subfamily G,              | 0    |
| glutathione S-transferase mu 1                             | 5    |
| CD83 molecule                                              | 414  |
| hematopoietic cell-specific Lyn substrate 1                | 6    |
| synaptotagmin IV                                           | 11   |
| chromosome 1 open reading frame 213                        | 49   |
| NECAP endocytosis associated 1                             | 13   |
| collagen, type V, alpha 2                                  | 4327 |
| family with sequence similarity 69, member A               | 171  |
| collagen, type IV, alpha 3 (Goodpasture antige             | 286  |
| Serine--tRNA ligase, mitochondrial                         | 700  |
| tumor necrosis factor (ligand) superfamily, me             | 85   |
| ATPase, H <sup>+</sup> transporting, lysosomal accessory p | 2095 |
| matrix-remodelling associated 7                            | 421  |
| leucine rich repeat neuronal 4                             | 5    |
| phosphatidylserine decarboxylase                           | 61   |
| deleted in azoospermia 2                                   | 5    |
| ubiquitin specific peptidase 51                            | 26   |
| inhibitor of CDK, cyclin A1 interacting protei             | 6    |
| phosphate cytidyltransferase 1, choline, bet               | 5    |
| prickle homolog 2 (Drosophila)                             | 20   |
| platelet-activating factor acetylhydrolase 2,              | 287  |
| glutamyl aminopeptidase (aminopeptidase A)                 | 10   |
| aldehyde dehydrogenase 9 family, member A1                 | 4094 |
| transmembrane 9 superfamily protein member 4               | 3096 |
| solute carrier family 6 (neurotransmitter tran             | 280  |
| cellular repressor of E1A-stimulated genes 1               | 318  |
| phosphatidylinositol-4,5-bisphosphate 3-kinase             | 5    |
| myeloma overexpressed                                      | 14   |
| coilin                                                     | 5    |

|                                                 |      |
|-------------------------------------------------|------|
| tetratricopeptide repeat domain 18              | 7    |
| myocyte enhancer factor 2B                      | 35   |
| CD300 molecule-like family member g             | 5    |
| membrane-associated ring finger (C3HC4) 8, E3   | 48   |
| polymerase (RNA) III (DNA directed) polypeptid  | 67   |
| dysferlin                                       | 47   |
| pyroglutamylated RFamide peptide receptor       | 0    |
| zinc finger protein 852                         | 26   |
| sorting nexin 17                                | 479  |
| Kruppel-like factor 15                          | 7    |
| isopentenyl-diphosphate delta isomerase 1       | 827  |
| hyperpolarization activated cyclic nucleotide-  | 41   |
| suppressor of defective silencing 3 homolog (S  | 224  |
| ERO1-like (S. cerevisiae)                       | 1333 |
| mediator complex subunit 8                      | 745  |
| complement component 5a receptor 1              | 5    |
| KN motif and ankyrin repeat domains 2           | 1735 |
| cystinosin, lysosomal cystine transporter       | 308  |
| leukocyte immunoglobulin-like receptor, subfam  | 5    |
| tafazzin                                        | 1269 |
| Ca <sup>++</sup> -dependent secretion activator | 5    |
| family with sequence similarity 133, member A   | 14   |
| nicotinamide nucleotide adenyltransferase 2     | 18   |
| family with sequence similarity 180, member A   | 51   |
| DnaJ (Hsp40) homolog, subfamily A, member 1     | 789  |
| histone deacetylase 9                           | 13   |
| cAMP responsive element binding protein 5       | 54   |
| transmembrane BAX inhibitor motif containing 1  | 2201 |
| G protein-coupled receptor 135                  | 40   |
| phosphoinositide-3-kinase, regulatory subunit   | 335  |
| protein phosphatase 1, regulatory subunit 12A   | 276  |
| jumonji domain containing 8                     | 164  |
| ADP-ribosylation factor-like 2                  | 7073 |
| vesicle-associated membrane protein 1 (synapto  | 8    |
| protein tyrosine phosphatase, non-receptor typ  | 52   |
| NK1 homeobox 2                                  | 5    |
| spermatogenesis and oogenesis specific basic h  | 15   |
| F-box protein 21                                | 1035 |
| glyceraldehyde-3-phosphate dehydrogenase, sper  | 5    |
| phosphatidylinositol-4-phosphate 3-kinase, cat  | 5    |
| sortilin-related VPS10 domain containing recep  | 85   |
| RAB, member of RAS oncogene family-like 3       | 165  |
| coiled-coil domain containing 103               | 72   |
| sirtuin 1                                       | 220  |
| FGFR1 oncogene partner 2                        | 104  |
| membrane magnesium transporter 1                | 113  |
| ADAM-like, decysin 1                            | 5    |
| cholinergic receptor, nicotinic, beta 1 (muscl  | 56   |
| mitochondrial ribosomal protein S11             | 1452 |
| coiled-coil domain containing 140               | 5    |
| proline rich membrane anchor 1                  | 5    |
| hair growth associated                          | 248  |
| centrosomal protein 290kDa                      | 10   |
| tripartite motif containing 27                  | 492  |

|                                                |      |
|------------------------------------------------|------|
| transmembrane protease, serine 3               | 5    |
| T-box 5                                        | 68   |
| docking protein 5                              | 5    |
| Rho guanine nucleotide exchange factor (GEF) 7 | 361  |
| CXXC finger protein 4                          | 121  |
| chromosome 19 open reading frame 10            | 1263 |
| chaperonin containing TCP1, subunit 4 (delta)  | 153  |
| muscleblind-like splicing regulator 3          | 593  |
| ribosomal protein S6 kinase, 70kDa, polypeptid | 16   |
| monoamine oxidase B                            | 32   |
| family with sequence similarity 178, member A  | 130  |
| zinc finger protein 260                        | 165  |
| hyperpolarization activated cyclic nucleotide- | 19   |
| URGCP-MRPS24 readthrough                       | 110  |
| ubiquitin specific peptidase 39                | 6197 |
| guanylate cyclase 2C (heat stable enterotoxin  | 5    |
| copine III                                     | 756  |
| APEX nuclease (apurinic/aprimidinic endonucle  | 972  |
| polymerase (RNA) I polypeptide D, 16kDa        | 2372 |
| solute carrier family 16 (monocarboxylate tran | 707  |
| mitochondrial ribosomal protein L50            | 56   |
| chromosome 12 open reading frame 61            | 5    |
| receptor-interacting serine-threonine kinase 3 | 5    |
| prostaglandin E synthase 3 (cytosolic)         | 93   |
| tripartite motif containing 44                 | 4203 |
| potassium inwardly-rectifying channel, subfami | 5    |
| protein kinase, X-linked                       | 12   |
| mindbomb E3 ubiquitin protein ligase 1         | 897  |
| signal-regulatory protein beta 1               | 5    |
| exportin 7                                     | 647  |
| Uncharacterized protein                        | 21   |
| zinc finger and SCAN domain containing 32      | 8    |
| KIAA1456                                       | 24   |
| KIAA1217                                       | 320  |
| NECAP endocytosis associated 2                 | 1011 |
| stannin                                        | 663  |
| solute carrier family 7, member 14             | 5    |
| RUN and FYVE domain containing 2               | 15   |
| solute carrier family 6 (proline IMINO transpo | 5    |
| fibroblast growth factor 7                     | 5    |
| NFAT activating protein with ITAM motif 1      | 7    |
| protease, serine, 8                            | 5    |
| zinc finger protein 302                        | 13   |
| leucine rich repeat containing 8 family, membe | 71   |
| heat shock 27kDa protein family, member 7 (car | 5    |
| lipoprotein lipase                             | 7658 |
| PR domain containing 6                         | 69   |
| von Willebrand factor C domain containing prot | 5    |
| Rap guanine nucleotide exchange factor (GEF) 6 | 38   |
| DBF4 homolog B (S. cerevisiae)                 | 34   |
| paired box 1                                   | 5    |
| immediate early response 5-like                | 24   |
| G1 to S phase transition 2                     | 97   |
| polymerase (RNA) III (DNA directed) polypeptid | 678  |



|                                                |      |
|------------------------------------------------|------|
| FYN binding protein                            | 5    |
| calcium/calmodulin-dependent protein kinase II | 938  |
| surfactant protein A1                          | 5    |
| breast carcinoma amplified sequence 3          | 339  |
| uncharacterized protein LOC100127983           | 579  |
| protease, serine, 16 (thymus)                  | 77   |
| striatin, calmodulin binding protein 3         | 697  |
| phosphatidylinositol-5-phosphate 4-kinase, typ | 148  |
| transmembrane protein 40                       | 5    |
| Protein LOC400655                              | 5    |
| pleckstrin 2                                   | 44   |
| bone morphogenetic protein receptor, type II ( | 287  |
| XK, Kell blood group complex subunit-related,  | 11   |
| IKAROS family zinc finger 3 (Aiolos)           | 7    |
| pleiomorphic adenoma gene 1                    | 58   |
| ganglioside induced differentiation associated | 37   |
| CXXC finger protein 5                          | 1285 |
| UDP-N-acetyl-alpha-D-galactosamine:polypeptide | 83   |
| STEAP family member 4                          | 23   |
| ADAM metallopeptidase domain 28                | 5    |
| SWI/SNF-related, matrix-associated actin-depen | 371  |
| NLR family, CARD domain containing 3           | 5    |
| retrotransposon gag domain containing 1        | 5    |
| chromosome 14 open reading frame 159           | 5    |
| Leucine-rich repeat-containing protein LOC4008 | 5    |
| topoisomerase (DNA) III alpha                  | 427  |
| myocardial zonula adherens protein             | 10   |
| chromosome 15 open reading frame 54            | 5    |
| prenylcysteine oxidase 1                       | 407  |
| vimentin-type intermediate filament associated | 28   |
| zinc finger protein 488                        | 61   |
| UBA-like domain containing 2                   | 506  |
| malic enzyme 1, NADP(+)-dependent, cytosolic   | 586  |
| cell division cycle 7                          | 416  |
| metaxin 3                                      | 304  |
| axin interactor, dorsalization associated      | 48   |
| protein tyrosine phosphatase, receptor type, B | 42   |
| heat shock 70kDa protein 9 (mortalin)          | 573  |
| coiled-coil domain containing 92               | 105  |
| ankyrin repeat domain 36                       | 5    |
| potassium voltage-gated channel, Shab-related  | 5    |
| proline-rich transmembrane protein 2           | 33   |
| choroideremia-like (Rab escort protein 2)      | 140  |
| cyclin-dependent kinase-like 4                 | 5    |
| SAM and SH3 domain containing 3                | 5    |
| estrogen receptor 2 (ER beta)                  | 5    |
| major facilitator superfamily domain containin | 5122 |
| caspase 9, apoptosis-related cysteine peptidas | 390  |
| GRIP and coiled-coil domain containing 1       | 26   |
| transforming growth factor, beta receptor asso | 435  |
| chromosome 17 open reading frame 80            | 740  |
| synaptotagmin binding, cytoplasmic RNA interac | 4864 |
| SIX homeobox 1                                 | 1264 |
| Rho guanine nucleotide exchange factor (GEF) 1 | 326  |

|                                                |      |
|------------------------------------------------|------|
| glutamate receptor, ionotropic, AMPA 4         | 7    |
| zinc finger and BTB domain containing 12       | 18   |
|                                                | 185  |
| somatostatin receptor 1                        | 28   |
| HCG2018282; Uncharacterized protein            | 5    |
| carnitine palmitoyltransferase 1A (liver)      | 869  |
| leprecan-like 1                                | 875  |
| plexin A4                                      | 9    |
| carbohydrate (chondroitin 4) sulfotransferase  | 686  |
| coiled-coil domain containing 113              | 29   |
| calmodulin-lysine N-methyltransferase          | 18   |
| testis expressed 22                            | 9    |
| phosphatidylinositol binding clathrin assembly | 1173 |
| heat shock protein 70kDa family, member 13     | 2175 |
| MDS1 and EVI1 complex locus                    | 138  |
| protein arginine methyltransferase 6           | 270  |
| BEN domain containing 4                        | 187  |
| transmembrane protein 140                      | 858  |
| trypsin domain containing 1                    | 35   |
| gem (nuclear organelle) associated protein 8   | 9    |
| chromosome 7 open reading frame 31             | 40   |
| enoyl-CoA, hydratase/3-hydroxyacyl CoA dehydro | 150  |
| ribosomal protein S6 kinase, 52kDa, polypeptid | 57   |
| carbohydrate sulfotransferase 10               | 33   |
| surfactant protein A2                          | 5    |
|                                                | 5    |
| grainyhead-like 3 (Drosophila)                 | 15   |
| proline and serine rich 1                      | 145  |
| kallikrein-related peptidase 7                 | 5    |
| breast carcinoma amplified sequence 4          | 492  |
| lysophospholipase I                            | 57   |
| leucine rich adaptor protein 1-like            | 266  |
| solute carrier family 25 (mitochondrial carrie | 206  |
| K(lysine) acetyltransferase 7                  | 48   |
| Cell growth-inhibiting protein 7; HCG1784586;  | 9    |
| POM121 transmembrane nucleoporin-like 2        | 0    |
| interleukin 9 receptor                         | 5    |
| activation-induced cytidine deaminase          | 5    |
| solute carrier family 10 (sodium/bile acid cot | 5    |
| A kinase (PRKA) anchor protein 1               | 843  |
| zinc finger with KRAB and SCAN domains 1       | 1314 |
| nanos homolog 2 (Drosophila)                   | 5    |
| family with sequence similarity 19 (chemokine  | 5    |
| leucine rich repeat containing 66              | 5    |
| son of sevenless homolog 2 (Drosophila)        | 70   |
| chromosome 7 open reading frame 73             | 847  |
| zinc finger protein 507                        | 378  |
| carcinoembryonic antigen-related cell adhesion | 5    |
| basonuclin 2                                   | 770  |
| sel-1 suppressor of lin-12-like (C. elegans)   | 1271 |
| family with sequence similarity 109, member A  | 780  |
| DCN1, defective in cullin neddylation 1, domai | 53   |
| cornichon family AMPA receptor auxiliary prote | 1348 |
| zinc finger protein 280B                       | 7    |

|                                                        |      |
|--------------------------------------------------------|------|
| ER01-like beta ( <i>S. cerevisiae</i> )                | 478  |
| histone cluster 1, H3h                                 | 256  |
| HCG2000720; Hypothetical gene supported by AKO         | 5    |
| WBP2 N-terminal like                                   | 5    |
| orthopedia homeobox                                    | 9    |
| kallikrein-related peptidase 12                        | 5    |
| schlafen-like 1                                        | 5    |
| synaptic Ras GTPase activating protein 1               | 15   |
| STAM binding protein                                   | 1274 |
| ALG10B, alpha-1,2-glucosyltransferase                  | 471  |
| solute carrier family 25, member 45                    | 67   |
| deleted in azoospermia 1                               | 5    |
| LY75-CD302 readthrough                                 | 855  |
| lymphocyte antigen 75                                  | 855  |
| EP300 interacting inhibitor of differentiation         | 156  |
| achaete-scute complex homolog 4 ( <i>Drosophila</i> )  | 5    |
| v-maf avian musculoaponeurotic fibrosarcoma on         | 5    |
| mediator complex subunit 18                            | 1766 |
| short coiled-coil protein                              | 922  |
| lengsin, lens protein with glutamine synthetas         | 21   |
| family with sequence similarity 220, member A          | 15   |
| protein kinase, cAMP-dependent, catalytic, bet         | 344  |
| Uncharacterized protein                                | 5    |
| zinc finger protein 865                                | 75   |
| TOX high mobility group box family member 4            | 309  |
| ring finger protein 141                                | 345  |
| RNA binding motif protein 28                           | 297  |
| bone morphogenetic protein receptor, type IA           | 125  |
| proteasome (prosome, macropain) activator subu         | 3605 |
| KIAA0825                                               | 34   |
| membrane protein, palmitoylated 7 (MAGUK p55 s         | 50   |
| SWI/SNF related, matrix associated, actin depe         | 952  |
| internexin neuronal intermediate filament prot         | 46   |
| transmembrane protein 135                              | 963  |
| angiopoietin-like 2                                    | 39   |
| syntrophin, gamma 1                                    | 5    |
| ankyrin repeat domain 16                               | 82   |
| toll-like receptor 5                                   | 5    |
| bromodomain containing 2                               | 695  |
| clarin 1                                               | 5    |
| pseudouridylate synthase 7 homolog ( <i>S. cerevis</i> | 67   |
| SPHK1 interactor, AKAP domain containing               | 5    |
| transmembrane and coiled-coil domains 1                | 4447 |
| solute carrier family 17 (vesicular glutamate          | 12   |
| multiple inositol-polyphosphate phosphatase 1          | 1079 |
| protein tyrosine phosphatase type IVA, member          | 5    |
| carbohydrate (N-acetylgalactosamine 4-0) sulfo         | 1143 |
| ubiquitin related modifier 1                           | 345  |
| zinc finger, FYVE domain containing 27                 | 565  |
| phosphatase and actin regulator 4                      | 85   |
| inositol polyphosphate-4-phosphatase, type II,         | 43   |
| family with sequence similarity 49, member A           | 38   |
| general transcription factor IIIH, polypeptide         | 121  |
| carcinoembryonic antigen-related cell adhesion         | 11   |

|                                                |       |
|------------------------------------------------|-------|
| transmembrane protein 119                      | 5     |
| G protein-coupled receptor 85                  | 21    |
| forkhead box 04                                | 48    |
| collagen, type IX, alpha 1                     | 9     |
| methionyl-tRNA synthetase 2, mitochondrial     | 391   |
| protein phosphatase 1, regulatory subunit 18   | 265   |
| RNA polymerase II associated protein 2         | 222   |
| zinc finger, NFX1-type containing 1            | 41    |
| synaptic vesicle glycoprotein 2C               | 30    |
| Uncharacterized protein                        | 22    |
| F11 receptor                                   | 2844  |
| glucosamine (UDP-N-acetyl)-2-epimerase/N-acety | 22    |
| apoptosis, caspase activation inhibitor        | 230   |
| zinc finger and BTB domain containing 26       | 83    |
| coiled-coil-helix-coiled-coil-helix domain con | 97    |
| LON peptidase N-terminal domain and ring finge | 36    |
| N-acetyltransferase 14 (GCN5-related, putative | 392   |
| chromosome 2 open reading frame 50             | 5     |
| protein phosphatase 3, regulatory subunit B, b | 5     |
| transmembrane protein 87B                      | 219   |
| chromosome 11 open reading frame 88            | 5     |
| G protein-coupled receptor 153                 | 39    |
| acyl-CoA wax alcohol acyltransferase 1         | 5     |
| chromosome 6 open reading frame 201            | 5     |
| ADP-ribosylation factor 6                      | 31    |
| serine racemase                                | 95    |
| anaphase promoting complex subunit 7           | 819   |
| zyg-11 family member A, cell cycle regulator   | 331   |
| paired related homeobox 1                      | 57    |
| ubiquitin protein ligase E3 component n-recogn | 468   |
| myosin phosphatase Rho interacting protein     | 521   |
| p21 protein (Cdc42/Rac)-activated kinase 1     | 374   |
| poliovirus receptor-related 3                  | 361   |
| mediator complex subunit 28                    | 1483  |
| protein phosphatase 1, regulatory subunit 3A   | 5     |
| chloride channel accessory 2                   | 5     |
| WW domain binding protein 2                    | 362   |
| SWI/SNF related, matrix associated, actin depe | 158   |
| synaptosomal-associated protein, 91kDa         | 68    |
| tenascin R                                     | 5     |
| Uncharacterized protein; cDNA FLJ43210 fis, cl | 7     |
| trophoblast glycoprotein-like                  | 8     |
| dihydropyrimidinase-like 2                     | 3087  |
| molybdenum cofactor synthesis 1                | 179   |
| fibrous sheath interacting protein 1           | 10    |
| chemokine (C-C motif) receptor 9               | 5     |
| jumonji C domain containing histone demethylas | 470   |
| thrombospondin 1                               | 46844 |
| potassium channel tetramerization domain conta | 36    |
| family with sequence similarity 213, member B  | 409   |
| transient receptor potential cation channel, s | 11    |
| solute carrier family 31 (copper transporter), | 110   |
| prostaglandin D2 synthase 21kDa (brain)        | 13    |
| zinc finger and SCAN domain containing 9       | 121   |

|                                                            |      |
|------------------------------------------------------------|------|
| neuroblastoma breakpoint family, member 4                  | 5    |
| transmembrane protein 30A                                  | 1221 |
| nuclear receptor subfamily 2, group F, member              | 4428 |
| transcription factor AP-4 (activating enhancer             | 13   |
| zinc finger protein 580                                    | 154  |
| peptidyl arginine deiminase, type II                       | 11   |
| nuclear receptor coactivator 1                             | 200  |
| mago-nashi homolog B (Drosophila)                          | 63   |
| H1 histone family, member 0                                | 234  |
| transmembrane protein 127                                  | 296  |
| methionine sulfoxide reductase B3                          | 83   |
| zinc finger and BTB domain containing 46                   | 71   |
| transmembrane 4 L six family member 1                      | 1401 |
| phosphoprotein associated with glycosphingolip             | 53   |
| chromosome X open reading frame 36                         | 5    |
| HNF1 homeobox B                                            | 25   |
| estrogen receptor 1                                        | 5    |
| GTP binding protein 2                                      | 388  |
| INO80 complex subunit D                                    | 5    |
| RUN domain containing 3A                                   | 11   |
| zinc finger protein 160                                    | 68   |
| signal sequence receptor, gamma (translocon-as             | 6034 |
| chromosome 18 open reading frame 25                        | 688  |
| mitochondrial ribosomal protein L17                        | 1447 |
| ATPase, H <sup>+</sup> transporting, lysosomal 70kDa, V1 s | 180  |
| hydroxyacyl-CoA dehydrogenase                              | 1894 |
| dihydroxyacetone kinase 2 homolog (S. cerevisi             | 242  |
| zinc finger E-box binding homeobox 2                       | 33   |
| synaptosomal-associated protein, 23kDa                     | 99   |
| PH domain and leucine rich repeat protein phos             | 172  |
| PRAME family member 18                                     | 0    |
| catenin (cadherin-associated protein), alpha 3             | 5    |
| potassium channel, subfamily K, member 12                  | 5    |
| PRAME family member 19                                     | 5    |
| tetratricopeptide repeat domain 31                         | 132  |
| PITPNM family member 3                                     | 5    |
| TGF-beta activated kinase 1/MAP3K7 binding pro             | 201  |
| slit homolog 2 (Drosophila)                                | 579  |
| CD38 molecule                                              | 23   |
| TEA domain family member 1 (SV40 transcription             | 740  |
| tetratricopeptide repeat domain 33                         | 676  |
| KIAA1462                                                   | 360  |
| dual specificity phosphatase 28                            | 84   |
| cell cycle associated protein 1                            | 650  |
| APC membrane recruitment protein 2                         | 7    |
| Uncharacterized protein; cDNA FLJ34594 fis, cl             | 5    |
| PRAME family member 22                                     | 0    |
| 5-hydroxytryptamine (serotonin) receptor 1F, G             | 5    |
| D4, zinc and double PHD fingers family 2                   | 1164 |
| OTU domain containing 4                                    | 18   |
| PRAME family member 3                                      | 5    |
| protein phosphatase 2, regulatory subunit B, g             | 115  |
| complement component 7                                     | 5    |
| solute carrier family 26 (anion exchanger), me             | 748  |

|                                                  |      |
|--------------------------------------------------|------|
| transcription factor EC                          | 5    |
| carnosine dipeptidase 1 (metallopeptidase M20    | 5    |
| SUMO1 activating enzyme subunit 1                | 87   |
| B-cell receptor-associated protein 29            | 326  |
| serpin peptidase inhibitor, clade B (ovalbumin   | 295  |
| myelin protein zero-like 2                       | 260  |
| glycerol-3-phosphate dehydrogenase 2 (mitochon   | 196  |
| protein kinase, AMP-activated, beta 1 non-cata   | 99   |
| trinucleotide repeat containing 6B               | 69   |
| claudin 2                                        | 19   |
| arylacetamide deacetylase-like 4                 | 5    |
| low density lipoprotein receptor adaptor prote   | 111  |
| cyclin-dependent kinase 20                       | 25   |
| CGRP receptor component                          | 1776 |
| nephronectin                                     | 518  |
| KxDL motif containing 1                          | 117  |
| chromobox homolog 5                              | 360  |
| four and a half LIM domains 1                    | 239  |
| speckle-type POZ protein                         | 883  |
| dystroglycan 1 (dystrophin-associated glycopro   | 241  |
| exportin 1 (CRM1 homolog, yeast)                 | 404  |
| THAP domain containing 11                        | 1536 |
| solute carrier family 24 (sodium/potassium/cal   | 5    |
| Uncharacterized protein                          | 5    |
| spindlin family, member 2A                       | 5    |
| adrenoceptor beta 2, surface                     | 50   |
| ubinuclein 1                                     | 586  |
| WAS/WASL interacting protein family, member 2    | 214  |
| early B-cell factor 3                            | 101  |
| CKLF-like MARVEL transmembrane domain containi   | 169  |
| CD300 molecule-like family member b              | 5    |
| interferon-induced protein with tetratricopept   | 160  |
| CD96 molecule                                    | 5    |
| cyclin Y                                         | 672  |
| neuroblastoma breakpoint family, member 14       | 10   |
| zinc finger protein 485                          | 36   |
| abhydrolase domain containing 17C                | 406  |
| homeobox A5                                      | 63   |
| ribonuclease, RNase A family, 11 (non-active)    | 5    |
| RAP2A, member of RAS oncogene family             | 721  |
| sialic acid binding Ig-like lectin 10            | 5    |
| ankyrin repeat domain 27 (VPS9 domain)           | 349  |
| cytoplasmic FMR1 interacting protein 2           | 303  |
| gap junction protein, alpha 5, 40kDa             | 5    |
|                                                  | 5    |
| galactosidase, beta 1-like 2                     | 38   |
| chromosome 20 open reading frame 96              | 257  |
| ubiquitin specific peptidase 14 (tRNA-guanine    | 561  |
| transmembrane protein 173                        | 676  |
| DEAH (Asp-Glu-Ala-His) box polypeptide 33        | 724  |
| GrpE-like 2, mitochondrial (E. coli)             | 79   |
| serine/threonine kinase 32B                      | 196  |
| neurobeachin-like 1                              | 42   |
| progesterin and adipoQ receptor family member IV | 703  |

|                                                            |         |
|------------------------------------------------------------|---------|
| opioid receptor, kappa 1                                   | 5       |
| Uncharacterized protein; cDNA FLJ26048 fis, cl<br>KIAA0907 | 5<br>48 |
| G protein-coupled receptor 83                              | 33      |
| ectodysplasin A                                            | 9       |
| myosin, heavy chain 7B, cardiac muscle, beta               | 5       |
| glutathione S-transferase, C-terminal domain c             | 411     |
| bleomycin hydrolase                                        | 1511    |
| CD300c molecule                                            | 5       |
| protein kinase, AMP-activated, beta 2 non-cata             | 363     |
| chromosome 3 open reading frame 36                         | 8       |
| vomeronasal 1 receptor 1                                   | 12      |
| MAM domain containing 2                                    | 365     |
| keratin 80                                                 | 617     |
| serine palmitoyltransferase, long chain base s             | 2578    |
| UDP-Gal:betaGlcNAc beta 1,4- galactosyltransfe             | 2265    |
| plexin domain containing 1                                 | 9       |
| desmocollin 3                                              | 390     |
| Mitogen-activated protein kinase kinase kinase             | 405     |
| sal-like 1 (Drosophila)                                    | 95      |
| mitogen-activated protein kinase kinase kinase             | 144     |
| glutamine-fructose-6-phosphate transaminase 2              | 70      |
| APC membrane recruitment protein 1                         | 11      |
| S100 calcium binding protein A14                           | 5       |
| peptidase domain containing associated with mu             | 40      |
| SET and MYND domain containing 1                           | 5       |
| keratin 35                                                 | 5       |
| neuron navigator 1                                         | 702     |
| myotubularin related protein 10                            | 30      |
| purine-rich element binding protein G                      | 29      |
| cytochrome b5 domain containing 1                          | 546     |
| spindlin family, member 3                                  | 12      |
| myosin ID                                                  | 16      |
| solute carrier family 25 (mitochondrial iron t             | 49      |
| chromosome 21 open reading frame 62                        | 5       |
| target of myb1 (chicken)                                   | 309     |
| FRAS1 related extracellular matrix 1                       | 25      |
| MAS-related GPR, member X2                                 | 5       |
| thymocyte expressed, positive selection associ             | 5       |
| chromosome 11 open reading frame 68                        | 1192    |
| chromosome 17 open reading frame 58                        | 48      |
| pregnancy up-regulated non-ubiquitously expres             | 5       |
| Rac GTPase activating protein 1                            | 19      |
| microfibrillar associated protein 5                        | 216     |
| lines homolog (Drosophila)                                 | 18      |
| NME/NM23 nucleoside diphosphate kinase 1                   | 25174   |
| dCTP pyrophosphatase 1                                     | 820     |
| regulatory factor X, 4 (influences HLA class I             | 5       |
| 5-hydroxytryptamine (serotonin) receptor 2A, G             | 5       |
| absent in melanoma 1                                       | 35      |
| serine/arginine repetitive matrix 1                        | 7       |
| solute carrier family 35 (UDP-xylose/UDP-N-ace             | 899     |
| phosphorylase kinase, alpha 1 (muscle)                     | 277     |
| PR domain containing 5                                     | 22      |

|                                                          |       |
|----------------------------------------------------------|-------|
| CREB3 regulatory factor                                  | 24    |
| family with sequence similarity 174, member B            | 16    |
| histone cluster 1, H2bj                                  | 383   |
| ectonucleotide pyrophosphatase/phosphodiesterase         | 5     |
| SH3 and cysteine rich domain                             | 172   |
| UTP14, U3 small nucleolar ribonucleoprotein, h           | 174   |
| engulfment and cell motility 2                           | 22    |
| G protein-coupled receptor 97                            | 8     |
| family with sequence similarity 110, member C            | 29    |
| cancer susceptibility candidate 5                        | 144   |
| immediate early response 5                               | 11212 |
| general transcription factor IIA, 1, 19/37kDa            | 88    |
| regulator of calcineurin 2                               | 32    |
| zinc finger CCCH-type containing 7A                      | 1071  |
| ATPase, Ca <sup>++</sup> transporting, plasma membrane 3 | 5     |
| glutamate dehydrogenase 2                                | 22    |
| TAF12 RNA polymerase II, TATA box binding prot           | 183   |
| SFT2 domain containing 2                                 | 97    |
| BRO1 domain and CAAX motif containing                    | 149   |
| sialic acid binding Ig-like lectin 14                    | 5     |
| dual serine/threonine and tyrosine protein kin           | 256   |
| sorting nexin 29                                         | 266   |
| piggyBac transposable element derived 4                  | 136   |
| basonuclin 1                                             | 6     |
| zinc finger protein 80                                   | 5     |
| 2'-5'-oligoadenylate synthetase 2, 69/71kDa              | 5     |
| pleckstrin homology domain containing, family            | 1172  |
| NUAK family, SNF1-like kinase, 1                         | 489   |
| polymerase (RNA) III (DNA directed) polypeptid           | 96    |
| unc-13 homolog A (C. elegans)                            | 5     |
| Clq and tumor necrosis factor related protein            | 5     |
| chromosome 9 open reading frame 62                       | 5     |
| matrix-remodelling associated 5                          | 5     |
| hepatic leukemia factor                                  | 15    |
| tripartite motif containing 32                           | 285   |
| twist basic helix-loop-helix transcription fac           | 190   |
| spondin 2, extracellular matrix protein                  | 1611  |
| casein kinase 1, gamma 1                                 | 149   |
| diacylglycerol kinase, alpha 80kDa                       | 186   |
| progesterone and adiponectin receptor family member VI   | 106   |
| tuftelin 1                                               | 599   |
| torsin A interacting protein 1                           | 3069  |
| Folliculin-interacting protein 1                         | 38    |
| EFR3 homolog A (S. cerevisiae)                           | 372   |
| zinc finger protein 584                                  | 282   |
| karyopherin alpha 6 (importin alpha 7)                   | 272   |
| trans-golgi network protein 2                            | 1914  |
| centrosomal protein 97kDa                                | 290   |
| SEC31 homolog B (S. cerevisiae)                          | 43    |
| adaptor-related protein complex 1, mu 2 subunit          | 26    |
| SMYD family member 5                                     | 344   |
| transmembrane protein 105                                | 5     |
| DDB1 and CUL4 associated factor 10                       | 433   |
| neurogenin 3                                             | 5     |



|                                                |      |
|------------------------------------------------|------|
| vasoactive intestinal peptide                  | 5    |
| septin 9                                       | 7738 |
| paternally expressed 3                         | 5    |
| potassium large conductance calcium-activated  | 5    |
| RAR-related orphan receptor B                  | 5    |
| tumor necrosis factor (ligand) superfamily, me | 5    |
| solute carrier family 35 (GDP-fucose transport | 910  |
| annexin A4                                     | 2119 |
| LIM homeobox 4                                 | 13   |
| small nuclear RNA activating complex, polypept | 2406 |
| S-phase response (cyclin related)              | 202  |
| Uncharacterized protein                        | 7    |
| cysteine-rich secretory protein LCCL domain co | 397  |
| FEZ family zinc finger 2                       | 5    |
| FCF1 rRNA-processing protein                   | 119  |
| TAF5-like RNA polymerase II, p300/CBP-associa  | 5    |
| discoidin domain receptor tyrosine kinase 1    | 195  |
| microtubule-associated protein 7               | 444  |
| gap junction protein, alpha 9, 59kDa           | 85   |
| SEC16 homolog A ( <i>S. cerevisiae</i> )       | 814  |
| neuropilin (NRP) and tolloid (TLL)-like 1      | 5    |
| RAB22A, member RAS oncogene family             | 484  |
| enolase-phosphatase 1                          | 615  |
| leishmanolysin-like (metallopeptidase M8 famil | 18   |
| zinc finger protein 740                        | 2137 |
| allograft inflammatory factor 1-like           | 487  |
| tubulin folding cofactor E-like                | 89   |
| serine/arginine-rich splicing factor 6         | 1914 |
| von Willebrand factor C domain containing 2    | 5    |
| alpha-2-glycoprotein 1, zinc-binding           | 11   |
| family with sequence similarity 27, member E1  | 5    |
| PAX interacting (with transcription-activation | 19   |
| ring finger protein 26                         | 1208 |
| XK, Kell blood group complex subunit-related f | 7    |
| Uncharacterized protein                        | 5    |
| mitochondrial calcium uptake family, member 3  | 9    |
| SAM domain and HD domain 1                     | 448  |
| tubulin, beta 6 class V                        | 5820 |
| latrophilin 2                                  | 407  |
| EGF containing fibulin-like extracellular matr | 992  |
| Fli-1 proto-oncogene, ETS transcription factor | 116  |
| epithelial mitogen                             | 26   |
| myeloid cell leukemia sequence 1 (BCL2-related | 374  |
| potassium inwardly-rectifying channel, subfami | 9    |
| CWC25 spliceosome-associated protein homolog ( | 300  |
| DDB1 and CUL4 associated factor 4-like 1       | 5    |
| zinc finger protein 878                        | 17   |
| interferon regulatory factor 2 binding protein | 2145 |
| peptidase inhibitor 15                         | 12   |
| RUN and FYVE domain containing 1               | 187  |
| pleckstrin homology domain containing, family  | 125  |
| DEAD/H (Asp-Glu-Ala-Asp/His) box polypeptide 2 | 289  |
| sarcalumenin                                   | 5    |
| SLX4 interacting protein                       | 0    |

|                                                             |      |
|-------------------------------------------------------------|------|
| lysyl oxidase-like 3                                        | 235  |
| D-dopachrome tautomerase-like                               | 7    |
| microcephalin 1                                             | 167  |
| phosphatidylinositol glycan anchor biosynthesi              | 1071 |
| NIPA-like domain containing 3                               | 775  |
| VMA21 vacuolar H <sup>+</sup> -ATPase homolog (S. cerevisia | 2162 |
| cell death-inducing p53 target 1                            | 1857 |
| leucine-rich repeats and calponin homology (CH              | 381  |
| membrane protein, palmitoylated 2 (MAGUK p55 s              | 78   |
| glucosamine-phosphate N-acetyltransferase 1                 | 429  |
| OTU domain containing 5                                     | 957  |
| sprouty-related, EVH1 domain containing 1                   | 547  |
| adaptor-related protein complex 3, beta 1 subu              | 180  |
| solute carrier family 7 (anionic amino acid tr              | 61   |
| T-cell leukemia translocation altered                       | 204  |
| Uncharacterized protein                                     | 5    |
| interleukin 1 receptor accessory protein                    | 313  |
| Uncharacterized protein                                     | 5    |
| ubiquitin-conjugating enzyme E2, J2                         | 3002 |
| eyes absent homolog 3 (Drosophila)                          | 50   |
| leukocyte immunoglobulin-like receptor, subfam              | 5    |
| LIM domain binding 1                                        | 61   |
| 3' (2'), 5'-bisphosphate nucleotidase 1                     | 201  |
| nuclear factor, erythroid 2-like 3                          | 36   |
| CUGBP, Elav-like family member 1                            | 153  |
| signal recognition particle receptor (docking               | 2980 |
| glucosamine-6-phosphate deaminase 1                         | 1130 |
| transcription factor 12                                     | 101  |
| biogenesis of lysosomal organelles complex-1,               | 182  |
| adherens junctions associated protein 1                     | 5    |
| kinesin family member 4B                                    | 5    |
| mex-3 RNA binding family member C                           | 5    |
| BCL2-like 1                                                 | 7726 |
| teneurin transmembrane protein 1                            | 5    |
| mitogen-activated protein kinase kinase 1                   | 8    |
| family with sequence similarity 27, member E2               | 5    |
| archaelysin family metallopeptidase 1                       | 5    |
| glycerol kinase                                             | 38   |
| CTD (carboxy-terminal domain, RNA polymerase I              | 1299 |
| transmembrane protein 231                                   | 243  |
| polymerase (DNA directed), theta                            | 51   |
| ninein (GSK3B interacting protein)                          | 594  |
| TSPY-like 5                                                 | 20   |
| zinc finger CCCH-type containing 6                          | 10   |
| coiled-coil domain containing 180                           | 10   |
| family with sequence similarity 167, member A               | 85   |
| A kinase (PRKA) anchor protein 17A                          | 5    |
| Rho GTPase activating protein 22                            | 10   |
| fibroblast growth factor 5                                  | 1478 |
| NEDD4 binding protein 2-like 2                              | 74   |
| phosphodiesterase 5A, cGMP-specific                         | 69   |
| sema domain, immunoglobulin domain (Ig), trans              | 32   |
| adaptor protein, phosphotyrosine interaction,               | 908  |
| inhibin, beta C                                             | 5    |

|                                                |       |
|------------------------------------------------|-------|
| zinc finger protein 202                        | 704   |
| prostaglandin F2 receptor inhibitor            | 591   |
| glutaminase                                    | 1927  |
| monooxygenase, DBH-like 1                      | 168   |
| cadherin 6, type 2, K-cadherin (fetal kidney)  | 213   |
| tetratricopeptide repeat domain 9              | 39    |
| synaptotagmin I                                | 13    |
| wingless-type MMTV integration site family, me | 5     |
| neuroblastoma breakpoint family, member 3      | 5     |
| proline rich Gla (G-carboxyglutamic acid) 3 (t | 5     |
| Uncharacterized protein; cDNA FLJ42623 fis, cl | 5     |
| synaptosomal-associated protein, 25kDa         | 54    |
| myosin VC                                      | 39    |
| ras homolog family member U                    | 3519  |
| proteasomal ATPase-associated factor 1         | 22    |
| carcinoembryonic antigen-related cell adhesion | 925   |
| phosphatase and tensin homolog                 | 118   |
| chromosome 3 open reading frame 72             | 11    |
| latrophilin 3                                  | 93    |
| S100 calcium binding protein Z                 | 20    |
| MEF2 activating motif and SAP domain containin | 100   |
| chromobox homolog 7                            | 5     |
| homeobox D11                                   | 124   |
| zinc finger protein 578                        | 0     |
| zinc finger protein 438                        | 15    |
| solute carrier family 18 (vesicular acetylchol | 5     |
| zinc finger protein 619                        | 17    |
| family with sequence similarity 27, member E3  | 5     |
| prolyl 4-hydroxylase, beta polypeptide         | 17931 |
| serine/threonine kinase 4                      | 276   |
| FRAS1 related extracellular matrix protein 2   | 33    |
| cyclin T1                                      | 86    |
| protein phosphatase 1, regulatory subunit 10   | 893   |
| phytanoyl-CoA 2-hydroxylase interacting protei | 14    |
| dynein, axonemal, heavy chain 10 opposite stra | 89    |
| zinc finger and SCAN domain containing 25      | 230   |
| KDEL (Lys-Asp-Glu-Leu) endoplasmic reticulum p | 5077  |
| CaM kinase-like vesicle-associated             | 47    |
| solute carrier family 6 (neurotransmitter tran | 5     |
| solute carrier family 22 (organic cation/carni | 37    |
| gamma-glutamyltransferase 7                    | 16    |
| Bardet-Biedl syndrome 10                       | 186   |
| adenosine A2a receptor                         | 337   |
| ring finger protein 185                        | 97    |
| transmembrane protease, serine 2               | 11    |
| phytanoyl-CoA 2-hydroxylase interacting protei | 26    |
| stromal interaction molecule 1                 | 1672  |
| histocompatibility (minor) 13                  | 4848  |
| serine incorporator 5                          | 175   |
| bromodomain and WD repeat domain containing 3  | 506   |
| Rieske (Fe-S) domain containing                | 15    |
| death effector domain containing               | 239   |
| KIAA0408                                       | 95    |
| zinc finger protein 662                        | 11    |

|                                                |       |
|------------------------------------------------|-------|
| chromosome 1 open reading frame 85             | 4649  |
| cytoplasmic polyadenylation element binding pr | 472   |
| solute carrier organic anion transporter famil | 19    |
| HID1 domain containing                         | 5     |
| trimethyllysine hydroxylase, epsilon           | 5     |
| ARHGAP19-SLIT1 readthrough (NMD candidate)     | 15    |
| 5-hydroxytryptamine (serotonin) receptor 4, G  | 5     |
| NIPA-like domain containing 1                  | 137   |
| solute carrier family 25, member 42            | 1088  |
| zinc finger protein 562                        | 130   |
| tensin 4                                       | 40    |
| heparan sulfate (glucosamine) 3-O-sulfotransfe | 148   |
| synaptotagmin VII                              | 192   |
| zinc finger protein 207                        | 839   |
| family with sequence similarity 64, member A   | 392   |
| insulin receptor                               | 577   |
| apoptotic peptidase activating factor 1        | 23    |
| NHL repeat containing 3                        | 49    |
| chromosome 2 open reading frame 88             | 156   |
| signal recognition particle 19kDa              | 243   |
| ribosomal protein L22                          | 1455  |
| SEH1-like ( <i>S. cerevisiae</i> )             | 632   |
| post-GPI attachment to proteins 1              | 106   |
| transmembrane protein 37                       | 2076  |
| transmembrane protein 43                       | 2575  |
| replication protein A1, 70kDa                  | 2834  |
| hepatoma-derived growth factor                 | 10112 |
| transferrin receptor 2                         | 330   |
| family with sequence similarity 153, member C  | 5     |
| methenyltetrahydrofolate synthetase domain con | 149   |
| metastasis associated in colon cancer 1        | 5     |
| contactin 1                                    | 40    |
| Rho GTPase activating protein 27               | 5     |
| mitogen-activated protein kinase 4             | 77    |
| alkylglycerone phosphate synthase              | 1610  |
| tumor necrosis factor receptor superfamily, me | 39    |
| RNA binding motif, single stranded interacting | 56    |
| zinc finger protein 275                        | 465   |
| tyrosine 3-monooxygenase/tryptophan 5-monooxyg | 184   |
| KIAA0226                                       | 89    |
| CD164 molecule, sialomucin                     | 2038  |
| erythrocyte membrane protein band 4.1 like 5   | 108   |
| zinc finger and BTB domain containing 33       | 65    |
| kinesin light chain 2                          | 11832 |
| trinucleotide repeat containing 6A             | 267   |
| thrombospondin, type I, domain containing 7A   | 5     |
| retina and anterior neural fold homeobox       | 5     |
| sorting nexin 22                               | 5     |
| transient receptor potential cation channel, s | 5     |
| chromosome 20 open reading frame 194           | 1083  |
| angiopoietin 1                                 | 21    |
| syndecan 4                                     | 1252  |
| translation machinery associated 16 homolog (S | 34    |
| DEAD (Asp-Glu-Ala-Asp) box polypeptide 20      | 729   |

|                                                |      |
|------------------------------------------------|------|
| histone cluster 1, H2ak                        | 26   |
| fatty acid desaturase 6                        | 12   |
| CD300 molecule-like family member d            | 5    |
| zinc finger protein 525                        | 30   |
| protocadherin 11 Y-linked                      | 0    |
| abhydrolase domain containing 14B              | 189  |
| Ellis van Creveld syndrome                     | 165  |
| protein tyrosine phosphatase, non-receptor typ | 5    |
| copine V                                       | 13   |
| ubiquitin specific peptidase 35                | 21   |
| ATP-binding cassette, sub-family A (ABC1), mem | 7    |
| keratin 83                                     | 5    |
| inhibitor of growth family, member 4           | 548  |
| tectorin alpha                                 | 19   |
| chromosome 7 open reading frame 65             | 5    |
| small glutamine-rich tetratricopeptide repeat  | 205  |
| chloride channel, voltage-sensitive 2          | 44   |
| transmembrane protein 246                      | 367  |
| regulator of G-protein signaling 17            | 11   |
| leucine rich repeat containing 58              | 940  |
| naked cuticle homolog 1 (Drosophila)           | 26   |
| WD repeat domain 36                            | 282  |
| killer cell lectin-like receptor subfamily C,  | 25   |
| intracisternal A particle-promoted polypeptide | 216  |
| diaphanous-related formin 2                    | 91   |
| golgi-associated, gamma adaptin ear containing | 645  |
| synaptojanin 2 binding protein                 | 329  |
| death domain containing 1                      | 5    |
| calcium and integrin binding family member 2   | 119  |
| C-type lectin domain family 1, member A        | 5    |
| G protein-coupled receptor 114                 | 5    |
| transmembrane protein 214                      | 1344 |
| cholinergic receptor, nicotinic, alpha 4 (neur | 5    |
| activin A receptor type II-like 1              | 68   |
| centromere protein 0                           | 298  |
| echinoderm microtubule associated protein like | 60   |
| ORM1-like 1 (S. cerevisiae)                    | 998  |
| ATM interactor                                 | 129  |
| CCR4-NOT transcription complex, subunit 8      | 319  |
| latent transforming growth factor beta binding | 5324 |
| fms-related tyrosine kinase 1                  | 7    |
| leucine rich repeat transmembrane neuronal 2   | 5    |
| sushi domain containing 5                      | 23   |
| coagulation factor XIII, A1 polypeptide        | 5    |
| Smad nuclear interacting protein 1             | 355  |
| phospholipase B1                               | 5    |
| suppressor of cytokine signaling 3             | 5    |
| zinc finger protein 774                        | 27   |
| nucleoredoxin-like 2                           | 198  |
| Rho/Rac guanine nucleotide exchange factor (GE | 313  |
| signal recognition particle 72kDa              | 185  |
| mannosidase, endo-alpha                        | 41   |
| CREB/ATF bZIP transcription factor             | 1115 |
| phosphatidylinositol glycan anchor biosynthesi | 179  |

|                                                                       |       |
|-----------------------------------------------------------------------|-------|
| guanine nucleotide binding protein (G protein)                        | 513   |
| zinc finger, DHHC-type containing 18                                  | 268   |
| ATPase, Cu <sup>++</sup> transporting, alpha polypeptide              | 141   |
| RAS p21 protein activator 4                                           | 5     |
| Uncharacterized protein                                               | 5     |
| yippee-like 2 (Drosophila)                                            | 62    |
|                                                                       | 75    |
| p21 protein (Cdc42/Rac)-activated kinase 2                            | 145   |
| kallikrein-related peptidase 9                                        | 5     |
| chemokine (C-X-C motif) receptor 5                                    | 5     |
| phorbol-12-myristate-13-acetate-induced protei                        | 12503 |
| ralA binding protein 1                                                | 134   |
| immunoglobulin superfamily, member 3                                  | 141   |
| pentatricopeptide repeat domain 3                                     | 2308  |
| solute carrier family 38, member 1                                    | 1967  |
| GRB2 associated, regulator of MAPK1                                   | 536   |
| zinc finger and BTB domain containing 25                              | 149   |
| kelch-like family member 14                                           | 66    |
| transmembrane and coiled-coil domain family 1                         | 97    |
| sorting nexin 10                                                      | 9     |
| tumor protein p53 inducible nuclear protein 2                         | 12    |
| polymerase (DNA directed), gamma                                      | 16    |
| transcription factor-like 5 (basic helix-loop-                        | 183   |
| solute carrier family 34 (type II sodium/phosp                        | 5     |
| FERM and PDZ domain containing 3                                      | 0     |
| Rap guanine nucleotide exchange factor (GEF)-1                        | 20    |
| family with sequence similarity 91, member A1                         | 731   |
| VANGL planar cell polarity protein 2                                  | 560   |
| ectonucleoside triphosphate diphosphohydrolase                        | 15    |
| nucleoporin 155kDa                                                    | 814   |
| ring finger protein 157                                               | 163   |
| protein phosphatase, Mg <sup>2+</sup> /Mn <sup>2+</sup> dependent, 1A | 412   |
| fibroblast growth factor 11                                           | 10    |
| dual specificity phosphatase 16                                       | 444   |
| autophagy related 5                                                   | 1078  |
| NK6 homeobox 1                                                        | 9     |
| TBC/LysM-associated domain containing 2                               | 5     |
| spla/ryanodine receptor domain and SOCS box co                        | 827   |
| major histocompatibility complex, class I, E                          | 1858  |
| aryl hydrocarbon receptor interacting protein-                        | 5     |
| LIM homeobox 9                                                        | 40    |
| ubiquitin specific peptidase 26                                       | 5     |
| Kruppel-like factor 6                                                 | 4644  |
| cytohesin 1                                                           | 553   |
| ring finger protein 208                                               | 30    |
| tropomodulin 2 (neuronal)                                             | 117   |
| integrin, beta 8                                                      | 17    |
| deoxycytidine kinase                                                  | 200   |
| cylindromatosis (turban tumor syndrome)                               | 696   |
| protein tyrosine phosphatase-like A domain con                        | 17    |
| DNA cross-link repair 1B                                              | 687   |
| NAD kinase 2, mitochondrial                                           | 1039  |
| zinc finger protein 703                                               | 1557  |
| sterile alpha motif domain containing 4A                              | 449   |

|                                                            |      |
|------------------------------------------------------------|------|
| neuroblastoma breakpoint family, member 10                 | 5    |
| transmembrane protein 236                                  | 5    |
| ATPase, Ca <sup>++</sup> transporting, cardiac muscle, fas | 12   |
| Uncharacterized protein; cDNA FLJ52611                     | 5    |
| solute carrier family 5 (sodium/monocarboxylat             | 8    |
| U2AF homology motif (UHM) kinase 1                         | 48   |
| Rho guanine nucleotide exchange factor (GEF) 4             | 189  |
|                                                            | 5    |
| enhancer of zeste homolog 1 (Drosophila)                   | 70   |
| glutathione peroxidase 8 (putative)                        | 2107 |
| NCK-associated protein 5                                   | 51   |
| family with sequence similarity 222, member A              | 23   |
| phosphatidylinositol glycan anchor biosynthesi             | 211  |
| N-acylsphingosine amidohydrolase (acid ceramid             | 445  |
| interferon regulatory factor 2 binding protein             | 8690 |
| Yipl domain family, member 3                               | 616  |
| Ras association (RalGDS/AF-6) domain family me             | 461  |
| signal peptide peptidase like 3                            | 799  |
| GIPC PDZ domain containing family, member 2                | 16   |
| phosphodiesterase 1B, calmodulin-dependent                 | 6    |
| potassium voltage-gated channel, shaker-relate             | 5    |
| cholinergic receptor, nicotinic, alpha 10 (neu             | 5    |
| transcriptional regulating factor 1                        | 52   |
| filamin binding LIM protein 1                              | 581  |
| sperm antigen with calponin homology and coile             | 3720 |
| fermitin family member 1                                   | 245  |
| Uncharacterized protein                                    | 5    |
| chemokine (C-X-C motif) receptor 2                         | 5    |
| NADPH oxidase, EF-hand calcium binding domain              | 5    |
| family with sequence similarity 110, member D              | 5    |
| claudin 18                                                 | 5    |
| far upstream element (FUSE) binding protein 1              | 2021 |
| carbohydrate (N-acetylglucosamine 6-0) sulfotr             | 406  |
| stonin 2                                                   | 40   |
| EPH receptor A7                                            | 213  |
| adenylate cyclase 7                                        | 238  |
| N-deacetylase/N-sulfotransferase (heparan gluc             | 12   |
| synaptotagmin XIII                                         | 5    |
| zinc finger and SCAN domain containing 22                  | 45   |
| chromosome 14 open reading frame 180                       | 5    |
| G protein regulated inducer of neurite outgrow             | 5    |
| zinc finger CCCH-type containing 11A                       | 71   |
| leukocyte immunoglobulin-like receptor, subfam             | 5    |
| sterile alpha motif domain containing 4B                   | 46   |
| ring finger protein 38                                     | 348  |
| hormonally up-regulated Neu-associated kinase              | 85   |
| potassium channel tetramerization domain conta             | 3328 |
| plexin domain containing 2                                 | 506  |
| sushi-repeat containing protein, X-linked 2                | 69   |
| CTD (carboxy-terminal domain, RNA polymerase I             | 372  |
| thyroid hormone receptor interactor 12                     | 145  |
| protein tyrosine phosphatase, non-receptor typ             | 104  |
| zinc metallopeptidase STE24                                | 513  |
| RAB3A interacting protein (rabin3)-like 1                  | 157  |

|                                                |      |
|------------------------------------------------|------|
| pleckstrin and Sec7 domain containing 3        | 133  |
| kinesin family member 21A                      | 37   |
| serpin peptidase inhibitor, clade B (ovalbumin | 154  |
| xylosyltransferase I                           | 159  |
| fucosyltransferase 9 (alpha (1,3) fucosyltrans | 5    |
| iodotyrosine deiodinase                        | 5    |
| sideroflexin 3                                 | 154  |
| keratin 74                                     | 5    |
| POU class 4 homeobox 2                         | 5    |
| Ras protein-specific guanine nucleotide-releas | 140  |
| chromosome 5 open reading frame 42             | 45   |
| protein phosphatase 2, regulatory subunit B',  | 23   |
| Uncharacterized protein                        | 10   |
| RAB5B, member RAS oncogene family              | 14   |
| mitogen-activated protein kinase 8             | 227  |
| CCR4-NOT transcription complex, subunit 2      | 1189 |
| tripartite motif containing 41                 | 494  |
| interleukin 7 receptor                         | 293  |
| MAK16 homolog (S. cerevisiae)                  | 97   |
| podoplanin                                     | 264  |
| par-3 family cell polarity regulator beta      | 38   |
| polybromo 1                                    | 689  |
| oligodendrocyte transcription factor 1         | 34   |
| calcium channel, voltage-dependent, beta 1 sub | 81   |
| family with sequence similarity 124A           | 5    |
| shisa family member 2                          | 30   |
| cadherin 24, type 2                            | 44   |
| tRNA methyltransferase 10 homolog A (S. cerevi | 89   |
| potassium voltage-gated channel, shaker-relate | 5    |
| T-box 15                                       | 14   |
| suppressor of Ty 5 homolog (S. cerevisiae)     | 390  |
| SIX homeobox 6                                 | 5    |
| chromosome 3 open reading frame 58             | 118  |
| AKT1 substrate 1 (proline-rich)                | 754  |
| BMP2 inducible kinase                          | 164  |
| cytochrome b5 reductase 3                      | 542  |
| trichoplein, keratin filament binding          | 140  |
| centromere protein C                           | 45   |
| OTU domain containing 7B                       | 299  |
| pogo transposable element with KRAB domain     | 377  |
| Uncharacterized protein                        | 145  |
| PHD finger protein 21A                         | 301  |
| arrestin domain containing 3                   | 1313 |
| synaptotagmin V                                | 5    |
| hippocampus abundant transcript-like 1         | 767  |
| histamine receptor H2                          | 5    |
| nitrogen permease regulator-like 3 (S. cerevis | 129  |
| F-box protein 40                               | 5    |
| golgin A8 family, member A                     | 2264 |
| ELKS/RAB6-interacting/CAST family member 2     | 11   |
| serpin peptidase inhibitor, clade F (alpha-2 a | 2334 |
| transmembrane anterior posterior transformatio | 105  |
| insulin-like growth factor 2 receptor          | 46   |
| vinculin                                       | 189  |



|                                                                     |      |
|---------------------------------------------------------------------|------|
| serine/threonine kinase 10                                          | 655  |
| zinc finger protein 398                                             | 305  |
| chromosome 4 open reading frame 33                                  | 18   |
| UBX domain protein 2B                                               | 157  |
| kelch repeat and BTB (POZ) domain containing 1                      | 5    |
| calyntenin 3                                                        | 5    |
| potassium inwardly-rectifying channel, subfamily 1                  | 53   |
| SCY1-like 3 ( <i>S. cerevisiae</i> )                                | 124  |
| FGFR1 oncogene partner                                              | 552  |
| DDB1 and CUL4 associated factor 7                                   | 3289 |
| capping protein (actin filament) muscle Z-line                      | 1159 |
| activin A receptor, type IC                                         | 27   |
| uroplakin 1A                                                        | 5    |
| mitogen-activated protein kinase 13                                 | 499  |
| cyclin I family, member 2                                           | 5    |
| kinesin family member 5A                                            | 5    |
| coiled-coil-helix-coiled-coil-helix domain containing 1             | 1577 |
| matrix metalloproteinase 15 (membrane-inserted)                     | 605  |
| cryptochrome 2 (photolyase-like)                                    | 63   |
| tropomyosin 3                                                       | 669  |
| CCDC169-SOHLH2 readthrough                                          | 15   |
| UBX domain protein 7                                                | 95   |
| solute carrier family 30 (zinc transporter), member 1               | 19   |
| FSHD region gene 1 family, member B                                 | 94   |
| vasohibin 2                                                         | 70   |
| nidogen 2 (osteonidogen)                                            | 4292 |
| BTB and CNC homology 1, basic leucine zipper transcription factor 1 | 273  |
| F-box protein 32                                                    | 500  |
| G protein-coupled receptor 64                                       | 175  |
| sorting nexin 11                                                    | 20   |
| non-POU domain containing, octamer-binding                          | 177  |
| zinc finger protein 549                                             | 7    |
| zinc finger protein 776                                             | 1447 |
| Protein FAM47E                                                      | 503  |
| neuroblastoma breakpoint family, member 9                           | 5    |
| paraneoplastic Ma antigen family-like 1                             | 313  |
| myelin protein zero                                                 | 17   |
| Uncharacterized protein                                             | 5    |
| synaptotagmin XIV                                                   | 16   |
| activating transcription factor 2                                   | 123  |
| heparanase                                                          | 37   |
| dynein, light chain, LC8-type 2                                     | 1162 |
| myosin VA (heavy chain 12, myosin)                                  | 573  |
| ets variant 6                                                       | 44   |
| MDM2 oncogene, E3 ubiquitin protein ligase                          | 455  |
| SRC kinase signaling inhibitor 1                                    | 5    |
| DEAD (Asp-Glu-Ala-Asp) box polypeptide 39B                          | 817  |
| chromosome 9 open reading frame 72                                  | 25   |
| armadillo repeat containing, X-linked 6                             | 5    |
| neuroblastoma breakpoint family, member 16                          | 5    |
| KIAA0087                                                            | 5    |
| chromosome 2 open reading frame 48                                  | 32   |
| neuroblastoma breakpoint family, member 15                          | 5    |
| adaptor-related protein complex 3, beta 2 subunit                   | 15   |

|                                                |      |
|------------------------------------------------|------|
| sorting nexin family member 21                 | 343  |
| delta/notch-like EGF repeat containing         | 143  |
| reticulon 4 interacting protein 1              | 19   |
| RAN binding protein 10                         | 140  |
| family with sequence similarity 124B           | 5    |
| 24-dehydrocholesterol reductase                | 7645 |
| SKI family transcriptional corepressor 1       | 22   |
| thyroid hormone receptor interactor 11         | 13   |
| F-box protein 22                               | 1310 |
| nuclear receptor coactivator 3                 | 282  |
| ring finger protein 4                          | 33   |
| syntaxin 2                                     | 216  |
| unc-5 homolog A (C. elegans)                   | 7    |
| peroxisomal biogenesis factor 5-like           | 5    |
| secretin receptor                              | 7    |
| apelin                                         | 48   |
| glutamate receptor, metabotropic 1             | 5    |
| SEC14-like 3 (S. cerevisiae)                   | 5    |
| transmembrane protein 151B                     | 5    |
| transmembrane protein 143                      | 160  |
| CDK2-associated, cullin domain 1               | 213  |
| ring finger protein 114                        | 1488 |
| tetratricopeptide repeat domain 37             | 296  |
| CAP-GLY domain containing linker protein 1     | 17   |
| ISY1 splicing factor homolog (S. cerevisiae)   | 897  |
| N-ethylmaleimide-sensitive factor              | 86   |
| transmembrane BAX inhibitor motif containing 6 | 4043 |
| adenylate kinase 3                             | 323  |
| bone morphogenetic protein 8a                  | 13   |
| tribbles pseudokinase 1                        | 313  |
| chromosome 22 open reading frame 26            | 5    |
| glypican 6                                     | 410  |
| cysteine-rich, DPF motif domain containing 1   | 169  |
| golgi membrane protein 1                       | 4212 |
| sorting nexin 12                               | 849  |
| synuclein, alpha interacting protein           | 236  |
| aryl-hydrocarbon receptor nuclear translocator | 39   |
| desmocollin 1                                  | 7    |
| RNA binding motif protein 14                   | 3993 |
| eukaryotic translation initiation factor 2B, s | 901  |
| ADAM metallopeptidase with thrombospondin type | 5    |
| spastin                                        | 239  |
| ring finger protein 217                        | 92   |
| RNA binding motif protein 20                   | 7    |
| serine palmitoyltransferase, long chain base s | 95   |
| LIM domain 7                                   | 4663 |
| phosphate cytidyltransferase 1, choline, alp   | 731  |
| testis expressed 15                            | 58   |
| transmembrane protein 38B                      | 755  |
| guanine nucleotide binding protein (G protein) | 565  |
| kinesin family member 26B                      | 25   |
| RAB6A, member RAS oncogene family              | 9    |
| kelch-like family member 6                     | 5    |
| purine-rich element binding protein B          | 497  |

|                                                        |       |
|--------------------------------------------------------|-------|
| LIM homeobox transcription factor 1, beta              | 8     |
| collagen, type IV, alpha 4                             | 133   |
| homeobox containing 1                                  | 27    |
| SET domain, bifurcated 2                               | 70    |
| protein phosphatase 4, regulatory subunit 1-li         | 27    |
| biotinidase                                            | 183   |
| Uncharacterized protein                                | 110   |
| coiled-coil domain containing 89                       | 11    |
| homeobox D4                                            | 214   |
| LIM and SH3 protein 1                                  | 552   |
| low density lipoprotein receptor-related prote         | 270   |
| transducin (beta)-like 2                               | 990   |
| heparan sulfate (glucosamine) 3-O-sulfotransfe         | 5     |
| threonine synthase-like 1 ( <i>S. cerevisiae</i> )     | 140   |
| solute carrier family 6 (neutral amino acid tr         | 5     |
| neurobeachin                                           | 5     |
| gamma-aminobutyric acid (GABA) A receptor, alp         | 55    |
| neuropeptide FF receptor 1                             | 5     |
| phosphoinositide-3-kinase, regulatory subunit          | 1484  |
| synaptotagmin II                                       | 5     |
| ferredoxin-fold anticodon binding domain conta         | 60    |
| fibronectin type III domain containing 3B              | 509   |
| lin-7 homolog A ( <i>C. elegans</i> )                  | 86    |
| calnexin                                               | 17053 |
| ribosomal RNA processing 15 homolog ( <i>S. cerevi</i> | 243   |
| charged multivesicular body protein 1B                 | 3248  |
| contactin associated protein-like 2                    | 29    |
| TMEM256-PLSCR3 readthrough (NMD candidate)             | 976   |
| kin of IRRE like ( <i>Drosophila</i> )                 | 493   |
| vacuolar protein sorting 4 homolog B ( <i>S. cerev</i> | 180   |
| ventral anterior homeobox 1                            | 8     |
| protein arginine methyltransferase 2                   | 584   |
| calmodulin regulated spectrin-associated prote         | 966   |
| Ras association (RalGDS/AF-6) domain family (N         | 147   |
| seizure threshold 2 homolog (mouse)                    | 123   |
| shroom family member 3                                 | 2841  |
| YTH domain family, member 1                            | 748   |
| abhydrolase domain containing 4                        | 102   |
| fibronectin leucine rich transmembrane protein         | 11    |
| tetraspanin 5                                          | 107   |
| dihydrolipoamide branched chain transacylase E         | 117   |
| leucine-rich alpha-2-glycoprotein 1                    | 1511  |
| epithelial splicing regulatory protein 1               | 74    |
| kallikrein-related peptidase 10                        | 5     |
| dymeclin                                               | 547   |
| sideroflexin 1                                         | 1018  |
| calcium binding protein 39-like                        | 12    |
| trinucleotide repeat containing 6C                     | 248   |
| mediator complex subunit 14                            | 1038  |
| G protein-coupled receptor 20                          | 34    |
| T cell receptor associated transmembrane adapt         | 5     |
| zinc finger protein 620                                | 78    |
| zinc fingers and homeoboxes 3                          | 131   |
| zinc finger protein 529                                | 120   |

|                                                |       |
|------------------------------------------------|-------|
| TBC1 domain family, member 20                  | 761   |
| cingulin                                       | 17    |
| nucleoporin 210kDa                             | 246   |
| ribonuclease L (2',5'-oligoadenylate synthe    | 86    |
| tumor necrosis factor receptor superfamily, me | 243   |
| translocase of outer mitochondrial membrane 40 | 13    |
| prohibitin                                     | 759   |
| cytochrome P450, family 2, subfamily W, polype | 5     |
| TIMP metalloproteinase inhibitor 2             | 3147  |
| golgin A7 family, member B                     | 5     |
| somatomedin B and thrombospondin, type 1 domai | 8     |
| runt-related transcription factor 1; transloca | 9     |
| zinc finger protein 586                        | 137   |
| caprin family member 2                         | 17    |
| chromosome 1 open reading frame 226            | 369   |
| zinc finger protein 75a                        | 145   |
| Down syndrome cell adhesion molecule           | 5     |
| zinc finger protein 256                        | 18    |
| ubiquitin-conjugating enzyme E2I               | 291   |
| killer cell lectin-like receptor subfamily C,  | 9     |
| carbamoyl-phosphate synthase 1, mitochondrial  | 11682 |
| ribosomal RNA processing 7 homolog A (S. cerev | 522   |
| UDP-N-acetyl-alpha-D-galactosamine:polypeptide | 49    |
| phosphatidylinositol transfer protein, alpha   | 366   |
| rippy transcriptional repressor 3              | 16    |
| protein phosphatase 1, regulatory subunit 3E   | 77    |
| family with sequence similarity 3, member A    | 260   |
| chromosome 12 open reading frame 60            | 11    |
| protein tyrosine phosphatase, receptor type, G | 696   |
| zinc finger and BTB domain containing 44       | 236   |
| tet methylcytosine dioxygenase 3               | 1437  |
| C-type lectin domain family 2, member D        | 11    |
| gigaxonin                                      | 185   |
| wingless-type MMTV integration site family, me | 40    |
| empty spiracles homeobox 2                     | 54    |
| transmembrane protein 132B                     | 5     |
| heparan sulfate 6-O-sulfotransferase 2         | 4566  |
| PHD finger protein 8                           | 85    |
| family with sequence similarity 153, member A  | 5     |
| PHD finger protein 15                          | 387   |
| RNA binding motif protein 44                   | 5     |
| B-cell CLL/lymphoma 9                          | 70    |
| G protein-coupled receptor, family C, group 5, | 84    |
| short stature homeobox 2                       | 66    |
| oculocerebrorenal syndrome of Lowe             | 818   |
| G protein-coupled receptor 37 like 1           | 5     |
| serine/threonine/tyrosine kinase 1             | 13    |
| forkhead box C1                                | 1301  |
| solute carrier family 16, member 4             | 19    |
| solute carrier family 15 (oligopeptide transpo | 588   |
| zinc finger protein 687                        | 1250  |
| DEAD (Asp-Glu-Ala-Asp) box polypeptide 19B     | 690   |
| LSM12 homolog (S. cerevisiae)                  | 20    |
| thioredoxin-related transmembrane protein 3    | 348   |

|                                                |      |
|------------------------------------------------|------|
| nucleoredoxin                                  | 811  |
| G patch domain containing 8                    | 337  |
| poly(A) binding protein interacting protein 2B | 42   |
| TraB domain containing 2A                      | 94   |
| chloride channel, voltage-sensitive 4          | 182  |
| KIAA1024-like                                  | 5    |
| alcohol dehydrogenase 1B (class I), beta polyp | 5    |
| potassium voltage-gated channel, shaker-relate | 35   |
| aryl hydrocarbon receptor nuclear translocator | 456  |
| anoctamin 3                                    | 5    |
| chemokine (C-C motif) receptor 5 (gene/pseudog | 5    |
| tudor domain containing 1                      | 5    |
| mitochondrial fission factor                   | 129  |
| epilepsy, progressive myoclonus type 2A, Lafor | 197  |
| nuclear factor of activated T-cells, cytoplasm | 105  |
| cyclin-dependent kinase-like 2 (CDC2-related k | 7    |
| arginine vasopressin receptor 1A               | 9    |
| chromosome 11 open reading frame 74            | 57   |
| translocase of inner mitochondrial membrane 13 | 5135 |
| family with sequence similarity 96, member A   | 191  |
| RAB23, member RAS oncogene family              | 32   |
| reticulon 3                                    | 85   |
| tetratricopeptide repeat domain 13             | 3928 |
| ubiquitin protein ligase E3B                   | 916  |
| purinergic receptor P2Y, G-protein coupled, 1  | 58   |
| signal-induced proliferation-associated 1 like | 1578 |
| core-binding factor, runt domain, alpha subuni | 107  |
| tripartite motif containing 71, E3 ubiquitin p | 67   |
| sema domain, immunoglobulin domain (Ig), trans | 30   |
| transmembrane protein 30B                      | 10   |
| RB-associated KRAB zinc finger                 | 99   |
| helicase-like transcription factor             | 127  |
| spermatogenesis associated 13                  | 900  |
| JAZF zinc finger 1                             | 869  |
| APOBEC1 complementation factor                 | 80   |
| RAB15, member RAS oncogene family              | 23   |
| inositol monophosphatase domain containing 1   | 1488 |
| chromosome 2 open reading frame 72             | 3885 |
| leucine-rich repeats and death domain containi | 9    |
| ARP2 actin-related protein 2 homolog (yeast)   | 71   |
| transmembrane protein 19                       | 1378 |
| mucin 1, cell surface associated               | 388  |
| Cdc42 guanine nucleotide exchange factor (GEF) | 13   |
| phosphatase and actin regulator 3              | 84   |
| WD repeat domain 31                            | 23   |
| regulator of G-protein signaling 7 binding pro | 5    |
| butyrophilin, subfamily 3, member A3           | 16   |
| tumor protein p53 regulated apoptosis inducing | 5    |
|                                                | 8    |
| enolase superfamily member 1                   | 95   |
| speckle-type POZ protein-like                  | 216  |
| melanoma cell adhesion molecule                | 398  |
| arsenic (+3 oxidation state) methyltransferase | 379  |
| progesterone receptor                          | 8    |

|                                                            |      |
|------------------------------------------------------------|------|
| chromosome 11 open reading frame 58                        | 1782 |
| zinc finger protein 148                                    | 230  |
| neuronal calcium sensor 1                                  | 1083 |
| sterile alpha motif domain containing 8                    | 100  |
| chromodomain protein, Y-like                               | 24   |
| oxidative stress responsive 1                              | 1790 |
| mediator complex subunit 9                                 | 256  |
| fukutin                                                    | 153  |
| zinc finger, CCHC domain containing 16                     | 5    |
| zinc finger protein 320                                    | 10   |
| sorting nexin 20                                           | 5    |
| TBC1 domain family, member 22B                             | 127  |
| amylo-alpha-1, 6-galactosidase, 4-alpha-galactanot         | 48   |
| inhibitor of kappa light polypeptide gene enhan            | 334  |
| aarF domain containing kinase 2                            | 294  |
| chromosome 21 open reading frame 90                        | 26   |
| USP6 N-terminal like                                       | 183  |
| protein-O-mannosyltransferase 1                            | 2617 |
| CTD (carboxy-terminal domain, RNA polymerase I             | 457  |
| elongation factor RNA polymerase II                        | 250  |
| homeodomain interacting protein kinase 2                   | 48   |
| crumbs homolog 1 (Drosophila)                              | 115  |
| regulatory associated protein of MTOR, complex             | 190  |
| coatamer protein complex, subunit alpha                    | 803  |
| SWAP switching B-cell complex 70kDa subunit                | 492  |
| transmembrane protein 45B                                  | 67   |
| leucine zipper protein 1                                   | 434  |
| sialic acid binding Ig-like lectin 11                      | 5    |
| polymeric immunoglobulin receptor                          | 13   |
| dual oxidase maturation factor 1                           | 5    |
| homeobox C12                                               | 5    |
| hydroxy-delta-5-steroid dehydrogenase, 3 beta-             | 173  |
| regulator of G-protein signaling 16                        | 7    |
| DDHD domain containing 2                                   | 961  |
| PHD finger protein 13                                      | 1207 |
| adrenomedullin 2                                           | 129  |
| caldesmon 1                                                | 1013 |
| frizzled family receptor 2                                 | 807  |
| signal peptide, CUB domain, EGF-like 3                     | 47   |
| ATPase, H <sup>+</sup> transporting, lysosomal 13kDa, V1 s | 8219 |
| chloride channel, voltage-sensitive 5                      | 154  |
| schlafen family member 5                                   | 195  |
| SOGA family member 3                                       | 95   |
| ciliary neurotrophic factor                                | 46   |
| RAB GTPase activating protein 1                            | 514  |
| B-cell CLL/lymphoma 9-like                                 | 91   |
| egl-9 family hypoxia-inducible factor 1                    | 505  |
| VENT homeobox                                              | 5    |
| tumor protein p53 inducible protein 11                     | 90   |
| TAF4b RNA polymerase II, TATA box binding prot             | 52   |
| solute carrier family 39 (zinc transporter), m             | 845  |
| fibroblast growth factor receptor 2                        | 75   |
| stromal antigen 2                                          | 216  |
| chromosome 15 open reading frame 38                        | 325  |

|                                                |      |
|------------------------------------------------|------|
| calcium activated nucleotidase 1               | 538  |
| poly (ADP-ribose) polymerase family, member 14 | 502  |
| cytidine monophosphate (UMP-CMP) kinase 2, mit | 13   |
| Sec6l alpha 2 subunit ( <i>S. cerevisiae</i> ) | 105  |
| osteosarcoma amplified 9, endoplasmic reticulu | 1038 |
| ribosomal protein S6 kinase, 90kDa, polypeptid | 156  |
| centrosomal protein 350kDa                     | 705  |
| SRY (sex determining region Y)-box 5           | 43   |
| KAT8 regulatory NSL complex subunit 1          | 5    |
| G protein-coupled receptor 180                 | 161  |
| alcohol dehydrogenase, iron containing, 1      | 33   |
| EGF-like, fibronectin type III and laminin G d | 123  |
| DEAD/H (Asp-Glu-Ala-Asp/His) box helicase 11   | 175  |
| coronin 6                                      | 48   |
| membrane protein, palmitoylated 6 (MAGUK p55 s | 389  |
| CAP-GLY domain containing linker protein 3     | 9    |
| proprotein convertase subtilisin/kexin type 7  | 92   |
| keratin 38                                     | 5    |
| phospholipase C, delta 1                       | 21   |
| actin binding LIM protein 1                    | 1321 |
| polycystin (PKD) family receptor for egg jelly | 5    |
| paired box 8                                   | 11   |
| RAD54-like 2 ( <i>S. cerevisiae</i> )          | 215  |
| glutamyl-tRNA synthetase 2, mitochondrial      | 394  |
| solute carrier family 7 (amino acid transporte | 155  |
| uncharacterized serine/threonine-protein kinas | 17   |
| family with sequence similarity 134, member C  | 397  |
| zinc finger CCCH-type containing 13            | 229  |
| ADNP homeobox 2                                | 808  |
| zinc finger protein 142                        | 252  |
| lipase, member H                               | 18   |
| OTU domain containing 6B                       | 18   |
| major facilitator superfamily domain containin | 395  |
| tetratricopeptide repeat domain 14             | 99   |
| hexamethylene bis-acetamide inducible 1        | 179  |
| cytochrome c oxidase assembly factor 1 homolog | 244  |
| zinc finger protein 317                        | 433  |
| ADP-ribosylation factor-like 5B                | 368  |
| cell adhesion associated, oncogene regulated   | 173  |
| zinc finger protein 510                        | 40   |
| IKAROS family zinc finger 1 (Ikaros)           | 11   |
| hypoxia inducible factor 1, alpha subunit inhi | 1545 |
| chromosome 17 open reading frame 103           | 54   |
| kinesin family member 21B                      | 12   |
| adrenoceptor beta 3                            | 5    |
| calpain 6                                      | 5    |
| zinc finger protein 621                        | 39   |
| v-myb avian myeloblastosis viral oncogene homo | 53   |
| laminin, beta 4                                | 5    |
| casein kinase 1, gamma 2                       | 5    |
| inhibitor of kappa light polypeptide gene enha | 5    |
| chromosome 18 open reading frame 63            | 5    |
| zinc finger protein 534                        | 5    |
| mitochondrial antiviral signaling protein      | 211  |

|                                                 |       |
|-------------------------------------------------|-------|
| heme binding protein 2                          | 252   |
| ankyrin repeat domain 52                        | 2913  |
| F-box and leucine-rich repeat protein 20        | 455   |
| wings apart-like homolog (Drosophila)           | 185   |
| OTU domain containing 3                         | 438   |
| potassium channel tetramerization domain conta  | 404   |
| solute carrier family 35 (GDP-fucose transport  | 856   |
| chromatin target of PRMT1                       | 2499  |
| UDP glycosyltransferase 3 family, polypeptide   | 90    |
| v-maf avian musculoaponeurotic fibrosarcoma on  | 333   |
| zinc finger protein 501                         | 24    |
| neurolysin (metallopeptidase M3 family)         | 885   |
| sorcin                                          | 278   |
| maestro heat-like repeat family member 6        | 24    |
| Crm, cramped-like (Drosophila)                  | 731   |
| zinc finger protein 678                         | 89    |
| ALG6, alpha-1,3-glycosyltransferase             | 140   |
| coiled-coil domain containing 3                 | 16    |
| zinc finger, FYVE domain containing 1           | 5     |
| CDP-diacylglycerol synthase (phosphatidate cyt  | 720   |
| GATA binding protein 4                          | 5     |
| family with sequence similarity 131, member B   | 5     |
| eukaryotic translation initiation factor 4 gam  | 61971 |
| zinc finger protein 512                         | 189   |
| MAU2 sister chromatid cohesion factor           | 5234  |
| adaptor-related protein complex 5, beta 1 subu  | 22    |
| retinoblastoma-like 1 (p107)                    | 88    |
| ELOVL fatty acid elongase 2                     | 99    |
| cytohesin 3                                     | 248   |
| insulin-like growth factor binding protein 5    | 10709 |
| C2 calcium-dependent domain containing 4B       | 14    |
| chromosome 1 open reading frame 116             | 17    |
| ubiquitin specific peptidase 31                 | 214   |
| KIAA0355                                        | 538   |
| HECT domain containing E3 ubiquitin protein li  | 45    |
| LSM11, U7 small nuclear RNA associated          | 1458  |
| FOS-like antigen 2                              | 2255  |
| solute carrier family 16, member 2 (thyroid ho  | 22    |
| zinc finger protein 268                         | 156   |
| Uncharacterized protein                         | 15    |
| kinesin family member 24                        | 84    |
| kelch-like family member 18                     | 74    |
| RNA binding motif protein 41                    | 41    |
| mediator complex subunit 1                      | 87    |
| ATPase, class VI, type 11A                      | 731   |
| ybeY metallopeptidase (putative)                | 40    |
| peroxidasin homolog (Drosophila)                | 872   |
| translational activator of mitochondrially enc  | 755   |
| mediator complex subunit 22                     | 43    |
| family with sequence similarity 84, member B    | 45    |
| chromosome 1 open reading frame 95              | 28    |
| REST corepressor 1                              | 403   |
| BRI3 binding protein                            | 820   |
| ST6 beta-galactosamide alpha-2,6-sialyltransfer | 549   |



|                                                |      |
|------------------------------------------------|------|
| alanine and arginine rich domain containing pr | 7    |
| AT rich interactive domain 4A (RBP1-like)      | 33   |
| chromosome 17 open reading frame 102           | 5    |
| chromosome 19 open reading frame 54            | 18   |
| chemokine (C-X-C motif) receptor 6             | 5    |
| eukaryotic translation initiation factor 4E fa | 475  |
| testis specific, 10                            | 8    |
| transmembrane protein 108                      | 31   |
| transformation/transcription domain-associated | 351  |
| missing oocyte, meiosis regulator, homolog (Dr | 77   |
| zinc finger protein 611                        | 7    |
| regulating synaptic membrane exocytosis 2      | 8    |
| apolipoprotein O-like                          | 109  |
| RAD9 homolog A (S. pombe)                      | 38   |
| CD22 molecule                                  | 13   |
| ribosomal protein L12                          | 30   |
| zinc finger and BTB domain containing 21       | 802  |
| TAF4 RNA polymerase II, TATA box binding prote | 61   |
| digestive organ expansion factor homolog (zebr | 493  |
| insulin-degrading enzyme                       | 446  |
| Fas (TNFRSF6) associated factor 1              | 428  |
| diablo, IAP-binding mitochondrial protein      | 1700 |
| chromosome 2 open reading frame 54             | 13   |
| zinc finger protein 526                        | 256  |
| erythrocyte membrane protein band 4.2          | 5    |
| solute carrier family 25, member 34            | 5    |
| G patch domain containing 11                   | 113  |
| zinc finger protein 804B                       | 0    |
| chromosome 14 open reading frame 177           | 5    |
| neuroblastoma breakpoint family, member 12     | 5    |
| NYN domain and retroviral integrase containing | 1928 |
| bassoon presynaptic cytomatrix protein         | 31   |
| amine oxidase, copper containing 3             | 59   |
| chromosome 6 open reading frame 141            | 28   |
| GATA zinc finger domain containing 2A          | 986  |
| syntaxin binding protein 4                     | 62   |
| LIM domains containing 1                       | 1092 |
| discs, large (Drosophila) homolog-associated p | 1188 |
| Usher syndrome 2A (autosomal recessive, mild)  | 5    |
| proline rich 20D                               | 5    |
| zinc finger protein 300                        | 107  |
| solute carrier family 6 (amino acid transporte | 5    |
| lymphocyte antigen 6 complex, locus G5B        | 200  |
| proline rich 20A                               | 5    |
| proline rich 20C                               | 5    |
| zyg-11 family member B, cell cycle regulator   | 975  |
| proline rich 20E                               | 5    |
| GRAM domain containing 1C                      | 12   |
| phosphodiesterase 4A, cAMP-specific            | 48   |
| protocadherin 17                               | 477  |
| inducible T-cell co-stimulator                 | 5    |
| proline rich 20B                               | 5    |
| intermediate filament family orphan 2          | 139  |
| PAP associated domain containing 7             | 3195 |

|                                                |      |
|------------------------------------------------|------|
| NEDD4 binding protein 1                        | 105  |
| ubiquitin-like modifier activating enzyme 6    | 169  |
| olfactomedin 4                                 | 5    |
| INO80 complex subunit                          | 279  |
| podocalyxin-like                               | 2928 |
| chromosome 12 open reading frame 66            | 98   |
| tubulin, beta 4A class IVa                     | 8    |
| Lipid phosphate phosphatase-related protein ty | 5    |
| synaptotagmin-like 5                           | 37   |
| androgen receptor                              | 57   |
| neuroblastoma breakpoint family, member 11     | 5    |
| protein tyrosine phosphatase, receptor type, f | 5    |
| tousled-like kinase 1                          | 200  |
| forkhead box K1                                | 368  |
| family with sequence similarity 212, member B  | 211  |
| zinc finger, FYVE domain containing 16         | 388  |
| abhydrolase domain containing 17A              | 202  |
| DnaJ (Hsp40) homolog, subfamily C, member 10   | 709  |
| mediator complex subunit 13-like               | 73   |
| membrane-spanning 4-domains, subfamily A, memb | 5    |
| immunoglobulin superfamily containing leucine- | 6    |
| solute carrier family 4 (sodium bicarbonate co | 6    |
| family with sequence similarity 216, member B  | 5    |
| arachidonate lipoxygenase 3                    | 5    |
| alpha-kinase 3                                 | 16   |
| myocyte enhancer factor 2A                     | 654  |
| transmembrane protein 245                      | 1320 |
| coagulation factor IX                          | 5    |
| ataxin 7-like 3                                | 43   |
| lipocalin 10                                   | 10   |
| saccharopine dehydrogenase (putative)          | 1752 |
| family with sequence similarity 199, X-linked  | 856  |
| Src homology 2 domain containing E             | 9    |
| vitamin K epoxide reductase complex, subunit 1 | 2291 |
| SERTA domain containing 1                      | 603  |
| phosphofurin acidic cluster sorting protein 1  | 87   |
| distal-less homeobox 2                         | 653  |
| tumor necrosis factor (ligand) superfamily, me | 29   |
| cholinergic receptor, nicotinic, beta 4 (neuro | 5    |
| KIAA0247                                       | 161  |
| endothelin receptor type B                     | 5    |
| neuroblastoma breakpoint family, member 1      | 21   |
| serine active site containing 1                | 129  |
| solute carrier family 9, subfamily A (NHE7, ca | 147  |
| mannosyl (alpha-1,3-)-glycoprotein beta-1,4-N- | 223  |
| aldehyde dehydrogenase 3 family, member A2     | 940  |
| DET1 and DDB1 associated 1                     | 76   |
| guanylate cyclase 1, soluble, alpha 2          | 24   |
| solute carrier family 7, member 6 opposite str | 751  |
| family with sequence similarity 129, member A  | 213  |
| chromosome 22 open reading frame 39            | 360  |
| KH-type splicing regulatory protein            | 4469 |
| dopachrome tautomerase                         | 5    |
| tenascin XB                                    | 5    |

|                                                |      |
|------------------------------------------------|------|
| RNA binding motif protein 48                   | 220  |
| mesenchyme homeobox 1                          | 5    |
| dpy-19-like 1 ( <i>C. elegans</i> )            | 80   |
| phosphatidylinositol glycan anchor biosynthesi | 1203 |
| leucine rich repeat containing 3               | 176  |
| family with sequence similarity 169, member A  | 90   |
| zinc finger protein 35                         | 71   |
| chromosome 19 open reading frame 25            | 498  |
| dimethylglycine dehydrogenase                  | 17   |
| cleavage stimulation factor, 3' pre-RNA, subun | 658  |
| TIMP metalloproteinase inhibitor 4             | 38   |
| RNA guanylyltransferase and 5'-phosphatase     | 1384 |
| cell division cycle 25C                        | 125  |
| protocadherin gamma subfamily A, 11            | 145  |
| protocadherin gamma subfamily B, 6             | 145  |
| retinoid X receptor, beta                      | 46   |
| protein tyrosine phosphatase, receptor type, S | 322  |
| KAT8 regulatory NSL complex subunit 1-like     | 5    |
| HCG1811579; Uncharacterized protein            | 25   |
| protocadherin gamma subfamily B, 7             | 145  |
| protocadherin gamma subfamily A, 4             | 145  |
| zona pellucida-like domain containing 1        | 5    |
| pim-2 oncogene                                 | 77   |
| hydroxycarboxylic acid receptor 2              | 5    |
| tau tubulin kinase 2                           | 18   |
| cancer susceptibility candidate 3              | 493  |
| protocadherin gamma subfamily B, 2             | 145  |
| interleukin 17D                                | 130  |
| solute carrier organic anion transporter famil | 5    |
| glycerophosphodiester phosphodiesterase domain | 8    |
| CAP-GLY domain containing linker protein 2     | 2111 |
| protocadherin gamma subfamily A, 1             | 145  |
| protocadherin gamma subfamily B, 3             | 145  |
| mediator complex subunit 13                    | 561  |
| protocadherin gamma subfamily B, 4             | 145  |
| protocadherin gamma subfamily A, 5             | 145  |
| protocadherin gamma subfamily B, 1             | 145  |
| toll interacting protein                       | 1536 |
| mannan-binding lectin serine peptidase 1 (C4/C | 838  |
| mediator complex subunit 20                    | 32   |
| PCF11 cleavage and polyadenylation factor subu | 218  |
| F-box protein 42                               | 854  |
| Uncharacterized protein                        | 32   |
| cyclin-dependent kinase 5, regulatory subunit  | 335  |
| SKI-like oncogene                              | 210  |
| solute carrier family 8 (sodium/calcium exchan | 61   |
| peroxisome proliferator-activated receptor gam | 12   |
| lysine (K)-specific methyltransferase 2A       | 1092 |
| neurofibromin 2 (merlin)                       | 828  |
| protocadherin gamma subfamily A, 3             | 145  |
| TNF receptor-associated factor 1               | 5    |
| protocadherin gamma subfamily C, 3             | 145  |
|                                                | 164  |
| protocadherin gamma subfamily A, 12            | 145  |

|                                                |      |
|------------------------------------------------|------|
| protocadherin gamma subfamily A, 6             | 145  |
| Ras and Rab interactor 2                       | 539  |
| platelet-derived growth factor receptor, alpha | 39   |
| cyclic nucleotide gated channel beta 3         | 5    |
| coiled-coil domain containing 85A              | 46   |
| metastasis associated 1 family, member 2       | 1168 |
| multivesicular body subunit 12B                | 29   |
| ubiquitin protein ligase E3C                   | 1332 |
| protocadherin gamma subfamily A, 9             | 145  |
| poly (ADP-ribose) polymerase family, member 16 | 97   |
| protocadherin gamma subfamily A, 7             | 145  |
| protocadherin gamma subfamily A, 2             | 145  |
| transcriptional adaptor 3                      | 135  |
| protocadherin gamma subfamily A, 8             | 145  |
| leucine-rich repeat LGI family, member 3       | 5    |
| protein associated with topoisomerase II homol | 703  |
| solute carrier family 35 (UDP-N-acetylglucosam | 191  |
| dipeptidyl-peptidase 8                         | 1293 |
| Cbl proto-oncogene B, E3 ubiquitin protein lig | 469  |
| signal peptide, CUB domain, EGF-like 2         | 57   |
| GINS complex subunit 4 (Sld5 homolog)          | 500  |
| tetratricopeptide repeat domain 9C             | 475  |
| major histocompatibility complex, class II, DO | 5    |
| spla/ryanodine receptor domain and SOCS box co | 572  |
| RNA binding motif protein 23                   | 1540 |
| endosulfine alpha                              | 167  |
| protein phosphatase 1, regulatory subunit 7    | 119  |
| T-cell leukemia homeobox 2                     | 5    |
| protocadherin gamma subfamily A, 10            | 145  |
| Ral GEF with PH domain and SH3 binding motif 2 | 201  |
| microfibrillar-associated protein 2            | 10   |
| junctophilin 3                                 | 318  |
| retrotransposon gag domain containing 4        | 34   |
| protocadherin gamma subfamily C, 4             | 145  |
| protocadherin gamma subfamily C, 5             | 145  |
| ectonucleoside triphosphate diphosphohydrolase | 5    |
| coxsackie virus and adenovirus receptor        | 56   |
| F-box and WD repeat domain containing 8        | 169  |
| striatin interacting protein 1                 | 114  |
| dynactin 5 (p25)                               | 764  |
| sal-like 4 (Drosophila)                        | 155  |
|                                                | 5    |
| major histocompatibility complex, class II, DP | 5    |
| chromosome 9 open reading frame 66             | 13   |
| taxilin alpha                                  | 564  |
| endonuclease domain containing 1               | 100  |
| dual specificity phosphatase 2                 | 41   |
| actin filament associated protein 1-like 1     | 10   |
| calmin (calponin-like, transmembrane)          | 53   |
| methylmalonic aciduria (cobalamin deficiency)  | 38   |
| AF4/FMR2 family, member 2                      | 8    |
| vesicle transport through interaction with t-S | 376  |
| calcium binding and coiled-coil domain 2       | 1160 |
| chromodomain helicase DNA binding protein 4    | 145  |

|                                                   |       |
|---------------------------------------------------|-------|
| YKT6 v-SNARE homolog ( <i>S. cerevisiae</i> )     | 2409  |
| hydroxycarboxylic acid receptor 3                 | 5     |
| tumor suppressor candidate 5                      | 5     |
| cell division cycle associated 7-like             | 292   |
| solute carrier family 26 (anion exchanger), me    | 18    |
| anoctamin 1, calcium activated chloride channe    | 78    |
| interferon, epsilon                               | 65    |
| ribosomal protein S17-like                        | 5     |
| ribosomal protein S17                             | 5     |
| golgi-associated, gamma adaptin ear containing    | 325   |
| SRR1 domain containing                            | 1069  |
| dihydropyrimidinase-like 3                        | 5209  |
| anthrax toxin receptor 2                          | 51    |
| zinc finger protein 28                            | 9     |
| ZFP37 zinc finger protein                         | 24    |
| discs, large homolog 3 ( <i>Drosophila</i> )      | 185   |
| T-box 18                                          | 54    |
| cytochrome c oxidase subunit VIb polypeptide 1    | 1779  |
| SLIT-ROBO Rho GTPase activating protein 1         | 64    |
| fibulin 5                                         | 146   |
| zinc finger, MYM-type 2                           | 172   |
| pentatricopeptide repeat domain 2                 | 377   |
| shroom family member 4                            | 5     |
| aquaporin 7                                       | 10    |
| synaptic vesicle glycoprotein 2B                  | 7     |
| APH1A gamma secretase subunit                     | 475   |
| elongation factor Tu GTP binding domain contai    | 3704  |
| alkaline ceramidase 1                             | 5     |
| unc-80 homolog ( <i>C. elegans</i> )              | 5     |
| biphenyl hydrolase-like (serine hydrolase)        | 618   |
| zinc finger protein 467                           | 11    |
| TNFRSF1A-associated via death domain              | 117   |
| armadillo repeat containing 5                     | 376   |
| proline/arginine-rich end leucine-rich repeat     | 5     |
| adaptor-related protein complex 2, mu 1 subuni    | 10753 |
| troponin I type 1 (skeletal, slow)                | 5     |
| uveal autoantigen with coiled-coil domains and    | 82    |
| ectonucleoside triphosphate diphosphohydrolase    | 105   |
| drebrin-like                                      | 1802  |
| septin 11                                         | 515   |
| small integral membrane protein 13                | 199   |
| family with sequence similarity 111, member B     | 39    |
| chemokine (C-X3-C motif) ligand 1                 | 218   |
| protein phosphatase 3, regulatory subunit B, a    | 117   |
| interleukin-1 receptor-associated kinase 1 bin    | 30    |
| kelch-like family member 7                        | 90    |
| suppressor of fused homolog ( <i>Drosophila</i> ) | 247   |
| carboxylesterase 2                                | 24    |
| GEN1 Holliday junction 5' flap endonuclease       | 161   |
| vesicle-associated membrane protein 7             | 5     |
| importin 9                                        | 3549  |
| CCR4-NOT transcription complex, subunit 6         | 300   |
| integrin, alpha 9                                 | 9     |
| dishevelled associated activator of morphogene    | 5     |

|                                                |      |
|------------------------------------------------|------|
| nuclear mitotic apparatus protein 1            | 7    |
| pipecolic acid oxidase                         | 30   |
| serine/arginine repetitive matrix 4            | 22   |
| H2A histone family, member V                   | 9640 |
| hexose-6-phosphate dehydrogenase (glucose 1-de | 467  |
| DEAD (Asp-Glu-Ala-Asp) box polypeptide 18      | 141  |
| chromosome 17 open reading frame 72            | 5    |
| tetratricopeptide repeat domain 39A            | 174  |
| SET binding protein 1                          | 77   |
| Yipl domain family, member 4                   | 3482 |
| KIAA1958                                       | 117  |
| LON peptidase N-terminal domain and ring finge | 36   |
| nucleolar protein 12                           | 536  |
| family with sequence similarity 196, member B  | 174  |
| GTPase activating protein (SH3 domain) binding | 688  |
| collagen, type IX, alpha 2                     | 189  |
| protein kinase, cGMP-dependent, type I         | 12   |
| myocardin                                      | 62   |
| zinc finger protein 609                        | 103  |
| seizure related 6 homolog (mouse)-like         | 5    |
| cullin-associated and neddylation-dissociated  | 92   |
| Uncharacterized protein; cDNA FLJ45856 fis, cl | 7    |
| geranylgeranyl diphosphate synthase 1          | 184  |
| gamma-aminobutyric acid (GABA) A receptor, eps | 6    |
| cAMP-regulated phosphoprotein, 19kDa           | 1316 |
| transportin 2                                  | 1620 |
| ring finger protein 115                        | 757  |
| transforming growth factor beta regulator 1    | 275  |
| pleckstrin homology-like domain, family B, mem | 126  |
| poly (ADP-ribose) polymerase family, member 8  | 80   |
| prickle homolog 1 (Drosophila)                 | 146  |
| chloride channel CLIC-like 1                   | 849  |
| neuron navigator 2                             | 337  |
| v-rel avian reticuloendotheliosis viral oncoge | 1707 |
| centlein, centrosomal protein                  | 42   |
| NDC1 transmembrane nucleoporin                 | 371  |
| zinc finger homeobox 3                         | 57   |
| NLR family, pyrin domain containing 10         | 21   |
| proline and serine-rich protein 2              | 61   |
| chromosome 14 open reading frame 119           | 6513 |
| transmembrane and tetratricopeptide repeat con | 406  |
| methyltransferase like 20                      | 47   |
| wingless-type MMTV integration site family mem | 5    |
| leucine rich repeat containing 38              | 5    |
| anoctamin 5                                    | 12   |
| transmembrane protein 86A                      | 5    |
| BCL2 binding component 3                       | 87   |
| metallothionein 1A                             | 19   |
| serine/arginine-rich splicing factor 10        | 1920 |
| p53 and DNA-damage regulated 1                 | 116  |
| zinc finger, DHHC-type containing 20           | 1486 |
| formin-like 3                                  | 132  |
| lectin, galactoside-binding, soluble, 3 bindin | 238  |
| Sp2 transcription factor                       | 779  |

|                                                |      |
|------------------------------------------------|------|
| ATP-binding cassette, sub-family F (GCN20), me | 48   |
| dynamin 1-like                                 | 399  |
| protein kinase D3                              | 203  |
| ring finger protein 40, E3 ubiquitin protein 1 | 773  |
| RPGRIP1-like                                   | 55   |
| histone deacetylase 4                          | 48   |
| chromosome 11 open reading frame 48            | 29   |
| kinesin family member 5C                       | 19   |
| short stature homeobox                         | 5    |
| CMT1A duplicated region transcript 4           | 109  |
| eukaryotic translation initiation factor 4B    | 37   |
| methyl-CpG binding domain protein 3            | 393  |
| transcription factor 4                         | 394  |
| BCL2-associated transcription factor 1         | 1732 |
| vacuolar protein sorting 53 homolog (S. cerevi | 1332 |
| pre-B-cell leukemia homeobox 1                 | 18   |
| glutamate-rich WD repeat containing 1          | 2673 |
| Bet1 golgi vesicular membrane trafficking prot | 702  |
| Zinc finger protein 268                        | 156  |
| peroxisomal biogenesis factor 26               | 157  |
| transmembrane protein 65                       | 769  |
| queuine tRNA-ribosyltransferase domain contain | 123  |
| torsin family 1, member B (torsin B)           | 222  |
| Mab-21 domain containing 2                     | 48   |
| EGF domain-specific O-linked N-acetylglucosami | 302  |
| protein tyrosine kinase 6                      | 27   |
| suppressor of cancer cell invasion             | 74   |
| ring finger protein 220                        | 474  |
| PR domain containing 15                        | 328  |
| hedgehog acyltransferase                       | 583  |
| adenosine deaminase, tRNA-specific 2           | 303  |
| zinc finger and BTB domain containing 39       | 7    |
| spermatogenesis associated 18                  | 19   |
| KIAA1257                                       | 5    |
| zinc finger and BTB domain containing 43       | 396  |
| lysine (K)-specific demethylase 8              | 62   |
| transient receptor potential cation channel, s | 21   |
| CUB domain containing protein 2                | 5    |
| pleckstrin homology domain containing, family  | 45   |
| phosphatidylinositol glycan anchor biosynthesi | 152  |
| F-box protein 48                               | 13   |
| GATA zinc finger domain containing 2B          | 48   |
| neuregulin 2                                   | 9    |
| family with sequence similarity 102, member A  | 85   |
| utrophin                                       | 87   |
| BTB (POZ) domain containing 7                  | 590  |
| zinc finger, DHHC-type containing 3            | 426  |
| homeobox A13                                   | 328  |
| growth factor receptor-bound protein 10        | 1382 |
| sorting nexin 8                                | 303  |
| CD28 molecule                                  | 5    |
| proteasome (prosome, macropain) assembly chape | 31   |
| deltex 3-like (Drosophila)                     | 319  |
| fidgetin                                       | 10   |

|                                                        |      |
|--------------------------------------------------------|------|
| nucleoporin 35kDa                                      | 210  |
| serine incorporator 2                                  | 624  |
| baculoviral IAP repeat containing 3                    | 9    |
| sema domain, transmembrane domain (TM), and cy         | 179  |
| solute carrier family 34 (type II sodium/phosp         | 5    |
| chromosome 10 open reading frame 105                   | 5    |
| KIAA1045                                               | 42   |
| single-strand-selective monofunctional uracil-         | 242  |
| PAN3 poly(A) specific ribonuclease subunit hom         | 361  |
| developmental pluripotency associated 3                | 11   |
| nuclear export mediator factor                         | 18   |
| zinc finger, DHHC-type containing 2                    | 171  |
| zinc finger and BTB domain containing 8B               | 18   |
| zinc finger protein 451                                | 190  |
| coiled-coil domain containing 80                       | 570  |
| forkhead box B1                                        | 31   |
| ADAM metallopeptidase with thrombospondin type         | 68   |
| adenosylmethionine decarboxylase 1                     | 725  |
| zinc finger and BTB domain containing 6                | 55   |
| ubiquitin specific peptidase 37                        | 14   |
| solute carrier family 46 (folate transporter),         | 580  |
| Ras association (RalGDS/AF-6) domain family me         | 27   |
| BAI1-associated protein 3                              | 10   |
| cap methyltransferase 1                                | 109  |
| RAD23 homolog B ( <i>S. cerevisiae</i> )               | 1012 |
| PRELI domain containing 2                              | 63   |
| family with sequence similarity 122A                   | 1277 |
| phospholipid scramblase 1                              | 220  |
| synapse defective 1, Rho GTPase, homolog 2 ( <i>C.</i> | 72   |
| nuclear factor I/C (CCAAT-binding transcriptio         | 26   |
| zinc finger protein 516                                | 311  |
| branched chain keto acid dehydrogenase E1, bet         | 143  |
| F-box protein 46                                       | 197  |
| keratin associated protein 4-9                         | 10   |
| dual specificity phosphatase 3                         | 836  |
| myelin basic protein                                   | 96   |
| family with sequence similarity 63, member B           | 41   |
| piezo-type mechanosensitive ion channel compon         | 158  |
| Uncharacterized protein                                | 5    |
| cytoplasmic polyadenylation element binding pr         | 367  |
| sema domain, immunoglobulin domain (Ig), short         | 85   |
| inhibitor of DNA binding 4, dominant negative          | 3400 |
| membrane bound O-acyltransferase domain contai         | 1145 |
| cAMP responsive element binding protein 1              | 295  |
| calcium channel, voltage-dependent, T type, al         | 11   |
| F-box and leucine-rich repeat protein 4                | 321  |
| neutral cholesterol ester hydrolase 1                  | 1779 |
| pogo transposable element with ZNF domain              | 170  |
| ubiquitin protein ligase E3 component n-recogn         | 728  |
| SERTA domain containing 4                              | 296  |
| Kruppel-like factor 8                                  | 8    |
| activating signal cointegrator 1 complex subun         | 293  |
| shroom family member 2                                 | 121  |
| protein kinase C, alpha                                | 726  |



|                                                |      |
|------------------------------------------------|------|
| zinc finger protein 532                        | 5    |
| microtubule-associated protein 1B              | 259  |
| tachykinin receptor 1                          | 5    |
| signal-regulatory protein beta 2               | 5    |
| tetraspanin 1                                  | 16   |
| KIAA1009                                       | 7    |
| hippocalcin like 4                             | 5    |
| dpy-19-like 3 (C. elegans)                     | 146  |
| UHRF1 binding protein 1                        | 360  |
| 2-oxoglutarate and iron-dependent oxygenase do | 2120 |
| SIX homeobox 5                                 | 47   |
| limbic system-associated membrane protein      | 19   |
| tetraspanin 2                                  | 43   |
| gap junction protein, gamma 1, 45kDa           | 195  |
| zinc finger protein 845                        | 67   |
| chondroitin sulfate synthase 3                 | 221  |
| POU class 2 homeobox 2                         | 5    |
| ankyrin repeat domain 42                       | 224  |
| ELMO/CED-12 domain containing 3                | 31   |
| poly (ADP-ribose) polymerase family, member 9  | 456  |
| myopalladin                                    | 73   |
| KIAA1199                                       | 660  |
| ankyrin repeat domain 10                       | 37   |
| BCL6 corepressor-like 1                        | 209  |
| adenosine monophosphate deaminase 3            | 5    |
| complement component 2                         | 52   |
| nuclear RNA export factor 1                    | 1017 |
| GRB2-associated binding protein family, member | 5    |
| DEP domain containing 5                        | 221  |
| tubby bipartite transcription factor           | 743  |
| nipsnap homolog 3B (C. elegans)                | 26   |
| RNA binding motif (RNP1, RRM) protein 3        | 1325 |
| integrin, alpha 6                              | 1328 |
| GDP-D-glucose phosphorylase 1                  | 65   |
| inhibitor of growth family, member 5           | 529  |
| solute carrier family 25, member 44            | 760  |
| family with sequence similarity 168, member B  | 122  |
| chromobox homolog 6                            | 215  |
| ATP synthase mitochondrial F1 complex assembly | 1637 |
| mitochondrial ribosomal protein L19            | 816  |
| SMAD family member 5                           | 225  |
| decapping enzyme, scavenger                    | 320  |
| regulation of nuclear pre-mRNA domain containi | 280  |
| immunity-related GTPase family, Q              | 62   |
| solute carrier family 30 (zinc transporter), m | 711  |
| SDA1 domain containing 1                       | 91   |
| zinc finger protein 285                        | 31   |
| cyclin-dependent kinase 19                     | 51   |
| zinc finger protein 287                        | 14   |
| aryl hydrocarbon receptor nuclear translocator | 574  |
| DEAD (Asp-Glu-Ala-Asp) box polypeptide 46      | 472  |
| ceramide synthase 3                            | 5    |
| SID1 transmembrane family, member 1            | 5    |
| shisa family member 7                          | 5    |

|                                                |      |
|------------------------------------------------|------|
| zinc finger protein 831                        | 5    |
| regulating synaptic membrane exocytosis 1      | 45   |
| BEN domain containing 3                        | 13   |
| WD repeat domain 52                            | 5    |
| phosphatidylinositol-3,4,5-trisphosphate-depen | 14   |
| Scm-like with four mbt domains 2               | 107  |
| PDZ domain containing 2                        | 5    |
| 5-hydroxytryptamine (serotonin) receptor 7, ad | 12   |
| piccolo presynaptic cytomatrix protein         | 22   |
| leucine zipper, putative tumor suppressor 1    | 33   |
| DIP2 disco-interacting protein 2 homolog B (Dr | 1613 |
| TRAF family member-associated NFKB activator   | 176  |
| biogenesis of lysosomal organelles complex-1,  | 2383 |
| AT rich interactive domain 3A (BRIGHT-like)    | 320  |
| potassium large conductance calcium-activated  | 8    |
| platelet-activating factor acetylhydrolase 1b, | 180  |
| eukaryotic translation initiation factor 2, su | 575  |
| formin 1                                       | 25   |
| collagen beta(1-0)galactosyltransferase 1      | 427  |
| zinc finger protein 605                        | 147  |
| homeobox and leucine zipper encoding           | 100  |
| homeodomain interacting protein kinase 1       | 930  |
| Rho GTPase activating protein 39               | 14   |
| proline-rich transmembrane protein 4           | 5    |
| phosphoinositide-interacting regulator of tran | 5    |
| lysine (K)-specific demethylase 5C             | 422  |
| sidekick cell adhesion molecule 2              | 8    |
| DENN/MADD domain containing 4B                 | 167  |
| ST6 (alpha-N-acetyl-neuraminyl-2,3-beta-galact | 28   |
| GEM interacting protein                        | 9    |
| zinc finger protein 652                        | 33   |
| alcohol dehydrogenase 5 (class III), chi polyp | 217  |
| deiodinase, iodothyronine, type II             | 98   |
| leucine zipper transcription factor-like 1     | 593  |
| angel homolog 1 (Drosophila)                   | 299  |
| ras responsive element binding protein 1       | 340  |
| glutamate-ammonia ligase                       | 1073 |
| HECT, C2 and WW domain containing E3 ubiquitin | 28   |
| natural killer-tumor recognition sequence      | 798  |
| NACC family member 2, BEN and BTB (POZ) domain | 172  |
| RAB5C, member RAS oncogene family              | 96   |
| phosphoinositide kinase, FYVE finger containin | 107  |
| transcriptional adaptor 2A                     | 278  |
| nucleus accumbens associated 1, BEN and BTB (P | 337  |
| ELK3, ETS-domain protein (SRF accessory protei | 2719 |
| poliovirus receptor-related 1 (herpesvirus ent | 50   |
| CDNA FLJ27243 fis, clone SYN08134; Uncharacter | 5    |
| vav 2 guanine nucleotide exchange factor       | 477  |
| additional sex combs like 2 (Drosophila)       | 139  |
| melanocortin 2 receptor (adrenocorticotropic h | 5    |
| neuronal PAS domain protein 3                  | 9    |
| kinesin family member C3                       | 65   |
| pumilio RNA-binding family member 2            | 1047 |
| gamma-glutamyl carboxylase                     | 254  |

|                                                |      |
|------------------------------------------------|------|
| N(alpha)-acetyltransferase 50, NatE catalytic  | 260  |
| Ras homolog enriched in brain                  | 14   |
| checkpoint kinase 1                            | 338  |
| ATP-binding cassette, sub-family A (ABC1), mem | 159  |
| ariadne RBR E3 ubiquitin protein ligase 2      | 938  |
| guanylate binding protein 2, interferon-induci | 1309 |
| phosphatidylinositol-5-phosphate 4-kinase, typ | 457  |
| homeobox B6                                    | 12   |
| wingless-type MMTV integration site family, me | 28   |
| patched domain containing 4                    | 19   |
| two pore segment channel 2                     | 629  |
| double homeobox A                              | 5    |
| dual specificity phosphatase 7                 | 68   |
| DnaJ (Hsp40) homolog, subfamily C, member 28   | 24   |
| transient receptor potential cation channel, s | 18   |
| aldo-keto reductase family 1, member C2        | 5    |
| homeobox C13                                   | 63   |
| spectrin, beta, non-erythrocytic 5             | 7    |
| coiled-coil domain containing 120              | 170  |
| paired box 5                                   | 5    |
| dipeptidyl-peptidase 10 (non-functional)       | 5    |
| KIAA1524                                       | 498  |
| collagen, type III, alpha 1                    | 215  |
| transducer of ERBB2, 2                         | 71   |
| HemK methyltransferase family member 1         | 99   |
| EDAR-associated death domain                   | 76   |
| PRP40 pre-mRNA processing factor 40 homolog A  | 459  |
| chromosome 12 open reading frame 23            | 602  |
| sarcospan                                      | 25   |
| cancer susceptibility candidate 10             | 116  |
| insulin receptor substrate 1                   | 804  |
| abl-interactor 2                               | 877  |
| A kinase (PRKA) anchor protein 13              | 53   |
| tripartite motif containing 46                 | 69   |
| ribonucleoprotein, PTB-binding 1               | 362  |
| ubiquitin-conjugating enzyme E2Z               | 3688 |
| period circadian clock 3                       | 16   |
| mutated in colorectal cancers                  | 115  |
| kelch repeat and BTB (POZ) domain containing 8 | 22   |
| radical S-adenosyl methionine domain containin | 463  |
| arylacetamide deacetylase-like 3               | 5    |
| serine/threonine kinase 36                     | 218  |
| U2 small nuclear RNA auxiliary factor 2        | 1093 |
| peptidylprolyl isomerase (cyclophilin)-like 2  | 1911 |
| phosphodiesterase 11A                          | 7    |
| thyrotrophic embryonic factor                  | 60   |
| mitogen-activated protein kinase-activated pro | 155  |
| metallophosphoesterase domain containing 1     | 51   |
| molybdenum cofactor sulfurase                  | 627  |
| tumor protein p53 inducible nuclear protein 1  | 39   |
| chromosome 3 open reading frame 70             | 19   |
| nicalin                                        | 442  |
| WD repeat domain 59                            | 24   |
| mediator complex subunit 29                    | 2453 |

|                                                            |      |
|------------------------------------------------------------|------|
| chromosome 20 open reading frame 144                       | 10   |
| sorting nexin family member 30                             | 33   |
| pleckstrin and Sec7 domain containing 4                    | 72   |
| signal transducer and activator of transcripti             | 478  |
| hairly/enhancer-of-split related with YRPW moti            | 37   |
| Kv channel interacting protein 2                           | 5    |
| formin-like 2                                              | 31   |
| Uncharacterized protein                                    | 200  |
| nuclear fragile X mental retardation protein i             | 440  |
| tensin 1                                                   | 591  |
| sodium channel, voltage-gated, type II, alpha              | 7    |
| chromodomain protein, Y-like 2                             | 239  |
| family with sequence similarity 110, member B              | 60   |
| ATPase, H <sup>+</sup> transporting, lysosomal 42kDa, V1 s | 951  |
| methionine adenosyltransferase II, alpha                   | 8    |
| secretogranin III                                          | 15   |
| proprotein convertase subtilisin/kexin type 1              | 83   |
| phosphodiesterase 4D interacting protein                   | 36   |
| TBC1 domain family, member 30                              | 153  |
| aspartylglucosaminidase                                    | 601  |
| lysine (K)-specific methyltransferase 2D                   | 78   |
| leucine zipper and CTNBP1 domain containing                | 508  |
| c-abl oncogene 2, non-receptor tyrosine kinase             | 892  |
| zinc finger, BED-type containing 1                         | 5    |
| solute carrier family 6 (neurotransmitter tran             | 5    |
| excision repair cross-complementing rodent rep             | 93   |
| cytochrome c-1                                             | 2640 |
| FLYWCH-type zinc finger 1                                  | 97   |
| heparan sulfate (glucosamine) 3-O-sulfotransfe             | 1489 |
| carbonic anhydrase VII                                     | 5    |
| N-ethylmaleimide-sensitive factor attachment p             | 82   |
| DCN1, defective in cullin neddylation 1, domai             | 267  |
| Src-like-adaptor 2                                         | 5    |
| ST8 alpha-N-acetyl-neuraminide alpha-2,8-sialy             | 5    |
| activin A receptor, type IIB                               | 21   |
| zinc finger and BTB domain containing 7A                   | 37   |
| TEA domain family member 2                                 | 589  |
| presenilin 1                                               | 1340 |
| tankyrase, TRF1-interacting ankyrin-related AD             | 943  |
| NHL repeat containing 2                                    | 368  |
| TGFB1-induced anti-apoptotic factor 1                      | 152  |
| Rho GTPase activating protein 17                           | 1337 |
| 5-hydroxytryptamine (serotonin) receptor 1D, G             | 99   |
| golgi transport 1B                                         | 848  |
| myeloid/lymphoid or mixed-lineage leukemia (tr             | 24   |
| family with sequence similarity 78, member A               | 7    |
| chromosome 17 open reading frame 85                        | 718  |
| SRY (sex determining region Y)-box 6                       | 22   |
| purinergic receptor P2X, ligand-gated ion chan             | 260  |
| zinc finger, BED-type containing 4                         | 2276 |
| zinc finger protein 70                                     | 99   |
| NLR family, pyrin domain containing 5                      | 5    |
| phenylalanyl-tRNA synthetase, alpha subunit                | 1994 |
| testis development related protein                         | 235  |

|                                                                         |      |
|-------------------------------------------------------------------------|------|
| synaptogyrin 1                                                          | 101  |
| transmembrane protein 55A                                               | 151  |
| ectodysplasin A2 receptor                                               | 64   |
| lysophosphatidylglycerol acyltransferase 1                              | 135  |
| E74-like factor 4 (ets domain transcription fa                          | 69   |
| synaptic vesicle glycoprotein 2A                                        | 10   |
| TBC1 domain family, member 10C                                          | 5    |
| angiomin                                                                | 515  |
| fin bud initiation factor homolog (zebrafish)                           | 135  |
| zinc finger protein 484                                                 | 22   |
| transcription factor AP-2 beta (activating enh                          | 23   |
| histamine N-methyltransferase                                           | 530  |
| heparan-alpha-glucosaminide N-acetyltransferas                          | 865  |
| tubulin, beta 4B class IVb                                              | 101  |
| ceramide synthase 6                                                     | 1932 |
| GRB2-associated binding protein 1                                       | 26   |
| arylsulfatase B                                                         | 86   |
| carboxypeptidase M                                                      | 125  |
| ATPase, class V, type 10D                                               | 440  |
| ankyrin 2, neuronal                                                     | 133  |
| G protein-coupled receptor 75                                           | 35   |
| epiregulin                                                              | 5    |
| argonaute RISC catalytic component 4                                    | 96   |
| tripartite motif containing 26                                          | 102  |
| family with sequence similarity 117, member A                           | 185  |
| HAUS augmin-like complex, subunit 6                                     | 24   |
| Rho GTPase activating protein 32                                        | 13   |
| protein tyrosine phosphatase, receptor type, f                          | 21   |
| sal-like 2 (Drosophila)                                                 | 233  |
| annexin A11                                                             | 2285 |
| interleukin 17 receptor D                                               | 108  |
| regulator of G-protein signaling 10                                     | 457  |
| bobby sox homolog (Drosophila)                                          | 141  |
| adaptor-related protein complex 5, mu 1 subuni                          | 198  |
| transcription elongation factor B (SIII), poly                          | 637  |
| EFR3 homolog B (S. cerevisiae)                                          | 14   |
| HCG1787533; Uncharacterized protein                                     | 14   |
| aminoacyl tRNA synthetase complex-interacting                           | 740  |
| adaptor-related protein complex 5, sigma 1 sub                          | 492  |
| kelch-like family member 38                                             | 13   |
| zinc and ring finger 1, E3 ubiquitin protein 1                          | 519  |
| solute carrier family 12 (potassium/chloride t                          | 5    |
| ATPase, Na <sup>+</sup> /K <sup>+</sup> transporting, beta 2 polypeptid | 34   |
| transmembrane protein 255A                                              | 113  |
| zinc finger CCCH-type containing 12B                                    | 29   |
| mitogen-activated protein kinase kinase 6                               | 235  |
| cytochrome P450, family 27, subfamily B, polyp                          | 11   |
| YTH domain family, member 3                                             | 444  |
| MLX, MAX dimerization protein                                           | 771  |
| glucoside xylosyltransferase 2                                          | 207  |
| GINS complex subunit 2 (Psf2 homolog)                                   | 136  |
| F-box protein 41                                                        | 175  |
| methyltransferase like 2B                                               | 22   |
| glucosamine-6-phosphate deaminase 2                                     | 117  |

|                                                         |      |
|---------------------------------------------------------|------|
| zinc finger protein 799                                 | 17   |
| microtubule-associated protein 9                        | 45   |
| ankyrin repeat domain 40                                | 409  |
| mutL homolog 3                                          | 152  |
| tudor domain containing 6                               | 65   |
| nuclear transport factor 2                              | 222  |
| chromosome 6 open reading frame 89                      | 1972 |
| sterile alpha and TIR motif containing 1                | 130  |
| Sjogren syndrome nuclear autoantigen 1                  | 160  |
| zinc finger, CCHC domain containing 24                  | 359  |
| fibrosin-like 1                                         | 778  |
| potassium channel tetramerization domain conta          | 2483 |
| RasGEF domain family, member 1A                         | 10   |
| chromosome 3 open reading frame 14                      | 67   |
| SAR1 homolog B ( <i>S. cerevisiae</i> )                 | 1404 |
| kelch repeat and BTB (POZ) domain containing 1          | 173  |
| tau tubulin kinase 1                                    | 7    |
| mannosyl (beta-1,4-)-glycoprotein beta-1,4-N-a          | 9    |
| TBC1 domain family, member 2B                           | 5    |
| kinesin family member 3C                                | 177  |
| zinc finger protein 862                                 | 7    |
| discs, large ( <i>Drosophila</i> ) homolog-associated p | 5    |
| glycosylphosphatidylinositol specific phosphol          | 51   |
| TRAF-interacting protein with forkhead-associa          | 5    |
| hypoxia up-regulated 1                                  | 29   |
| chromosome 8 open reading frame 86                      | 5    |
| prostaglandin E receptor 3 (subtype EP3)                | 14   |
| transmembrane protein 151A                              | 163  |
| attractin-like 1                                        | 26   |
| ArfGAP with FG repeats 2                                | 3985 |
| period circadian clock 2                                | 106  |
| catsper channel auxiliary subunit gamma                 | 5    |
| meningioma (disrupted in balanced translocatio          | 15   |
|                                                         | 5    |
| C2 calcium-dependent domain containing 2                | 106  |
| one cut homeobox 3                                      | 5    |
| unc-5 homolog B ( <i>C. elegans</i> )                   | 90   |
| ribosomal protein S14                                   | 2353 |
| cytochrome P450, family 4, subfamily F, polype          | 5    |
| calcium homeostasis modulator 1                         | 5    |
| Fas apoptotic inhibitory molecule 2                     | 5    |
| synaptotagmin IX                                        | 5    |
| zinc finger, FYVE domain containing 26                  | 104  |
| potassium voltage-gated channel, Shaw-related           | 5    |
| solute carrier family 25 (pyrimidine nucleotid          | 264  |
| Ras association (RalGDS/AF-6) domain family (N          | 9    |
| F-box and WD repeat domain containing 2                 | 227  |
| coiled-coil domain containing 47                        | 1484 |
| lysine (K)-specific demethylase 5B                      | 187  |
| v-erb-b2 avian erythroblastic leukemia viral o          | 511  |
| ubiquitin specific peptidase 10                         | 66   |
| GID complex subunit 4                                   | 79   |
| ELKS/RAB6-interacting/CAST family member 1              | 159  |
| cleavage and polyadenylation specific factor 4          | 7    |

|                                                |      |
|------------------------------------------------|------|
| choline dehydrogenase                          | 249  |
| DnaJ (Hsp40) homolog, subfamily C, member 5    | 1089 |
| influenza virus NS1A binding protein           | 2215 |
| ring finger protein 8, E3 ubiquitin protein li | 301  |
| formin binding protein 1                       | 165  |
| dystrophin                                     | 211  |
| cell adhesion molecule 3                       | 5    |
| TVP23C-CDRT4 readthrough                       | 109  |
| family with sequence similarity 179, member B  | 12   |
| Uncharacterized protein                        | 5    |
| zinc finger protein 331                        | 553  |
| chromosome 10 open reading frame 126           | 5    |
| actin filament associated protein 1            | 1966 |
| tetratricopeptide repeat domain 7A             | 400  |
| tuberous sclerosis 1                           | 838  |
| importin 11                                    | 202  |
| Myb-like, SWIRM and MPN domains 1              | 38   |
| Sin3A-associated protein, 30kDa                | 43   |
| TGF-beta activated kinase 1/MAP3K7 binding pro | 577  |
| protein phosphatase 2, regulatory subunit B'', | 32   |
| inner centromere protein antigens 135/155kDa   | 1299 |
| dual specificity phosphatase 22                | 1330 |
| family with sequence similarity 172, member A  | 257  |
| murine retrovirus integration site 1 homolog   | 26   |
| bromodomain and PHD finger containing, 3       | 7032 |
| single-minded homolog 1 (Drosophila)           | 104  |
| lactation elevated 1                           | 42   |
| DEAH (Asp-Glu-Ala-His) box polypeptide 36      | 108  |
| coiled-coil domain containing 6                | 193  |
| ArfGAP with GTPase domain, ankyrin repeat and  | 109  |
| transducin (beta)-like 1X-linked               | 125  |
| zinc finger and BTB domain containing 8A       | 287  |
| notch 2                                        | 734  |
| inducible T-cell co-stimulator ligand          | 47   |
| RAD18 homolog (S. cerevisiae)                  | 211  |
| zinc finger protein 426                        | 70   |
| epidermal growth factor receptor               | 632  |
| vasoactive intestinal peptide receptor 2       | 35   |
| transmembrane protein 81                       | 17   |
| zinc finger protein 730                        | 8    |
| mesoderm induction early response 1, family me | 137  |
| immunoglobulin-like domain containing receptor | 7    |
| integrin, alpha M (complement component 3 rece | 10   |
| two pore segment channel 1                     | 401  |
| MACRO domain containing 2                      | 5    |
| carbohydrate (N-acetylgalactosamine 4-sulfate  | 59   |
| golgin A3                                      | 944  |
| Fanconi anemia, complementation group C        | 408  |
| coatomer protein complex, subunit zeta 1       | 2623 |
| F-box protein 30                               | 224  |
| stanniocalcin 1                                | 2932 |
| chromodomain helicase DNA binding protein 9    | 447  |
| protein tyrosine phosphatase, receptor type, E | 44   |
| EF-hand calcium binding domain 11              | 25   |

|                                                |      |
|------------------------------------------------|------|
| pyruvate dehydrogenase phosphatase regulatory  | 69   |
| anoctamin 10                                   | 330  |
| zinc finger protein 24                         | 1796 |
| GRAM domain containing 3                       | 232  |
| PDZ domain containing 4                        | 7    |
| zinc finger protein 346                        | 5    |
| tweety family member 1                         | 5    |
| Sec61 alpha 1 subunit ( <i>S. cerevisiae</i> ) | 2966 |
| arylsulfatase G                                | 73   |
| SRY (sex determining region Y)-box 1           | 5    |
| glutamate receptor, ionotropic, AMPA 1         | 5    |
| androgen-induced 1                             | 1226 |
| MYC induced nuclear antigen                    | 209  |
| colony stimulating factor 3 receptor (granuloc | 49   |
| TWIST neighbor                                 | 133  |
| chromosome 4 open reading frame 46             | 128  |
| spermatogenesis associated 5                   | 168  |
| phospholipase C, gamma 1                       | 69   |
| MAP/microtubule affinity-regulating kinase 4   | 192  |
| zinc finger and BTB domain containing 40       | 124  |
| glycerophosphocholine phosphodiesterase GDE1 h | 155  |
| janus kinase and microtubule interacting prote | 26   |
| F-box and leucine-rich repeat protein 7        | 16   |
| deleted in lymphocytic leukemia 1 (non-protein | 22   |
| potassium voltage-gated channel, delayed-recti | 5    |
| family with sequence similarity 109, member B  | 78   |
| tetraspanin 9                                  | 1410 |
| retinol binding protein 2, cellular            | 46   |
| Rho GTPase activating protein 44               | 22   |
| UDP-N-acetyl-alpha-D-galactosamine:polypeptide | 953  |
| nuclear receptor binding SET domain protein 1  | 685  |
| dual specificity phosphatase 4                 | 245  |
| TBC1 domain containing kinase                  | 20   |
| selectin P ligand                              | 20   |
| G protein-coupled receptor 156                 | 12   |
| growth arrest-specific 7                       | 186  |
| nucleobindin 2                                 | 71   |
| A kinase (PRKA) anchor protein 6               | 5    |
| porcupine homolog ( <i>Drosophila</i> )        | 35   |
| glutamate receptor, metabotropic 5             | 5    |
| RNA binding motif protein 5                    | 150  |
| bestrophin 3                                   | 5    |
| G protein-coupled receptor 176                 | 2683 |
| Rho GTPase activating protein 33               | 8    |
| RPTOR independent companion of MTOR, complex 2 | 441  |
| B lymphoid tyrosine kinase                     | 5    |
| neurexin 3                                     | 14   |
| transmembrane protein, adipocyte associated 1  | 44   |
| aryl-hydrocarbon receptor repressor            | 1049 |
| Rho guanine nucleotide exchange factor (GEF) 5 | 200  |
| TBC1 domain family, member 19                  | 77   |
| PRKC, apoptosis, WT1, regulator                | 1872 |
| RAP1A, member of RAS oncogene family           | 382  |
| solute carrier family 22, member 23            | 353  |



|                                                |      |
|------------------------------------------------|------|
| MRE11 meiotic recombination 11 homolog A (S. c | 199  |
| telomerase-associated protein 1                | 39   |
| TAF9B RNA polymerase II, TATA box binding prot | 19   |
| dynein, axonemal, light intermediate chain 1   | 56   |
| teashirt zinc finger homeobox 2                | 351  |
| pleckstrin homology domain containing, family  | 144  |
| NK3 homeobox 2                                 | 36   |
| phosphatidylinositol 3-kinase, catalytic subun | 286  |
| SET domain containing 5                        | 48   |
| origin recognition complex, subunit 4          | 1180 |
| BCL2/adenovirus E1B 19kDa interacting protein  | 1255 |
| isoprenoid synthase domain containing          | 12   |
| C2 calcium-dependent domain containing 4C      | 70   |
| phosphodiesterase 8A                           | 183  |
| oligodendrocytic myelin paranodal and inner lo | 5    |
| zinc finger protein 701                        | 15   |
| ring finger and SPRY domain containing 1       | 735  |
| frizzled family receptor 1                     | 391  |
| sparc/osteonectin, cwcv and kazal-like domains | 31   |
| ArfGAP with coiled-coil, ankyrin repeat and PH | 253  |
| Werner syndrome, RecQ helicase-like            | 560  |
| ClpB caseinolytic peptidase B homolog (E. coli | 476  |
| SWI/SNF related, matrix associated, actin depe | 298  |
| 1-acylglycerol-3-phosphate 0-acyltransferase 4 | 142  |
| zinc finger protein 626                        | 24   |
| malate dehydrogenase 1B, NAD (soluble)         | 20   |
| musashi RNA-binding protein 2                  | 283  |
| arylsulfatase family, member I                 | 19   |
| enhancer of yellow 2 homolog (Drosophila)      | 1814 |
| solute carrier family 20 (phosphate transporte | 205  |
| F-box and leucine-rich repeat protein 19       | 75   |
| putative homeodomain transcription factor 2    | 1730 |
| katanin p60 subunit A-like 1                   | 335  |
| ankyrin repeat domain 33B                      | 9    |
| Ras-related GTP binding D                      | 644  |
| arginine-glutamic acid dipeptide (RE) repeats  | 199  |
| WW and C2 domain containing 1                  | 43   |
| tubulin tyrosine ligase                        | 442  |
| anterior gradient 2                            | 13   |
| Nedd4 family interacting protein 2             | 1747 |
| mitochondrial poly(A) polymerase               | 137  |
| family with sequence similarity 110, member A  | 73   |
| heparan sulfate (glucosamine) 3-O-sulfotransfe | 9    |
| huntingtin interacting protein 1               | 37   |
| AT rich interactive domain 5B (MRF1-like)      | 397  |
| basal cell adhesion molecule (Lutheran blood g | 4647 |
| KIAA0232                                       | 119  |
| solute carrier family 35 (UDP-GlcA/UDP-GalNAc  | 186  |
| plexin C1                                      | 47   |
| collagen, type V, alpha 3                      | 5    |
| kelch repeat and BTB (POZ) domain containing 1 | 5    |
| glutamate receptor, ionotropic, N-methyl-D-asp | 5    |
| SLIT and NTRK-like family, member 4            | 86   |
| Rho family GTPase 2                            | 26   |

|                                                |      |
|------------------------------------------------|------|
|                                                | 141  |
| CXADR-like membrane protein                    | 212  |
| zwilch kinetochore protein                     | 43   |
| solute carrier family 25 (mitochondrial oxoadi | 110  |
| sema domain, immunoglobulin domain (Ig), short | 54   |
| HECT, C2 and WW domain containing E3 ubiquitin | 11   |
| STEAP family member 3, metalloreductase        | 160  |
| leucyl/cystinyl aminopeptidase                 | 28   |
| amion associated transmembrane protein         | 71   |
| TATA box binding protein (TBP)-associated fact | 73   |
| zinc finger protein 155                        | 13   |
| PR domain containing 16                        | 64   |
| RAD51 paralog D                                | 73   |
| MARVEL domain containing 2                     | 227  |
| widely interspaced zinc finger motifs          | 1321 |
| one cut homeobox 1                             | 10   |
| arrestin, beta 1                               | 598  |
| zinc finger protein 592                        | 1128 |
| RAD1 homolog (S. pombe)                        | 584  |
| transcription factor Dp-2 (E2F dimerization pa | 128  |
| myosin IE                                      | 198  |
| mitochondrial ribosomal protein L4             | 3854 |
| kringle containing transmembrane protein 1     | 606  |
| kelch-like family member 29                    | 414  |
| sodium channel, voltage-gated, type IV, alpha  | 5    |
| hyaluronan synthase 3                          | 15   |
| G protein-coupled receptor 116                 | 5    |
| gap junction protein, delta 3, 31.9kDa         | 0    |
| ubiquitin specific peptidase 2                 | 19   |
| La ribonucleoprotein domain family, member 1   | 4979 |
| transmembrane protein 181                      | 924  |
| poly(A)-specific ribonuclease                  | 5    |
| nuclear receptor binding protein 2             | 1011 |
| unc-45 homolog B (C. elegans)                  | 5    |
| chromodomain helicase DNA binding protein 2    | 1237 |
| proprotein convertase subtilisin/kexin type 2  | 9    |
| zinc finger protein 646                        | 5    |
| microtubule-associated protein 4               | 3914 |
| storkhead box 2                                | 379  |
| Rho-associated, coiled-coil containing protein | 7    |
| zinc finger and BTB domain containing 4        | 1039 |
| zinc finger, DBF-type containing 2             | 102  |
| chromodomain helicase DNA binding protein 6    | 85   |
| tripartite motif containing 33                 | 201  |
| AHNAK nucleoprotein                            | 682  |
| fem-1 homolog a (C. elegans)                   | 57   |
| protein phosphatase 1, regulatory subunit 16B  | 16   |
| scratch homolog 1, zinc finger protein (Drosop | 5    |
| like-glycosyltransferase                       | 411  |
| collagen, type VIII, alpha 2                   | 15   |
| platelet-activating factor receptor            | 5    |
| mannosyl (alpha-1,6-)-glycoprotein beta-1,6-N- | 1627 |
| protein phosphatase 2, regulatory subunit B',  | 13   |
| membrane-associated ring finger (C3HC4) 9      | 328  |

|                                                            |      |
|------------------------------------------------------------|------|
| dedicator of cytokinesis 5                                 | 504  |
| ribosomal protein S6 kinase, 90kDa, polypeptid             | 1043 |
| transmembrane protein 237                                  | 2209 |
| protein serine kinase H1                                   | 699  |
| zinc finger, matrin-type 3                                 | 459  |
| synapse associated protein 1                               | 2689 |
| pantothenate kinase 3                                      | 522  |
| hemochromatosis                                            | 563  |
| microtubule associated serine/threonine kinase             | 317  |
| required for meiotic nuclear division 5 homolo             | 959  |
| regulating synaptic membrane exocytosis 3                  | 24   |
| ATPase, H <sup>+</sup> transporting, lysosomal 31kDa, V1 s | 2139 |
| solute carrier family 16 (aromatic amino acid              | 233  |
| RAB interacting factor                                     | 948  |
| natural killer cell cytotoxicity receptor 3 li             | 214  |
| mitochondrial ribosomal protein S16                        | 3942 |
| transcription factor CP2-like 1                            | 36   |
| peptidyl-tRNA hydrolase domain containing 1                | 1255 |
| son of sevenless homolog 1 (Drosophila)                    | 189  |
| ADP-ribosylation factor-like 10                            | 236  |
| mitochondrial ribosome recycling factor                    | 85   |
| GRAM domain containing 2                                   | 5    |
| N-acetyltransferase 9 (GCN5-related, putative)             | 36   |
| COP9 signalosome subunit 7B                                | 331  |
| ataxin 2                                                   | 7    |
| cyclin-dependent kinase 16                                 | 2095 |
| prion protein                                              | 1136 |
| lysine-rich nucleolar protein 1                            | 157  |
| basic helix-loop-helix family, member a15                  | 136  |
| GDP-mannose pyrophosphorylase B                            | 425  |
| dynein, cytoplasmic 1, light intermediate chai             | 2144 |
| TNF receptor-associated factor 6, E3 ubiquitin             | 91   |
| kinesin family member 6                                    | 12   |
| RAB11 family interacting protein 4 (class II)              | 169  |
| acyl-CoA binding domain containing 5                       | 77   |
| early B-cell factor 1                                      | 42   |
| cyclin D2                                                  | 66   |
| cell division cycle associated 2                           | 215  |
| N-myristoyltransferase 2                                   | 318  |
| 3-phosphoinositide dependent protein kinase-1              | 104  |
| leukemia inhibitory factor receptor alpha                  | 44   |
| BTB and CNC homology 1, basic leucine zipper t             | 74   |
| nucleolar protein 10                                       | 106  |
| RAB3A interacting protein                                  | 73   |
| autophagy related 2B                                       | 146  |
| leucine rich repeat containing 8 family, membe             | 326  |
| adenylate cyclase 2 (brain)                                | 13   |
| pregnancy-associated plasma protein A, pappaly             | 350  |
| cullin 2                                                   | 27   |
| cyclin E2                                                  | 76   |
| tripartite motif containing 13                             | 139  |
| growth differentiation factor 11                           | 847  |
| DnaJ (Hsp40) homolog, subfamily C, member 18               | 253  |
| sodium channel, voltage-gated, type II, beta s             | 5    |

|                                                    |      |
|----------------------------------------------------|------|
| SID1 transmembrane family, member 2                | 341  |
| homeobox C8                                        | 5    |
| SPOC domain containing 1                           | 755  |
| leucine-rich repeats and immunoglobulin-like d     | 348  |
| ST6 (alpha-N-acetyl-neuraminyl-2,3-beta-galact     | 41   |
| cytosolic thiouridylase subunit 1                  | 170  |
| potassium channel, subfamily K, member 3           | 19   |
| centromere protein I                               | 379  |
| tRNA-gammaW synthesizing protein 3 homolog (S. cer | 140  |
| tetratricopeptide repeat domain 39C                | 494  |
| programmed cell death 11                           | 1551 |
| mitogen-activated protein kinase kinase kinase     | 1551 |
| pituitary tumor-transforming 1 interacting pro     | 1170 |
| small nuclear ribonucleoprotein D3 polypeptide     | 3251 |
| solute carrier family 10 (sodium/bile acid cot     | 7    |
| Uncharacterized protein                            | 24   |
| cytoplasmic linker associated protein 1            | 210  |
| zinc finger protein 333                            | 72   |
| hydroxysteroid (17-beta) dehydrogenase 12          | 1422 |
| guanine monphosphate synthase                      | 867  |
| inositol 1,4,5-trisphosphate receptor, type 2      | 334  |
| ubiquitin specific peptidase 36                    | 192  |
| decapping mRNA 2                                   | 155  |
| eukaryotic translation initiation factor 2-alpha   | 1726 |
| TBC1 domain family, member 16                      | 556  |
| helicase, lymphoid-specific                        | 329  |
| integrin, alpha 1                                  | 400  |
| methyl CpG binding protein 2 (Rett syndrome)       | 1474 |
| calcium/calmodulin-dependent protein kinase II     | 5    |
| visual system homeobox 2                           | 5    |
| RNA binding protein, fox-1 homolog (C. elegans     | 262  |
| E2F transcription factor 4, p107/p130-binding      | 1433 |
| von Willebrand factor D and EGF domains            | 9    |
| TXK tyrosine kinase                                | 7    |
| ring finger protein 152                            | 57   |
| stomatin (EPB72)-like 1                            | 18   |
| vacuolar protein sorting 39 homolog (S. cerevi     | 165  |
| folliculin-like 4                                  | 60   |
| arylsulfatase family, member K                     | 298  |
| leukocyte receptor cluster (LRC) member 1          | 14   |
| transforming growth factor, beta receptor 1        | 249  |
| ZFP82 zinc finger protein                          | 42   |
| zinc finger protein 566                            | 310  |
| laminin, gamma 1 (formerly LAMB2)                  | 1082 |
| solute carrier family 7 (amino acid transporte     | 1044 |
| sprouty-related, EVH1 domain containing 3          | 42   |
| ganglioside induced differentiation associated     | 28   |
| cat eye syndrome chromosome region, candidate      | 46   |
| interferon, lambda receptor 1                      | 15   |
| phosphodiesterase 7A                               | 84   |
| myosin IA                                          | 106  |
| sortilin 1                                         | 2111 |
| dynein, axonemal, heavy chain 10                   | 11   |
| protein arginine methyltransferase 10 (putativ     | 71   |

|                                                |      |
|------------------------------------------------|------|
| Rho GTPase activating protein 31               | 32   |
| methylenetetrahydrofolate reductase (NAD(P)H)  | 207  |
| ubiquitin specific peptidase 46                | 180  |
| general transcription factor IIIC, polypeptide | 1598 |
| cell cycle progression 1                       | 808  |
| succinate dehydrogenase complex, subunit C, in | 172  |
| DnaJ (Hsp40) homolog, subfamily C, member 11   | 361  |
| regulator of G-protein signaling 11            | 5    |
| 7-dehydrocholesterol reductase                 | 3418 |
| HCG1980662; Uncharacterized protein            | 60   |
| nuclear factor of kappa light polypeptide gene | 316  |
| thioesterase superfamily member 4              | 262  |
| pleckstrin homology domain containing, family  | 661  |
| beta-site APP-cleaving enzyme 1                | 486  |
| zinc finger, DHHC-type containing 14           | 253  |
| chitobiase, di-N-acetyl-                       | 33   |
| Rho GTPase activating protein 23               | 289  |
| B-cell CLL/lymphoma 2                          | 55   |
| platelet-activating factor acetylhydrolase 1b, | 1570 |
| zinc finger protein 597                        | 159  |
| epsin 2                                        | 1609 |
| solute carrier family 6 (neurotransmitter tran | 73   |
| pyruvate dehydrogenase kinase, isozyme 1       | 637  |
| kelch-like family member 11                    | 16   |
| aquarius intron-binding spliceosomal factor    | 314  |
| protein tyrosine phosphatase, receptor type, f | 167  |
| hexosaminidase A (alpha polypeptide)           | 209  |
| ribosomal RNA processing 8, methyltransferase, | 423  |
| X-ray radiation resistance associated 1        | 136  |
| lysophospholipase II                           | 21   |
| chromosome 5 open reading frame 63             | 42   |
| alanyl-tRNA synthetase 2, mitochondrial        | 262  |
| chromosome 2 open reading frame 69             | 82   |
| carbohydrate (N-acetylglucosamine 6-O) sulfotr | 37   |
| golgi SNAP receptor complex member 1           | 668  |
| single-minded homolog 2 (Drosophila)           | 108  |
| NIP7, nucleolar pre-rRNA processing protein    | 659  |
| family with sequence similarity 46, member C   | 74   |
| ankyrin repeat and EF-hand domain containing 1 | 25   |
| ribosome production factor 2 homolog (S. cerev | 869  |
| spindle and kinetochore associated complex sub | 199  |
| chromosome 21 open reading frame 59            | 288  |
| RAB3C, member RAS oncogene family              | 242  |
| pseudopodium-enriched atypical kinase 1        | 209  |
| methyltransferase like 16                      | 8    |
| sterol regulatory element binding transcriptio | 1518 |
| neuroigin 1                                    | 36   |
| myocyte enhancer factor 2D                     | 759  |
| carbohydrate (keratan sulfate Gal-6) sulfotran | 5    |
| sideroflexin 2                                 | 547  |
| cell division cycle 73                         | 579  |
| coiled-coil serine-rich protein 2              | 123  |
| spleen tyrosine kinase                         | 25   |
| lymphatic vessel endothelial hyaluronan recept | 5    |

|                                                |      |
|------------------------------------------------|------|
| Transmembrane 9 superfamily member 1           | 555  |
| GDNF family receptor alpha 2                   | 13   |
| OTU domain, ubiquitin aldehyde binding 1       | 2977 |
| transmembrane emp24 protein transport domain c | 612  |
| bromodomain PHD finger transcription factor    | 7    |
| DEAD (Asp-Glu-Ala-Asp) box polypeptide 31      | 174  |
| ribosomal protein S28                          | 375  |
| proteasome (prosome, macropain) inhibitor subu | 2709 |
| xylulokinase homolog (H. influenzae)           | 119  |
| NIMA-related kinase 9                          | 733  |
| SH3 and PX domains 2B                          | 123  |
| sorting nexin 9                                | 210  |
| regulation of nuclear pre-mRNA domain containi | 333  |
| transmembrane protein 186                      | 287  |
| KIAA1598                                       | 94   |
| AF4/FMR2 family, member 1                      | 28   |
| ceramide synthase 4                            | 1182 |
| myoneurin                                      | 289  |
| adaptor-related protein complex 1, gamma 1 sub | 436  |
| excision repair cross-complementing rodent rep | 118  |
| poly (ADP-ribose) polymerase 1                 | 1264 |
| transforming, acidic coiled-coil containing pr | 186  |
| zinc finger protein 614                        | 55   |
| zinc finger protein 519                        | 40   |
| RALY heterogeneous nuclear ribonucleoprotein   | 1489 |
| family with sequence similarity 26, member E   | 32   |
| thyroid hormone receptor, beta                 | 55   |
| helicase with zinc finger 2, transcriptional c | 692  |
| cold shock domain containing C2, RNA binding   | 31   |
| phospholipase A2-activating protein            | 416  |
| RIC8 guanine nucleotide exchange factor B      | 49   |
| small nuclear RNA activating complex, polypept | 211  |
| glycoprotein 2 (zymogen granule membrane)      | 29   |
| neural precursor cell expressed, developmental | 617  |
| centrosomal protein 85kDa-like                 | 14   |
| mitochondrial amidoxime reducing component 1   | 1613 |
| ankyrin repeat and SOCS box containing 16      | 14   |
| differentially expressed in FDCP 6 homolog (mo | 35   |
| SET domain containing 9                        | 45   |
| sodium/myo-inositol cotransporter              | 24   |
| diacylglycerol kinase, epsilon 64kDa           | 470  |
| IQ motif and Sec7 domain 1                     | 415  |
| La ribonucleoprotein domain family, member 4B  | 705  |
| microtubule-associated protein 2               | 68   |
| ORM1-like 3 (S. cerevisiae)                    | 82   |
| LanC lantibiotic synthetase component C-like 3 | 15   |
| limb development membrane protein 1            | 1435 |
| lysophosphatidic acid receptor 3               | 35   |
| cyclin-dependent kinase 9                      | 197  |
| IQ motif and Sec7 domain 2                     | 5    |
| uridine-cytidine kinase 2                      | 437  |
| polymerase (RNA) III (DNA directed) polypeptid | 490  |
| endo-beta-N-acetylglucosaminidase              | 33   |
| CUB and Sushi multiple domains 3               | 5    |

|                                                |      |
|------------------------------------------------|------|
| MLX interacting protein-like                   | 58   |
| sodium channel, voltage-gated, type VII, alpha | 5    |
| pleckstrin homology domain containing, family  | 279  |
| zinc finger protein 445                        | 370  |
| Tax1 (human T-cell leukemia virus type I) bind | 4402 |
| aryl hydrocarbon receptor                      | 25   |
| bladder cancer associated protein              | 38   |
| ubiquitin-conjugating enzyme E2Q family-like 1 | 10   |
| pleckstrin homology domain containing, family  | 11   |
| family with sequence similarity 49, member B   | 52   |
| armadillo repeat containing, X-linked 3        | 353  |
| protein kinase (cAMP-dependent, catalytic) inh | 542  |
| sema domain, immunoglobulin domain (Ig), short | 162  |
| zinc finger protein 347                        | 33   |
| neuronal growth regulator 1                    | 28   |
| dynein, axonemal, light chain 1                | 81   |
| protein phosphatase 2, regulatory subunit A, b | 341  |
| Sp1 transcription factor                       | 402  |
| zinc finger with KRAB and SCAN domains 3       | 63   |
| leucine zipper-EF-hand containing transmembran | 198  |
| chromosome 6 open reading frame 223            | 17   |
| ST3 beta-galactoside alpha-2,3-sialyltransfera | 102  |
| syntaxin 11                                    | 13   |
| potassium inwardly-rectifying channel, subfami | 9    |
| leucine-rich repeats and transmembrane domains | 5    |
| mannosyl (alpha-1,6-)-glycoprotein beta-1,6-N- | 85   |
| phosphatidylinositol-4,5-bisphosphate 3-kinase | 5    |
| large 60S subunit nuclear export GTPase 1      | 47   |
| ADAM metallopeptidase domain 23                | 113  |
| thioredoxin domain containing 5 (endoplasmic r | 1190 |
| RNA binding motif, single stranded interacting | 451  |
| KIAA0895-like                                  | 15   |
| G patch domain containing 2                    | 108  |
| DDHD domain containing 1                       | 103  |
| Rho GTPase activating protein 42               | 36   |
| ISL LIM homeobox 2                             | 381  |
| kinesin-associated protein 3                   | 42   |
| ankyrin repeat domain 34C                      | 5    |
| heparanase 2                                   | 12   |
| glucosidase, beta, acid                        | 27   |
| calcium/calmodulin-dependent protein kinase ID | 258  |
| sex comb on midleg-like 4 (Drosophila)         | 10   |
| cAMP responsive element binding protein 3-like | 2872 |
| arginine vasopressin-induced 1                 | 4404 |
| mitochondrial ribosomal protein S5             | 71   |
| notch 2 N-terminal like                        | 5    |
| SH3 domain and tetratricopeptide repeats 2     | 31   |
| v-yes-1 Yamaguchi sarcoma viral related oncoge | 61   |
| DEAD (Asp-Glu-Ala-Asp) box polypeptide 19A     | 148  |
| solute carrier family 10 (sodium/bile acid cot | 5    |
| filaggrin family member 2                      | 5    |
| BRCA1 associated protein-1 (ubiquitin carboxy- | 445  |
| polyhomeotic homolog 2 (Drosophila)            | 11   |
| zinc finger protein 416                        | 17   |

|                                                                               |      |
|-------------------------------------------------------------------------------|------|
| selenocysteine lyase                                                          | 232  |
| kin of IRRE like 3 (Drosophila)                                               | 16   |
| ADAM metallopeptidase with thrombospondin type<br>kelch-like family member 34 | 5    |
| neuralized homolog 1B (Drosophila)                                            | 5    |
| zinc finger, DHHC-type containing 5                                           | 1505 |
| zinc finger RNA binding protein 2                                             | 5    |
| cadherin, EGF LAG seven-pass G-type receptor 2                                | 2475 |
| phosphatidylinositol-4-phosphate 5-kinase, typ                                | 13   |
| ADAM metallopeptidase domain 8                                                | 9    |
| LIM homeobox transcription factor 1, alpha                                    | 5    |
| stathmin-like 3                                                               | 17   |
| SNF related kinase                                                            | 153  |
| family with sequence similarity 53, member B                                  | 27   |
| frizzled family receptor 4                                                    | 5    |
| potassium voltage-gated channel, KQT-like subf                                | 196  |
| cholinergic receptor, nicotinic, beta 2 (neuro                                | 16   |
| neuroblastoma breakpoint family, member 20                                    | 5    |
| solute carrier family 29 (equilibrative nucleo                                | 678  |
| chordin-like 1                                                                | 5    |
| guanine deaminase                                                             | 5    |
| RAB11 family interacting protein 1 (class I)                                  | 106  |
| chromosome 15 open reading frame 62                                           | 8    |
| low density lipoprotein receptor-related prote                                | 939  |
| WAS protein family, member 3                                                  | 24   |
| chromosome 1 open reading frame 172                                           | 190  |
| zinc finger protein 664                                                       | 736  |
| immunoglobulin superfamily, DCC subclass, memb                                | 464  |
| chromosome 4 open reading frame 50                                            | 5    |
| leucine zipper, down-regulated in cancer 1-lik                                | 348  |
| protein phosphatase 1, catalytic subunit, gamm                                | 3739 |
| acyl-CoA binding domain containing 4                                          | 10   |
| solute carrier family 2 (facilitated glucose t                                | 233  |
| UDP-N-acetyl-alpha-D-galactosamine:polypeptide                                | 2834 |
| Nik related kinase                                                            | 5    |
| zinc finger protein 37A                                                       | 11   |
| bone morphogenetic protein/retinoic acid induc                                | 5    |
| flavin containing monooxygenase 2 (non-functio                                | 5    |
| myosin, heavy chain 11, smooth muscle                                         | 5    |
| tumor necrosis factor, alpha-induced protein 2                                | 442  |
| deltex homolog 4 (Drosophila)                                                 | 5    |
| solute carrier family 39 (zinc transporter), m                                | 1510 |
| teneurin transmembrane protein 3                                              | 30   |
| ankyrin and armadillo repeat containing                                       | 5    |
| v-akt murine thymoma viral oncogene homolog 2                                 | 525  |
| transmembrane protease, serine 4                                              | 5    |
| fer (fps/fes related) tyrosine kinase                                         | 665  |
| pyrroline-5-carboxylate reductase 1                                           | 157  |
| anaphase promoting complex subunit 16                                         | 986  |
| delta-like 4 (Drosophila)                                                     | 605  |
| kinesin family member 16B                                                     | 113  |
| synaptopodin                                                                  | 311  |
| myelin transcription factor 1-like                                            | 5    |
| SET domain containing 1B                                                      | 703  |



|                                                   |       |
|---------------------------------------------------|-------|
| promyelocytic leukemia                            | 83    |
| laminin, alpha 4                                  | 605   |
| secreted frizzled-related protein 1               | 148   |
| cystatin C                                        | 11    |
| ATPase, Ca <sup>++</sup> transporting, ubiquitous | 40    |
| WD and tetratricopeptide repeats 1                | 137   |
| coiled-coil domain containing 64                  | 7     |
| diaphanous-related formin 1                       | 399   |
| cholinergic receptor, nicotinic, alpha 7 (neur    | 5     |
| immunoglobulin mu binding protein 2               | 34    |
| kelch-like family member 24                       | 143   |
| FERM, RhoGEF and pleckstrin domain protein 2      | 19    |
| Rho GTPase activating protein 6                   | 12    |
| paralemmin                                        | 341   |
| calcium channel, voltage-dependent, R type, al    | 5     |
| nucleoporin 188kDa                                | 3481  |
| EPH receptor A8                                   | 5     |
| THUMP domain containing 1                         | 39    |
| kinesin family member 1B                          | 234   |
| MAP/microtubule affinity-regulating kinase 2      | 845   |
| mannose receptor, C type 2                        | 74    |
| zinc finger protein 787                           | 191   |
| heterogeneous nuclear ribonucleoprotein U-like    | 11882 |
| Sp6 transcription factor                          | 5     |
| TLC domain containing 2                           | 107   |
| engulfment and cell motility 1                    | 118   |
| zinc finger protein 585A                          | 77    |
| solute carrier family 38, member 7                | 635   |
| dystrophin related protein 2                      | 5     |
| potassium voltage-gated channel, Shaw-related     | 138   |
| upstream binding transcription factor, RNA pol    | 1090  |
| glycerol-3-phosphate dehydrogenase 1 (soluble)    | 5     |
| KIAA1239                                          | 5     |
| KIAA0513                                          | 5     |
| calcium channel, voltage-dependent, T type, al    | 5     |
| lipin 1                                           | 357   |
| polyamine modulated factor 1 binding protein 1    | 5     |
| G protein-coupled receptor 179                    | 5     |
| nitric oxide synthase 1 (neuronal) adaptor pro    | 5     |
| Sad1 and UNC84 domain containing 2                | 501   |
| FLT3-interacting zinc finger 1                    | 136   |
| zinc finger protein 707                           | 106   |
| cerebellar degeneration-related protein 2-like    | 28    |
| guanine nucleotide binding protein (G protein)    | 1513  |
| GATA binding protein 5                            | 7     |
| CUGBP, Elav-like family member 5                  | 5     |
| cat eye syndrome chromosome region, candidate     | 46    |
| cut-like homeobox 2                               | 15    |
| potassium inwardly-rectifying channel, subfami    | 12    |
| tenascin N                                        | 17    |
| ferric-chelate reductase 1-like                   | 11    |
| synapsin I                                        | 17    |
| calcium binding protein 7                         | 12    |
| filamin B, beta                                   | 467   |

|                                                |      |
|------------------------------------------------|------|
| IQ motif and Sec7 domain 3                     | 5    |
| CREB regulated transcription coactivator 3     | 612  |
| hypermethylated in cancer 1                    | 76   |
| SH3 domain containing ring finger 2            | 53   |
| potassium voltage-gated channel, KQT-like subf | 46   |
| kinase insert domain receptor (a type III rece | 5    |
| chemokine-like receptor 1                      | 5    |
| guanylyl cyclase domain containing 1           | 2990 |
| interleukin 21 receptor                        | 5    |
| zinc finger protein 319                        | 521  |
| FH2 domain containing 1                        | 53   |
| tudor domain containing 10                     | 14   |
| oral cancer overexpressed 1                    | 78   |
| alkaline phosphatase, liver/bone/kidney        | 251  |
| G protein-coupled receptor 63                  | 5    |
| matrix metalloproteinase 11 (stromelysin 3)    | 1719 |
| spinster homolog 2 (Drosophila)                | 7    |
| shadow of prion protein homolog (zebrafish)    | 5    |
| taxilin beta                                   | 5    |
| zinc finger protein 829                        | 103  |
| zinc finger protein 132                        | 31   |
| XK, Kell blood group complex subunit-related f | 5    |
| mahogunin ring finger 1, E3 ubiquitin protein  | 2337 |
| forkhead box I2                                | 5    |
| phosphate cytidyltransferase 2, ethanolamine   | 2340 |
| ArfGAP with RhoGAP domain, ankyrin repeat and  | 253  |
| glycogen synthase 1 (muscle)                   | 100  |
| protocadherin 7                                | 95   |
| N-sulfoglucosamine sulfohydrolase              | 109  |
| ST6 (alpha-N-acetylneuraminyl-2,3-beta-galact  | 178  |
| chromosome 9 open reading frame 9              | 44   |
| SH3-domain binding protein 4                   | 783  |
| UBA-like domain containing 1                   | 41   |
| chromosome 15 open reading frame 53            | 5    |
| leucine rich repeat containing 15              | 12   |
| UDP-Gal:betaGlcNAc beta 1,4- galactosyltransfe | 1000 |
| autophagy related 16-like 2 (S. cerevisiae)    | 16   |
| v-crk avian sarcoma virus CT10 oncogene homolo | 2142 |
| schlafen family member 11                      | 402  |
| ral guanine nucleotide dissociation stimulator | 188  |
| FAT atypical cadherin 3                        | 30   |
| solute carrier family 8 (sodium/calcium exchan | 5    |
| ADAM metalloproteinase domain 33               | 5    |
| dihydrolipoamide S-succinyltransferase (E2 com | 64   |
| syntaphilin                                    | 13   |
| bromodomain containing 4                       | 849  |
| activin A receptor, type IB                    | 3319 |
| zinc finger protein 512B                       | 8    |
| kelch-like family member 30                    | 5    |
| RGP1 retrograde golgi transport homolog (S. ce | 203  |
| kinesin family member 18B                      | 172  |
| IQ motif containing GTPase activating protein  | 7    |
| ADAM metalloproteinase domain 19               | 981  |
| DnaJ (Hsp40) homolog, subfamily B, member 2    | 2187 |

|                                                          |       |
|----------------------------------------------------------|-------|
| oxoglutarate (alpha-ketoglutarate) dehydrogenase         | 672   |
| potassium voltage-gated channel, shaker-related          | 67    |
| low density lipoprotein receptor-related protein         | 152   |
| POU class 3 homeobox 1                                   | 9     |
| NADH dehydrogenase (ubiquinone) 1 alpha subcomplex       | 32826 |
| adenylate cyclase activating polypeptide 1 (pituitary)   | 9     |
| FAD-dependent oxidoreductase domain containing           | 200   |
| nuclear pore associated protein 1                        | 5     |
| MAP-kinase activating death domain                       | 282   |
| regulating synaptic membrane exocytosis 4                | 30    |
| hornerin                                                 | 5     |
| cut-like homeobox 1                                      | 1205  |
| tetraspanin 11                                           | 27    |
| calcium channel, voltage-dependent, L type, alpha 1      | 5     |
| tectonin beta-propeller repeat containing 2              | 109   |
| Clq and tumor necrosis factor related protein            | 74    |
| neuron navigator 3                                       | 277   |
| EPH receptor A10                                         | 11    |
| solute carrier family 30, member 10                      | 66    |
| ankyrin repeat and sterile alpha motif domain            | 21    |
| ecotropic viral integration site 5-like                  | 15    |
| leucine-rich repeats and calponin homology (CH1)         | 399   |
| kinesin family member 3B                                 | 182   |
| KIAA1024                                                 | 5     |
| transmembrane protein 198                                | 80    |
| death effector domain containing 2                       | 32    |
| chromosome 5 open reading frame 20                       | 5     |
| methionine adenosyltransferase I, alpha                  | 19    |
| zinc finger protein 81                                   | 10    |
| RAB36, member RAS oncogene family                        | 7     |
| N-deacetylase/N-sulfotransferase (heparan glucosaminase) | 13660 |
| transcription factor 7 (T-cell specific, HMG-box)        | 883   |
| transglutaminase 2                                       | 731   |
| N(alpha)-acetyltransferase 38, NatC auxiliary            | 458   |
| E1A binding protein p400                                 | 1798  |
| ATPase, class VI, type 11C                               | 590   |
| neuropilin 1                                             | 586   |
| cleavage and polyadenylation specific factor 7           | 1283  |
| Phosphatidylinositol 4-kinase type 2-alpha; Unk          | 1489  |
| aarF domain containing kinase 3                          | 1106  |
| AVL9 homolog (S. cerevisiae)                             | 246   |
| suppressor of Ty 16 homolog (S. cerevisiae)              | 528   |
| mitochondrial calcium uniporter regulator 1              | 129   |
| limb bud and heart development                           | 1956  |
| vitamin D (1,25-dihydroxyvitamin D3) receptor            | 416   |
| PHD finger protein 12                                    | 307   |
| NSFL1 (p97) cofactor (p47)                               | 397   |
| zinc finger and BTB domain containing 34                 | 726   |
| cyclin-dependent kinase 18                               | 262   |
| N-myc downstream regulated 1                             | 2195  |
| synaptotagmin-like 4                                     | 84    |
| GLI family zinc finger 2                                 | 73    |
| carboxypeptidase D                                       | 1766  |
| transient receptor potential cation channel, subfamily   | 68    |

|                                                            |       |
|------------------------------------------------------------|-------|
| microtubule associated monooxygenase, calponin             | 58    |
| leukocyte immunoglobulin-like receptor, subfam             | 5     |
| transmembrane protein 251                                  | 14    |
| phosphoribosylformylglycinamide synthase                   | 901   |
| adaptor-related protein complex 1, mu 1 subuni             | 416   |
| glycerol-3-phosphate acyltransferase, mitochon             | 153   |
| pleckstrin homology domain interacting protein             | 668   |
| neural precursor cell expressed, developmental             | 289   |
| polyhomeotic homolog 3 (Drosophila)                        | 366   |
| contactin 3 (plasmacytoma associated)                      | 27    |
| zinc finger, CCHC domain containing 14                     | 64    |
| metastasis associated 1 family, member 3                   | 194   |
| clathrin interactor 1                                      | 581   |
| cysteinyl leukotriene receptor 2                           | 5     |
| UPF1 regulator of nonsense transcripts homolog             | 513   |
| solute carrier family 7 (cationic amino acid t             | 338   |
| tetratricopeptide repeat domain 28                         | 227   |
| family with sequence similarity 177, member A1             | 765   |
| 1-acylglycerol-3-phosphate O-acyltransferase 3             | 2443  |
| damage-specific DNA binding protein 1, 127kDa              | 22506 |
| kinesin family member 1C                                   | 149   |
| collagen, type I, alpha 1                                  | 73360 |
| zinc finger protein 469                                    | 139   |
| CUB and Sushi multiple domains 2                           | 5     |
| solute carrier family 16 (monocarboxylate tran             | 73    |
| ligand dependent nuclear receptor corepressor              | 94    |
| EPH receptor A6                                            | 19    |
| BCL2-associated athanogene 2                               | 2237  |
| EPM2A (laforin) interacting protein 1                      | 218   |
| transmembrane protein 139                                  | 17    |
| transient receptor potential cation channel, s             | 13    |
| citron (rho-interacting, serine/threonine kina             | 134   |
| collagen, type IV, alpha 6                                 | 37    |
| adrenergic, beta, receptor kinase 2                        | 215   |
| KIN, antigenic determinant of recA protein hom             | 443   |
| translocase of inner mitochondrial membrane 8              | 147   |
| growth differentiation factor 7                            | 27    |
| chromosome 14 open reading frame 37                        | 25    |
| PQ loop repeat containing 1                                | 1060  |
| peptidylprolyl isomerase (cyclophilin)-like 6              | 58    |
| mucolipin 3                                                | 47    |
| T-cell, immune regulator 1, ATPase, H <sup>+</sup> transpo | 2756  |
| mitochondrial ribosomal protein S25                        | 630   |
| thrombospondin 2                                           | 372   |
| fibrillin 2                                                | 167   |
| bifunctional apoptosis regulator                           | 376   |
| solute carrier family 23 (ascorbic acid transp             | 121   |
| selenoprotein N, 1                                         | 104   |
| protein arginine methyltransferase 3                       | 120   |
| myotubularin related protein 7                             | 33    |
| tRNA methyltransferase 2 homolog B (S. cerevis             | 174   |
| glycerate kinase                                           | 3833  |
| F-box and leucine-rich repeat protein 18                   | 92    |
| mannosidase, alpha, class 2A, member 2                     | 340   |

|                                                |      |
|------------------------------------------------|------|
| transmembrane and tetratricopeptide repeat con | 379  |
| fms-related tyrosine kinase 3                  | 15   |
| zinc finger protein 573                        | 12   |
| latrophilin 1                                  | 49   |
| solute carrier family 30 (zinc transporter), m | 204  |
| peroxisomal biogenesis factor 19               | 1804 |
| poly(A) polymerase gamma                       | 49   |
| ladinin 1                                      | 89   |
| lemur tyrosine kinase 2                        | 51   |
| family with sequence similarity 211, member A  | 23   |
| suppressor of cytokine signaling 4             | 336  |
| solute carrier organic anion transporter famil | 133  |
| NADPH dependent diflavin oxidoreductase 1      | 1044 |
| transport and golgi organization 6 homolog (Dr | 143  |
| nucleolar protein with MIF4G domain 1          | 842  |
| chromosome 20 open reading frame 112           | 148  |
| tumor protein p73                              | 831  |
| IBA57, iron-sulfur cluster assembly homolog (S | 66   |
| gamma-aminobutyric acid (GABA) A receptor, the | 14   |
| kazrin, periplakin interacting protein         | 34   |
| aminopeptidase puromycin sensitive             | 2194 |
| zinc finger protein 708                        | 16   |
| transmembrane protein 184B                     | 1362 |
| discoidin, CUB and LCCL domain containing 2    | 798  |
| Rab interacting lysosomal protein-like 1       | 155  |
| cytochrome c oxidase subunit VIIa polypeptide  | 289  |
| SUMO/sentrin specific peptidase family member  | 80   |
| EF-hand calcium binding domain 2               | 204  |
| Rho GTPase activating protein 26               | 131  |
| frizzled family receptor 5                     | 122  |
| solute carrier family 35, member F6            | 272  |
| forkhead box D3                                | 7    |
| ethanolaminophosphotransferase 1 (CDP-ethanola | 449  |
| farnesyltransferase, CAAX box, beta            | 13   |
| diphosphoinositol pentakisphosphate kinase 2   | 203  |
| ubiquitin specific peptidase 49                | 44   |
| SH3 and PX domains 2A                          | 152  |
| suppressor of Ty 3 homolog (S. cerevisiae)     | 175  |
| spla/ryanodine receptor domain and SOCS box co | 419  |
| leukotriene B4 receptor                        | 70   |
| G protein-coupled receptor 107                 | 1429 |
| sperm autoantigenic protein 17                 | 189  |
| myotubularin related protein 12                | 156  |
| gamma-aminobutyric acid (GABA) A receptor, bet | 267  |
| protocadherin 1                                | 30   |
| tumor necrosis factor, alpha-induced protein 8 | 603  |
| related RAS viral (r-ras) oncogene homolog 2   | 57   |
| coiled-coil domain containing 85C              | 86   |
| chromosome 8 open reading frame 59             | 164  |
| extracellular leucine-rich repeat and fibronec | 22   |
| hemopexin                                      | 307  |
| RAB4A, member RAS oncogene family              | 850  |
| myosin IXA                                     | 137  |
| cystathionase (cystathionine gamma-lyase)      | 430  |

|                                                 |      |
|-------------------------------------------------|------|
| nucleolar protein 9                             | 194  |
| transcription elongation factor A (SII), 3      | 128  |
| spectrin, beta, non-erythrocytic 2              | 910  |
| amyloid beta (A4) precursor protein-binding, f  | 704  |
| actin binding LIM protein family, member 3      | 9    |
| solute carrier family 35, member E1             | 4273 |
| protein tyrosine phosphatase, non-receptor typ  | 438  |
| large tumor suppressor kinase 1                 | 176  |
| primase, DNA, polypeptide 1 (49kDa)             | 178  |
| syntaxin 4                                      | 53   |
| Ral GTPase activating protein, alpha subunit 2  | 24   |
| lanosterol synthase (2,3-oxidosqualene-lanoste  | 564  |
| NEDD4 binding protein 3                         | 35   |
| golgi-associated, gamma adaptin ear containing  | 14   |
| BCL2-like 13 (apoptosis facilitator)            | 741  |
| zinc finger, MYND-type containing 8             | 235  |
| membrane-associated ring finger (C3HC4) 4, E3   | 68   |
| GATA binding protein 6                          | 691  |
| aldehyde dehydrogenase 1 family, member L2      | 22   |
| chromosome 4 open reading frame 19              | 51   |
| eukaryotic translation initiation factor 2, su  | 3360 |
| endogenous retrovirus group MER34, member 1     | 28   |
| alpha-kinase 1                                  | 47   |
| low density lipoprotein receptor class A domai  | 314  |
| serpin peptidase inhibitor, clade E (nexin, pl  | 1508 |
| nucleotide-binding oligomerization domain cont  | 31   |
| chromosome 16 open reading frame 52             | 102  |
| zinc finger protein 841                         | 21   |
| chromosome 2 open reading frame 82              | 72   |
| methionyl aminopeptidase 1                      | 887  |
| zinc finger protein 589                         | 20   |
| active BCR-related                              | 58   |
| solute carrier family 33 (acetyl-CoA transport  | 145  |
| TNF receptor-associated factor 5                | 250  |
| nuclear receptor subfamily 1, group H, member   | 99   |
| adenylate cyclase 9                             | 166  |
| spermatid maturation 1                          | 7    |
| prune homolog 2 (Drosophila)                    | 121  |
| F-box protein 11                                | 359  |
| WD repeat domain 7                              | 365  |
| cleavage and polyadenylation specific factor 6  | 5819 |
| chemokine (C-C motif) receptor 6                | 35   |
| fibronectin leucine rich transmembrane protein  | 73   |
| SH3-domain binding protein 2                    | 449  |
| guanine nucleotide binding protein (G protein)  | 47   |
| YOD1 deubiquitinase                             | 55   |
| phospholipase A2, group XVI                     | 2547 |
| protein phosphatase 1, regulatory subunit 3G    | 29   |
| adenylate kinase 2                              | 3125 |
| tripartite motif containing 38                  | 62   |
| family with sequence similarity 19 (chemokine   | 14   |
| cyclin-dependent kinase 13                      | 32   |
| ADAM metallopeptidase with thrombospondin type  | 466  |
| sortilin-related receptor, L (DLR class) A repe | 40   |

|                                                |       |
|------------------------------------------------|-------|
| Zic family member 1                            | 26    |
| chromosome 1 open reading frame 50             | 1217  |
| myosin XVIII A                                 | 159   |
| junctional adhesion molecule 2                 | 41    |
| ectopic P-granules autophagy protein 5 homolog | 269   |
| CNKSR family member 3                          | 567   |
| NHP2 non-histone chromosome protein 2-like 1 ( | 18476 |
| superoxide dismutase 2, mitochondrial          | 993   |
| SWIM-type zinc finger 7 associated protein 1   | 55    |
| polymerase (DNA directed) iota                 | 321   |
| tubulin polymerization promoting protein       | 7     |
| transmembrane protein 53                       | 234   |
| nuclear transcription factor, X-box binding 1  | 215   |
| sushi domain containing 2                      | 16    |
| SWI/SNF related, matrix associated, actin depe | 727   |
| T-cell lymphoma invasion and metastasis 1      | 20    |
| empty spiracles homeobox 1                     | 35    |
| N(alpha)-acetyltransferase 11, NatA catalytic  | 66    |
| Rho guanine nucleotide exchange factor (GEF) 1 | 346   |
| RNA (guanine-7-) methyltransferase             | 64    |
| NOP9 nucleolar protein                         | 353   |
| vacuolar protein sorting 13 homolog A (S. cere | 110   |
| RAB8A, member RAS oncogene family              | 226   |
| family with sequence similarity 168, member A  | 68    |
| fibronectin 1                                  | 1064  |
| ubiquitin specific peptidase 13 (isopeptidase  | 379   |
| myelin expression factor 2                     | 358   |
| UDP-glucose 6-dehydrogenase                    | 735   |
| zinc finger protein 326                        | 162   |
| ankyrin repeat and SOCS box containing 1       | 408   |
| negative regulator of ubiquitin-like proteins  | 85    |
| solute carrier family 24 (sodium/potassium/cal | 5     |
| dopey family member 1                          | 17    |
| heat shock protein 90kDa beta (Grp94), member  | 42    |
| versican                                       | 542   |
| WD repeat domain 41                            | 313   |
| derlin 3                                       | 129   |
| chromosome 9 open reading frame 64             | 126   |
| solute carrier family 38, member 9             | 156   |
| solute carrier family 22 (organic cation trans | 86    |
| small nuclear ribonucleoprotein polypeptide B  | 593   |
| RNA binding motif protein, X-linked 2          | 139   |
| OTU domain containing 7A                       | 35    |
| ATPase, aminophospholipid transporter, class I | 22    |
| coiled-coil domain containing 127              | 615   |
| ubiquitin specific peptidase 30                | 76    |
| glycosyltransferase-like domain containing 1   | 241   |
| Hermansky-Pudlak syndrome 3                    | 60    |
| carbonic anhydrase VIII                        | 197   |
| selenium binding protein 1                     | 173   |
| calcium binding and coiled-coil domain 1       | 68    |
| ALG10, alpha-1,2-glycosyltransferase           | 13    |
| family with sequence similarity 120B           | 764   |
| transmembrane channel-like 7                   | 54    |

|                                                |      |
|------------------------------------------------|------|
| mucin 20, cell surface associated              | 11   |
| insulin-like growth factor binding protein-lik | 13   |
| OTU domain, ubiquitin aldehyde binding 2       | 110  |
| methyltransferase like 8                       | 124  |
| collagen and calcium binding EGF domains 1     | 54   |
| WD repeat domain 3                             | 1166 |
| shroom family member 1                         | 150  |
| N-ethylmaleimide-sensitive factor attachment p | 277  |
| membrane-associated ring finger (C3HC4) 3, E3  | 77   |
| NADH dehydrogenase (ubiquinone) Fe-S protein 1 | 1041 |
| eyes absent homolog 4 (Drosophila)             | 242  |
| signal-regulatory protein alpha                | 1235 |
| cms1 ribosomal small subunit homolog (yeast)   | 423  |
| transmembrane channel-like 8                   | 13   |
| tRNA-yW synthesizing protein 5                 | 148  |
| forkhead box L1                                | 367  |
| ADP-ribosylation factor guanine nucleotide-exc | 111  |
| non imprinted in Prader-Willi/Angelman syndrom | 805  |
| zinc finger protein 248                        | 43   |
| ATP-binding cassette, sub-family G (WHITE), me | 20   |
| slingshot protein phosphatase 3                | 159  |
| X-prolyl aminopeptidase (aminopeptidase P) 3,  | 112  |
| BCL2/adenovirus E1B 19kDa interacting protein  | 191  |
| transportin 3                                  | 30   |
| ATPase, class VI, type 11B                     | 459  |
| monoglyceride lipase                           | 453  |
| IWS1 homolog (S. cerevisiae)                   | 343  |
| NADH dehydrogenase (ubiquinone) 1 alpha subcom | 2249 |
| RE1-silencing transcription factor             | 31   |
| G protein-coupled receptor, family C, group 5, | 341  |
| acid-sensing (proton-gated) ion channel 1      | 111  |
| phosphatidylinositol glycan anchor biosynthesi | 122  |
| zinc finger protein 490                        | 97   |
| polymerase (RNA) I polypeptide A, 194kDa       | 675  |
| runt-related transcription factor 1            | 182  |
| mucolipin 2                                    | 39   |
| late endosomal/lysosomal adaptor, MAPK and MTO | 67   |
| required for meiotic nuclear division 5 homolo | 261  |
| ribosomal modification protein rimK-like famil | 100  |
| ras homolog family member F (in filopodia)     | 399  |
| charged multivesicular body protein 3          | 2466 |
| RALBP1 associated Eps domain containing 2      | 36   |
| synaptotagmin-like 3                           | 16   |
| solute carrier family 12 (potassium/chloride t | 17   |
| translocase of outer mitochondrial membrane 20 | 674  |
| zyg-11 related, cell cycle regulator           | 336  |
| TATA box binding protein (TBP)-associated fact | 214  |
| chromosome 19 open reading frame 40            | 129  |
| karyopherin alpha 3 (importin alpha 4)         | 104  |
| maestro                                        | 11   |
| WD repeat and FYVE domain containing 2         | 85   |
| 2,4-dienoyl CoA reductase 1, mitochondrial     | 131  |
| myristoylated alanine-rich protein kinase C su | 188  |
| polymerase (DNA directed), mu                  | 45   |



|                                                |      |
|------------------------------------------------|------|
| latent transforming growth factor beta binding | 1616 |
| guanine nucleotide binding protein (G protein) | 343  |
| Myb/SANT-like DNA-binding domain containing 3  | 78   |
| dicer 1, ribonuclease type III                 | 25   |
| enhancer of polycomb homolog 1 (Drosophila)    | 102  |
| plexin A3                                      | 2992 |
| potassium channel tetramerization domain conta | 88   |
| solute carrier family 30 (zinc transporter), m | 5    |
| TBC1 domain family, member 24                  | 269  |
| Usher syndrome 1G (autosomal recessive)        | 5    |
| myosin, heavy chain 15                         | 5    |
| RNF103-CHMP3 readthrough                       | 2466 |
| interleukin 17 receptor E-like                 | 5    |
| cell division cycle 14B                        | 2    |
| RAB37, member RAS oncogene family              | 875  |
| activating transcription factor 3              | 2704 |
| dystonin                                       | 439  |
| schlafen family member 13                      | 11   |
| coiled-coil domain containing 170              | 15   |
| ADAM metallopeptidase with thrombospondin type | 18   |
| contactin 2 (axonal)                           | 5    |
| WEE1 homolog (S. pombe)                        | 331  |
| CUGBP, Elav-like family member 6               | 5    |
| microtubule-associated protein tau             | 11   |
| family with sequence similarity 189, member A1 | 12   |
| septin 8                                       | 199  |
| TBC1 domain family, member 10A                 | 184  |
| bromodomain adjacent to zinc finger domain, 1B | 40   |
| junctionophilin 2                              | 76   |
| platelet-derived growth factor receptor, beta  | 320  |
| mitogen-activated protein kinase binding prote | 36   |
| matrix metallopeptidase 14 (membrane-inserted) | 276  |
| RUN and FYVE domain containing 4               | 5    |
| zinc finger protein 618                        | 778  |
| beta 1,3-galactosyltransferase-like            | 200  |
| NMDA receptor synaptonuclear signaling and neu | 507  |
| zinc finger protein 324                        | 82   |
| VANGL planar cell polarity protein 1           | 721  |
| tubulin, gamma complex associated protein 4    | 129  |
| 5'-nucleotidase domain containing 1            | 127  |
| histone cluster 1, H2ah                        | 22   |
| endonuclease/exonuclease/phosphatase family do | 39   |
| Smith-Magenis syndrome chromosome region, cand | 219  |
| epithelial membrane protein 2                  | 1725 |
| homeobox D12                                   | 6    |
| caspase 10, apoptosis-related cysteine peptida | 55   |
| X-ray repair complementing defective repair in | 86   |
| TBC1 domain family, member 8B (with GRAM domai | 69   |
| transcription termination factor, RNA polymera | 837  |
| pygopus homolog 1 (Drosophila)                 | 104  |
| cordon-bleu WH2 repeat protein-like 1          | 70   |
| acid phosphatase-like 2                        | 72   |
| tankyrase, TRF1-interacting ankyrin-related AD | 205  |
| tRNA selenocysteine 1 associated protein 1     | 763  |

|                                                |      |
|------------------------------------------------|------|
| diacylglycerol kinase, iota                    | 16   |
| collagen, type V, alpha 1                      | 3111 |
| transmembrane protein 167A                     | 1029 |
| epithelial membrane protein 1                  | 814  |
| adenosine deaminase, RNA-specific, B2 (non-fun | 9    |
| DENN/MADD domain containing 5B                 | 832  |
| StAR-related lipid transfer (START) domain con | 28   |
| MHC class I polypeptide-related sequence A     | 742  |
| developmentally regulated GTP binding protein  | 1478 |
| nanos homolog 1 (Drosophila)                   | 158  |
| ubiquinol-cytochrome c reductase, Rieske iron- | 59   |
| frizzled-related protein                       | 43   |
| TRAF2 and NCK interacting kinase               | 106  |
| fatty acid desaturase 1                        | 1170 |
| RAN binding protein 3                          | 908  |
| transmembrane emp24-like trafficking protein 1 | 1753 |
| KIAA0368                                       | 57   |
| CHURC1-FNTB readthrough                        | 13   |
| DnaJ (Hsp40) homolog, subfamily B, member 13   | 7    |
| exocyst complex component 2                    | 192  |
| adenosine deaminase, RNA-specific, B1          | 860  |
| solute carrier family 25 (mitochondrial iron t | 145  |
| adaptor-related protein complex 4, mu 1 subuni | 163  |
| syntaxin 17                                    | 510  |
| ER membrane protein complex subunit 3          | 4423 |
| centromere protein P                           | 85   |
| ST3 beta-galactoside alpha-2,3-sialyltransfera | 59   |
| protein phosphatase 5, catalytic subunit       | 973  |
| solute carrier family 11 (proton-coupled dival | 526  |
| mitochondrial ribosomal protein S14            | 2140 |
| ubiquinol-cytochrome c reductase binding prote | 1173 |
| polypyrimidine tract binding protein 2         | 70   |
| cell division cycle 6                          | 772  |
| polymerase (DNA directed), epsilon, catalytic  | 238  |
| thymidine kinase 2, mitochondrial              | 439  |
| major facilitator superfamily domain containin | 47   |
| inositol hexakisphosphate kinase 1             | 406  |
| raftlin family member 2                        | 21   |
| Ephrin-A3; Uncharacterized protein; cDNA FLJ57 | 9    |
| calcineurin-like phosphoesterase domain contai | 511  |
| PET112 homolog (yeast)                         | 1036 |
| coiled-coil domain containing 153              | 46   |
| bicaudal D homolog 2 (Drosophila)              | 38   |
| G patch domain containing 4                    | 715  |
| oxysterol binding protein-like 8               | 141  |
| cytochrome c oxidase assembly factor 5         | 72   |
| FK506 binding protein 7                        | 645  |
| ATP-binding cassette, sub-family G (WHITE), me | 197  |
| inhibitor of growth family, member 2           | 193  |
| ANKH inorganic pyrophosphate transport regulat | 770  |
| chromosome 8 open reading frame 46             | 6    |
| adenosine deaminase-like                       | 105  |
| lectin, mannose-binding 2-like                 | 355  |
| ubiquitin-conjugating enzyme E2 variant 2      | 1770 |

|                                                |      |
|------------------------------------------------|------|
| antigen identified by monoclonal antibody Ki-6 | 468  |
| trafficking protein particle complex 2-like    | 1619 |
| PAP associated domain containing 5             | 152  |
| chromosome 22 open reading frame 29            | 351  |
| phosphatidylinositol transfer protein, cytopla | 797  |
| TraB domain containing 2B                      | 244  |
| RAS protein activator like 2                   | 950  |
| mitochondrial ribosomal protein L46            | 95   |
| Rap guanine nucleotide exchange factor (GEF) 3 | 19   |
| trophoblast glycoprotein                       | 170  |
| FERM domain containing 4A                      | 192  |
| ubiquitin protein ligase E3 component n-recogn | 733  |
| tumor suppressor candidate 2                   | 611  |
| EH-domain containing 1                         | 335  |
| roundabout, axon guidance receptor, homolog 2  | 22   |
| Rho-associated, coiled-coil containing protein | 142  |
| SLIT-ROBO Rho GTPase activating protein 3      | 38   |
| zinc finger protein 180                        | 195  |
| fibrinogen C domain containing 1               | 44   |
| ATP/GTP binding protein-like 3                 | 148  |
| karyopherin (importin) beta 1                  | 465  |
| sterol O-acyltransferase 1                     | 654  |
| GLIS family zinc finger 3                      | 47   |
| DEAD (Asp-Glu-Ala-Asp) box polypeptide 52      | 865  |
| RAN binding protein 2                          | 814  |
| zinc finger protein 695                        | 123  |
| poly (ADP-ribose) glycohydrolase               | 445  |
| nerve growth factor receptor (TNFRSF16) associ | 114  |
| ST3 beta-galactoside alpha-2,3-sialyltransfera | 150  |
| ubiquitin-conjugating enzyme E2A               | 618  |
| pyruvate kinase, liver and RBC                 | 112  |
| anoctamin 7                                    | 79   |
| small integral membrane protein 1              | 309  |
| chromosome 6 open reading frame 211            | 65   |
| phosphoribosyl pyrophosphate synthetase-associ | 2649 |
| pleckstrin homology domain containing, family  | 97   |
| uridine monophosphate synthetase               | 374  |
| BUB1 mitotic checkpoint serine/threonine kinas | 515  |
| zinc finger protein 827                        | 17   |
| mitochondrial ribosomal protein L30            | 246  |
| chromosome 2 open reading frame 15             | 246  |
| DnaJ (Hsp40) homolog, subfamily B, member 5    | 379  |
| methyl-CpG binding domain protein 5            | 7    |
| zinc finger, DHHC-type containing 24           | 304  |
| suppressor of cytokine signaling 7             | 15   |
| ligand of numb-protein X 1, E3 ubiquitin prote | 156  |
| steroid 5 alpha-reductase 3                    | 402  |
| Snf2-related CREBBP activator protein          | 643  |
| RAB3 GTPase activating protein subunit 2 (non- | 461  |
| survival motor neuron domain containing 1      | 949  |
| slit homolog 1 (Drosophila)                    | 15   |
| AT rich interactive domain 1B (SWI1-like)      | 220  |
| solute carrier family 44 (choline transporter) | 407  |
| WD repeat and SOCS box containing 2            | 938  |

|                                                   |      |
|---------------------------------------------------|------|
| propionyl CoA carboxylase, beta polypeptide       | 379  |
| solute carrier family 30 (zinc transporter), m    | 396  |
| zinc finger protein 283                           | 194  |
| ESF1, nucleolar pre-rRNA processing protein, h    | 180  |
| mitochondrial ribosomal protein S30               | 4883 |
| zinc finger protein 622                           | 145  |
| family with sequence similarity 105, member A     | 2613 |
| dual-specificity tyrosine-(Y)-phosphorylation     | 1091 |
| MAD2 mitotic arrest deficient-like 1 (yeast)      | 3013 |
| chromosome 15 open reading frame 40               | 133  |
| lysophosphatidic acid receptor 2                  | 45   |
| TRAF-interacting protein with forkhead-associ     | 400  |
| family with sequence similarity 227, member A     | 16   |
| ATP-binding cassette, sub-family B (MDR/TAP),     | 161  |
| splicing factor, suppressor of white-apricot h    | 134  |
| Ca <sup>++</sup> -dependent secretion activator 2 | 100  |
| THUMP domain containing 2                         | 700  |
| transmembrane 9 superfamily member 3              | 1030 |
| family with sequence similarity 126, member A     | 241  |
| guanine nucleotide binding protein (G protein)    | 92   |
| tsukushi, small leucine rich proteoglycan         | 293  |
| cleavage stimulation factor, 3' pre-RNA, subun    | 3550 |
| serine incorporator 1                             | 2408 |
| lipoyl(octanoyl) transferase 2 (putative)         | 198  |
| galactosylceramidase                              | 94   |
| histone acetyltransferase 1                       | 3017 |
| chromodomain helicase DNA binding protein 1       | 35   |
| homeobox B13                                      | 80   |
| RAB3B, member RAS oncogene family                 | 611  |
| histone deacetylase 5                             | 266  |
| activating signal cointegrator 1 complex subun    | 159  |
| plakophilin 4                                     | 373  |
| UDP-Gal:betaGlcNAc beta 1,3-galactosyltransfer    | 35   |
| golgi glycoprotein 1                              | 2175 |
| chromosome 11 open reading frame 1                | 18   |
| UV radiation resistance associated                | 116  |
| coiled-coil domain containing 93                  | 395  |
| collagen beta(1-0)galactosyltransferase 2         | 70   |
| serum response factor binding protein 1           | 102  |
| killer cell lectin-like receptor subfamily G,     | 18   |
| testis expressed 2                                | 127  |
| tumor necrosis factor receptor superfamily, me    | 36   |
| beta-transducin repeat containing E3 ubiquitin    | 96   |
| argonaute RISC catalytic component 3              | 198  |
| glutamate dehydrogenase 1                         | 287  |
| BRCA1/BRCA2-containing complex, subunit 3         | 14   |
| activating transcription factor 6                 | 382  |
| tetraspanin 31                                    | 72   |
| dual-specificity tyrosine-(Y)-phosphorylation     | 173  |
| neuropeptide Y receptor Y4                        | 10   |
| zinc finger protein 223                           | 180  |
| TOX high mobility group box family member 3       | 59   |
| DEAD (Asp-Glu-Ala-Asp) box helicase 6             | 11   |
| ariadne RBR E3 ubiquitin protein ligase 1         | 671  |

|                                                |       |
|------------------------------------------------|-------|
| CD248 molecule, endosialin                     | 439   |
| STAM binding protein-like 1                    | 675   |
| solute carrier family 27 (fatty acid transport | 523   |
| PERP, TP53 apoptosis effector                  | 437   |
| GDNF family receptor alpha 1                   | 69    |
| suppression of tumorigenicity 5                | 139   |
| quinolinate phosphoribosyltransferase          | 1165  |
| lipase, endothelial                            | 40    |
| opsin 3                                        | 208   |
| leiomodulin 1 (smooth muscle)                  | 148   |
| HHIP-like 1                                    | 29    |
| pyridoxamine 5'-phosphate oxidase              | 583   |
| inositol polyphosphate-4-phosphatase, type I,  | 387   |
| EF-hand domain (C-terminal) containing 1       | 61    |
| ubiquitin-conjugating enzyme E2D 3             | 2312  |
| zinc finger protein 613                        | 131   |
| exonuclease 1                                  | 1028  |
| family with sequence similarity 179, member A  | 21    |
| transmembrane protein with EGF-like and two fo | 179   |
| nudix (nucleoside diphosphate linked moiety X) | 325   |
| kelch-like family member 4                     | 58    |
| HERPUD family member 2                         | 30    |
| Cdk5 and Abl enzyme substrate 1                | 341   |
| prohibitin 2                                   | 120   |
| general transcription factor IIA, 2, 12kDa     | 1068  |
| cytochrome c oxidase assembly homolog 15 (yeas | 984   |
| 5-azacytidine induced 2                        | 530   |
| nuclear factor I/X (CCAAT-binding transcrip    | 24    |
| heterogeneous nuclear ribonucleoprotein A3     | 329   |
| PHD finger protein 5A                          | 317   |
| C7orf55-LUC7L2 readthrough                     | 419   |
| cytohesin 2                                    | 383   |
| tubulin tyrosine ligase-like family, member 1  | 125   |
| family with sequence similarity 149, member B1 | 33    |
| leucine rich repeat containing 27              | 68    |
| arginine/serine-rich coiled-coil 2             | 320   |
| ADP-ribosylation factor-like 1                 | 600   |
| zinc finger and BTB domain containing 11       | 179   |
| annexin A6                                     | 10462 |
| cell adhesion molecule 1                       | 676   |
| tRNA methyltransferase 10 homolog C (S. cerevi | 655   |
| syndecan 3                                     | 34    |
| cholinergic receptor, muscarinic 3             | 47    |
| N-acetylglutamate synthase                     | 562   |
| EH-domain containing 4                         | 515   |
| CCR4-NOT transcription complex, subunit 6-like | 23    |
| zinc finger protein 639                        | 614   |
| syntaxin 3                                     | 564   |
| SRY (sex determining region Y)-box 11          | 1100  |
| potassium channel, subfamily K, member 1       | 410   |
| NSL1, MIS12 kinetochore complex component      | 180   |
| cytochrome P450, family 4, subfamily F, polype | 1613  |
| zinc finger, FYVE domain containing 9          | 32    |
| ets variant 1                                  | 160   |

|                                                                       |       |
|-----------------------------------------------------------------------|-------|
| ALG14, UDP-N-acetylglucosaminyltransferase sub                        | 572   |
| pyridoxal (pyridoxine, vitamin B6) kinase                             | 5653  |
| proteasome (prosome, macropain) assembly chape                        | 1452  |
| ribosomal protein L13                                                 | 46038 |
| sorbin and SH3 domain containing 3                                    | 1126  |
| Mitogen-activated protein kinase kinase kinase                        | 734   |
| transmembrane emp24 protein transport domain c                        | 1571  |
| v-ets avian erythroblastosis virus E26 oncogen                        | 3965  |
| tubulin polyglutamylase complex subunit 2                             | 508   |
| adenomatous polyposis coli                                            | 794   |
| component of oligomeric golgi complex 6                               | 122   |
| atonal homolog 8 (Drosophila)                                         | 21    |
| BMP and activin membrane-bound inhibitor                              | 515   |
| SH3-domain GRB2-like (endophilin) interacting                         | 180   |
| low density lipoprotein receptor-related prote                        | 378   |
| LUC7-like 2 (S. cerevisiae)                                           | 419   |
| mediator complex subunit 6                                            | 776   |
| RAB24, member RAS oncogene family                                     | 908   |
| small nuclear ribonucleoprotein polypeptide G                         | 163   |
| Zinc finger protein 177                                               | 36    |
| RAS p21 protein activator (GTPase activating p                        | 1700  |
| protein phosphatase, Mg <sup>2+</sup> /Mn <sup>2+</sup> dependent, 1H | 45    |
| scavenger receptor class B, member 2                                  | 5609  |
| polymerase (RNA) I polypeptide E, 53kDa                               | 540   |
| v-ets avian erythroblastosis virus E26 oncogen                        | 184   |
| ribonuclease T2                                                       | 214   |
| catenin, beta like 1                                                  | 206   |
| dynactin 6                                                            | 745   |
| hydroxyacyl-CoA dehydrogenase/3-ketoacyl-CoA t                        | 525   |
| intraflagellar transport 57 homolog (Chlamydom                        | 214   |
| heat shock 70kDa protein 2                                            | 600   |
| mutS homolog 5                                                        | 661   |
| centrosomal protein 72kDa                                             | 230   |
| tetraspanin 14                                                        | 239   |
| CDP-diacylglycerol synthase (phosphatidate cyt                        | 782   |
| 0-6-methylguanine-DNA methyltransferase                               | 2473  |
| coiled-coil domain containing 77                                      | 8     |
| nucleoside-triphosphatase, cancer-related                             | 2755  |
| RNA binding motif protein 15B                                         | 1925  |
| hypermethylated in cancer 2                                           | 28    |
| deoxynucleotidyltransferase, terminal, interac                        | 599   |
| RAB6B, member RAS oncogene family                                     | 669   |
| SH3-domain GRB2-like endophilin B1                                    | 3418  |
| smu-1 suppressor of mec-8 and unc-52 homolog (                        | 325   |
| zinc finger, CCHC domain containing 11                                | 97    |
| torsin A interacting protein 2                                        | 569   |
| EH-domain containing 3                                                | 206   |
| centromere protein F, 350/400kDa                                      | 181   |
| RAB40B, member RAS oncogene family                                    | 495   |
| ceroid-lipofuscinosis, neuronal 8 (epilepsy, p                        | 122   |
| ankyrin repeat and sterile alpha motif domain                         | 98    |
| HAUS augmin-like complex, subunit 3                                   | 466   |
| spire-type actin nucleation factor 1                                  | 103   |
| eukaryotic translation initiation factor 2B, s                        | 789   |

|                                                            |      |
|------------------------------------------------------------|------|
| notchless homolog 1 ( <i>Drosophila</i> )                  | 526  |
| vacuolar protein sorting 33 homolog A ( <i>S. cere</i> )   | 282  |
| Rho GTPase activating protein 29                           | 451  |
| peptidase (mitochondrial processing) beta                  | 653  |
| KH and NYN domain containing                               | 421  |
| zinc finger and BTB domain containing 3                    | 96   |
| microtubule associated serine/threonine kinase             | 1084 |
| translocase of outer mitochondrial membrane 40             | 14   |
| peroxisome proliferator-activated receptor gamma           | 861  |
| calpain 2, (m/II) large subunit                            | 1090 |
| chondroitin sulfate synthase 1                             | 200  |
| KIAA0141                                                   | 1078 |
| calcium/calmodulin-dependent serine protein kinase         | 892  |
| RAB32, member RAS oncogene family                          | 1894 |
| CCHC-type zinc finger, nucleic acid binding protein        | 2257 |
| mannosyl (alpha-1,3-)-glycoprotein beta-1,2-N-             | 831  |
| mitogen-activated protein kinase-activated protein         | 573  |
| lymphoid enhancer-binding factor 1                         | 104  |
| peptidylprolyl isomerase (cyclophilin)-like 4              | 1565 |
| abhydrolase domain containing 5                            | 884  |
| protein inhibitor of activated STAT, 2                     | 194  |
| protocadherin beta 2                                       | 199  |
| amyloid beta (A4) precursor-like protein 2                 | 5552 |
| tRNA methyltransferase 61 homolog A ( <i>S. cerevisi</i> ) | 296  |
| cartilage associated protein                               | 3154 |
| G protein-coupled receptor kinase 5                        | 337  |
| methyltransferase like 10                                  | 919  |
| zinc finger CCCH-type containing 14                        | 395  |
| jumping translocation breakpoint                           | 872  |
| retinoic acid receptor, alpha                              | 560  |
| mesoderm development candidate 2                           | 1433 |
| heat shock factor binding protein 1                        | 3000 |
| eukaryotic translation initiation factor 1B                | 1106 |
| zinc finger and BTB domain containing 17                   | 136  |
| transmembrane protein 220                                  | 143  |
| solute carrier family 2 (facilitated glucose transporter)  | 136  |
| thyroid hormone receptor interactor 4                      | 143  |
| carbonic anhydrase VB, mitochondrial                       | 245  |
| RNA binding motif protein 18                               | 963  |
| COX20 cytochrome C oxidase assembly factor                 | 693  |
| TIA1 cytotoxic granule-associated RNA binding              | 1342 |
| SET and MYND domain containing 2                           | 1381 |
| zinc finger protein 749                                    | 69   |
| DNA-damage inducible 1 homolog 2 ( <i>S. cerevisia</i> )   | 357  |
| glyoxylate reductase/hydroxypyruvate reductase             | 572  |
| YTH domain containing 1                                    | 307  |
| minichromosome maintenance complex component 1             | 838  |
| cytochrome b5 reductase 1                                  | 545  |
| lectin, mannose-binding, 1                                 | 2293 |
| chromosome 4 open reading frame 32                         | 325  |
| metallothionein-like 5, testis-specific (tesmin)           | 30   |
| zinc finger and BTB domain containing 20                   | 5    |
| kelch-like family member 5                                 | 366  |
| forkhead box N3                                            | 42   |

|                                                                |      |
|----------------------------------------------------------------|------|
| calcium regulated heat stable protein 1, 24kDa                 | 113  |
| chromosome 19 open reading frame 47                            | 94   |
| V-set and transmembrane domain containing 4                    | 59   |
| talin 2                                                        | 371  |
| FK506 binding protein 4, 59kDa                                 | 727  |
| Rho GTPase activating protein 18                               | 176  |
| pannexin 1                                                     | 576  |
| ubiquitin-conjugating enzyme E2T (putative)                    | 679  |
| hairy/enhancer-of-split related with YRPW motif                | 70   |
| general transcription factor IIF, polypeptide                  | 1014 |
| centromere protein M                                           | 68   |
| myeloid/lymphoid or mixed-lineage leukemia (transmembrane)     | 385  |
| zinc finger protein 446                                        | 44   |
| chromosome 12 open reading frame 52                            | 1319 |
| spermatid perinuclear RNA binding protein                      | 575  |
| PQ loop repeat containing 2                                    | 94   |
| tyrosyl-tRNA synthetase 2, mitochondrial                       | 192  |
| ubiquitin D                                                    | 112  |
| BTB (POZ) domain containing 1                                  | 84   |
| zinc finger and SCAN domain containing 2                       | 125  |
| CCR4-NOT transcription complex, subunit 7                      | 415  |
| peptidase (mitochondrial processing) alpha                     | 105  |
| centrosomal protein 63kDa                                      | 191  |
| rhomboid, veinlet-like 3 (Drosophila)                          | 100  |
| TRAF3 interacting protein 2                                    | 44   |
| mitochondrial ribosomal protein L2                             | 935  |
| exonuclease 3'-5' domain containing 2                          | 3135 |
| methylenetetrahydrofolate dehydrogenase (NADP+ dependent)      | 4677 |
| ADP-ribosylation factor-like 3                                 | 1387 |
| proteasome (prosome, macropain) subunit, beta                  | 156  |
| G protein-coupled receptor 124                                 | 72   |
| hypoxia inducible factor 1, alpha subunit (basic)              | 1955 |
| hyaluronan synthase 2                                          | 398  |
| MAGI family member, X-linked                                   | 118  |
| zinc finger protein 736                                        | 36   |
| T-cell leukemia homeobox 1                                     | 47   |
| Opa interacting protein 5                                      | 178  |
| thyroid hormone receptor interactor 13                         | 3078 |
| integrin, alpha 11                                             | 390  |
| inverted formin, FH2 and WH2 domain containing                 | 484  |
| mesoderm posterior 1 homolog (mouse)                           | 303  |
| translocase of outer mitochondrial membrane 6                  | 2735 |
| signal-induced proliferation-associated 1 like                 | 291  |
| bromodomain containing 3                                       | 77   |
| migration and invasion inhibitory protein                      | 782  |
| adenylosuccinate lyase                                         | 2319 |
| cytoskeleton-associated protein 4                              | 1923 |
| AT rich interactive domain 2 (ARID, RFX-like)                  | 891  |
| nucleoporin like 2                                             | 1714 |
| FAST kinase domains 2                                          | 579  |
| prostaglandin-endoperoxide synthase 1 (prostaglandin synthase) | 399  |
| aspartyl aminopeptidase                                        | 710  |
| ankyrin repeat domain 9                                        | 766  |
| very low density lipoprotein receptor                          | 977  |



|                                                |       |
|------------------------------------------------|-------|
| integrin, beta 5                               | 3180  |
| HCG1981372, isoform CRA_c; Uncharacterized pro | 142   |
| ribonuclease P/MRP 30kDa subunit               | 494   |
| methionine sulfoxide reductase B1              | 2102  |
| forkhead box E1 (thyroid transcription factor  | 497   |
| Rho GTPase activating protein 20               | 85    |
| phosphoglycerate kinase 1                      | 7680  |
| EBNA1 binding protein 2                        | 930   |
| forkhead box D1                                | 423   |
| shugoshin-like 1 (S. pombe)                    | 766   |
| ubiquitin specific peptidase 9, X-linked       | 2433  |
| dishevelled segment polarity protein 3         | 373   |
| msh homeobox 2                                 | 316   |
| ring finger protein 214                        | 271   |
| VAMP (vesicle-associated membrane protein)-ass | 2926  |
| mediator complex subunit 16                    | 3677  |
| POU class 4 homeobox 1                         | 61    |
| ubiquitin specific peptidase 3                 | 583   |
| thymidylate synthetase                         | 21261 |
| coiled-coil domain containing 59               | 140   |
| kinetochore-localized astrin/SPAG5 binding pro | 1628  |
| isoamyl acetate-hydrolyzing esterase 1 homolog | 553   |
| contactin associated protein-like 5            | 5     |
| cyclin M2                                      | 517   |
| acid phosphatase 6, lysophosphatidic           | 657   |
| myocyte enhancer factor 2C                     | 70    |
| centrin, EF-hand protein, 3                    | 498   |
| p21 protein (Cdc42/Rac)-activated kinase 4     | 130   |
| solute carrier family 43 (amino acid system L  | 68    |
| vacuolar protein sorting 18 homolog (S. cerevi | 295   |
| WD repeat domain 37                            | 107   |
| Rtf1, Paf1/RNA polymerase II complex component | 1869  |
| squamous cell carcinoma antigen recognized by  | 469   |
| methyltransferase like 22                      | 553   |
| tigger transposable element derived 6          | 155   |
| BCL2-associated athanogene                     | 8934  |
| carboxymethylenebutenolidase homolog (Pseudomo | 2602  |
| phospholipase A2, group X1IA                   | 214   |
| vesicle (multivesicular body) trafficking 1    | 1424  |
| ADP-ribosylation factor-like 14 effector prote | 164   |
| oligonucleotide/oligosaccharide-binding fold c | 184   |
| inhibitor of DNA binding 3, dominant negative  | 1295  |
| signal sequence receptor, alpha                | 12917 |
| pleckstrin homology domain containing, family  | 106   |
| ribosomal RNA processing 1                     | 1000  |
| glutathione S-transferase mu 3 (brain)         | 1071  |
| mannosyl (alpha-1,6-)-glycoprotein beta-1,2-N- | 1470  |
| COX assembly mitochondrial protein 1 homolog ( | 1203  |
| serine/threonine kinase 16                     | 1416  |
| upregulator of cell proliferation              | 180   |
| ankyrin repeat and LEM domain containing 2     | 504   |
| fucosyltransferase 10 (alpha (1,3) fucosyltran | 124   |
| alpha-methylacyl-CoA racemase                  | 308   |
| presenilin associated, rhomboid-like           | 1214  |

|                                                  |       |
|--------------------------------------------------|-------|
| mitochondrial ribosome-associated GTPase 2       | 509   |
| WD repeat domain, phosphoinositide interacting   | 1038  |
| aldo-keto reductase family 7, member A2 (aflat   | 1134  |
| polymerase (RNA) II (DNA directed) polypeptide   | 223   |
| cadherin 11, type 2, OB-cadherin (osteoblast)    | 448   |
| ATP-binding cassette, sub-family G (WHITE), me   | 64    |
| uroporphyrinogen III synthase                    | 221   |
| zinc finger, matrin-type 2                       | 1926  |
| N-acetyltransferase 10 (GCN5-related)            | 132   |
| lon peptidase 2, peroxisomal                     | 1004  |
| HAUS augmin-like complex, subunit 8              | 827   |
| cholinergic receptor, nicotinic, alpha 5 (neur   | 903   |
| POU class 6 homeobox 1                           | 135   |
| progesterin and adipoQ receptor family member II | 217   |
| peroxisomal biogenesis factor 7                  | 661   |
| synaptosomal-associated protein, 47kDa           | 7416  |
| hexamethylene bis-acetamide inducible 2          | 306   |
| transmembrane emp24 protein transport domain c   | 12499 |
| ubiquitin-conjugating enzyme E2F (putative)      | 905   |
| melanophilin                                     | 85    |
| DNL-type zinc finger                             | 373   |
| glutamate receptor, ionotropic, delta 1          | 45    |
| NADH dehydrogenase (ubiquinone) flavoprotein 3   | 1449  |
| G patch domain and KOW motifs                    | 420   |
| gamma-aminobutyric acid (GABA) A receptor, bet   | 5     |
| kinocilin                                        | 5     |
| CSE1 chromosome segregation 1-like (yeast)       | 96    |
| squamous cell carcinoma antigen recognized by    | 94    |
| nudix (nucleoside diphosphate linked moiety X)   | 629   |
| lamin B2                                         | 89    |
| guanine nucleotide binding protein (G protein)   | 10881 |
| chromosome 2 open reading frame 68               | 565   |
| paired box 6                                     | 191   |
| mitogen-activated protein kinase 14              | 1191  |
| 1-acylglycerol-3-phosphate O-acyltransferase 6   | 474   |
| transmembrane protein 98                         | 98    |
| transcription factor 21                          | 552   |
| calmodulin-like 4                                | 307   |
| thioredoxin reductase 3                          | 272   |
| splicing factor 3b, subunit 3, 130kDa            | 2541  |
| NCK-associated protein 1                         | 700   |
| dedicator of cytokinesis 7                       | 66    |
| DEAH (Asp-Glu-Ala-His) box polypeptide 34        | 469   |
| phosphofurin acidic cluster sorting protein 2    | 234   |
| thioredoxin-like 1                               | 1779  |
| mutS homolog 3                                   | 443   |
| fat mass and obesity associated                  | 240   |
| chromosome 3 open reading frame 17               | 460   |
| transcription elongation factor B (SIII), poly   | 3007  |
| CD59 molecule, complement regulatory protein     | 19017 |
| gem (nuclear organelle) associated protein 4     | 339   |
| AHA1, activator of heat shock 90kDa protein AT   | 820   |
| mortality factor 4 like 1                        | 1137  |
| inositol(myo)-1(or 4)-monophosphatase 1          | 309   |

|                                                          |      |
|----------------------------------------------------------|------|
| outer dense fiber of sperm tails 2-like                  | 149  |
| calcium/calmodulin-dependent protein kinase II           | 6631 |
| serpin peptidase inhibitor, clade A (alpha-1 a           | 203  |
| diacylglycerol O-acyltransferase 1                       | 3108 |
| crooked neck pre-mRNA splicing factor 1                  | 519  |
| asparaginyl-tRNA synthetase                              | 467  |
| thioredoxin-related transmembrane protein 1              | 3176 |
| mediator complex subunit 31                              | 1743 |
| dual specificity phosphatase 6                           | 1056 |
| transferrin                                              | 2533 |
| F-box protein 33                                         | 306  |
| H6 family homeobox 1                                     | 171  |
| bioorientation of chromosomes in cell division           | 1465 |
| G-rich RNA sequence binding factor 1                     | 4414 |
| ATP/GTP binding protein-like 5                           | 354  |
| cAMP responsive element binding protein-like 2           | 218  |
| solute carrier family 35, member E3                      | 250  |
| GTPase, IMAP family member 6                             | 5    |
| ATPase, Ca <sup>++</sup> transporting, plasma membrane 2 | 170  |
| transmembrane protein 67                                 | 219  |
| neuropilin (NRP) and tolloid (TLL)-like 2                | 723  |
| PAP associated domain containing 4                       | 434  |
| inositol 1,3,4,5,6-pentakisphosphate 2-kinase            | 211  |
| IQ motif containing GTPase activating protein            | 588  |
| isoleucyl-tRNA synthetase 2, mitochondrial               | 2978 |
| brain and reproductive organ-expressed (TNFRSF           | 880  |
| proline-rich nuclear receptor coactivator 1              | 413  |
| phosphatidylserine synthase 2                            | 1031 |
| growth hormone secretagogue receptor                     | 5    |
| RFT1 homolog ( <i>S. cerevisiae</i> )                    | 392  |
| transformer 2 beta homolog ( <i>Drosophila</i> )         | 1868 |
| enabled homolog ( <i>Drosophila</i> )                    | 415  |
| ring finger protein 213                                  | 630  |
| tripartite motif containing 11                           | 727  |
| cysteine and histidine-rich domain (CHORD) con           | 891  |
| polycystic kidney and hepatic disease 1 (autos           | 5    |
| ATP/GTP binding protein 1                                | 187  |
| RAN binding protein 6                                    | 117  |
| heterogeneous nuclear ribonucleoprotein L-like           | 753  |
| nibrin                                                   | 342  |
| staufen double-stranded RNA binding protein 2            | 306  |
|                                                          | 5    |
| fragile site, folic acid type, rare, fra(10) (q          | 289  |
| mitochondrial ribosomal protein S23                      | 7140 |
| olfactory receptor, family 7, subfamily A, mem           | 5    |
| glycogen synthase kinase 3 beta                          | 498  |
| cathepsin V                                              | 601  |
| tRNA 5-methylaminomethyl-2-thiouridylate methy           | 150  |
| YLP motif containing 1                                   | 1542 |
| N-acetylglucosamine-1-phosphate transferase, g           | 677  |
| fucosyltransferase 4 (alpha (1,3) fucosyltrans           | 354  |
| UDP-glucose glycoprotein glucosyltransferase 2           | 423  |
| solute carrier family 35, member A5                      | 168  |
| G protein-coupled receptor 137C                          | 110  |

|                                                |       |
|------------------------------------------------|-------|
| DIP2 disco-interacting protein 2 homolog A (Dr | 298   |
| SMAD family member 6                           | 660   |
| FCH and double SH3 domains 1                   | 364   |
| exostosin glycosyltransferase 1                | 694   |
| trophinin associated protein                   | 270   |
| dual-specificity tyrosine-(Y)-phosphorylation  | 448   |
| lectin, galactoside-binding, soluble, 1        | 50186 |
| integrin-binding sialoprotein                  | 5     |
| glutamate receptor, ionotropic, N-methyl D-asp | 5     |
| N-acetylated alpha-linked acidic dipeptidase 2 | 5     |
| glucose-6-phosphatase, catalytic, 2            | 5     |
| catenin (cadherin-associated protein), delta 1 | 743   |
| germ cell associated 1                         | 5     |
| leucine rich repeat containing 6               | 5     |
| G protein-coupled receptor 34                  | 5     |
| kelch-like family member 36                    | 483   |
| chromosome 9 open reading frame 3              | 1591  |
| complement component 3                         | 932   |
| E2F transcription factor 1                     | 479   |
| transmembrane protein 233                      | 5     |
| chromosome 6 open reading frame 25             | 5     |
| peptidylprolyl isomerase D                     | 1544  |
| interleukin 5 receptor, alpha                  | 5     |
| G protein-coupled receptor 137B                | 389   |
| dual specificity phosphatase 1                 | 37211 |
| TRK-fused gene                                 | 2164  |
| guanine nucleotide binding protein (G protein) | 210   |
| GRB2-related adaptor protein 2                 | 5     |
| Spi-C transcription factor (Spi-1/PU.1 related | 5     |
| ARP3 actin-related protein 3 homolog (yeast)   | 816   |
| solute carrier family 2 (facilitated glucose t | 13928 |
| phosphofructokinase, muscle                    | 7010  |
| phytanoyl-CoA 2-hydroxylase                    | 1932  |
| schlafen family member 12-like                 | 5     |
| aldo-keto reductase family 1, member C4        | 5     |
| myoglobin                                      | 5     |
| Bartter syndrome, infantile, with sensorineura | 5     |
| delta-like 1 homolog (Drosophila)              | 1865  |
| neuropeptide S receptor 1                      | 5     |
| TNFAIP3 interacting protein 3                  | 5     |
| cytochrome P450, family 2, subfamily C, polype | 5     |
| proline-rich protein HaeIII subfamily 2        | 5     |
| PHD finger protein 19                          | 490   |
| ER membrane protein complex subunit 10         | 1981  |
| RUN domain containing 1                        | 927   |
| cyclin B1                                      | 6970  |
| trafficking protein particle complex 8         | 502   |
| NCK interacting protein with SH3 domain        | 4158  |
| SEC16 homolog B (S. cerevisiae)                | 251   |
| C-reactive protein, pentraxin-related          | 5     |
| ZFP62 zinc finger protein                      | 170   |
| caseinolytic mitochondrial matrix peptidase pr | 4038  |
| thyroglobulin                                  | 5     |
| purinergic receptor P2Y, G-protein coupled, 10 | 5     |

|                                                 |      |
|-------------------------------------------------|------|
| olfactory receptor, family 2, subfamily A, mem  | 5    |
| RNA terminal phosphate cyclase-like 1           | 203  |
| dynein, axonemal, heavy chain 9                 | 5    |
| solute carrier family 2 (facilitated glucose t  | 5    |
| cadherin 19, type 2                             | 5    |
| mannose-binding lectin (protein C) 2, soluble   | 5    |
| chromosome 18 open reading frame 42             | 5    |
| CD1c molecule                                   | 5    |
| peptidylprolyl isomerase domain and WD repeat   | 1377 |
| BTAFl RNA polymerase II, B-TFIID transcription  | 917  |
| mitochondrial ribosomal protein L12             | 2476 |
| formyl peptide receptor 1                       | 5    |
| RAB18, member RAS oncogene family               | 1410 |
| serpin peptidase inhibitor, clade A (alpha-1 a  | 5    |
| alpha- and gamma-adaptin binding protein        | 2536 |
| 3-hydroxyanthranilate 3,4-dioxygenase           | 7    |
| lipase maturation factor 1                      | 155  |
| wingless-type MMTV integration site family, me  | 5    |
| goosecoid homeobox 2                            | 5    |
| glycine-N-acyltransferase                       | 5    |
| interleukin 1 receptor accessory protein-like   | 5    |
| Uncharacterized protein; Zinc finger protein 7  | 5    |
| proline, glutamate and leucine rich protein 1   | 266  |
| LSM14A, SCD6 homolog A ( <i>S. cerevisiae</i> ) | 362  |
| leucine rich repeat containing 4C               | 5    |
| methyltransferase like 24                       | 5    |
| podocan-like 1                                  | 9    |
| mannosyl (alpha-1,3-)-glycoprotein beta-1,4-N-  | 5    |
| ribosomal protein S23                           | 832  |
| adenosine A3 receptor                           | 5    |
| tripartite motif containing 55                  | 5    |
| cyclin Pas1/PH080 domain containing 1           | 234  |
| proprotein convertase subtilisin/kexin type 9   | 2345 |
| BCL2-like 15                                    | 5    |
| angiopoietin-like 1                             | 5    |
| TSC22 domain family, member 2                   | 1062 |
| ATH1, acid trehalase-like 1 (yeast)             | 314  |
| zinc finger, MYM-type 4                         | 280  |
| general transcription factor IIIC, polypeptide  | 981  |
| transforming growth factor, beta-induced, 68kD  | 6307 |
| four and a half LIM domains 5                   | 5    |
| quinoid dihydropteridine reductase              | 4326 |
| Sp3 transcription factor                        | 285  |
| THAP domain containing 7                        | 769  |
| gamma-aminobutyric acid (GABA) A receptor, rho  | 5    |
| aquaporin 6, kidney specific                    | 5    |
| McKusick-Kaufman syndrome                       | 543  |
| Uncharacterized protein                         | 1851 |
| zinc finger protein 699                         | 5    |
| v-erb-b2 avian erythroblastic leukemia viral o  | 926  |
| potassium voltage-gated channel, subfamily H (  | 5    |
| protocadherin 11 X-linked                       | 5    |
| Kinesin light chain 1                           | 499  |
| tetraspanin 33                                  | 237  |

|                                                        |       |
|--------------------------------------------------------|-------|
| mutS homolog 2                                         | 1468  |
| staphylococcal nuclease and tudor domain conta         | 7201  |
| forkhead box K2                                        | 450   |
| non-SMC element 1 homolog ( <i>S. cerevisiae</i> )     | 1418  |
| cerebellar degeneration-related protein 1, 34k         | 5     |
| centromere protein H                                   | 1267  |
| tumor protein p53 binding protein, 2                   | 1531  |
| enoyl CoA hydratase domain containing 3                | 315   |
| G protein-coupled receptor 22                          | 5     |
| platelet factor 4                                      | 11    |
| ZFP36 ring finger protein-like 2                       | 317   |
| muscular LMNA-interacting protein                      | 8     |
| epidermal growth factor                                | 5     |
| deoxyribonuclease I-like 3                             | 5     |
| intraflagellar transport 74 homolog ( <i>Chlamydom</i> | 246   |
| ecotropic viral integration site 2A                    | 5     |
| collectin sub-family member 10 (C-type lectin)         | 5     |
| MAM domain containing 4                                | 377   |
| family with sequence similarity 181, member B          | 5     |
| cysteine-rich secretory protein 1                      | 5     |
| histone deacetylase 2                                  | 1701  |
| bone morphogenetic protein 10                          | 5     |
| CD63 molecule                                          | 7483  |
| ankyrin repeat and KH domain containing 1              | 247   |
| angiopoietin 4                                         | 5     |
| fibronectin type III domain containing 5               | 5     |
| ankyrin repeat and SOCS box containing 15              | 5     |
| metallothionein 1F                                     | 19    |
| G protein-coupled receptor 78                          | 5     |
| seryl-tRNA synthetase                                  | 20549 |
| C-type lectin domain family 17, member A               | 5     |
| toll-like receptor 4                                   | 47    |
| reticulocalbin 2, EF-hand calcium binding doma         | 4448  |
| autophagy related 2A                                   | 3795  |
| fatty acid amide hydrolase                             | 19    |
| cytohesin 1 interacting protein                        | 8     |
| tyrosinase-related protein 1                           | 16    |
| NLR family, pyrin domain containing 9                  | 5     |
| CD180 molecule                                         | 5     |
| ets homologous factor                                  | 5     |
| dihydrolipoamide dehydrogenase                         | 1623  |
| UDP-N-acetyl-alpha-D-galactosamine:polypeptide         | 5     |
| collectin sub-family member 11                         | 41    |
| ADP-ribosylation-like factor 6 interacting pro         | 1454  |
| neuroblastoma breakpoint family, member 24             | 5     |
| leukocyte-associated immunoglobulin-like recep         | 5     |
| 5-aminoimidazole-4-carboxamide ribonucleotide          | 5791  |
| SHC (Src homology 2 domain containing) transfo         | 18    |
| myosin IG                                              | 5     |
| HECT, UBA and WWE domain containing 1, E3 ubiq         | 741   |
| DEAH (Asp-Glu-Ala-His) box helicase 30                 | 252   |
| transthyretin                                          | 12915 |
| serine/arginine-rich splicing factor 7                 | 16077 |
| tubulin, gamma complex associated protein 2            | 1638  |

|                                                  |       |
|--------------------------------------------------|-------|
| X-ray repair complementing defective repair in   | 14802 |
| ArfGAP with GTPase domain, ankyrin repeat and    | 5     |
| GTPase activating protein (SH3 domain) binding   | 4413  |
| ectonucleotide pyrophosphatase/phosphodiesterase | 15    |
| toll-like receptor 8                             | 5     |
| abhydrolase domain containing 16B                | 5     |
| ATP-binding cassette, sub-family D (ALD), memb   | 5     |
| capping protein (actin filament) muscle Z-line   | 545   |
| apolipoprotein B                                 | 31    |
| ficolin (collagen/fibrinogen domain containing   | 5     |
| tripartite motif containing 72                   | 8     |
| solute carrier family 22 (organic cation trans   | 5     |
| WD repeat domain 77                              | 1214  |
| bone marrow stromal cell antigen 1               | 44    |
| zinc finger and BTB domain containing 38         | 1270  |
| lactotransferrin                                 | 5     |
| DEAD (Asp-Glu-Ala-Asp) box polypeptide 53        | 5     |
| protein tyrosine phosphatase, receptor type, F   | 14842 |
| NK2 homeobox 1                                   | 9     |
| frizzled family receptor 8                       | 791   |
| quiescin Q6 sulfhydryl oxidase 1                 | 9246  |
| mitochondrial ribosomal protein L22              | 5309  |
| GATS protein-like 2                              | 5     |
| caspase recruitment domain family, member 11     | 13    |
| ER membrane protein complex subunit 1            | 5396  |
| ATP-binding cassette, sub-family A (ABC1), mem   | 7     |
| t-complex 10-like                                | 5     |
| epidermal growth factor receptor pathway subst   | 2643  |
| HBS1-like ( <i>S. cerevisiae</i> )               | 2367  |
| gonadotropin-releasing hormone receptor          | 5     |
| ubiquitin specific peptidase 15                  | 286   |
| insulin induced gene 1                           | 1776  |
| t-complex 1                                      | 15828 |
| NudC domain containing 3                         | 659   |
| zinc finger protein 141                          | 19    |
| Ran GTPase activating protein 1                  | 2648  |
| T-cell immunoglobulin and mucin domain contain   | 10    |
| timeless circadian clock                         | 3085  |
| Hermansky-Pudlak syndrome 4                      | 719   |
| Sec23 homolog B ( <i>S. cerevisiae</i> )         | 1829  |
| RAB43, member RAS oncogene family                | 5     |
| neuron-derived neurotrophic factor               | 51    |
| WD repeat domain 13                              | 1128  |
| LLP homolog, long-term synaptic facilitation (   | 88    |
| phospholysine phosphohistidine inorganic pyrop   | 2365  |
| solute carrier family 25 (mitochondrial carrie   | 1169  |
| chromosome 12 open reading frame 79              | 5     |
| low density lipoprotein receptor-related prote   | 16    |
| ADAM metallopeptidase domain 7                   | 5     |
| family with sequence similarity 229, member B    | 237   |
| nucleoporin 93kDa                                | 1604  |
| arginine-fifty homeobox                          | 5     |
| DnaJ (Hsp40) homolog, subfamily C, member 15     | 3290  |
| eukaryotic translation initiation factor 2A, 6   | 3166  |

|                                                |       |
|------------------------------------------------|-------|
| ring finger protein 126                        | 658   |
| corticotropin releasing hormone receptor 2     | 5     |
| sine oculis binding protein homolog (Drosophil | 22    |
| fused in sarcoma                               | 30612 |
| transcription factor 3                         | 1267  |
| transmembrane protein 39A                      | 1088  |
| major facilitator superfamily domain containin | 6     |
| serine hydroxymethyltransferase 1 (soluble)    | 3432  |
| WD repeat domain 75                            | 174   |
| leucine rich repeat containing 34              | 48    |
| smoothelin-like 2                              | 23    |
| leucine rich repeat containing 2               | 5     |
| early B-cell factor 4                          | 1194  |
| G protein-coupled receptor 183                 | 112   |
| ankyrin repeat and sterile alpha motif domain  | 40    |
| gamma-glutamylamine cyclotransferase           | 164   |
| LIM and cysteine-rich domains 1                | 1023  |
| collapsin response mediator protein 1          | 252   |
| splicing factor 3a, subunit 1, 120kDa          | 1091  |
| translocase of inner mitochondrial membrane 50 | 2210  |
| KIAA1715                                       | 858   |
| neuregulin 3                                   | 27    |
| membrane-associated ring finger (C3HC4) 6, E3  | 14086 |
| Uncharacterized protein                        | 5     |
| ankyrin repeat and FYVE domain containing 1    | 969   |
| CUGBP, Elav-like family member 3               | 5     |
| interleukin 10 receptor, alpha                 | 5     |
| fibrinogen beta chain                          | 1017  |
| vascular cell adhesion molecule 1              | 33    |
| Kruppel-like factor 2 (lung)                   | 431   |
| polymerase (DNA-directed), delta 4, accessory  | 6724  |
| COP9 signalosome subunit 8                     | 1979  |
| family with sequence similarity 208, member A  | 60    |
| ribosomal protein S6 kinase-like 1             | 9     |
| cytoplasmic FMR1 interacting protein 1         | 40959 |
| claudin 11                                     | 1116  |
| leucine rich repeat containing 40              | 88    |
| spermatogenesis associated 6-like              | 14    |
| discs, large (Drosophila) homolog-associated p | 8     |
| family with sequence similarity 213, member A  | 482   |
| chromosome 9 open reading frame 156            | 177   |
| zinc finger protein 334                        | 36    |
| NAD(P)H dehydrogenase, quinone 2               | 62    |
| Rho GTPase activating protein 12               | 190   |
| chromosome 16 open reading frame 45            | 60    |
| RWD domain containing 1                        | 296   |
| DnaJ (Hsp40) homolog, subfamily B, member 4    | 633   |
| ribosomal protein S24                          | 39029 |
| PX domain containing serine/threonine kinase   | 220   |
| leucine rich repeat containing 49              | 94    |
| C-type lectin domain family 4, member C        | 5     |
| guanylate cyclase 1, soluble, alpha 3          | 42    |
| cadherin-like and PC-esterase domain containin | 77    |
| SRY (sex determining region Y)-box 17          | 65    |



|                                                          |       |
|----------------------------------------------------------|-------|
| pecanex-like 2 ( <i>Drosophila</i> )                     | 49    |
| renalase, FAD-dependent amine oxidase                    | 48    |
| carboxypeptidase, vitellogenic-like                      | 439   |
| hydroxysteroid (11-beta) dehydrogenase 1                 | 61    |
| CCR4 carbon catabolite repression 4-like ( <i>S. c</i> ) | 101   |
| interferon-induced protein with tetratricopept           | 72    |
| chromosome 11 open reading frame 54                      | 47    |
| KIAA1551                                                 | 15    |
| DDRGK domain containing 1                                | 3324  |
| zinc finger protein 140                                  | 137   |
| family with sequence similarity 120A opposite            | 258   |
| complement component 8, alpha polypeptide                | 5     |
| biliverdin reductase A                                   | 144   |
| glioma tumor suppressor candidate region gene            | 18735 |
| family with sequence similarity 127, member C            | 1251  |
| carbohydrate (N-acetylglucosamine-6-0) sulfotr           | 154   |
| myosin, heavy chain 9, non-muscle                        | 1317  |
| G protein-coupled receptor 56                            | 44    |
| pantothenate kinase 2                                    | 1244  |
| suppressor of cytokine signaling 5                       | 72    |
| ubiquinol-cytochrome c reductase, complex III            | 34490 |
| cofilin 2 (muscle)                                       | 902   |
| ST20-MTHFS readthrough                                   | 1604  |
| myosin IF                                                | 33    |
| protein arginine methyltransferase 7                     | 6277  |
| mitochondrial ribosomal protein L39                      | 470   |
| heterogeneous nuclear ribonucleoprotein A0               | 22668 |
| integrator complex subunit 6                             | 433   |
| tumor necrosis factor, alpha-induced protein 8           | 259   |
| pre-mRNA processing factor 4                             | 2735  |
| calcium channel, voltage-dependent, L type, al           | 69    |
| cytochrome b5 domain containing 2                        | 668   |
| cytochrome P450, family 20, subfamily A, polyp           | 170   |
| sodium channel, voltage-gated, type I, alpha s           | 21    |
| Bet1 golgi vesicular membrane trafficking prot           | 722   |
| CD1d molecule                                            | 7     |
| G protein-coupled receptor 35                            | 71    |
| four and a half LIM domains 2                            | 3097  |
| N-6 adenine-specific DNA methyltransferase 1 (           | 93    |
| biogenesis of lysosomal organelles complex-1,            | 83    |
| methionine sulfoxide reductase B2                        | 6585  |
| phospholipase C-like 1                                   | 31    |
| peroxiredoxin 2                                          | 7500  |
| fibrinogen gamma chain                                   | 488   |
| 5,10-methenyltetrahydrofolate synthetase (5-fo           | 1604  |
| cytochrome b5 type A (microsomal)                        | 549   |
| Src-like-adaptor                                         | 5     |
| glypican 5                                               | 65    |
| CHRNA7 (cholinergic receptor, nicotinic, alpha           | 5     |
| apolipoprotein B mRNA editing enzyme, catalyti           | 10    |
| phosphoenolpyruvate carboxykinase 1 (soluble)            | 5     |
| glucose-6-phosphate isomerase                            | 8230  |
| lysyl oxidase-like 2                                     | 701   |
| pancreatic progenitor cell differentiation and           | 17979 |

|                                                |       |
|------------------------------------------------|-------|
| calcium channel, voltage-dependent, N type, al | 5     |
| phosphoinositide-3-kinase adaptor protein 1    | 14    |
| G protein-coupled receptor 125                 | 1042  |
| G protein-coupled receptor 25                  | 5     |
| chromosome 18 open reading frame 32            | 733   |
| angiotensin I converting enzyme                | 12    |
| protein phosphatase 2, regulatory subunit A, a | 65937 |
| transcription elongation factor A (SII) N-term | 78    |
| A kinase (PRKA) anchor protein 11              | 71    |
| synaptonemal complex protein 2-like            | 140   |
| BH3 interacting domain death agonist           | 187   |
| potassium voltage-gated channel, KQT-like subf | 50    |
| Ras-like without CAAX 1                        | 192   |
| transmembrane protein 257                      | 5     |
| atypical chemokine receptor 4                  | 5     |
| ring finger protein 41                         | 152   |

| Total sites | 8mer sites | 7mer-m8 sites |    |
|-------------|------------|---------------|----|
|             | 18         | 0             | 18 |
|             | 10         | 2             | 7  |
|             | 6          | 1             | 2  |
|             | 4          | 2             | 0  |
|             | 4          | 2             | 1  |
|             | 6          | 0             | 6  |
|             | 2          | 2             | 0  |
|             | 2          | 2             | 0  |
|             | 5          | 2             | 1  |
|             | 8          | 1             | 7  |
|             | 4          | 2             | 2  |
|             | 5          | 1             | 2  |
|             | 5          | 4             | 0  |
|             | 2          | 0             | 1  |
|             | 6          | 0             | 6  |
|             | 4          | 2             | 1  |
|             | 1          | 1             | 0  |
|             | 1          | 1             | 0  |
|             | 2          | 0             | 2  |
|             | 7          | 0             | 7  |
|             | 4          | 2             | 2  |
|             | 4          | 0             | 4  |
|             | 4          | 1             | 1  |
|             | 1          | 1             | 0  |
|             | 4          | 0             | 3  |
|             | 1          | 1             | 0  |
|             | 3          | 0             | 3  |
|             | 4          | 0             | 1  |
|             | 4          | 1             | 1  |
|             | 3          | 1             | 0  |
|             | 4          | 0             | 2  |
|             | 5          | 0             | 0  |
|             | 4          | 1             | 2  |
|             | 1          | 1             | 0  |
|             | 1          | 1             | 0  |
|             | 6          | 0             | 6  |
|             | 1          | 1             | 0  |
|             | 5          | 2             | 2  |
|             | 3          | 1             | 0  |
|             | 3          | 0             | 2  |
|             | 1          | 1             | 0  |
|             | 3          | 1             | 1  |
|             | 1          | 1             | 0  |
|             | 3          | 1             | 2  |
|             | 3          | 0             | 1  |
|             | 3          | 0             | 3  |
|             | 1          | 1             | 0  |
|             | 1          | 1             | 0  |
|             | 2          | 0             | 2  |
|             | 10         | 1             | 9  |
|             | 4          | 0             | 4  |
|             | 2          | 1             | 1  |
|             | 2          | 1             | 0  |

|    |   |   |
|----|---|---|
| 2  | 0 | 2 |
| 3  | 1 | 1 |
| 3  | 0 | 3 |
| 4  | 2 | 1 |
| 2  | 1 | 1 |
| 1  | 1 | 0 |
| 3  | 1 | 2 |
| 1  | 1 | 0 |
| 2  | 1 | 0 |
| 4  | 0 | 1 |
| 2  | 0 | 1 |
| 2  | 0 | 1 |
| 1  | 1 | 0 |
| 2  | 2 | 0 |
| 3  | 0 | 3 |
| 1  | 1 | 0 |
| 1  | 1 | 0 |
| 5  | 1 | 3 |
| 3  | 1 | 0 |
| 3  | 0 | 1 |
| 5  | 0 | 3 |
| 4  | 0 | 3 |
| 1  | 1 | 0 |
| 1  | 1 | 0 |
| 3  | 0 | 2 |
| 3  | 1 | 1 |
| 2  | 1 | 1 |
| 1  | 1 | 0 |
| 1  | 1 | 0 |
| 3  | 0 | 3 |
| 1  | 1 | 0 |
| 3  | 0 | 2 |
| 3  | 1 | 2 |
| 1  | 1 | 0 |
| 1  | 1 | 0 |
| 2  | 1 | 0 |
| 3  | 2 | 0 |
| 1  | 1 | 0 |
| 1  | 0 | 1 |
| 11 | 0 | 9 |
| 1  | 1 | 0 |
| 4  | 0 | 3 |
| 2  | 0 | 2 |
| 4  | 2 | 0 |
| 1  | 1 | 0 |
| 3  | 0 | 2 |
| 2  | 0 | 2 |
| 6  | 1 | 5 |
| 1  | 1 | 0 |
| 3  | 1 | 1 |
| 2  | 1 | 1 |
| 4  | 2 | 1 |
| 1  | 1 | 0 |
| 8  | 2 | 3 |

|   |   |   |
|---|---|---|
| 5 | 2 | 1 |
| 2 | 0 | 2 |
| 6 | 0 | 4 |
| 3 | 1 | 2 |
| 2 | 0 | 1 |
| 3 | 0 | 2 |
| 2 | 0 | 1 |
| 4 | 0 | 3 |
| 3 | 2 | 1 |
| 2 | 1 | 1 |
| 1 | 1 | 0 |
| 1 | 1 | 0 |
| 1 | 1 | 0 |
| 3 | 1 | 2 |
| 3 | 1 | 1 |
| 1 | 1 | 0 |
| 1 | 1 | 0 |
| 4 | 3 | 0 |
| 2 | 1 | 0 |
| 4 | 0 | 4 |
| 2 | 0 | 1 |
| 2 | 2 | 0 |
| 1 | 1 | 0 |
| 2 | 1 | 0 |
| 1 | 1 | 0 |
| 2 | 1 | 1 |
| 3 | 0 | 2 |
| 2 | 0 | 1 |
| 1 | 1 | 0 |
| 3 | 1 | 2 |
| 3 | 0 | 0 |
| 1 | 1 | 0 |
| 2 | 0 | 2 |
| 3 | 0 | 1 |
| 1 | 1 | 0 |
| 2 | 0 | 1 |
| 1 | 0 | 1 |
| 5 | 1 | 2 |
| 1 | 0 | 1 |
| 2 | 0 | 0 |
| 2 | 0 | 0 |
| 5 | 2 | 1 |
| 1 | 1 | 0 |
| 4 | 1 | 2 |
| 2 | 0 | 0 |
| 2 | 1 | 0 |
| 2 | 1 | 1 |
| 3 | 1 | 2 |
| 3 | 1 | 0 |
| 1 | 1 | 0 |
| 3 | 0 | 2 |
| 2 | 0 | 1 |
| 7 | 1 | 4 |
| 2 | 1 | 1 |

|   |   |   |
|---|---|---|
| 3 | 1 | 1 |
| 3 | 0 | 2 |
| 2 | 0 | 1 |
| 1 | 1 | 0 |
| 2 | 1 | 1 |
| 2 | 1 | 1 |
| 3 | 0 | 2 |
| 1 | 0 | 1 |
| 1 | 1 | 0 |
| 3 | 0 | 2 |
| 1 | 0 | 1 |
| 1 | 1 | 0 |
| 4 | 0 | 3 |
| 2 | 1 | 1 |
| 3 | 0 | 3 |
| 2 | 0 | 1 |
| 5 | 2 | 3 |
| 1 | 1 | 0 |
| 1 | 0 | 0 |
| 4 | 1 | 3 |
| 2 | 1 | 1 |
| 3 | 2 | 1 |
| 2 | 0 | 0 |
| 3 | 1 | 2 |
| 1 | 1 | 0 |
| 3 | 0 | 1 |
| 3 | 0 | 0 |
| 3 | 1 | 1 |
| 2 | 0 | 2 |
| 4 | 0 | 3 |
| 2 | 1 | 1 |
| 2 | 1 | 1 |
| 1 | 0 | 0 |
| 3 | 0 | 1 |
| 1 | 1 | 0 |
| 1 | 1 | 0 |
| 1 | 1 | 0 |
| 1 | 1 | 0 |
| 3 | 2 | 1 |
| 1 | 1 | 0 |
| 1 | 1 | 0 |
| 2 | 1 | 0 |
| 3 | 0 | 2 |
| 4 | 0 | 2 |
| 5 | 1 | 2 |
| 2 | 1 | 1 |
| 6 | 0 | 4 |
| 3 | 1 | 2 |
| 1 | 1 | 0 |
| 4 | 2 | 1 |
| 1 | 0 | 0 |
| 1 | 1 | 0 |
| 1 | 1 | 0 |
| 2 | 1 | 1 |

|   |   |   |
|---|---|---|
| 1 | 1 | 0 |
| 1 | 0 | 1 |
| 2 | 1 | 1 |
| 4 | 0 | 1 |
| 2 | 0 | 2 |
| 2 | 0 | 0 |
| 2 | 1 | 1 |
| 2 | 1 | 1 |
| 1 | 1 | 0 |
| 1 | 0 | 1 |
| 1 | 0 | 1 |
| 3 | 1 | 2 |
| 2 | 0 | 0 |
| 2 | 1 | 0 |
| 1 | 1 | 0 |
| 1 | 1 | 0 |
| 9 | 4 | 1 |
| 4 | 1 | 2 |
| 2 | 0 | 0 |
| 2 | 1 | 0 |
| 1 | 1 | 0 |
| 2 | 1 | 0 |
| 3 | 1 | 2 |
| 2 | 0 | 2 |
| 1 | 0 | 1 |
| 2 | 1 | 1 |
| 2 | 1 | 0 |
| 1 | 0 | 1 |
| 4 | 1 | 2 |
| 2 | 0 | 2 |
| 2 | 1 | 1 |
| 2 | 1 | 1 |
| 1 | 1 | 0 |
| 4 | 1 | 3 |
| 2 | 0 | 1 |
| 3 | 0 | 2 |
| 1 | 1 | 0 |
| 1 | 1 | 0 |
| 1 | 1 | 0 |
| 1 | 0 | 1 |
| 6 | 2 | 3 |
| 1 | 1 | 0 |
| 2 | 0 | 1 |
| 1 | 1 | 0 |
| 1 | 1 | 0 |
| 1 | 1 | 0 |
| 2 | 1 | 0 |
| 1 | 1 | 0 |
| 1 | 1 | 0 |
| 1 | 1 | 0 |
| 1 | 0 | 0 |
| 5 | 0 | 3 |
| 1 | 1 | 0 |
| 2 | 0 | 2 |

|   |   |   |
|---|---|---|
| 1 | 1 | 0 |
| 2 | 1 | 0 |
| 2 | 0 | 0 |
| 1 | 1 | 0 |
| 3 | 1 | 2 |
| 3 | 1 | 2 |
| 2 | 1 | 0 |
| 1 | 1 | 0 |
| 2 | 0 | 1 |
| 2 | 1 | 0 |
| 2 | 1 | 0 |
| 2 | 1 | 1 |
| 2 | 0 | 2 |
| 1 | 1 | 0 |
| 1 | 1 | 0 |
| 2 | 0 | 2 |
| 2 | 1 | 0 |
| 2 | 1 | 0 |
| 1 | 1 | 0 |
| 2 | 1 | 0 |
| 3 | 0 | 2 |
| 2 | 0 | 1 |
| 4 | 0 | 3 |
| 1 | 1 | 0 |
| 4 | 3 | 1 |
| 2 | 1 | 1 |
| 1 | 1 | 0 |
| 2 | 0 | 0 |
| 1 | 0 | 1 |
| 2 | 1 | 0 |
| 2 | 0 | 2 |
| 2 | 0 | 1 |
| 2 | 0 | 1 |
| 1 | 0 | 1 |
| 3 | 0 | 1 |
| 2 | 0 | 1 |
| 1 | 0 | 1 |
| 1 | 0 | 0 |
| 3 | 0 | 3 |
| 2 | 1 | 1 |
| 1 | 1 | 0 |
| 2 | 0 | 1 |
| 2 | 0 | 1 |
| 6 | 2 | 1 |
| 1 | 0 | 0 |
| 1 | 0 | 0 |
| 2 | 0 | 2 |
| 1 | 0 | 1 |
| 3 | 0 | 2 |
| 1 | 0 | 1 |
| 2 | 0 | 1 |
| 1 | 0 | 1 |
| 1 | 1 | 0 |
| 5 | 1 | 0 |



|   |   |   |
|---|---|---|
| 2 | 0 | 2 |
| 1 | 0 | 0 |
| 3 | 1 | 1 |
| 2 | 0 | 0 |
| 3 | 0 | 2 |
| 5 | 0 | 5 |
| 3 | 1 | 2 |
| 1 | 1 | 0 |
| 1 | 1 | 0 |
| 4 | 1 | 1 |
| 1 | 1 | 0 |
| 3 | 0 | 3 |
| 2 | 1 | 0 |
| 1 | 1 | 0 |
| 2 | 1 | 1 |
| 1 | 0 | 1 |
| 1 | 0 | 0 |
| 1 | 1 | 0 |
| 1 | 1 | 0 |
| 1 | 1 | 0 |
| 1 | 0 | 1 |
| 2 | 1 | 0 |
| 1 | 0 | 1 |
| 1 | 1 | 0 |
| 3 | 1 | 1 |
| 1 | 0 | 1 |
| 1 | 1 | 0 |
| 1 | 0 | 0 |
| 1 | 1 | 1 |
| 1 | 1 | 0 |
| 3 | 1 | 2 |
| 1 | 1 | 0 |
| 5 | 1 | 3 |
| 3 | 0 | 1 |
| 1 | 1 | 0 |
| 1 | 0 | 1 |
| 2 | 0 | 2 |
| 1 | 0 | 1 |
| 1 | 0 | 0 |
| 1 | 0 | 1 |
| 1 | 1 | 0 |
| 2 | 0 | 2 |
| 1 | 0 | 0 |
| 1 | 0 | 0 |
| 1 | 1 | 0 |
| 2 | 0 | 2 |
| 1 | 0 | 0 |
| 1 | 0 | 0 |
| 1 | 1 | 0 |
| 2 | 0 | 0 |
| 2 | 0 | 1 |
|   | 1 | 0 |
| 1 | 0 | 0 |
| 1 | 0 | 1 |
| 2 | 1 | 1 |
| 1 | 0 | 1 |
| 1 | 1 | 0 |
| 1 | 1 | 0 |

2\*

|   |   |   |
|---|---|---|
| 1 | 1 | 0 |
| 1 | 0 | 0 |
| 1 | 1 | 0 |
| 3 | 1 | 2 |
| 1 | 1 | 0 |
| 1 | 0 | 0 |
| 2 | 1 | 1 |
| 1 | 0 | 1 |
| 3 | 0 | 1 |
| 4 | 1 | 3 |
| 4 | 2 | 0 |
| 2 | 0 | 0 |
| 2 | 2 | 0 |
| 1 | 1 | 0 |
| 1 | 0 | 0 |
| 1 | 0 | 1 |
| 4 | 3 | 1 |
| 2 | 1 | 0 |
| 1 | 1 | 0 |
| 1 | 0 | 1 |
| 1 | 0 | 0 |
| 1 | 0 | 1 |
| 2 | 0 | 2 |
| 1 | 1 | 0 |
| 1 | 1 | 0 |
| 3 | 0 | 1 |
| 1 | 1 | 0 |
| 3 | 0 | 3 |
| 1 | 0 | 0 |
| 3 | 0 | 3 |
| 1 | 0 | 1 |
| 1 | 0 | 0 |
| 2 | 0 | 2 |
| 3 | 0 | 2 |
| 1 | 0 | 1 |
| 1 | 1 | 0 |
| 2 | 0 | 2 |
| 1 | 0 | 1 |
| 1 | 1 | 0 |
| 1 | 0 | 0 |
| 1 | 0 | 0 |
| 5 | 1 | 3 |
| 1 | 1 | 0 |
| 1 | 0 | 0 |
| 3 | 0 | 3 |
| 1 | 0 | 1 |
| 2 | 0 | 2 |
| 1 | 0 | 1 |
| 3 | 1 | 1 |
| 1 | 0 | 1 |
| 3 | 0 | 2 |
| 2 | 2 | 0 |
| 1 | 0 | 1 |

|   |   |   |
|---|---|---|
| 1 | 0 | 0 |
| 5 | 1 | 4 |
| 1 | 0 | 1 |
| 2 | 0 | 1 |
| 5 | 1 | 1 |
| 2 | 1 | 1 |
| 3 | 0 | 3 |
| 1 | 0 | 1 |
| 3 | 1 | 2 |
| 1 | 0 | 1 |
| 2 | 0 | 1 |
| 1 | 0 | 0 |
| 1 | 0 | 1 |
| 1 | 0 | 0 |
| 1 | 0 | 0 |
| 1 | 0 | 1 |
| 1 | 0 | 1 |
| 2 | 0 | 1 |
| 3 | 1 | 1 |
| 1 | 0 | 0 |
| 1 | 0 | 0 |
| 1 | 0 | 0 |
| 2 | 0 | 1 |
| 2 | 0 | 1 |
| 1 | 0 | 1 |
| 1 | 0 | 1 |
| 2 | 1 | 0 |
| 2 | 0 | 2 |
| 2 | 0 | 2 |
| 3 | 1 | 0 |
| 2 | 2 | 0 |
| 1 | 0 | 0 |
| 1 | 1 | 0 |
| 2 | 0 | 2 |
| 1 | 0 | 1 |
| 1 | 1 | 0 |
| 4 | 0 | 1 |
| 4 | 0 | 3 |
| 1 | 0 | 0 |
| 2 | 1 | 1 |
| 1 | 1 | 0 |
| 2 | 2 | 0 |
| 2 | 1 | 1 |
| 5 | 0 | 5 |
| 1 | 1 | 0 |
| 1 | 1 | 0 |
| 2 | 1 | 1 |
| 1 | 0 | 1 |
| 5 | 0 | 3 |
| 2 | 0 | 1 |
| 1 | 0 | 1 |
| 1 | 0 | 1 |
| 2 | 1 | 0 |
| 2 | 0 | 1 |

2\*

|   |   |   |
|---|---|---|
| 2 | 1 | 1 |
| 1 | 0 | 1 |
| 1 | 1 | 0 |
| 1 | 0 | 0 |
| 2 | 0 | 1 |
| 1 | 1 | 0 |
| 1 | 1 | 0 |
| 3 | 1 | 1 |
| 2 | 2 | 0 |
| 2 | 1 | 1 |
| 1 | 1 | 0 |
| 4 | 1 | 1 |
| 2 | 0 | 2 |
| 1 | 0 | 0 |
| 4 | 0 | 4 |
| 2 | 0 | 2 |
| 4 | 0 | 3 |
| 8 | 0 | 6 |
| 3 | 0 | 3 |
| 2 | 1 | 0 |
| 5 | 1 | 3 |
| 1 | 0 | 0 |
| 1 | 0 | 1 |
| 1 | 0 | 0 |
| 1 | 1 | 0 |
| 1 | 0 | 1 |
| 1 | 1 | 0 |
| 1 | 0 | 1 |
| 1 | 0 | 1 |
| 2 | 0 | 1 |
| 2 | 0 | 2 |
| 1 | 0 | 1 |
| 1 | 0 | 1 |
| 2 | 0 | 0 |
| 1 | 1 | 0 |
|   | 0 | 0 |
| 1 | 1 | 0 |
| 1 | 1 | 0 |
| 1 | 0 | 1 |
| 2 | 1 | 0 |
| 2 | 0 | 1 |
| 3 | 1 | 1 |
| 1 | 0 | 1 |
| 1 | 1 | 0 |
| 1 | 1 | 0 |
| 2 | 1 | 1 |
| 1 | 0 | 1 |
| 2 | 0 | 0 |
| 2 | 0 | 0 |
| 1 | 0 | 1 |
| 1 | 1 | 0 |
| 1 | 0 | 1 |
| 4 | 0 | 1 |
| 1 | 0 | 1 |

2\*

|   |   |   |
|---|---|---|
| 1 | 1 | 0 |
| 1 | 0 | 0 |
| 1 | 0 | 1 |
| 1 | 0 | 1 |
| 1 | 1 | 0 |
| 3 | 0 | 3 |
| 3 | 0 | 1 |
| 2 | 0 | 0 |
| 2 | 0 | 1 |
| 1 | 0 | 0 |
| 1 | 1 | 0 |
| 3 | 0 | 3 |
| 1 | 1 | 0 |
| 1 | 1 | 0 |
| 2 | 0 | 2 |
| 2 | 1 | 0 |
| 1 | 1 | 0 |
| 2 | 0 | 1 |
| 1 | 1 | 0 |
| 1 | 1 | 0 |
| 1 | 0 | 1 |
| 1 | 0 | 1 |
| 2 | 0 | 1 |
| 2 | 1 | 1 |
| 1 | 0 | 0 |
| 1 | 1 | 0 |
| 1 | 1 | 0 |
| 1 | 0 | 1 |
| 1 | 0 | 1 |
| 1 | 1 | 0 |
| 1 | 0 | 1 |
| 2 | 0 | 2 |
| 2 | 0 | 2 |
| 1 | 0 | 1 |
| 1 | 0 | 1 |
| 2 | 1 | 1 |
| 2 | 1 | 0 |
| 1 | 0 | 0 |
| 1 | 1 | 0 |
| 1 | 1 | 0 |
| 3 | 0 | 2 |
| 2 | 0 | 2 |
| 2 | 2 | 0 |
| 1 | 0 | 0 |
| 1 | 0 | 1 |
| 1 | 0 | 0 |
| 1 | 1 | 0 |
| 2 | 0 | 2 |
| 1 | 0 | 1 |
| 2 | 0 | 0 |
| 1 | 1 | 0 |
| 2 | 0 | 1 |
| 1 | 0 | 0 |
| 1 | 1 | 0 |
| 5 | 0 | 5 |

|   |   |   |
|---|---|---|
| 1 | 0 | 0 |
| 5 | 0 | 2 |
| 1 | 1 | 0 |
| 2 | 1 | 0 |
| 1 | 0 | 1 |
| 1 | 0 | 0 |
| 1 | 0 | 1 |
| 1 | 0 | 1 |
| 1 | 0 | 1 |
| 2 | 0 | 0 |
| 2 | 0 | 2 |
| 1 | 0 | 0 |
| 1 | 0 | 1 |
| 1 | 0 | 1 |
| 1 | 1 | 0 |
| 2 | 0 | 2 |
| 1 | 0 | 1 |
| 1 | 0 | 1 |
| 5 | 0 | 2 |
| 1 | 0 | 0 |
| 2 | 0 | 0 |
| 2 | 0 | 2 |
| 2 | 0 | 1 |
| 1 | 0 | 0 |
| 1 | 0 | 0 |
| 2 | 0 | 0 |
| 1 | 1 | 0 |
| 1 | 0 | 0 |
| 5 | 2 | 2 |
| 1 | 0 | 1 |
| 1 | 0 | 1 |
| 1 | 0 | 0 |
| 1 | 0 | 1 |
| 1 | 0 | 0 |
| 2 | 1 | 1 |
| 2 | 0 | 1 |
| 2 | 0 | 1 |
| 3 | 0 | 0 |
| 2 | 0 | 1 |
| 2 | 0 | 2 |
| 1 | 0 | 1 |
| 1 | 0 | 1 |
| 1 | 0 | 1 |
| 1 | 0 | 1 |
| 4 | 1 | 0 |
| 2 | 0 | 1 |
| 4 | 1 | 2 |
| 1 | 0 | 0 |
| 2 | 0 | 2 |
| 1 | 0 | 1 |
| 2 | 1 | 1 |
| 1 | 0 | 0 |
| 1 | 0 | 0 |
| 1 | 0 | 1 |

|   |   |   |
|---|---|---|
| 1 | 0 | 1 |
| 2 | 0 | 2 |
| 3 | 1 | 2 |
| 1 | 0 | 1 |
| 1 | 0 | 1 |
| 2 | 1 | 0 |
| 1 | 1 | 0 |
| 2 | 0 | 2 |
| 4 | 2 | 2 |
| 1 | 0 | 0 |
| 4 | 0 | 4 |
| 3 | 0 | 1 |
| 3 | 3 | 0 |
| 2 | 0 | 1 |
| 1 | 0 | 1 |
| 1 | 0 | 0 |
| 2 | 0 | 1 |
| 1 | 0 | 1 |
| 2 | 0 | 1 |
| 1 | 0 | 0 |
| 1 | 0 | 1 |
| 2 | 0 | 0 |
| 1 | 0 | 0 |
| 2 | 0 | 1 |
| 1 | 1 | 0 |
| 1 | 0 | 0 |
| 1 | 0 | 1 |
| 1 | 0 | 1 |
| 2 | 0 | 1 |
| 1 | 0 | 1 |
| 2 | 1 | 1 |
| 2 | 1 | 0 |
| 2 | 1 | 0 |
| 1 | 1 | 0 |
| 1 | 0 | 1 |
| 1 | 1 | 0 |
| 1 | 0 | 0 |
| 1 | 0 | 1 |
| 2 | 0 | 1 |
| 1 | 1 | 0 |
| 3 | 0 | 3 |
| 1 | 0 | 1 |
| 1 | 0 | 0 |
| 2 | 1 | 1 |
| 1 | 1 | 0 |
| 1 | 0 | 1 |
| 1 | 1 | 0 |
| 1 | 0 | 1 |
| 1 | 0 | 1 |
| 2 | 0 | 1 |
| 1 | 0 | 0 |
| 1 | 0 | 1 |
| 1 | 0 | 1 |
| 1 | 0 | 0 |
| 2 | 1 | 0 |

|   |   |   |
|---|---|---|
| 1 | 0 | 1 |
| 1 | 0 | 1 |
| 1 | 0 | 1 |
| 1 | 0 | 0 |
| 4 | 2 | 1 |
| 2 | 0 | 1 |
| 4 | 0 | 0 |
| 1 | 1 | 0 |
| 2 | 1 | 0 |
| 1 | 0 | 0 |
| 1 | 1 | 0 |
| 2 | 1 | 0 |
| 2 | 0 | 2 |
| 1 | 0 | 0 |
| 2 | 0 | 0 |
| 1 | 0 | 1 |
| 1 | 0 | 0 |
| 1 | 1 | 0 |
| 2 | 0 | 1 |
| 1 | 0 | 1 |
| 1 | 0 | 0 |
| 1 | 1 | 0 |
| 1 | 0 | 1 |
| 2 | 0 | 0 |
| 3 | 1 | 1 |
| 2 | 1 | 1 |
| 1 | 0 | 1 |
| 1 | 0 | 1 |
| 3 | 0 | 0 |
| 1 | 0 | 0 |
| 3 | 0 | 3 |
| 1 | 0 | 0 |
| 1 | 0 | 1 |
| 1 | 0 | 1 |
| 1 | 0 | 1 |
| 1 | 0 | 1 |
| 1 | 0 | 1 |
| 1 | 0 | 0 |
| 2 | 0 | 2 |
| 1 | 0 | 1 |
| 1 | 0 | 1 |
| 1 | 0 | 1 |
| 1 | 0 | 1 |
| 1 | 0 | 1 |
| 2 | 0 | 1 |
| 2 | 1 | 0 |
| 1 | 0 | 1 |
| 1 | 0 | 1 |
| 1 | 0 | 1 |
| 3 | 0 | 3 |
| 1 | 0 | 1 |
| 2 | 0 | 1 |
| 4 | 0 | 4 |
| 3 | 0 | 2 |
| 1 | 0 | 1 |



|   |   |   |
|---|---|---|
| 1 | 0 | 0 |
| 3 | 1 | 2 |
| 1 | 1 | 0 |
| 1 | 1 | 0 |
| 1 | 0 | 1 |
| 1 | 0 | 1 |
| 2 | 0 | 0 |
| 2 | 1 | 0 |
| 1 | 0 | 0 |
| 3 | 1 | 1 |
| 2 | 0 | 2 |
| 1 | 0 | 1 |
| 1 | 0 | 1 |
| 1 | 0 | 0 |
| 1 | 0 | 1 |
| 1 | 0 | 0 |
| 1 | 1 | 0 |
| 1 | 0 | 1 |
| 2 | 1 | 1 |
| 2 | 1 | 0 |
| 1 | 0 | 0 |
| 1 | 0 | 1 |
| 1 | 0 | 0 |
| 1 | 1 | 0 |
| 1 | 1 | 0 |
| 1 | 1 | 0 |
| 1 | 0 | 1 |
| 1 | 1 | 0 |
| 1 | 0 | 1 |
| 1 | 0 | 0 |
| 1 | 0 | 1 |
| 1 | 0 | 0 |
| 1 | 0 | 1 |
| 1 | 0 | 0 |
| 4 | 0 | 4 |
| 1 | 0 | 0 |
| 2 | 0 | 1 |
| 1 | 0 | 0 |
| 1 | 0 | 1 |
| 1 | 0 | 1 |
| 1 | 0 | 0 |
| 1 | 0 | 0 |
| 1 | 0 | 0 |
| 1 | 0 | 0 |
| 1 | 0 | 0 |
| 1 | 0 | 0 |
| 1 | 0 | 1 |
| 1 | 0 | 0 |
| 2 | 0 | 1 |
| 1 | 0 | 0 |
| 1 | 0 | 1 |
| 1 | 0 | 0 |
| 1 | 0 | 0 |
| 1 | 0 | 0 |
| 1 | 0 | 0 |
| 2 | 0 | 1 |
| 1 | 0 | 0 |
| 3 | 0 | 3 |
| 1 | 1 | 0 |
| 1 | 0 | 0 |
| 1 | 0 | 0 |
| 1 | 1 | 0 |
| 1 | 0 | 0 |
| 3 | 1 | 2 |



|   |   |   |
|---|---|---|
| 1 | 0 | 0 |
| 1 | 0 | 1 |
| 1 | 0 | 0 |
| 1 | 0 | 0 |
| 1 | 0 | 0 |
| 1 | 0 | 1 |
| 4 | 1 | 2 |
| 1 | 0 | 1 |
| 1 | 0 | 0 |
| 3 | 1 | 1 |
| 1 | 1 | 0 |
| 2 | 1 | 1 |
| 2 | 0 | 2 |
| 2 | 1 | 0 |
| 1 | 0 | 0 |
| 1 | 0 | 1 |
| 1 | 0 | 1 |
| 1 | 0 | 1 |
| 1 | 0 | 1 |
| 1 | 0 | 1 |
| 2 | 0 | 1 |
| 6 | 0 | 6 |
| 1 | 0 | 1 |
| 4 | 1 | 3 |
| 1 | 0 | 0 |
| 1 | 1 | 0 |
| 3 | 1 | 0 |
| 2 | 0 | 0 |
| 1 | 1 | 0 |
| 6 | 2 | 3 |
| 2 | 0 | 2 |
| 1 | 0 | 0 |
| 1 | 0 | 0 |
| 2 | 0 | 2 |
| 1 | 1 | 0 |
| 1 | 1 | 0 |
| 2 | 0 | 0 |
| 1 | 0 | 1 |
| 1 | 1 | 0 |
| 2 | 0 | 2 |
| 2 | 0 | 1 |
| 1 | 0 | 1 |
| 1 | 0 | 0 |
| 1 | 1 | 0 |
| 1 | 0 | 1 |
| 2 | 0 | 1 |
| 1 | 1 | 0 |
| 1 | 0 | 1 |
| 3 | 1 | 1 |
| 2 | 1 | 0 |
| 1 | 0 | 1 |
| 1 | 0 | 1 |

|   |   |   |
|---|---|---|
| 1 | 0 | 0 |
| 2 | 0 | 2 |
| 1 | 0 | 1 |
| 1 | 0 | 1 |
| 1 | 0 | 1 |
| 1 | 0 | 1 |
| 1 | 0 | 1 |
| 1 | 0 | 1 |
| 1 | 0 | 1 |
| 1 | 0 | 1 |
| 1 | 0 | 1 |
| 2 | 0 | 1 |
| 2 | 1 | 1 |
| 4 | 0 | 2 |
| 3 | 0 | 1 |
| 1 | 0 | 1 |
| 1 | 0 | 0 |
| 1 | 1 | 0 |
| 1 | 1 | 0 |
| 1 | 0 | 0 |
| 1 | 1 | 0 |
| 2 | 1 | 1 |
| 1 | 0 | 0 |
| 6 | 1 | 5 |
| 2 | 1 | 1 |
| 2 | 1 | 1 |
| 2 | 2 | 0 |
| 1 | 0 | 1 |
| 3 | 1 | 2 |
| 1 | 0 | 1 |
| 1 | 0 | 0 |
| 1 | 0 | 0 |
| 1 | 0 | 1 |
| 1 | 0 | 0 |
| 2 | 0 | 1 |
| 2 | 1 | 1 |
| 1 | 0 | 1 |
| 1 | 0 | 1 |
| 1 | 0 | 1 |
| 1 | 1 | 0 |
| 3 | 2 | 1 |
| 1 | 0 | 1 |
| 3 | 1 | 2 |
| 1 | 0 | 0 |
| 1 | 1 | 0 |
| 1 | 0 | 1 |
| 1 | 0 | 1 |
| 1 | 0 | 1 |
| 4 | 0 | 4 |
| 1 | 0 | 0 |
| 1 | 0 | 1 |
| 1 | 0 | 1 |
| 1 | 0 | 0 |
| 1 | 0 | 0 |

|   |   |   |
|---|---|---|
| 1 | 0 | 1 |
| 3 | 0 | 2 |
| 2 | 0 | 1 |
| 2 | 1 | 1 |
| 1 | 1 | 0 |
| 1 | 0 | 1 |
| 2 | 0 | 2 |
| 1 | 1 | 0 |
| 1 | 0 | 1 |
| 3 | 2 | 1 |
| 1 | 0 | 1 |
| 2 | 1 | 1 |
| 1 | 0 | 1 |
| 2 | 0 | 0 |
| 1 | 0 | 0 |
| 1 | 0 | 0 |
| 1 | 1 | 0 |
| 1 | 0 | 1 |
| 1 | 1 | 0 |
| 3 | 1 | 2 |
| 2 | 2 | 0 |
| 1 | 0 | 0 |
| 2 | 1 | 1 |
| 2 | 1 | 0 |
| 1 | 0 | 1 |
| 1 | 0 | 0 |
| 2 | 0 | 1 |
| 1 | 0 | 0 |
| 2 | 0 | 0 |
| 1 | 0 | 2 |
| 1 | 0 | 0 |
| 1 | 0 | 0 |
| 1 | 0 | 0 |
| 1 | 0 | 2 |
| 2 | 0 | 3 |
| 3 | 0 | 1 |
| 2 | 0 | 0 |
| 2 | 0 | 0 |
| 1 | 0 | 0 |
| 1 | 0 | 1 |
| 1 | 0 | 0 |
| 1 | 0 | 1 |
| 1 | 0 | 1 |
| 5 | 0 | 2 |
| 1 | 0 | 1 |
| 2 | 0 | 0 |
| 2 | 0 | 1 |
| 4 | 0 | 2 |
|   | 0 | 0 |
| 1 | 0 | 0 |
| 1 | 0 | 1 |
| 1 | 0 | 0 |
| 1 | 0 | 1 |
| 2 | 1 | 1 |
| 2 | 0 | 2 |
| 1 | 1 | 0 |

2\*

|   |   |   |
|---|---|---|
| 1 | 0 | 0 |
| 2 | 0 | 2 |
| 1 | 1 | 0 |
| 1 | 1 | 0 |
| 6 | 1 | 3 |
| 1 | 0 | 1 |
| 1 | 0 | 1 |
| 1 | 0 | 1 |
| 1 | 0 | 0 |
| 1 | 0 | 1 |
| 1 | 0 | 1 |
| 1 | 0 | 1 |
| 1 | 0 | 1 |
| 1 | 0 | 1 |
| 1 | 0 | 1 |
| 1 | 0 | 1 |
| 2 | 0 | 2 |
| 4 | 1 | 1 |
| 2 | 1 | 1 |
| 1 | 0 | 1 |
| 1 | 1 | 0 |
| 1 | 0 | 0 |
| 2 | 1 | 0 |
| 2 | 0 | 1 |
| 2 | 0 | 1 |
| 1 | 0 | 1 |
| 2 | 0 | 1 |
| 2 | 0 | 1 |
| 1 | 0 | 1 |
| 2 | 1 | 1 |
| 3 | 1 | 1 |
| 2 | 0 | 1 |
| 4 | 1 | 2 |
| 1 | 0 | 1 |
| 1 | 0 | 1 |
| 2 | 0 | 2 |
| 1 | 1 | 0 |
| 1 | 0 | 0 |
| 1 | 0 | 1 |
| 3 | 1 | 2 |
| 1 | 0 | 1 |
| 1 | 0 | 1 |
| 1 | 0 | 0 |
| 1 | 0 | 0 |
| 1 | 0 | 0 |
| 2 | 0 | 1 |
| 1 | 0 | 1 |
| 1 | 0 | 0 |
| 2 | 0 | 2 |
| 1 | 0 | 1 |
| 1 | 0 | 0 |
| 1 | 0 | 1 |
| 1 | 0 | 1 |
| 2 | 0 | 0 |
| 2 | 0 | 1 |
| 1 | 1 | 0 |

|   |   |   |
|---|---|---|
| 2 | 1 | 1 |
| 2 | 0 | 1 |
| 3 | 0 | 2 |
| 1 | 0 | 0 |
| 1 | 0 | 1 |
| 1 | 0 | 0 |
| 2 | 0 | 2 |
| 2 | 0 | 1 |
| 2 | 1 | 0 |
| 1 | 0 | 1 |
| 2 | 0 | 2 |
| 2 | 0 | 1 |
| 3 | 0 | 3 |
| 4 | 1 | 3 |
| 2 | 1 | 1 |
| 3 | 0 | 1 |
| 1 | 0 | 0 |
| 2 | 0 | 2 |
| 1 | 1 | 0 |
| 1 | 0 | 1 |
| 1 | 0 | 1 |
| 1 | 0 | 1 |
| 1 | 1 | 0 |
| 1 | 0 | 0 |
| 1 | 0 | 0 |
| 2 | 0 | 2 |
| 2 | 0 | 1 |
| 1 | 0 | 1 |
| 1 | 1 | 0 |
| 3 | 1 | 0 |
| 1 | 0 | 1 |
| 1 | 0 | 0 |
| 2 | 0 | 1 |
| 1 | 0 | 0 |
| 1 | 0 | 0 |
| 1 | 0 | 1 |
| 2 | 0 | 1 |
| 4 | 2 | 2 |
| 4 | 1 | 2 |
| 3 | 2 | 0 |
| 1 | 1 | 0 |
| 1 | 0 | 1 |
| 1 | 0 | 0 |
| 1 | 0 | 1 |
| 2 | 1 | 0 |
| 2 | 0 | 1 |
| 4 | 3 | 1 |
| 1 | 1 | 0 |
| 1 | 1 | 0 |
| 2 | 1 | 0 |
| 1 | 0 | 1 |
| 1 | 0 | 1 |
| 1 | 0 | 1 |
| 1 | 0 | 1 |
| 1 | 0 | 0 |

|   |   |   |
|---|---|---|
| 1 | 0 | 1 |
| 1 | 0 | 1 |
| 2 | 0 | 1 |
| 1 | 1 | 0 |
| 1 | 0 | 0 |
| 1 | 0 | 0 |
| 1 | 1 | 0 |
| 1 | 1 | 0 |
| 1 | 1 | 0 |
| 1 | 1 | 0 |
| 2 | 0 | 0 |
| 1 | 0 | 1 |
| 1 | 1 | 0 |
| 1 | 0 | 0 |
| 1 | 0 | 0 |
| 2 | 1 | 1 |
| 1 | 1 | 0 |
| 1 | 0 | 0 |
| 1 | 0 | 0 |
| 3 | 1 | 2 |
| 1 | 0 | 1 |
| 2 | 0 | 2 |
| 1 | 0 | 1 |
| 1 | 0 | 0 |
| 1 | 1 | 0 |
| 1 | 0 | 0 |
| 2 | 0 | 1 |
| 1 | 0 | 0 |
| 1 | 0 | 0 |
| 1 | 0 | 0 |
| 1 | 1 | 0 |
| 1 | 0 | 1 |
| 1 | 0 | 0 |
| 2 | 0 | 2 |
| 1 | 0 | 1 |
| 1 | 0 | 0 |
| 1 | 0 | 1 |
| 4 | 0 | 3 |
| 1 | 1 | 0 |
| 1 | 0 | 0 |
| 1 | 0 | 1 |
| 1 | 0 | 1 |
| 1 | 1 | 0 |
| 1 | 0 | 0 |
| 1 | 0 | 1 |
| 1 | 0 | 1 |
| 1 | 0 | 1 |
| 1 | 0 | 1 |
| 1 | 0 | 0 |
| 2 | 0 | 1 |
| 2 | 0 | 1 |
| 1 | 0 | 1 |
| 1 | 0 | 1 |
| 1 | 1 | 0 |



|   |   |   |
|---|---|---|
| 1 | 0 | 1 |
| 1 | 0 | 1 |
| 3 | 1 | 2 |
| 1 | 0 | 1 |
| 2 | 0 | 0 |
| 2 | 1 | 0 |
| 2 | 1 | 1 |
| 2 | 0 | 1 |
| 1 | 0 | 1 |
| 1 | 0 | 1 |
| 1 | 0 | 1 |
| 1 | 0 | 0 |
| 4 | 0 | 3 |
| 2 | 0 | 2 |
| 1 | 0 | 0 |
| 1 | 0 | 1 |
| 1 | 0 | 1 |
| 1 | 0 | 1 |
| 1 | 0 | 1 |
| 1 | 0 | 0 |
| 1 | 0 | 1 |
| 1 | 0 | 1 |
| 1 | 0 | 1 |
| 2 | 1 | 0 |
| 1 | 0 | 1 |
| 1 | 0 | 0 |
| 1 | 0 | 1 |
| 1 | 0 | 1 |
| 1 | 0 | 0 |
| 2 | 0 | 1 |
| 2 | 2 | 0 |
| 1 | 0 | 1 |
| 1 | 0 | 0 |
| 1 | 1 | 0 |
| 1 | 0 | 1 |
| 1 | 0 | 1 |
| 2 | 0 | 1 |
| 1 | 0 | 1 |
| 1 | 0 | 1 |
| 1 | 0 | 1 |
| 1 | 1 | 0 |
| 2 | 1 | 1 |
| 2 | 1 | 0 |
| 2 | 1 | 1 |
| 2 | 0 | 1 |
| 1 | 1 | 0 |
| 1 | 0 | 1 |
| 1 | 0 | 1 |
| 1 | 0 | 1 |
| 1 | 0 | 1 |
| 1 | 0 | 2 |
| 2 | 0 | 2 |
| 1 | 0 | 1 |
| 1 | 1 | 0 |
| 2 | 0 | 2 |
| 2 | 0 | 0 |
| 1 | 0 | 0 |
| 1 | 0 | 0 |
| 1 | 0 | 0 |
| 1 | 0 | 0 |
| 1 | 1 | 0 |

3\*

|   |   |   |
|---|---|---|
| 1 | 0 | 1 |
| 1 | 0 | 0 |
| 1 | 0 | 1 |
| 1 | 1 | 0 |
| 1 | 1 | 0 |
| 3 | 2 | 1 |
| 3 | 1 | 1 |
| 1 | 0 | 0 |
| 3 | 2 | 1 |
| 1 | 0 | 1 |
| 1 | 0 | 0 |
| 3 | 0 | 3 |
| 2 | 0 | 2 |
| 2 | 1 | 1 |
| 2 | 1 | 1 |
| 2 | 0 | 1 |
| 1 | 0 | 1 |
| 1 | 0 | 0 |
| 1 | 0 | 1 |
| 1 | 0 | 0 |
| 1 | 0 | 1 |
| 1 | 0 | 1 |
| 1 | 0 | 1 |
| 1 | 0 | 1 |
| 1 | 0 | 1 |
| 1 | 0 | 0 |
| 1 | 0 | 1 |
| 1 | 0 | 1 |
| 1 | 0 | 0 |
| 1 | 1 | 0 |
| 2 | 0 | 1 |
| 2 | 0 | 2 |
| 2 | 0 | 1 |
| 1 | 0 | 0 |
| 1 | 0 | 0 |
| 1 | 0 | 0 |
| 1 | 0 | 1 |
| 1 | 0 | 0 |
| 1 | 1 | 0 |
| 3 | 0 | 2 |
| 1 | 0 | 1 |
| 1 | 0 | 0 |
| 1 | 1 | 0 |
| 1 | 0 | 1 |
| 1 | 0 | 0 |
| 1 | 0 | 1 |
| 2 | 1 | 1 |
| 1 | 1 | 0 |
| 1 | 0 | 1 |
| 1 | 1 | 0 |
| 1 | 0 | 1 |
| 2 | 0 | 2 |
| 1 | 0 | 0 |

|   |   |   |
|---|---|---|
| 1 | 0 | 1 |
| 2 | 0 | 1 |
| 2 | 0 | 2 |
| 1 | 0 | 1 |
| 1 | 0 | 0 |
| 1 | 0 | 1 |
| 1 | 0 | 0 |
| 2 | 0 | 1 |
| 1 | 0 | 1 |
| 1 | 0 | 0 |
| 2 | 1 | 1 |
| 2 | 0 | 1 |
| 1 | 1 | 0 |
| 1 | 0 | 0 |
| 1 | 0 | 0 |
| 3 | 1 | 1 |
| 2 | 0 | 1 |
| 1 | 0 | 1 |
| 1 | 0 | 0 |
| 1 | 0 | 1 |
| 1 | 0 | 0 |
| 1 | 0 | 1 |
| 1 | 0 | 0 |
| 1 | 0 | 1 |
| 1 | 0 | 1 |
| 1 | 0 | 0 |
| 3 | 0 | 2 |
| 4 | 0 | 3 |
| 2 | 1 | 1 |
| 2 | 0 | 1 |
| 3 | 1 | 1 |
| 1 | 0 | 0 |
| 1 | 0 | 0 |
| 1 | 0 | 0 |
| 2 | 0 | 1 |
| 2 | 1 | 1 |
| 1 | 1 | 0 |
| 1 | 0 | 0 |
| 2 | 0 | 0 |
| 2 | 0 | 0 |
| 2 | 0 | 2 |
| 2 | 0 | 1 |
| 2 | 0 | 2 |
| 1 | 0 | 0 |
| 1 | 0 | 1 |
| 5 | 2 | 2 |
| 1 | 0 | 1 |
| 1 | 0 | 1 |
| 1 | 0 | 0 |
| 2 | 0 | 1 |
| 1 | 0 | 0 |
| 1 | 0 | 0 |
| 1 | 1 | 0 |
| 3 | 0 | 2 |

|   |   |   |
|---|---|---|
| 1 | 0 | 1 |
| 1 | 1 | 0 |
| 1 | 0 | 1 |
| 3 | 0 | 3 |
| 3 | 0 | 3 |
| 3 | 1 | 1 |
| 1 | 0 | 1 |
| 1 | 0 | 1 |
| 1 | 0 | 0 |
| 1 | 0 | 1 |
| 1 | 0 | 0 |
| 3 | 0 | 2 |
| 2 | 1 | 0 |
| 2 | 0 | 1 |
| 4 | 0 | 4 |
| 1 | 0 | 0 |
| 1 | 0 | 1 |
| 1 | 1 | 0 |
| 1 | 0 | 1 |
| 1 | 0 | 0 |
| 4 | 1 | 2 |
| 1 | 0 | 1 |
| 1 | 0 | 0 |
| 1 | 0 | 1 |
| 2 | 1 | 1 |
| 1 | 0 | 1 |
| 6 | 2 | 3 |
| 3 | 1 | 2 |
| 4 | 0 | 4 |
| 2 | 2 | 0 |
| 2 | 0 | 2 |
| 1 | 0 | 1 |
| 1 | 1 | 0 |
| 1 | 0 | 0 |
| 1 | 1 | 0 |
| 5 | 1 | 4 |
| 1 | 1 | 0 |
| 1 | 0 | 1 |
| 4 | 0 | 4 |
| 1 | 0 | 1 |
| 1 | 0 | 0 |
| 1 | 0 | 0 |
| 1 | 0 | 0 |
| 1 | 0 | 1 |
| 1 | 0 | 0 |
| 3 | 1 | 3 |
| 2 | 1 | 1 |
| 1 | 0 | 0 |
| 1 | 0 | 1 |
| 1 | 0 | 0 |
| 1 | 0 | 0 |
| 1 | 0 | 1 |
| 1 | 0 | 0 |
| 1 | 0 | 1 |
| 1 | 0 | 0 |
| 1 | 1 | 0 |

|    |   |    |
|----|---|----|
| 2  | 0 | 2  |
| 1  | 0 | 1  |
| 1  | 0 | 1  |
| 2  | 0 | 1  |
| 1  | 0 | 0  |
| 2  | 1 | 1  |
| 2  | 1 | 1  |
| 1  | 0 | 0  |
| 1  | 0 | 0  |
| 1  | 0 | 0  |
| 2  | 0 | 2  |
| 1  | 0 | 1  |
| 3  | 0 | 2  |
| 1  | 0 | 0  |
| 2  | 0 | 0  |
| 1  | 0 | 1  |
| 7  | 0 | 7  |
| 1  | 0 | 0  |
| 1  | 0 | 0  |
| 3  | 0 | 3  |
| 1  | 0 | 1  |
| 1  | 1 | 0  |
| 1  | 0 | 1  |
| 1  | 0 | 1  |
| 1  | 0 | 0  |
| 1  | 1 | 0  |
| 2  | 0 | 2  |
| 10 | 0 | 10 |
| 1  | 1 | 0  |
| 1  | 0 | 0  |
| 2  | 0 | 1  |
| 4  | 0 | 1  |
| 2  | 1 | 1  |
| 6  | 0 | 4  |
| 1  | 0 | 0  |
| 1  | 0 | 1  |
| 1  | 0 | 0  |
| 2  | 0 | 1  |
| 1  | 1 | 0  |
| 2  | 0 | 2  |
| 1  | 0 | 1  |
| 2  | 0 | 0  |
| 2  | 1 | 1  |
| 1  | 0 | 1  |
| 2  | 0 | 2  |
| 2  | 0 | 2  |
| 1  | 0 | 1  |
| 1  | 1 | 0  |
| 1  | 0 | 1  |
| 1  | 1 | 0  |
| 1  | 0 | 1  |
| 2  | 0 | 1  |
| 1  | 1 | 0  |
| 1  | 0 | 1  |

|   |   |   |
|---|---|---|
| 1 | 0 | 0 |
| 4 | 1 | 3 |
| 8 | 2 | 4 |
| 2 | 0 | 2 |
| 1 | 0 | 0 |
| 1 | 0 | 1 |
| 2 | 0 | 2 |
| 1 | 0 | 0 |
| 1 | 0 | 1 |
| 1 | 0 | 1 |
| 1 | 0 | 1 |
| 1 | 1 | 0 |
| 1 | 0 | 1 |
| 1 | 0 | 0 |
| 4 | 1 | 1 |
| 2 | 0 | 0 |
| 1 | 0 | 1 |
| 2 | 0 | 2 |
| 2 | 0 | 2 |
| 2 | 0 | 0 |
| 2 | 0 | 1 |
| 1 | 0 | 1 |
| 1 | 0 | 0 |
| 2 | 0 | 1 |
| 1 | 0 | 1 |
| 1 | 0 | 1 |
| 1 | 0 | 1 |
| 2 | 0 | 2 |
| 2 | 0 | 1 |
| 1 | 0 | 1 |
| 1 | 0 | 1 |
| 3 | 0 | 3 |
| 1 | 0 | 1 |
| 3 | 0 | 2 |
| 2 | 0 | 1 |
| 1 | 0 | 0 |
| 1 | 0 | 0 |
| 1 | 0 | 1 |
| 1 | 0 | 0 |
| 1 | 0 | 0 |
| 1 | 0 | 1 |
| 1 | 1 | 0 |
| 1 | 1 | 0 |
| 2 | 2 | 0 |
| 3 | 1 | 0 |
| 3 | 0 | 3 |
| 2 | 0 | 2 |
| 1 | 0 | 1 |
| 1 | 0 | 0 |
| 1 | 1 | 0 |
| 4 | 0 | 1 |
| 1 | 0 | 0 |
| 3 | 0 | 3 |
| 2 | 0 | 1 |

|   |   |   |
|---|---|---|
| 3 | 0 | 2 |
| 2 | 2 | 0 |
| 1 | 0 | 1 |
| 1 | 1 | 0 |
| 2 | 1 | 1 |
| 3 | 0 | 3 |
| 1 | 0 | 0 |
| 1 | 0 | 0 |
| 2 | 1 | 1 |
| 1 | 0 | 0 |
| 1 | 0 | 1 |
| 1 | 0 | 1 |
| 2 | 0 | 1 |
| 1 | 0 | 0 |
| 1 | 0 | 1 |
| 2 | 0 | 0 |
| 1 | 0 | 1 |
| 2 | 1 | 1 |
| 1 | 0 | 1 |
| 1 | 0 | 0 |
| 1 | 0 | 0 |
| 2 | 0 | 1 |
| 2 | 1 | 0 |
| 1 | 0 | 0 |
| 1 | 0 | 1 |
| 1 | 0 | 1 |
| 2 | 0 | 1 |
| 1 | 0 | 1 |
| 1 | 0 | 0 |
| 1 | 0 | 1 |
| 2 | 0 | 1 |
| 1 | 0 | 0 |
| 1 | 1 | 0 |
| 1 | 0 | 0 |
| 1 | 0 | 1 |
| 3 | 0 | 1 |
| 1 | 0 | 1 |
| 2 | 0 | 1 |
| 2 | 0 | 1 |
| 1 | 0 | 1 |
| 1 | 0 | 1 |
| 1 | 0 | 0 |
| 1 | 0 | 1 |
| 2 | 0 | 2 |
| 4 | 0 | 4 |
| 2 | 0 | 1 |
| 2 | 0 | 1 |
| 1 | 0 | 1 |
| 1 | 0 | 1 |
| 1 | 0 | 1 |
| 1 | 0 | 0 |
| 2 | 0 | 2 |
| 1 | 0 | 1 |
| 1 | 0 | 1 |
| 4 | 0 | 1 |
| 1 | 0 | 0 |
| 3 | 0 | 2 |
| 1 | 0 | 1 |
| 1 | 0 | 0 |





|   |   |   |
|---|---|---|
| 1 | 0 | 1 |
| 1 | 0 | 1 |
| 1 | 0 | 1 |
| 3 | 1 | 1 |
| 2 | 0 | 1 |
| 1 | 0 | 0 |
| 1 | 0 | 1 |
| 2 | 1 | 0 |
| 1 | 0 | 0 |
| 1 | 0 | 0 |
| 1 | 1 | 0 |
| 1 | 0 | 0 |
| 4 | 1 | 2 |
| 1 | 0 | 1 |
| 1 | 0 | 1 |
| 1 | 0 | 1 |
| 1 | 0 | 1 |
| 2 | 0 | 2 |
| 1 | 0 | 1 |
| 1 | 0 | 1 |
| 1 | 0 | 1 |
| 1 | 0 | 0 |
| 1 | 0 | 1 |
| 4 | 1 | 1 |
| 1 | 0 | 1 |
| 2 | 1 | 1 |
| 2 | 0 | 1 |
| 1 | 0 | 1 |
| 1 | 0 | 1 |
| 2 | 0 | 1 |
| 1 | 0 | 1 |
| 1 | 0 | 1 |
| 1 | 0 | 1 |
| 1 | 0 | 1 |
| 1 | 0 | 0 |
| 1 | 1 | 0 |
| 4 | 2 | 1 |
| 1 | 1 | 0 |
| 1 | 0 | 0 |
| 2 | 0 | 0 |
| 1 | 0 | 0 |
| 2 | 0 | 0 |
| 1 | 0 | 0 |
| 1 | 0 | 0 |
| 1 | 0 | 0 |
| 1 | 0 | 0 |
| 1 | 0 | 0 |
| 1 | 0 | 0 |
| 1 | 0 | 0 |
| 2 | 2 | 1 |
| 2 | 0 | 0 |
| 2 | 0 | 2 |
| 1 | 1 | 0 |
| 1 | 0 | 1 |
| 3 | 1 | 1 |

|   |   |   |
|---|---|---|
| 1 | 0 | 0 |
| 1 | 0 | 1 |
| 1 | 1 | 0 |
| 1 | 1 | 0 |
| 1 | 0 | 1 |
| 5 | 0 | 4 |
| 2 | 0 | 1 |
| 2 | 0 | 2 |
| 1 | 0 | 1 |
| 1 | 0 | 0 |
| 1 | 0 | 1 |
| 2 | 1 | 1 |
| 1 | 1 | 0 |
| 3 | 2 | 0 |
| 1 | 0 | 0 |
| 1 | 1 | 0 |
| 1 | 0 | 1 |
| 2 | 1 | 1 |
| 2 | 0 | 1 |
| 2 | 0 | 1 |
| 1 | 0 | 1 |
| 1 | 0 | 1 |
| 1 | 0 | 1 |
| 1 | 0 | 0 |
| 1 | 0 | 1 |
| 2 | 1 | 0 |
| 1 | 1 | 0 |
| 1 | 0 | 1 |
| 1 | 0 | 0 |
| 1 | 0 | 0 |
| 1 | 1 | 0 |
| 1 | 0 | 0 |
| 1 | 0 | 0 |
| 1 | 0 | 1 |
| 3 | 1 | 2 |
| 1 | 0 | 0 |
| 2 | 1 | 0 |
| 1 | 0 | 0 |
| 1 | 0 | 1 |
| 1 | 0 | 1 |
| 2 | 0 | 2 |
| 2 | 0 | 2 |
| 1 | 0 | 0 |
| 1 | 0 | 0 |
| 1 | 0 | 1 |
| 3 | 1 | 2 |
| 1 | 0 | 0 |
| 2 | 1 | 1 |
| 2 | 0 | 2 |
| 3 | 0 | 1 |
| 1 | 0 | 0 |
| 1 | 0 | 0 |
| 1 | 0 | 1 |
| 2 | 0 | 2 |

|   |   |   |
|---|---|---|
| 1 | 0 | 1 |
| 1 | 0 | 1 |
| 1 | 0 | 0 |
| 1 | 0 | 1 |
| 1 | 0 | 1 |
| 4 | 0 | 2 |
| 2 | 0 | 1 |
| 1 | 0 | 0 |
| 1 | 0 | 0 |
| 1 | 0 | 0 |
| 1 | 0 | 0 |
| 3 | 0 | 1 |
| 1 | 0 | 1 |
| 2 | 0 | 1 |
| 1 | 0 | 1 |
| 3 | 2 | 1 |
| 1 | 0 | 0 |
| 2 | 0 | 0 |
| 1 | 0 | 1 |
| 1 | 0 | 1 |
| 1 | 0 | 1 |
| 1 | 0 | 0 |
| 2 | 1 | 1 |
| 1 | 1 | 0 |
| 1 | 1 | 0 |
| 1 | 0 | 0 |
| 1 | 1 | 0 |
| 1 | 0 | 0 |
| 1 | 0 | 1 |
| 2 | 1 | 1 |
| 1 | 0 | 1 |
| 2 | 0 | 1 |
| 2 | 2 | 0 |
| 2 | 0 | 2 |
| 1 | 0 | 0 |
| 1 | 1 | 0 |
| 1 | 0 | 1 |
| 1 | 0 | 0 |
| 1 | 0 | 1 |
| 1 | 0 | 1 |
| 1 | 0 | 0 |
| 1 | 0 | 1 |
| 1 | 0 | 1 |
| 1 | 0 | 1 |
| 1 | 0 | 0 |
| 1 | 0 | 1 |
| 2 | 2 | 0 |
| 1 | 0 | 0 |
| 2 | 0 | 1 |
| 3 | 0 | 2 |
| 2 | 0 | 1 |
| 3 | 0 | 2 |
| 3 | 0 | 3 |
| 1 | 0 | 0 |

|   |   |   |
|---|---|---|
| 1 | 1 | 0 |
| 1 | 0 | 1 |
| 1 | 0 | 1 |
| 1 | 0 | 0 |
| 1 | 0 | 0 |
| 1 | 0 | 0 |
| 1 | 0 | 0 |
| 3 | 0 | 3 |
| 3 | 0 | 3 |
| 2 | 0 | 2 |
| 3 | 0 | 1 |
| 1 | 0 | 1 |
| 1 | 1 | 0 |
| 1 | 1 | 0 |
| 1 | 0 | 0 |
| 1 | 0 | 1 |
| 1 | 0 | 1 |
| 1 | 0 | 0 |
| 1 | 1 | 0 |
| 1 | 0 | 1 |
| 1 | 0 | 0 |
| 1 | 0 | 1 |
| 1 | 1 | 0 |
| 1 | 0 | 1 |
| 1 | 0 | 0 |
| 9 | 1 | 5 |
| 4 | 2 | 2 |
| 3 | 0 | 2 |
| 3 | 1 | 2 |
| 2 | 1 | 1 |
| 3 | 1 | 2 |
| 1 | 0 | 0 |
| 2 | 0 | 1 |
| 1 | 1 | 0 |
| 1 | 0 | 0 |
| 1 | 0 | 0 |
| 2 | 0 | 2 |
| 1 | 0 | 1 |
| 1 | 1 | 0 |
| 1 | 0 | 0 |
| 3 | 0 | 3 |
| 1 | 1 | 0 |
| 1 | 0 | 1 |
| 1 | 0 | 0 |
| 1 | 0 | 1 |
| 1 | 0 | 1 |
| 2 | 1 | 0 |
| 3 | 0 | 1 |
| 2 | 0 | 2 |
| 2 | 1 | 0 |
| 1 | 0 | 1 |
| 1 | 0 | 0 |
| 1 | 1 | 0 |

|   |   |   |
|---|---|---|
| 1 | 0 | 0 |
| 1 | 0 | 0 |
| 1 | 1 | 0 |
| 1 | 0 | 1 |
| 1 | 0 | 1 |
| 1 | 0 | 0 |
| 2 | 0 | 1 |
| 1 | 0 | 0 |
| 2 | 1 | 0 |
| 1 | 0 | 1 |
| 1 | 0 | 0 |
| 1 | 1 | 0 |
| 1 | 0 | 0 |
| 1 | 0 | 1 |
| 1 | 0 | 1 |
| 1 | 0 | 1 |
| 1 | 0 | 1 |
| 1 | 0 | 0 |
| 1 | 0 | 1 |
| 2 | 0 | 0 |
| 1 | 0 | 1 |
| 1 | 0 | 0 |
| 1 | 0 | 0 |
| 1 | 0 | 1 |
| 2 | 0 | 1 |
| 1 | 0 | 0 |
| 1 | 0 | 1 |
| 6 | 0 | 5 |
| 1 | 0 | 0 |
| 2 | 0 | 1 |
| 2 | 1 | 1 |
| 2 | 1 | 0 |
| 1 | 0 | 1 |
| 2 | 0 | 2 |
| 1 | 0 | 1 |
| 1 | 0 | 0 |
| 4 | 0 | 4 |
| 1 | 0 | 1 |
| 1 | 0 | 0 |
| 1 | 0 | 1 |
| 1 | 0 | 1 |
| 1 | 0 | 1 |
| 1 | 0 | 1 |
| 1 | 0 | 1 |
| 1 | 1 | 0 |
| 2 | 0 | 1 |
| 1 | 1 | 0 |
| 1 | 0 | 0 |
| 3 | 0 | 3 |
| 1 | 0 | 1 |
| 1 | 0 | 1 |
| 1 | 0 | 1 |

2\*

|   |   |   |
|---|---|---|
| 1 | 0 | 0 |
| 2 | 1 | 0 |
| 1 | 0 | 1 |
| 1 | 0 | 1 |
| 1 | 0 | 1 |
| 1 | 1 | 0 |
| 3 | 0 | 2 |
| 1 | 1 | 0 |
| 1 | 0 | 1 |
| 6 | 2 | 3 |
| 2 | 1 | 0 |
| 1 | 0 | 0 |
| 1 | 0 | 1 |
| 2 | 1 | 1 |
| 2 | 2 | 0 |
| 1 | 0 | 0 |
|   | 1 | 0 |
| 1 | 1 | 0 |
| 1 | 0 | 1 |
| 1 | 0 | 0 |
| 1 | 0 | 0 |
| 1 | 1 | 0 |
| 2 | 0 | 1 |
| 1 | 0 | 1 |
| 1 | 0 | 1 |
| 1 | 0 | 1 |
| 2 | 0 | 2 |
| 2 | 1 | 0 |
| 1 | 0 | 1 |
| 2 | 0 | 2 |
| 1 | 0 | 0 |
| 1 | 0 | 1 |
| 4 | 0 | 1 |
| 1 | 0 | 0 |
| 2 | 0 | 1 |
| 2 | 0 | 2 |
| 2 | 0 | 2 |
| 2 | 0 | 1 |
| 4 | 0 | 1 |
| 2 | 0 | 1 |
| 1 | 0 | 0 |
| 3 | 1 | 2 |
| 2 | 0 | 1 |
| 3 | 1 | 1 |
| 3 | 0 | 3 |
| 1 | 0 | 1 |
| 1 | 0 | 0 |
| 1 | 0 | 1 |
| 1 | 0 | 0 |
| 1 | 0 | 0 |
| 1 | 0 | 0 |
| 1 | 0 | 0 |
| 1 | 0 | 0 |
| 1 | 0 | 0 |
| 1 | 0 | 1 |
| 2 | 0 | 1 |

|   |   |   |
|---|---|---|
| 1 | 0 | 0 |
| 2 | 1 | 1 |
| 1 | 1 | 0 |
| 2 | 0 | 1 |
| 2 | 0 | 2 |
| 1 | 0 | 1 |
| 1 | 0 | 0 |
| 1 | 0 | 0 |
| 4 | 1 | 3 |
| 1 | 0 | 0 |
| 1 | 0 | 1 |
| 2 | 0 | 2 |
| 1 | 0 | 0 |
| 1 | 0 | 0 |
| 2 | 1 | 0 |
| 2 | 0 | 2 |
| 3 | 0 | 2 |
| 1 | 0 | 1 |
| 1 | 0 | 1 |
| 1 | 0 | 1 |
| 1 | 0 | 1 |
| 1 | 0 | 1 |
| 2 | 1 | 1 |
| 1 | 0 | 1 |
| 1 | 0 | 1 |
| 1 | 0 | 0 |
| 2 | 0 | 1 |
| 1 | 0 | 0 |
| 1 | 1 | 0 |
| 4 | 0 | 3 |
| 1 | 0 | 1 |
| 1 | 0 | 0 |
| 2 | 0 | 2 |
| 2 | 0 | 0 |
| 1 | 0 | 1 |
| 1 | 0 | 1 |
| 1 | 0 | 1 |
| 1 | 0 | 0 |
| 1 | 0 | 1 |
| 1 | 0 | 1 |
| 1 | 0 | 1 |
| 2 | 1 | 1 |
| 1 | 0 | 1 |
| 1 | 0 | 1 |
| 1 | 0 | 1 |
| 1 | 0 | 1 |
| 2 | 0 | 2 |
| 1 | 0 | 1 |
| 1 | 0 | 1 |
| 2 | 1 | 1 |
| 3 | 0 | 2 |
| 1 | 0 | 1 |

|   |   |   |
|---|---|---|
| 1 | 0 | 1 |
| 1 | 0 | 0 |
| 1 | 0 | 0 |
| 2 | 0 | 2 |
| 2 | 1 | 0 |
| 1 | 0 | 1 |
| 1 | 0 | 1 |
| 1 | 0 | 1 |
| 1 | 0 | 0 |
| 1 | 0 | 0 |
| 2 | 0 | 1 |
| 1 | 0 | 0 |
| 1 | 0 | 0 |
| 3 | 0 | 1 |
| 1 | 0 | 1 |
| 1 | 0 | 1 |
| 1 | 0 | 0 |
| 3 | 0 | 1 |
| 1 | 0 | 1 |
| 1 | 0 | 1 |
| 1 | 0 | 1 |
| 1 | 0 | 1 |
| 2 | 0 | 0 |
| 1 | 0 | 1 |
| 1 | 0 | 1 |
| 2 | 0 | 1 |
| 1 | 0 | 1 |
| 3 | 1 | 1 |
| 1 | 1 | 0 |
| 2 | 0 | 1 |
| 1 | 0 | 1 |
| 1 | 0 | 0 |
| 1 | 0 | 1 |
| 1 | 0 | 1 |
| 1 | 0 | 0 |
| 2 | 0 | 1 |
| 1 | 0 | 1 |
| 1 | 0 | 1 |
| 1 | 0 | 1 |
| 1 | 0 | 0 |
| 1 | 0 | 1 |
| 2 | 1 | 1 |
| 1 | 1 | 0 |
| 1 | 0 | 0 |
| 2 | 0 | 1 |
| 1 | 0 | 1 |
| 1 | 1 | 0 |
| 1 | 0 | 1 |
| 1 | 0 | 0 |
| 1 | 0 | 0 |
| 1 | 0 | 1 |
| 1 | 1 | 0 |
| 1 | 1 | 0 |



|   |   |   |
|---|---|---|
| 1 | 0 | 0 |
| 1 | 0 | 1 |
| 2 | 1 | 1 |
| 2 | 0 | 1 |
| 1 | 1 | 0 |
| 1 | 1 | 0 |
| 1 | 0 | 1 |
| 1 | 0 | 1 |
| 2 | 0 | 2 |
| 1 | 0 | 1 |
| 2 | 0 | 2 |
| 1 | 0 | 1 |
| 1 | 0 | 1 |
| 1 | 0 | 0 |
| 1 | 0 | 0 |
| 1 | 0 | 1 |
| 4 | 0 | 1 |
| 1 | 0 | 1 |
| 4 | 0 | 2 |
| 3 | 0 | 2 |
| 1 | 0 | 0 |
| 1 | 0 | 1 |
| 1 | 0 | 1 |
| 1 | 0 | 1 |
| 2 | 0 | 2 |
| 1 | 0 | 0 |
| 2 | 1 | 1 |
| 1 | 0 | 0 |
| 3 | 0 | 2 |
| 1 | 0 | 1 |
| 1 | 0 | 0 |
| 1 | 0 | 0 |
| 2 | 0 | 1 |
| 1 | 0 | 1 |
| 1 | 1 | 0 |
| 1 | 0 | 0 |
| 1 | 0 | 1 |
| 1 | 1 | 0 |
| 1 | 0 | 0 |
| 2 | 0 | 1 |
| 1 | 0 | 1 |
| 2 | 2 | 0 |
| 1 | 0 | 1 |
| 1 | 0 | 0 |
| 2 | 0 | 2 |
| 2 | 0 | 2 |
| 2 | 1 | 0 |
| 1 | 0 | 1 |
| 1 | 0 | 0 |
| 1 | 0 | 0 |
| 1 | 0 | 0 |
| 1 | 0 | 1 |
| 1 | 0 | 1 |



|   |   |   |
|---|---|---|
| 1 | 0 | 0 |
| 1 | 0 | 0 |
| 1 | 0 | 1 |
| 1 | 0 | 0 |
| 2 | 0 | 1 |
| 1 | 1 | 0 |
| 2 | 0 | 2 |
| 1 | 0 | 0 |
| 2 | 0 | 1 |
| 1 | 0 | 0 |
| 1 | 0 | 1 |
| 1 | 0 | 0 |
| 1 | 0 | 1 |
| 1 | 0 | 0 |
| 1 | 0 | 1 |
| 1 | 0 | 0 |
| 1 | 0 | 1 |
| 1 | 0 | 1 |
| 3 | 1 | 1 |
| 1 | 0 | 1 |
| 1 | 0 | 0 |
| 1 | 0 | 1 |
| 2 | 0 | 1 |
| 1 | 0 | 1 |
| 1 | 0 | 0 |
| 1 | 0 | 1 |
| 1 | 0 | 1 |
| 1 | 1 | 0 |
| 2 | 1 | 1 |
| 3 | 0 | 1 |
| 1 | 0 | 1 |
| 1 | 0 | 0 |
| 1 | 0 | 1 |
| 2 | 0 | 1 |
| 1 | 0 | 0 |
| 1 | 0 | 0 |
| 2 | 1 | 0 |
| 1 | 0 | 0 |
| 2 | 0 | 0 |
| 2 | 0 | 2 |
| 1 | 0 | 1 |
| 1 | 0 | 1 |
| 2 | 0 | 1 |
| 1 | 0 | 1 |
| 3 | 0 | 0 |
| 1 | 0 | 0 |
| 1 | 0 | 0 |
| 2 | 0 | 1 |
| 1 | 1 | 0 |
| 2 | 0 | 1 |
| 3 | 0 | 3 |
| 2 | 0 | 2 |
| 1 | 1 | 0 |



|   |   |   |
|---|---|---|
| 1 | 1 | 0 |
| 1 | 0 | 0 |
| 1 | 1 | 0 |
| 1 | 0 | 0 |
| 1 | 0 | 0 |
| 2 | 0 | 0 |
| 1 | 0 | 0 |
| 1 | 0 | 1 |
| 2 | 0 | 2 |
| 1 | 1 | 0 |
| 1 | 0 | 1 |
| 2 | 1 | 1 |
| 4 | 0 | 3 |
| 3 | 1 | 1 |
| 1 | 0 | 1 |
| 3 | 0 | 2 |
| 1 | 0 | 1 |
| 1 | 0 | 1 |
| 1 | 0 | 1 |
| 1 | 1 | 0 |
| 1 | 0 | 0 |
| 1 | 1 | 0 |
| 2 | 0 | 1 |
| 1 | 0 | 1 |
| 2 | 0 | 1 |
| 2 | 1 | 1 |
| 2 | 0 | 2 |
| 1 | 1 | 0 |
| 1 | 0 | 0 |
| 1 | 0 | 1 |
| 1 | 1 | 0 |
| 1 | 0 | 1 |
| 1 | 0 | 1 |
| 1 | 0 | 0 |
| 2 | 0 | 1 |
| 1 | 1 | 0 |
| 2 | 1 | 0 |
| 1 | 0 | 0 |
| 1 | 0 | 0 |
| 3 | 0 | 1 |
| 1 | 0 | 1 |
| 3 | 2 | 1 |
| 1 | 0 | 0 |
| 1 | 0 | 1 |
| 1 | 0 | 1 |
| 1 | 0 | 3 |
| 1 | 0 | 0 |
| 1 | 0 | 0 |
| 1 | 0 | 0 |
| 2 | 0 | 1 |
| 1 | 0 | 0 |
| 1 | 0 | 1 |
| 1 | 0 | 1 |
| 1 | 0 | 1 |

|   |   |   |
|---|---|---|
| 1 | 0 | 1 |
| 2 | 1 | 0 |
| 1 | 0 | 1 |
| 1 | 0 | 1 |
| 1 | 0 | 1 |
| 1 | 0 | 1 |
| 1 | 1 | 0 |
| 1 | 0 | 0 |
| 1 | 0 | 0 |
| 1 | 0 | 1 |
| 1 | 1 | 0 |
| 1 | 0 | 1 |
| 1 | 0 | 0 |
| 1 | 0 | 0 |
| 1 | 0 | 1 |
| 2 | 0 | 1 |
| 1 | 0 | 0 |
| 1 | 0 | 1 |
| 2 | 1 | 0 |
| 1 | 0 | 1 |
| 1 | 0 | 0 |
| 1 | 0 | 0 |
| 1 | 0 | 1 |
| 2 | 1 | 0 |
| 2 | 1 | 0 |
| 1 | 0 | 1 |
| 1 | 0 | 0 |
| 1 | 0 | 1 |
| 1 | 0 | 0 |
| 1 | 0 | 0 |
| 1 | 0 | 1 |
| 1 | 0 | 0 |
| 1 | 0 | 0 |
| 1 | 1 | 0 |
| 1 | 0 | 0 |
| 1 | 0 | 0 |
| 1 | 1 | 0 |
| 1 | 0 | 1 |
| 1 | 0 | 0 |
| 1 | 0 | 1 |
| 1 | 0 | 1 |
| 2 | 1 | 1 |
| 2 | 1 | 1 |

|   |   |   |
|---|---|---|
| 1 | 0 | 1 |
| 2 | 0 | 1 |
| 1 | 1 | 0 |
| 1 | 1 | 0 |
| 1 | 0 | 1 |
| 1 | 0 | 1 |
| 1 | 0 | 0 |
| 1 | 0 | 0 |
| 1 | 0 | 0 |
| 1 | 1 | 0 |
| 1 | 0 | 0 |
| 1 | 0 | 0 |
| 1 | 0 | 0 |
| 2 | 0 | 1 |
| 2 | 0 | 0 |
| 2 | 0 | 2 |
| 2 | 0 | 0 |
| 1 | 0 | 1 |
| 1 | 0 | 0 |
| 1 | 1 | 0 |
| 1 | 0 | 1 |
| 4 | 1 | 2 |
| 1 | 0 | 1 |
| 1 | 0 | 1 |
| 1 | 0 | 0 |
| 1 | 0 | 0 |
| 1 | 0 | 1 |
| 1 | 0 | 0 |
| 4 | 0 | 3 |
| 1 | 0 | 1 |
| 4 | 0 | 3 |
| 3 | 1 | 2 |
| 2 | 0 | 1 |
| 2 | 0 | 2 |
| 1 | 0 | 1 |
| 1 | 0 | 1 |
| 1 | 0 | 0 |
| 1 | 0 | 1 |
| 1 | 0 | 1 |
| 1 | 0 | 1 |
| 1 | 0 | 1 |
| 1 | 0 | 1 |
| 1 | 0 | 0 |
| 1 | 0 | 0 |
| 1 | 0 | 0 |
| 1 | 0 | 1 |
| 1 | 0 | 3 |
| 3 | 0 | 2 |
| 1 | 0 | 1 |
| 2 | 1 | 0 |
| 2 | 0 | 1 |
| 1 | 0 | 0 |
| 1 | 0 | 1 |
| 3 | 1 | 2 |
| 1 | 1 | 0 |

|   |   |   |
|---|---|---|
| 2 | 0 | 0 |
| 1 | 1 | 0 |
| 1 | 0 | 1 |
| 1 | 0 | 0 |
| 1 | 0 | 1 |
| 1 | 1 | 0 |
| 2 | 0 | 2 |
| 1 | 1 | 0 |
| 1 | 1 | 0 |
| 2 | 1 | 1 |
| 1 | 0 | 1 |
| 1 | 0 | 1 |
| 2 | 0 | 1 |
| 1 | 0 | 1 |
| 2 | 0 | 1 |
| 1 | 0 | 1 |
| 1 | 0 | 1 |
| 3 | 0 | 2 |
| 2 | 0 | 2 |
| 2 | 1 | 1 |
| 1 | 0 | 1 |
| 1 | 0 | 1 |
| 1 | 0 | 0 |
| 2 | 0 | 1 |
| 2 | 0 | 1 |
| 1 | 0 | 0 |
| 1 | 0 | 1 |
| 1 | 0 | 0 |
| 3 | 0 | 2 |
| 1 | 0 | 1 |
| 1 | 0 | 1 |
| 2 | 1 | 1 |
| 1 | 0 | 0 |
| 2 | 1 | 1 |
| 1 | 1 | 0 |
| 1 | 0 | 0 |
| 1 | 1 | 0 |
| 2 | 1 | 1 |
| 1 | 0 | 1 |
| 1 | 1 | 0 |
| 2 | 0 | 1 |
| 1 | 1 | 0 |
| 1 | 0 | 1 |
| 2 | 0 | 2 |
| 1 | 1 | 0 |
| 3 | 1 | 1 |
| 2 | 1 | 1 |
| 2 | 0 | 1 |
| 2 | 0 | 0 |
| 1 | 0 | 1 |
| 5 | 0 | 4 |
| 1 | 0 | 1 |
| 1 | 0 | 1 |
| 1 | 0 | 1 |







|   |   |   |
|---|---|---|
| 1 | 0 | 0 |
| 1 | 1 | 0 |
| 2 | 1 | 1 |
| 2 | 0 | 2 |
| 1 | 0 | 0 |
| 1 | 0 | 0 |
| 1 | 0 | 1 |
| 2 | 0 | 2 |
| 1 | 1 | 0 |
| 1 | 0 | 1 |
| 1 | 0 | 0 |
| 1 | 1 | 0 |
| 1 | 0 | 0 |
| 2 | 0 | 2 |
| 1 | 0 | 0 |
| 2 | 0 | 2 |
| 2 | 1 | 1 |
| 1 | 0 | 1 |
| 3 | 1 | 1 |
| 1 | 0 | 0 |
| 2 | 0 | 2 |
| 1 | 0 | 0 |
| 1 | 1 | 0 |
| 1 | 0 | 1 |
| 2 | 0 | 2 |
| 1 | 0 | 1 |
| 1 | 0 | 0 |
| 1 | 0 | 0 |
| 1 | 0 | 0 |
| 1 | 0 | 1 |
| 1 | 0 | 0 |
| 1 | 0 | 0 |
| 1 | 0 | 1 |
| 3 | 0 | 2 |
| 1 | 0 | 0 |
| 2 | 0 | 1 |
| 1 | 0 | 1 |
| 1 | 0 | 0 |
| 1 | 0 | 1 |
| 1 | 0 | 1 |
| 3 | 0 | 2 |
| 1 | 0 | 0 |
| 2 | 1 | 1 |
| 1 | 0 | 1 |
| 1 | 0 | 0 |
| 1 | 0 | 1 |
| 1 | 0 | 1 |
| 1 | 0 | 1 |
| 4 | 1 | 3 |
| 1 | 0 | 1 |
| 1 | 0 | 0 |
| 2 | 0 | 1 |

|   |   |   |
|---|---|---|
| 1 | 0 | 1 |
| 3 | 1 | 2 |
| 4 | 0 | 3 |
| 1 | 0 | 1 |
| 2 | 0 | 1 |
| 3 | 0 | 2 |
| 2 | 0 | 2 |
| 1 | 0 | 1 |
| 1 | 0 | 1 |
| 1 | 0 | 1 |
| 1 | 0 | 0 |
| 1 | 0 | 1 |
| 1 | 0 | 0 |
| 1 | 0 | 0 |
| 1 | 0 | 0 |
| 1 | 0 | 1 |
| 1 | 0 | 1 |
| 1 | 0 | 0 |
| 1 | 0 | 0 |
| 1 | 1 | 0 |
| 1 | 1 | 0 |
| 1 | 0 | 0 |
| 3 | 0 | 2 |
| 1 | 1 | 0 |
| 3 | 1 | 2 |
| 1 | 0 | 1 |
| 3 | 0 | 2 |
| 1 | 0 | 0 |
| 2 | 0 | 2 |
| 1 | 0 | 0 |
| 1 | 0 | 0 |
| 1 | 0 | 2 |
| 1 | 0 | 1 |
| 1 | 0 | 1 |
| 1 | 0 | 1 |
| 1 | 0 | 0 |
| 1 | 0 | 0 |
| 1 | 0 | 1 |
| 1 | 0 | 1 |
| 1 | 0 | 1 |
| 1 | 0 | 1 |
| 1 | 0 | 1 |
| 1 | 0 | 0 |
| 1 | 1 | 0 |
| 1 | 0 | 0 |
| 1 | 1 | 1 |
| 3 | 1 | 1 |
| 1 | 0 | 1 |
| 2 | 0 | 1 |
| 2 | 0 | 1 |
| 1 | 1 | 0 |
| 4 | 2 | 1 |
| 1 | 0 | 1 |

|   |   |   |
|---|---|---|
| 1 | 1 | 0 |
| 1 | 0 | 1 |
| 1 | 0 | 0 |
| 1 | 0 | 1 |
| 1 | 0 | 0 |
| 1 | 0 | 1 |
| 1 | 0 | 1 |
| 1 | 0 | 0 |
| 1 | 1 | 0 |
| 4 | 0 | 4 |
| 1 | 0 | 0 |
| 1 | 0 | 1 |
| 1 | 0 | 0 |
| 1 | 0 | 1 |
| 2 | 0 | 2 |
| 1 | 0 | 1 |
| 2 | 0 | 2 |
| 1 | 0 | 0 |
| 1 | 0 | 1 |
| 1 | 0 | 1 |
| 1 | 0 | 1 |
| 1 | 0 | 1 |
| 2 | 0 | 1 |
| 1 | 1 | 0 |
| 1 | 0 | 0 |
| 1 | 1 | 0 |
| 3 | 0 | 2 |
| 1 | 0 | 0 |
| 1 | 0 | 1 |
| 2 | 0 | 2 |
| 1 | 0 | 1 |
| 1 | 0 | 0 |
| 4 | 1 | 3 |
| 1 | 0 | 1 |
| 1 | 0 | 0 |
| 2 | 0 | 2 |
| 1 | 1 | 0 |
| 1 | 0 | 1 |
| 2 | 0 | 0 |
| 4 | 0 | 4 |
| 1 | 0 | 0 |
| 2 | 0 | 2 |
| 1 | 0 | 1 |
| 1 | 0 | 1 |
| 2 | 0 | 0 |
| 2 | 0 | 1 |
| 1 | 0 | 0 |
| 1 | 0 | 0 |
| 1 | 0 | 1 |
| 1 | 0 | 1 |
| 1 | 0 | 1 |
| 1 | 1 | 0 |
| 2 | 1 | 1 |
| 1 | 0 | 0 |
| 1 | 0 | 0 |

|   |   |   |
|---|---|---|
| 1 | 0 | 1 |
| 1 | 0 | 1 |
| 3 | 0 | 1 |
| 1 | 0 | 0 |
| 3 | 0 | 3 |
| 1 | 0 | 1 |
| 1 | 0 | 1 |
| 1 | 1 | 0 |
| 1 | 0 | 1 |
| 1 | 0 | 1 |
| 1 | 0 | 1 |
| 1 | 0 | 1 |
| 4 | 0 | 2 |
| 1 | 0 | 1 |
| 2 | 1 | 1 |
| 1 | 0 | 1 |
| 2 | 1 | 0 |
| 2 | 0 | 1 |
| 1 | 0 | 0 |
| 3 | 0 | 2 |
| 1 | 0 | 1 |
| 2 | 1 | 0 |
| 2 | 1 | 1 |
| 1 | 0 | 0 |
| 2 | 0 | 1 |
| 1 | 0 | 1 |
| 1 | 0 | 1 |
| 2 | 0 | 2 |
| 1 | 0 | 0 |
| 1 | 0 | 0 |
| 1 | 0 | 1 |
| 1 | 0 | 0 |
| 3 | 0 | 2 |
| 1 | 0 | 0 |
| 3 | 1 | 2 |
| 1 | 0 | 1 |
| 2 | 1 | 1 |
| 1 | 0 | 1 |
| 1 | 1 | 0 |
| 1 | 0 | 0 |
| 1 | 0 | 1 |
| 1 | 0 | 0 |
| 2 | 1 | 0 |
| 1 | 0 | 1 |
| 2 | 0 | 1 |
| 1 | 1 | 0 |
| 2 | 1 | 1 |
| 1 | 0 | 1 |
| 1 | 0 | 1 |
| 1 | 0 | 0 |
| 1 | 0 | 0 |
| 1 | 0 | 0 |
| 1 | 0 | 0 |
| 1 | 0 | 0 |
| 1 | 0 | 1 |
| 1 | 0 | 2 |

|   |   |   |
|---|---|---|
| 2 | 2 | 0 |
| 2 | 0 | 1 |
| 1 | 1 | 0 |
| 1 | 1 | 0 |
| 1 | 0 | 1 |
| 1 | 0 | 0 |
| 2 | 0 | 2 |
| 1 | 0 | 1 |
| 1 | 0 | 0 |
| 1 | 0 | 1 |
| 1 | 0 | 1 |
| 1 | 0 | 0 |
| 1 | 0 | 1 |
| 1 | 0 | 1 |
| 1 | 0 | 0 |
| 1 | 0 | 1 |
| 1 | 0 | 1 |
| 2 | 0 | 1 |
| 2 | 0 | 0 |
| 3 | 0 | 0 |
| 1 | 0 | 0 |
| 1 | 0 | 1 |
| 1 | 0 | 0 |
| 3 | 1 | 2 |
| 1 | 0 | 0 |
| 1 | 0 | 0 |
| 1 | 0 | 1 |
| 1 | 0 | 1 |
| 1 | 0 | 0 |
| 2 | 2 | 0 |
| 2 | 0 | 0 |
| 1 | 1 | 0 |
| 1 | 0 | 1 |
| 1 | 0 | 1 |
| 1 | 0 | 0 |
| 1 | 0 | 1 |
| 1 | 0 | 0 |
| 1 | 0 | 1 |
| 1 | 0 | 1 |
| 1 | 0 | 0 |
| 1 | 0 | 1 |
| 1 | 0 | 1 |
| 1 | 0 | 0 |
| 1 | 0 | 1 |
| 2 | 1 | 1 |
| 3 | 1 | 0 |
| 2 | 1 | 0 |
| 1 | 0 | 0 |
| 1 | 0 | 0 |
| 1 | 0 | 1 |
| 1 | 0 | 1 |
| 1 | 0 | 1 |
| 1 | 0 | 1 |
| 1 | 0 | 1 |
| 1 | 0 | 1 |
| 3 | 0 | 3 |
| 1 | 0 | 1 |
| 1 | 0 | 1 |
| 2 | 0 | 2 |

|   |   |   |
|---|---|---|
| 1 | 0 | 1 |
| 1 | 0 | 1 |
| 1 | 0 | 1 |
| 1 | 0 | 1 |
| 3 | 0 | 3 |
| 3 | 0 | 3 |
| 4 | 1 | 3 |
| 2 | 0 | 2 |
| 1 | 1 | 0 |
| 6 | 0 | 1 |
| 1 | 0 | 1 |
| 1 | 0 | 1 |
| 2 | 0 | 1 |
| 1 | 0 | 1 |
| 1 | 0 | 1 |
| 1 | 1 | 0 |
| 2 | 0 | 0 |
| 2 | 0 | 2 |
| 1 | 0 | 0 |
| 1 | 1 | 0 |
| 1 | 0 | 0 |
| 1 | 0 | 1 |
| 1 | 0 | 3 |
| 3 | 0 | 1 |
| 2 | 0 | 0 |
| 1 | 0 | 1 |
| 1 | 0 | 2 |
| 1 | 0 | 0 |
| 1 | 0 | 1 |
| 1 | 0 | 0 |
| 1 | 0 | 0 |
| 1 | 1 | 0 |
| 1 | 0 | 0 |
| 2 | 0 | 1 |
| 2 | 0 | 1 |
| 1 | 0 | 1 |
| 3 | 0 | 2 |
| 1 | 0 | 0 |
| 2 | 0 | 2 |
| 1 | 0 | 1 |
| 3 | 0 | 1 |
| 3 | 0 | 3 |
| 1 | 0 | 1 |
| 1 | 0 | 0 |
| 1 | 0 | 1 |
| 1 | 0 | 0 |
| 1 | 0 | 0 |
| 1 | 0 | 0 |
| 1 | 0 | 0 |
| 1 | 0 | 1 |
| 1 | 1 | 0 |
| 3 | 0 | 1 |
| 1 | 0 | 0 |
| 1 | 0 | 1 |
| 2 | 0 | 1 |



|   |   |   |
|---|---|---|
| 3 | 0 | 0 |
| 3 | 0 | 1 |
| 2 | 0 | 2 |
| 1 | 0 | 1 |
| 2 | 1 | 1 |
| 1 | 0 | 1 |
| 1 | 0 | 1 |
| 2 | 0 | 2 |
| 1 | 0 | 1 |
| 1 | 0 | 1 |
| 1 | 0 | 1 |
| 1 | 0 | 1 |
| 4 | 0 | 3 |
| 1 | 0 | 0 |
| 4 | 0 | 3 |
| 1 | 0 | 0 |
| 2 | 1 | 0 |
| 1 | 0 | 1 |
| 1 | 0 | 0 |
| 1 | 0 | 1 |
| 1 | 0 | 0 |
| 3 | 0 | 3 |
| 1 | 0 | 1 |
| 2 | 0 | 2 |
| 2 | 0 | 1 |
| 3 | 0 | 1 |
| 1 | 0 | 0 |
| 2 | 0 | 1 |
| 3 | 0 | 3 |
| 1 | 1 | 0 |
| 1 | 0 | 1 |
| 1 | 0 | 0 |
| 2 | 0 | 2 |
| 1 | 1 | 0 |
| 1 | 1 | 0 |
| 2 | 0 | 2 |
| 7 | 3 | 4 |
| 1 | 0 | 1 |
| 1 | 0 | 0 |
| 1 | 0 | 1 |
| 1 | 1 | 0 |
| 4 | 0 | 3 |
| 1 | 0 | 0 |
| 1 | 0 | 1 |
| 1 | 0 | 0 |
| 1 | 1 | 0 |
| 2 | 0 | 1 |
| 4 | 0 | 1 |
| 1 | 0 | 1 |
| 2 | 1 | 0 |
| 1 | 0 | 0 |
| 1 | 0 | 0 |
| 1 | 0 | 1 |
| 1 | 0 | 1 |

|   |   |   |
|---|---|---|
| 1 | 1 | 0 |
| 1 | 0 | 1 |
| 1 | 0 | 0 |
| 1 | 0 | 0 |
| 1 | 0 | 1 |
| 1 | 0 | 0 |
| 1 | 0 | 1 |
| 2 | 0 | 1 |
| 1 | 0 | 1 |
| 1 | 0 | 0 |
| 2 | 0 | 1 |
| 1 | 0 | 0 |
| 2 | 0 | 1 |
| 1 | 0 | 1 |
| 1 | 0 | 1 |
| 1 | 0 | 1 |
| 1 | 0 | 1 |
| 1 | 0 | 1 |
| 1 | 1 | 0 |
| 2 | 0 | 2 |
| 2 | 0 | 1 |
| 1 | 0 | 1 |
| 1 | 0 | 0 |
| 1 | 1 | 0 |
| 1 | 0 | 1 |
| 1 | 0 | 1 |
| 1 | 0 | 1 |
| 2 | 0 | 2 |
| 1 | 0 | 1 |
| 2 | 0 | 0 |
| 2 | 0 | 1 |
| 3 | 1 | 1 |
| 1 | 0 | 1 |
| 1 | 0 | 1 |
| 1 | 1 | 0 |
| 1 | 0 | 1 |
| 3 | 1 | 1 |
| 1 | 1 | 0 |
| 3 | 1 | 2 |
| 1 | 0 | 1 |
| 1 | 0 | 1 |
| 1 | 0 | 1 |
| 1 | 0 | 1 |
| 1 | 0 | 1 |
| 1 | 0 | 1 |
| 1 | 0 | 1 |
| 1 | 0 | 1 |
| 1 | 0 | 0 |
| 1 | 0 | 1 |
| 1 | 0 | 1 |
| 1 | 0 | 1 |
| 2 | 2 | 0 |
| 1 | 0 | 0 |
| 1 | 0 | 1 |
| 3 | 0 | 3 |
| 2 | 1 | 1 |

|   |   |   |
|---|---|---|
| 2 | 0 | 1 |
| 2 | 0 | 2 |
| 1 | 0 | 1 |
| 1 | 1 | 0 |
| 3 | 0 | 3 |
| 1 | 0 | 1 |
| 1 | 1 | 0 |
| 1 | 0 | 1 |
| 1 | 0 | 0 |
| 3 | 0 | 2 |
| 2 | 0 | 0 |
| 1 | 0 | 0 |
| 2 | 0 | 1 |
| 4 | 0 | 3 |
| 2 | 0 | 2 |
| 1 | 0 | 1 |
| 2 | 0 | 2 |
| 6 | 1 | 2 |
| 3 | 1 | 2 |
| 1 | 0 | 0 |
| 1 | 0 | 1 |
| 2 | 1 | 1 |
| 1 | 0 | 1 |
| 1 | 0 | 1 |
| 2 | 1 | 1 |
| 1 | 0 | 1 |
| 1 | 0 | 1 |
| 1 | 1 | 0 |
| 2 | 0 | 2 |
| 1 | 0 | 0 |
| 1 | 0 | 1 |
| 1 | 0 | 1 |
| 1 | 0 | 1 |
| 1 | 0 | 1 |
| 1 | 1 | 0 |
| 1 | 0 | 1 |
| 2 | 1 | 1 |
| 1 | 0 | 1 |
| 1 | 0 | 0 |
| 2 | 0 | 1 |
| 2 | 0 | 2 |
| 1 | 0 | 1 |
| 2 | 0 | 0 |
| 1 | 0 | 1 |
| 3 | 1 | 2 |
| 2 | 0 | 1 |
| 1 | 0 | 0 |
| 1 | 0 | 1 |
| 7 | 0 | 7 |
| 3 | 1 | 0 |
| 2 | 0 | 1 |
| 1 | 0 | 0 |
| 1 | 0 | 1 |
| 1 | 0 | 1 |
| 1 | 0 | 0 |



|   |   |   |
|---|---|---|
| 1 | 0 | 0 |
| 1 | 0 | 1 |
| 1 | 0 | 1 |
| 1 | 0 | 1 |
| 1 | 0 | 0 |
| 1 | 0 | 1 |
| 1 | 0 | 0 |
| 1 | 0 | 1 |
| 1 | 0 | 0 |
| 1 | 0 | 0 |
| 1 | 0 | 0 |
| 1 | 0 | 1 |
| 1 | 0 | 0 |
| 2 | 1 | 1 |
| 2 | 0 | 2 |
| 1 | 0 | 0 |
| 1 | 0 | 1 |
| 2 | 0 | 2 |
| 2 | 0 | 2 |
| 1 | 0 | 0 |
| 1 | 0 | 1 |
| 1 | 0 | 1 |
| 1 | 0 | 1 |
| 3 | 0 | 2 |
| 1 | 0 | 0 |
| 2 | 0 | 1 |
| 1 | 0 | 1 |
| 1 | 0 | 0 |
| 1 | 0 | 1 |
| 2 | 0 | 0 |
| 2 | 0 | 2 |
| 2 | 0 | 2 |
| 1 | 0 | 0 |
| 1 | 0 | 0 |
| 1 | 1 | 0 |
| 1 | 0 | 1 |
| 2 | 0 | 2 |
| 2 | 0 | 0 |
| 2 | 0 | 1 |
| 1 | 0 | 1 |
| 1 | 0 | 1 |
| 1 | 0 | 1 |
| 1 | 0 | 1 |
| 2 | 0 | 0 |
| 1 | 0 | 0 |
| 3 | 0 | 2 |
| 1 | 0 | 1 |
| 4 | 0 | 3 |
| 2 | 0 | 2 |
| 2 | 0 | 0 |
| 2 | 1 | 1 |
| 2 | 0 | 2 |
| 1 | 0 | 1 |

|   |   |   |
|---|---|---|
| 1 | 0 | 1 |
| 1 | 0 | 1 |
| 1 | 0 | 1 |
| 1 | 1 | 0 |
| 1 | 0 | 1 |
| 1 | 0 | 1 |
| 1 | 0 | 0 |
| 1 | 0 | 0 |
| 1 | 0 | 0 |
| 1 | 0 | 0 |
| 1 | 1 | 0 |
| 1 | 0 | 1 |
| 1 | 0 | 1 |
| 1 | 0 | 1 |
| 1 | 0 | 1 |
| 1 | 1 | 0 |
| 2 | 0 | 1 |
| 1 | 0 | 1 |
| 1 | 0 | 0 |
| 2 | 0 | 1 |
| 1 | 0 | 1 |
| 2 | 0 | 1 |
| 2 | 0 | 1 |
| 2 | 1 | 1 |
| 2 | 0 | 0 |
| 1 | 0 | 1 |
| 3 | 1 | 2 |
| 1 | 0 | 1 |
| 1 | 0 | 1 |
| 1 | 0 | 1 |
| 1 | 0 | 0 |
| 1 | 0 | 1 |
| 1 | 0 | 1 |
| 1 | 0 | 1 |
| 1 | 0 | 1 |
| 1 | 0 | 0 |
| 1 | 0 | 1 |
| 1 | 0 | 1 |
| 2 | 0 | 1 |
| 2 | 0 | 2 |
| 2 | 1 | 0 |
| 2 | 1 | 1 |
| 1 | 0 | 1 |
| 1 | 0 | 1 |
| 1 | 0 | 1 |
| 1 | 0 | 1 |
| 2 | 0 | 0 |
| 1 | 1 | 0 |
| 2 | 0 | 2 |
| 2 | 0 | 2 |
| 1 | 0 | 1 |
| 1 | 1 | 0 |
| 1 | 0 | 1 |
| 1 | 0 | 1 |
| 3 | 2 | 0 |
| 1 | 0 | 0 |
| 3 | 1 | 1 |
| 3 | 0 | 3 |

3\*

|   |   |   |
|---|---|---|
| 1 | 0 | 0 |
| 1 | 0 | 1 |
| 2 | 0 | 2 |
| 1 | 0 | 0 |
| 3 | 1 | 1 |
| 1 | 0 | 1 |
| 3 | 0 | 1 |
| 1 | 0 | 0 |
|   | 0 | 2 |
| 1 | 0 | 0 |
| 2 | 0 | 1 |
| 4 | 0 | 3 |
| 1 | 0 | 1 |
| 2 | 0 | 2 |
| 2 | 0 | 1 |
| 4 | 1 | 3 |
| 1 | 0 | 0 |
| 1 | 1 | 0 |
| 2 | 0 | 2 |
| 1 | 0 | 1 |
| 2 | 1 | 1 |
| 1 | 0 | 0 |
| 2 | 0 | 2 |
| 1 | 0 | 1 |
| 1 | 0 | 1 |
| 1 | 0 | 1 |
| 1 | 0 | 1 |
| 1 | 0 | 0 |
| 2 | 1 | 1 |
| 1 | 1 | 0 |
| 2 | 0 | 1 |
| 1 | 0 | 0 |
| 3 | 0 | 2 |
| 1 | 0 | 1 |
| 1 | 1 | 0 |
| 2 | 0 | 2 |
| 1 | 0 | 1 |
| 1 | 0 | 0 |
| 1 | 0 | 1 |
| 1 | 0 | 0 |
| 1 | 0 | 0 |
| 2 | 0 | 1 |
| 1 | 0 | 1 |
| 1 | 0 | 0 |
| 1 | 0 | 1 |
| 1 | 0 | 0 |
| 1 | 0 | 1 |
| 1 | 0 | 0 |
| 1 | 0 | 1 |
| 1 | 0 | 0 |
| 1 | 0 | 1 |
| 1 | 0 | 0 |
| 1 | 0 | 1 |
| 1 | 0 | 0 |
| 1 | 0 | 1 |
| 4 | 1 | 2 |
| 1 | 0 | 1 |
| 2 | 1 | 1 |

|    |   |    |
|----|---|----|
| 1  | 0 | 1  |
| 2  | 0 | 0  |
| 1  | 0 | 0  |
| 2  | 1 | 0  |
| 3  | 1 | 2  |
| 2  | 1 | 1  |
| 1  | 0 | 0  |
| 1  | 0 | 1  |
| 1  | 1 | 0  |
| 1  | 0 | 1  |
| 1  | 0 | 1  |
| 1  | 0 | 0  |
| 1  | 1 | 0  |
| 1  | 0 | 1  |
| 19 | 0 | 19 |
| 1  | 0 | 1  |
| 1  | 0 | 1  |
| 1  | 0 | 1  |
| 1  | 0 | 0  |
| 6  | 0 | 5  |
| 1  | 0 | 0  |
| 1  | 0 | 0  |
| 2  | 0 | 0  |
| 1  | 0 | 0  |
| 1  | 0 | 1  |
| 1  | 0 | 1  |
| 1  | 0 | 1  |
| 1  | 0 | 0  |
| 1  | 0 | 1  |
| 1  | 0 | 0  |
| 2  | 1 | 1  |
| 1  | 0 | 1  |
| 1  | 0 | 1  |
| 2  | 0 | 2  |
| 1  | 0 | 0  |
| 1  | 0 | 1  |
| 1  | 0 | 1  |
| 1  | 0 | 1  |
| 2  | 0 | 1  |
| 1  | 0 | 1  |
| 2  | 1 | 1  |
| 1  | 0 | 0  |
| 1  | 0 | 1  |
| 1  | 0 | 1  |
| 1  | 0 | 1  |
| 2  | 0 | 1  |
| 4  | 1 | 2  |
| 1  | 0 | 1  |
| 1  | 0 | 1  |
| 3  | 0 | 3  |
| 1  | 0 | 1  |
| 2  | 0 | 2  |
| 1  | 0 | 0  |
| 1  | 0 | 1  |



|   |   |   |
|---|---|---|
| 1 | 0 | 1 |
| 1 | 0 | 1 |
| 1 | 0 | 1 |
| 1 | 0 | 0 |
| 2 | 0 | 2 |
| 2 | 0 | 2 |
| 1 | 0 | 0 |
| 1 | 0 | 1 |
| 1 | 1 | 0 |
| 1 | 0 | 1 |
| 1 | 1 | 0 |
| 1 | 0 | 1 |
| 1 | 0 | 1 |
| 1 | 0 | 1 |
| 1 | 0 | 1 |
| 3 | 1 | 2 |
| 1 | 0 | 1 |
| 5 | 1 | 2 |
| 2 | 0 | 2 |
| 1 | 1 | 0 |
| 1 | 0 | 1 |
| 2 | 2 | 0 |
| 1 | 0 | 1 |
| 1 | 0 | 0 |
| 2 | 0 | 1 |
| 1 | 0 | 0 |
| 1 | 0 | 1 |
| 2 | 0 | 1 |
| 3 | 0 | 1 |
| 1 | 0 | 1 |
| 1 | 0 | 1 |
| 3 | 1 | 0 |
| 1 | 0 | 1 |
| 1 | 0 | 1 |
| 1 | 0 | 1 |
| 3 | 0 | 0 |
| 1 | 0 | 1 |
| 2 | 0 | 2 |
| 1 | 0 | 1 |
| 1 | 0 | 1 |
| 1 | 0 | 0 |
| 1 | 0 | 1 |
| 2 | 0 | 1 |
| 2 | 0 | 1 |
| 3 | 0 | 2 |
| 1 | 0 | 1 |
| 1 | 0 | 0 |
| 2 | 1 | 1 |
| 2 | 0 | 2 |
| 3 | 1 | 2 |
| 1 | 0 | 1 |
| 1 | 0 | 0 |
| 3 | 2 | 1 |
| 1 | 0 | 0 |
| 2 | 0 | 2 |





|   |   |   |
|---|---|---|
| 4 | 1 | 0 |
| 1 | 0 | 0 |
| 2 | 1 | 1 |
| 1 | 1 | 0 |
| 1 | 0 | 1 |
| 2 | 1 | 0 |
| 1 | 0 | 1 |
| 1 | 0 | 1 |
| 2 | 0 | 1 |
| 2 | 0 | 1 |
| 4 | 1 | 3 |
| 1 | 0 | 1 |
| 2 | 0 | 2 |
| 1 | 0 | 1 |
| 1 | 0 | 0 |
| 1 | 0 | 1 |
| 1 | 0 | 1 |
| 1 | 0 | 1 |
| 1 | 0 | 1 |
| 1 | 0 | 1 |
| 1 | 0 | 0 |
| 1 | 0 | 0 |
| 1 | 0 | 0 |
| 1 | 0 | 0 |
| 1 | 0 | 0 |
| 1 | 0 | 1 |
| 2 | 0 | 1 |
| 1 | 0 | 0 |
| 2 | 1 | 1 |
| 1 | 0 | 1 |
| 1 | 0 | 0 |
| 1 | 1 | 0 |
| 3 | 2 | 0 |
| 1 | 1 | 0 |
| 2 | 0 | 2 |
| 1 | 1 | 0 |
| 2 | 0 | 2 |
| 1 | 0 | 1 |
| 1 | 1 | 0 |
| 1 | 1 | 0 |
| 1 | 0 | 1 |
| 1 | 0 | 1 |
| 1 | 0 | 1 |
| 1 | 0 | 1 |
| 1 | 0 | 1 |
| 1 | 0 | 1 |
| 1 | 0 | 1 |
| 1 | 0 | 1 |
| 3 | 0 | 2 |
| 1 | 0 | 1 |
| 2 | 0 | 1 |
| 2 | 0 | 1 |
| 1 | 0 | 1 |
| 1 | 0 | 1 |
| 2 | 0 | 0 |
| 2 | 0 | 2 |
| 1 | 0 | 0 |
| 1 | 0 | 0 |



|   |   |   |
|---|---|---|
| 1 | 0 | 0 |
| 1 | 0 | 1 |
| 1 | 0 | 1 |
| 1 | 0 | 1 |
| 1 | 0 | 0 |
| 1 | 0 | 0 |
| 1 | 0 | 1 |
| 1 | 0 | 0 |
| 1 | 0 | 1 |
| 1 | 0 | 1 |
| 2 | 0 | 2 |
| 1 | 0 | 1 |
| 2 | 0 | 2 |
| 1 | 0 | 1 |
| 2 | 1 | 1 |
| 1 | 1 | 0 |
| 2 | 0 | 1 |
| 1 | 0 | 1 |
| 2 | 0 | 0 |
| 1 | 0 | 1 |
| 1 | 0 | 0 |
| 2 | 0 | 2 |
| 1 | 0 | 1 |
| 1 | 0 | 1 |
| 1 | 0 | 0 |
| 1 | 0 | 1 |
| 2 | 0 | 1 |
| 1 | 0 | 1 |
| 2 | 0 | 1 |
| 1 | 0 | 0 |
| 1 | 1 | 0 |
| 2 | 1 | 0 |
| 2 | 1 | 0 |
| 1 | 1 | 0 |
| 1 | 0 | 1 |
| 1 | 1 | 0 |
| 1 | 0 | 0 |
| 2 | 2 | 0 |
| 2 | 1 | 1 |
| 1 | 1 | 0 |
| 1 | 0 | 0 |
| 1 | 0 | 0 |
| 2 | 1 | 0 |
| 2 | 0 | 1 |
| 3 | 1 | 2 |
| 1 | 0 | 1 |
| 1 | 0 | 0 |
| 2 | 0 | 2 |
| 1 | 0 | 0 |
| 2 | 0 | 2 |
| 3 | 0 | 1 |
| 1 | 0 | 0 |

|   |   |   |
|---|---|---|
| 1 | 0 | 1 |
| 1 | 0 | 1 |
| 1 | 1 | 0 |
| 2 | 0 | 2 |
| 2 | 0 | 0 |
| 1 | 0 | 1 |
| 2 | 1 | 1 |
| 2 | 0 | 2 |
| 1 | 0 | 0 |
| 1 | 0 | 1 |
| 1 | 1 | 0 |
| 1 | 0 | 0 |
| 1 | 0 | 0 |
| 1 | 0 | 1 |
| 2 | 1 | 1 |
| 2 | 0 | 2 |
| 2 | 0 | 2 |
| 2 | 0 | 2 |
| 2 | 1 | 0 |
| 1 | 1 | 0 |
| 2 | 0 | 2 |
| 2 | 0 | 2 |
| 1 | 0 | 0 |
| 2 | 0 | 2 |
| 2 | 0 | 2 |
| 2 | 0 | 2 |
| 2 | 0 | 2 |
| 3 | 0 | 3 |
| 2 | 0 | 2 |
| 2 | 0 | 2 |
| 1 | 0 | 1 |
| 2 | 0 | 2 |
| 1 | 0 | 0 |
| 2 | 0 | 2 |
| 1 | 0 | 1 |
| 2 | 0 | 2 |
| 2 | 0 | 2 |
| 2 | 0 | 2 |
| 2 | 0 | 2 |
| 1 | 0 | 0 |
| 1 | 0 | 1 |
| 1 | 0 | 1 |
| 2 | 0 | 2 |
| 2 | 0 | 2 |
| 2 | 0 | 2 |
| 1 | 0 | 0 |
| 1 | 0 | 0 |
| 3 | 0 | 1 |
| 3 | 1 | 1 |
| 1 | 0 | 1 |
| 1 | 0 | 1 |
| 2 | 0 | 2 |
| 1 | 0 | 0 |
| 4 | 0 | 3 |
| 2 | 0 | 2 |
| 1 | 0 | 1 |

|   |   |   |
|---|---|---|
| 1 | 0 | 1 |
| 1 | 0 | 1 |
| 1 | 1 | 0 |
| 3 | 2 | 1 |
| 2 | 0 | 1 |
| 1 | 1 | 0 |
| 1 | 0 | 1 |
| 1 | 0 | 1 |
| 1 | 0 | 0 |
| 1 | 0 | 1 |
| 1 | 0 | 1 |
| 1 | 0 | 1 |
| 1 | 0 | 1 |
| 2 | 0 | 2 |
| 1 | 0 | 0 |
| 1 | 0 | 1 |
| 1 | 0 | 1 |
| 3 | 1 | 2 |
| 1 | 0 | 0 |
| 4 | 0 | 4 |
| 1 | 0 | 1 |
| 1 | 1 | 0 |
| 1 | 0 | 1 |
| 2 | 0 | 2 |
| 2 | 0 | 1 |
| 1 | 0 | 1 |
| 1 | 0 | 1 |
| 1 | 0 | 0 |
| 1 | 0 | 1 |
| 2 | 0 | 1 |
| 2 | 1 | 1 |
| 2 | 0 | 2 |
| 1 | 0 | 1 |
| 3 | 1 | 2 |
| 1 | 1 | 0 |
| 3 | 1 | 2 |
| 1 | 0 | 1 |
| 2 | 0 | 2 |
| 1 | 0 | 0 |
| 1 | 0 | 0 |
| 1 | 0 | 1 |
| 1 | 0 | 1 |
| 1 | 0 | 1 |
| 1 | 0 | 1 |
| 1 | 1 | 0 |
| 1 | 0 | 0 |
| 1 | 0 | 1 |
| 1 | 0 | 1 |
| 1 | 0 | 1 |
| 2 | 0 | 2 |
| 2 | 1 | 1 |
| 1 | 0 | 1 |
| 1 | 0 | 0 |
| 1 | 0 | 1 |
| 2 | 0 | 1 |
| 1 | 1 | 0 |
| 1 | 1 | 0 |





2\*

|   |   |   |
|---|---|---|
| 1 | 0 | 1 |
| 1 | 0 | 0 |
| 1 | 0 | 0 |
| 1 | 0 | 0 |
| 1 | 0 | 0 |
| 3 | 1 | 1 |
| 1 | 0 | 1 |
| 2 | 0 | 2 |
| 3 | 0 | 3 |
| 5 | 0 | 3 |
| 1 | 0 | 1 |
| 3 | 0 | 1 |
| 1 | 0 | 0 |
|   | 0 | 1 |
| 1 | 0 | 1 |
| 2 | 0 | 2 |
| 1 | 0 | 1 |
| 1 | 0 | 1 |
| 2 | 0 | 1 |
| 1 | 0 | 1 |
| 6 | 0 | 6 |
| 3 | 2 | 0 |
| 2 | 0 | 1 |
| 3 | 0 | 3 |
| 1 | 0 | 0 |
| 1 | 0 | 1 |
| 1 | 0 | 0 |
| 1 | 0 | 0 |
| 1 | 0 | 1 |
| 1 | 0 | 1 |
| 1 | 0 | 1 |
| 1 | 0 | 1 |
| 2 | 1 | 1 |
| 3 | 1 | 2 |
| 4 | 0 | 3 |
| 3 | 0 | 3 |
| 1 | 0 | 1 |
| 2 | 0 | 1 |
| 1 | 0 | 0 |
| 1 | 1 | 0 |
| 2 | 1 | 0 |
| 1 | 0 | 1 |
| 1 | 0 | 1 |
| 2 | 0 | 2 |
| 1 | 0 | 1 |
| 1 | 0 | 1 |
| 1 | 0 | 1 |
| 2 | 0 | 1 |
| 1 | 0 | 1 |
| 1 | 0 | 0 |
| 1 | 0 | 0 |
| 2 | 0 | 1 |
| 2 | 1 | 1 |

|   |   |   |
|---|---|---|
| 2 | 0 | 2 |
| 1 | 0 | 1 |
| 1 | 1 | 0 |
| 2 | 0 | 1 |
| 2 | 0 | 1 |
| 1 | 0 | 0 |
| 1 | 0 | 1 |
| 4 | 1 | 2 |
| 2 | 0 | 0 |
| 1 | 0 | 1 |
| 1 | 0 | 1 |
| 2 | 0 | 2 |
| 1 | 0 | 1 |
| 1 | 0 | 1 |
| 1 | 1 | 0 |
| 1 | 0 | 0 |
| 3 | 1 | 2 |
| 2 | 1 | 0 |
| 3 | 0 | 2 |
| 4 | 2 | 0 |
| 1 | 1 | 0 |
| 1 | 0 | 1 |
| 2 | 0 | 1 |
| 2 | 0 | 1 |
| 1 | 1 | 0 |
| 1 | 1 | 0 |
| 1 | 1 | 0 |
| 1 | 0 | 1 |
| 2 | 0 | 1 |
| 1 | 1 | 0 |
| 1 | 1 | 0 |
| 1 | 1 | 0 |
| 1 | 1 | 0 |
| 2 | 0 | 1 |
| 1 | 1 | 0 |
| 1 | 1 | 0 |
| 2 | 0 | 1 |
| 1 | 1 | 0 |
| 1 | 1 | 0 |
| 1 | 1 | 0 |
| 1 | 1 | 0 |
| 1 | 1 | 0 |
| 1 | 1 | 0 |
| 1 | 1 | 0 |
| 1 | 1 | 0 |
| 2 | 0 | 1 |
| 1 | 1 | 0 |
| 1 | 1 | 0 |
| 1 | 1 | 0 |
| 2 | 0 | 1 |
| 1 | 1 | 0 |
| 1 | 1 | 0 |
| 2 | 0 | 1 |
| 1 | 1 | 0 |
| 2 | 1 | 1 |

|   |   |   |
|---|---|---|
| 2 | 1 | 1 |
| 1 | 0 | 0 |
| 1 | 0 | 0 |
| 1 | 1 | 0 |
| 1 | 1 | 0 |
| 2 | 1 | 0 |
| 2 | 0 | 1 |
| 1 | 1 | 0 |
| 1 | 1 | 0 |
| 1 | 1 | 0 |
| 2 | 1 | 0 |
| 1 | 0 | 1 |
| 1 | 0 | 0 |
| 1 | 0 | 1 |
| 1 | 1 | 0 |
| 1 | 0 | 1 |
| 3 | 0 | 3 |
| 1 | 0 | 1 |
| 1 | 1 | 0 |
| 1 | 0 | 1 |
| 3 | 0 | 2 |
| 1 | 0 | 1 |
| 1 | 0 | 1 |
| 1 | 0 | 1 |
| 1 | 0 | 1 |
| 2 | 0 | 1 |
| 1 | 0 | 0 |
| 1 | 0 | 1 |
| 1 | 0 | 1 |
| 1 | 0 | 1 |
| 2 | 0 | 1 |
| 1 | 0 | 1 |
| 1 | 0 | 1 |
| 1 | 0 | 1 |
| 1 | 0 | 1 |
| 1 | 1 | 0 |
| 1 | 1 | 0 |
| 2 | 0 | 2 |
| 2 | 0 | 1 |
| 3 | 0 | 2 |
| 3 | 0 | 2 |
| 1 | 1 | 0 |
| 2 | 0 | 2 |
| 2 | 0 | 1 |
| 1 | 1 | 0 |
| 1 | 0 | 1 |
| 1 | 0 | 1 |
| 4 | 1 | 2 |
| 1 | 0 | 1 |
| 2 | 1 | 1 |
| 1 | 0 | 1 |



|   |   |   |
|---|---|---|
| 1 | 0 | 0 |
| 3 | 0 | 1 |
| 1 | 0 | 1 |
| 1 | 0 | 1 |
| 1 | 0 | 1 |
| 1 | 0 | 1 |
| 1 | 1 | 1 |
| 1 | 0 | 0 |
| 1 | 0 | 1 |
| 1 | 0 | 1 |
| 1 | 0 | 1 |
| 3 | 0 | 3 |
| 1 | 0 | 1 |
| 1 | 0 | 1 |
| 3 | 0 | 2 |
| 1 | 1 | 0 |
| 1 | 0 | 1 |
| 1 | 0 | 0 |
| 1 | 0 | 0 |
| 1 | 1 | 0 |
| 1 | 1 | 0 |
| 2 | 0 | 1 |
| 1 | 0 | 1 |
| 2 | 0 | 1 |
| 3 | 1 | 1 |
| 1 | 0 | 1 |
| 3 | 0 | 1 |
| 3 | 1 | 0 |
| 3 | 1 | 2 |
| 1 | 0 | 1 |
| 1 | 0 | 1 |
| 1 | 1 | 0 |
| 1 | 0 | 1 |
| 1 | 0 | 1 |
| 1 | 1 | 0 |
| 1 | 0 | 0 |
| 1 | 0 | 1 |
| 2 | 0 | 2 |
| 2 | 1 | 1 |
| 1 | 0 | 1 |
| 1 | 0 | 0 |
| 1 | 0 | 0 |
| 2 | 1 | 0 |
| 1 | 0 | 1 |
| 2 | 0 | 2 |
| 1 | 0 | 1 |
| 1 | 1 | 0 |
| 1 | 0 | 0 |
| 1 | 1 | 0 |
| 1 | 0 | 1 |
| 2 | 0 | 1 |
| 2 | 0 | 1 |
| 1 | 0 | 1 |
| 1 | 0 | 1 |

|   |   |   |
|---|---|---|
| 1 | 0 | 1 |
| 1 | 0 | 1 |
| 2 | 0 | 2 |
| 2 | 1 | 0 |
| 1 | 0 | 0 |
| 1 | 0 | 1 |
| 1 | 0 | 0 |
| 3 | 0 | 2 |
| 2 | 0 | 1 |
| 1 | 1 | 0 |
| 2 | 0 | 1 |
| 2 | 0 | 1 |
| 1 | 0 | 0 |
| 1 | 0 | 1 |
| 2 | 0 | 2 |
| 2 | 2 | 0 |
| 2 | 0 | 2 |
| 1 | 0 | 1 |
| 1 | 0 | 1 |
| 2 | 0 | 1 |
| 1 | 0 | 1 |
| 1 | 0 | 0 |
| 1 | 0 | 0 |
| 3 | 1 | 2 |
| 1 | 1 | 0 |
| 1 | 0 | 1 |
| 1 | 0 | 0 |
| 1 | 0 | 0 |
| 1 | 0 | 1 |
| 1 | 1 | 0 |
| 1 | 0 | 1 |
| 1 | 0 | 1 |
| 1 | 0 | 1 |
| 1 | 0 | 1 |
| 1 | 0 | 0 |
| 1 | 0 | 1 |
| 1 | 0 | 1 |
| 1 | 0 | 1 |
| 1 | 0 | 0 |
| 3 | 0 | 1 |
| 1 | 1 | 0 |
| 1 | 1 | 0 |
| 1 | 1 | 0 |
| 2 | 1 | 0 |
| 1 | 1 | 0 |
| 1 | 0 | 1 |
| 1 | 0 | 1 |
| 2 | 0 | 1 |
| 1 | 0 | 0 |
| 2 | 0 | 1 |
| 1 | 0 | 1 |
| 2 | 0 | 1 |
| 1 | 0 | 0 |
| 1 | 1 | 0 |
| 1 | 0 | 1 |















|   |   |   |
|---|---|---|
| 1 | 0 | 1 |
| 1 | 0 | 1 |
| 2 | 0 | 1 |
| 1 | 0 | 1 |
| 1 | 0 | 1 |
| 1 | 0 | 0 |
| 1 | 0 | 1 |
| 1 | 0 | 1 |
| 2 | 1 | 1 |
| 1 | 0 | 1 |
| 1 | 0 | 1 |
| 1 | 0 | 1 |
| 1 | 0 | 1 |
| 1 | 0 | 1 |
| 1 | 0 | 0 |
| 1 | 0 | 1 |
| 2 | 0 | 1 |
| 1 | 0 | 1 |
| 2 | 1 | 0 |
| 1 | 0 | 1 |
| 1 | 0 | 1 |
| 1 | 0 | 0 |
| 1 | 1 | 0 |
| 1 | 0 | 1 |
| 1 | 0 | 1 |
| 1 | 0 | 1 |
| 2 | 0 | 2 |
| 1 | 0 | 0 |
| 1 | 0 | 1 |
| 1 | 0 | 1 |
| 1 | 1 | 0 |
| 2 | 1 | 1 |
| 1 | 0 | 1 |
| 1 | 0 | 1 |
| 1 | 0 | 1 |
| 1 | 0 | 0 |
| 1 | 0 | 1 |
| 5 | 2 | 1 |
| 2 | 0 | 1 |
| 1 | 0 | 1 |
| 3 | 1 | 2 |
| 1 | 0 | 0 |
| 1 | 0 | 1 |
| 1 | 0 | 0 |
| 2 | 0 | 1 |
| 1 | 0 | 1 |
| 1 | 0 | 1 |
| 1 | 0 | 1 |
| 1 | 0 | 1 |
| 1 | 0 | 1 |
| 1 | 0 | 1 |
| 1 | 0 | 0 |
| 1 | 0 | 2 |
| 3 | 0 | 1 |
| 2 | 0 | 1 |
| 2 | 1 | 0 |
| 1 | 0 | 1 |
| 1 | 0 | 1 |



|   |   |   |
|---|---|---|
| 1 | 0 | 1 |
| 1 | 0 | 1 |
| 3 | 3 | 0 |
| 1 | 0 | 1 |
| 1 | 1 | 0 |
| 4 | 1 | 2 |
| 1 | 0 | 0 |
| 9 | 3 | 2 |
| 1 | 0 | 1 |
| 3 | 1 | 1 |
| 1 | 0 | 0 |
| 1 | 0 | 0 |
| 1 | 0 | 1 |
| 1 | 0 | 1 |
| 1 | 0 | 1 |
| 1 | 0 | 0 |
| 1 | 0 | 1 |
| 2 | 0 | 0 |
| 1 | 0 | 1 |
| 2 | 0 | 2 |
| 2 | 0 | 1 |
| 1 | 0 | 1 |
| 1 | 0 | 1 |
| 1 | 1 | 0 |
| 1 | 0 | 0 |
| 1 | 0 | 1 |
| 1 | 0 | 0 |
| 2 | 0 | 1 |
| 1 | 1 | 0 |
| 2 | 0 | 2 |
| 1 | 0 | 1 |
| 1 | 0 | 1 |
| 1 | 0 | 0 |
| 1 | 1 | 0 |
| 2 | 0 | 2 |
| 1 | 0 | 1 |
| 1 | 0 | 1 |
| 1 | 0 | 1 |
| 1 | 0 | 1 |
| 1 | 0 | 1 |
| 1 | 0 | 1 |
| 1 | 0 | 1 |
| 1 | 0 | 1 |
| 1 | 0 | 1 |
| 5 | 0 | 3 |
| 1 | 0 | 1 |
| 2 | 1 | 1 |
| 1 | 0 | 0 |
| 1 | 0 | 1 |
| 1 | 0 | 1 |
| 2 | 0 | 1 |
| 1 | 0 | 1 |







2\*

|   |   |   |
|---|---|---|
| 2 | 0 | 1 |
| 1 | 0 | 1 |
| 1 | 1 | 0 |
| 1 | 1 | 0 |
| 1 | 0 | 1 |
| 1 | 0 | 0 |
| 1 | 0 | 1 |
| 1 | 1 | 0 |
| 1 | 0 | 1 |
| 1 | 0 | 0 |
| 1 | 1 | 0 |
| 1 | 0 | 1 |
| 7 | 4 | 2 |
| 1 | 0 | 0 |
| 1 | 1 | 0 |
|   | 0 | 0 |
| 1 | 0 | 1 |
| 1 | 0 | 0 |
| 2 | 0 | 2 |
| 2 | 0 | 1 |
| 2 | 0 | 2 |
| 1 | 0 | 1 |
| 1 | 0 | 1 |
| 1 | 0 | 1 |
| 1 | 0 | 1 |
| 3 | 0 | 2 |
| 1 | 0 | 1 |
| 1 | 1 | 0 |
| 1 | 0 | 0 |
| 1 | 0 | 0 |
| 3 | 0 | 1 |
| 1 | 0 | 1 |
| 1 | 0 | 1 |
| 1 | 0 | 0 |
| 2 | 0 | 1 |
| 2 | 1 | 1 |
| 1 | 1 | 0 |
| 1 | 0 | 1 |
| 1 | 0 | 1 |
| 1 | 0 | 0 |
| 1 | 1 | 0 |
| 1 | 0 | 0 |
| 1 | 0 | 0 |
| 1 | 0 | 1 |
| 1 | 0 | 1 |
| 1 | 0 | 1 |
| 1 | 1 | 0 |
| 1 | 0 | 1 |
| 1 | 1 | 0 |
| 1 | 0 | 0 |
| 1 | 1 | 0 |
| 1 | 0 | 0 |
| 2 | 0 | 2 |
| 1 | 0 | 1 |





|   |   |   |
|---|---|---|
| 1 | 1 | 0 |
| 1 | 0 | 1 |
| 1 | 0 | 1 |
| 1 | 1 | 0 |
| 1 | 0 | 0 |
| 2 | 0 | 1 |
| 2 | 0 | 1 |
| 3 | 0 | 2 |
| 1 | 0 | 0 |
| 1 | 0 | 0 |
| 2 | 0 | 0 |
| 1 | 0 | 1 |
| 1 | 0 | 0 |
| 1 | 0 | 1 |
| 1 | 0 | 0 |
| 2 | 0 | 2 |
| 1 | 0 | 0 |
| 1 | 0 | 1 |
| 1 | 0 | 0 |
| 1 | 1 | 0 |
| 1 | 0 | 1 |
| 1 | 0 | 1 |
| 1 | 0 | 2 |
| 2 | 0 | 2 |
| 2 | 0 | 1 |
| 1 | 0 | 1 |
| 2 | 0 | 0 |
| 1 | 0 | 0 |
| 1 | 1 | 0 |
| 1 | 0 | 1 |
| 1 | 1 | 0 |
| 1 | 1 | 0 |
| 1 | 0 | 0 |
| 1 | 1 | 0 |
| 2 | 1 | 1 |
| 1 | 0 | 0 |
| 1 | 1 | 0 |
| 1 | 0 | 0 |
| 2 | 1 | 1 |
| 2 | 0 | 1 |
| 1 | 0 | 0 |
| 1 | 1 | 0 |
| 1 | 0 | 0 |
| 1 | 0 | 1 |
| 2 | 0 | 2 |
| 2 | 1 | 1 |
| 1 | 0 | 1 |
| 1 | 0 | 0 |
| 1 | 0 | 1 |
| 1 | 0 | 0 |
| 1 | 0 | 1 |
| 2 | 0 | 2 |

|   |   |   |
|---|---|---|
| 1 | 0 | 1 |
| 2 | 0 | 1 |
| 1 | 0 | 1 |
| 2 | 1 | 1 |
| 1 | 0 | 1 |
| 1 | 0 | 0 |
| 1 | 1 | 0 |
| 1 | 0 | 1 |
| 2 | 0 | 1 |
| 1 | 0 | 1 |
| 1 | 0 | 0 |
| 1 | 0 | 0 |
| 1 | 0 | 1 |
| 3 | 0 | 1 |
| 1 | 1 | 0 |
| 1 | 1 | 0 |
| 1 | 0 | 1 |
| 1 | 0 | 1 |
| 1 | 0 | 1 |
| 1 | 0 | 0 |
| 3 | 1 | 1 |
| 1 | 0 | 1 |
| 1 | 0 | 1 |
| 2 | 1 | 1 |
| 1 | 1 | 0 |
| 1 | 0 | 1 |
| 2 | 0 | 0 |
| 2 | 0 | 1 |
| 1 | 0 | 0 |
| 1 | 0 | 1 |
| 2 | 0 | 1 |
| 1 | 0 | 0 |
| 1 | 0 | 1 |
| 4 | 3 | 1 |
| 2 | 0 | 2 |
| 1 | 0 | 1 |
| 1 | 0 | 1 |
| 3 | 0 | 3 |
| 3 | 1 | 2 |
| 1 | 0 | 1 |
| 1 | 0 | 0 |
| 2 | 2 | 0 |
| 1 | 0 | 1 |
| 1 | 0 | 1 |
| 1 | 0 | 0 |
| 2 | 0 | 2 |
| 3 | 0 | 3 |
| 1 | 0 | 0 |
| 1 | 0 | 1 |
| 1 | 1 | 0 |
| 1 | 0 | 1 |
| 1 | 1 | 0 |
| 1 | 0 | 1 |
| 1 | 0 | 1 |
| 1 | 0 | 0 |

|   |   |   |
|---|---|---|
| 1 | 0 | 1 |
| 1 | 0 | 1 |
| 3 | 1 | 2 |
| 1 | 0 | 1 |
| 1 | 0 | 1 |
| 1 | 0 | 0 |
| 1 | 0 | 1 |
| 1 | 0 | 1 |
| 2 | 0 | 2 |
| 1 | 0 | 1 |
| 3 | 0 | 3 |
| 1 | 0 | 1 |
| 3 | 0 | 2 |
| 3 | 0 | 2 |
| 2 | 0 | 1 |
| 1 | 0 | 0 |
| 1 | 1 | 0 |
| 1 | 0 | 1 |
| 4 | 1 | 1 |
| 2 | 0 | 1 |
| 1 | 1 | 0 |
| 2 | 1 | 1 |
| 1 | 0 | 1 |
| 1 | 0 | 0 |
| 2 | 0 | 0 |
| 4 | 1 | 3 |
| 1 | 0 | 0 |
| 1 | 0 | 0 |
| 1 | 0 | 1 |
| 1 | 0 | 0 |
| 1 | 0 | 1 |
| 1 | 0 | 1 |
| 1 | 0 | 1 |
| 1 | 0 | 0 |
| 1 | 0 | 1 |
| 1 | 0 | 0 |
| 1 | 0 | 0 |
| 1 | 0 | 1 |
| 1 | 0 | 0 |
| 2 | 1 | 1 |
| 1 | 1 | 0 |
| 3 | 0 | 3 |
| 1 | 1 | 0 |
| 1 | 0 | 0 |
| 3 | 0 | 1 |
| 1 | 1 | 0 |
| 2 | 0 | 1 |
| 1 | 0 | 0 |
| 9 | 1 | 6 |
| 1 | 0 | 1 |
| 1 | 0 | 1 |



|   |   |   |
|---|---|---|
| 1 | 0 | 0 |
| 1 | 0 | 0 |
| 1 | 0 | 1 |
| 1 | 0 | 0 |
| 2 | 0 | 2 |
| 1 | 0 | 0 |
| 1 | 0 | 1 |
| 1 | 0 | 1 |
| 1 | 0 | 1 |
| 1 | 0 | 1 |
| 2 | 0 | 2 |
| 1 | 0 | 1 |
| 1 | 0 | 1 |
| 1 | 0 | 1 |
| 1 | 0 | 1 |
| 1 | 0 | 0 |
| 1 | 0 | 1 |
| 1 | 0 | 0 |
| 1 | 0 | 1 |
| 1 | 0 | 0 |
| 1 | 0 | 1 |
| 1 | 1 | 0 |
| 1 | 0 | 1 |
| 2 | 0 | 1 |
| 1 | 0 | 1 |
| 1 | 0 | 1 |
| 1 | 1 | 0 |
| 1 | 0 | 1 |
| 3 | 0 | 3 |
| 2 | 0 | 2 |
| 1 | 0 | 1 |
| 1 | 1 | 0 |
| 1 | 1 | 0 |
| 1 | 0 | 0 |
| 2 | 1 | 1 |
| 1 | 0 | 1 |
| 1 | 0 | 0 |
| 1 | 0 | 1 |
| 1 | 0 | 0 |
| 1 | 0 | 0 |
| 1 | 0 | 1 |
| 1 | 0 | 0 |
| 1 | 0 | 1 |
| 1 | 0 | 0 |
| 1 | 0 | 0 |
| 1 | 0 | 1 |
| 1 | 1 | 0 |
| 1 | 0 | 1 |
| 1 | 0 | 0 |
| 1 | 0 | 1 |
| 1 | 0 | 0 |
| 2 | 0 | 2 |
| 1 | 0 | 0 |
| 2 | 0 | 1 |
| 1 | 0 | 0 |
| 2 | 0 | 2 |
| 1 | 0 | 1 |
| 1 | 0 | 1 |
| 1 | 0 | 0 |



|   |   |   |
|---|---|---|
| 1 | 0 | 0 |
| 2 | 1 | 0 |
| 3 | 2 | 0 |
| 1 | 0 | 0 |
| 1 | 0 | 0 |
| 1 | 0 | 1 |
| 2 | 0 | 2 |
| 1 | 0 | 1 |
| 2 | 0 | 1 |
| 1 | 0 | 1 |
| 1 | 0 | 0 |
| 1 | 0 | 0 |
| 1 | 0 | 1 |
| 1 | 0 | 1 |
| 1 | 0 | 1 |
| 1 | 0 | 1 |
| 1 | 0 | 0 |
| 2 | 1 | 0 |
| 1 | 0 | 1 |
| 1 | 0 | 1 |
| 1 | 0 | 1 |
| 1 | 0 | 1 |
| 1 | 0 | 0 |
| 1 | 0 | 1 |
| 1 | 0 | 1 |
| 1 | 0 | 1 |
| 4 | 0 | 3 |
| 3 | 2 | 0 |
| 1 | 0 | 1 |
| 1 | 0 | 1 |
| 2 | 0 | 0 |
| 1 | 0 | 0 |
| 1 | 1 | 0 |
| 1 | 1 | 0 |
| 2 | 0 | 2 |
| 2 | 1 | 1 |
| 1 | 0 | 1 |
| 1 | 0 | 1 |
| 1 | 1 | 0 |
| 1 | 0 | 1 |
| 1 | 0 | 0 |
| 1 | 0 | 1 |
| 6 | 0 | 6 |
| 1 | 0 | 0 |
| 1 | 0 | 1 |
| 1 | 0 | 0 |
| 2 | 0 | 1 |
| 2 | 0 | 1 |
| 2 | 0 | 2 |
| 1 | 1 | 0 |
| 1 | 0 | 1 |
| 2 | 0 | 2 |
| 1 | 0 | 0 |
| 1 | 0 | 0 |
| 1 | 0 | 1 |
| 1 | 0 | 0 |
| 1 | 0 | 1 |
| 1 | 0 | 0 |



|   |   |   |
|---|---|---|
| 1 | 0 | 0 |
| 1 | 0 | 1 |
| 1 | 0 | 1 |
| 2 | 0 | 1 |
| 1 | 0 | 0 |
| 1 | 0 | 1 |
| 1 | 1 | 0 |
| 1 | 0 | 0 |
| 5 | 1 | 3 |
| 2 | 0 | 1 |
| 1 | 0 | 0 |
| 1 | 0 | 1 |
| 1 | 1 | 0 |
| 2 | 0 | 2 |
| 1 | 1 | 0 |
| 1 | 0 | 0 |
| 2 | 0 | 1 |
| 1 | 0 | 1 |
| 1 | 0 | 1 |
| 1 | 1 | 0 |
| 3 | 0 | 2 |
| 1 | 0 | 1 |
| 2 | 0 | 1 |
| 2 | 0 | 1 |
| 1 | 0 | 0 |
| 1 | 0 | 1 |
| 1 | 0 | 1 |
| 2 | 0 | 0 |
| 2 | 0 | 2 |
| 1 | 1 | 0 |
| 2 | 0 | 0 |
| 1 | 0 | 0 |
| 1 | 0 | 0 |
| 2 | 1 | 0 |
| 1 | 0 | 1 |
| 1 | 0 | 1 |
| 1 | 0 | 1 |
| 2 | 0 | 0 |
| 1 | 0 | 1 |
| 1 | 0 | 1 |
| 1 | 0 | 1 |
| 2 | 0 | 1 |
| 1 | 0 | 1 |
| 1 | 0 | 0 |
| 1 | 0 | 0 |
| 1 | 0 | 0 |
| 1 | 0 | 1 |
| 2 | 0 | 0 |
| 1 | 0 | 0 |
| 5 | 0 | 3 |
| 1 | 0 | 1 |
| 1 | 1 | 0 |
| 3 | 1 | 2 |
| 1 | 0 | 1 |

|   |   |   |
|---|---|---|
| 1 | 0 | 0 |
| 1 | 0 | 1 |
| 3 | 0 | 2 |
| 1 | 0 | 0 |
| 1 | 1 | 0 |
| 1 | 0 | 1 |
| 1 | 0 | 1 |
| 1 | 0 | 1 |
| 1 | 0 | 1 |
| 1 | 0 | 1 |
| 1 | 1 | 0 |
| 1 | 1 | 0 |
| 1 | 0 | 1 |
| 1 | 0 | 0 |
| 1 | 0 | 0 |
| 2 | 0 | 1 |
| 1 | 0 | 0 |
| 1 | 0 | 1 |
| 2 | 0 | 1 |
| 3 | 1 | 2 |
| 1 | 0 | 1 |
| 1 | 0 | 0 |
| 1 | 0 | 0 |
| 1 | 0 | 1 |
| 1 | 0 | 1 |
| 4 | 1 | 2 |
| 1 | 0 | 0 |
| 1 | 0 | 0 |
| 2 | 1 | 1 |
| 1 | 1 | 0 |
| 1 | 0 | 0 |
| 1 | 0 | 1 |
| 1 | 0 | 1 |
| 1 | 0 | 0 |
| 1 | 1 | 0 |
| 2 | 1 | 1 |
| 1 | 0 | 1 |
| 1 | 0 | 0 |
| 1 | 0 | 1 |
| 1 | 0 | 1 |
| 2 | 0 | 2 |
| 2 | 0 | 1 |
| 1 | 0 | 0 |
| 1 | 1 | 0 |
| 1 | 0 | 0 |
| 1 | 0 | 0 |
| 1 | 0 | 1 |
| 1 | 0 | 0 |
| 3 | 1 | 2 |
| 1 | 0 | 0 |
| 2 | 1 | 1 |
| 2 | 0 | 2 |
| 1 | 0 | 1 |
| 1 | 0 | 0 |
| 1 | 0 | 0 |
| 1 | 0 | 1 |
| 0 | 0 | 0 |

|   |   |   |
|---|---|---|
| 1 | 0 | 1 |
| 1 | 0 | 0 |
| 1 | 0 | 0 |
| 2 | 0 | 1 |
| 1 | 0 | 1 |
| 1 | 0 | 1 |
| 1 | 0 | 1 |
| 2 | 0 | 2 |
| 1 | 0 | 1 |
| 1 | 0 | 0 |
| 2 | 0 | 1 |
| 1 | 0 | 1 |
| 1 | 0 | 0 |
| 1 | 0 | 1 |
| 1 | 0 | 1 |
| 4 | 1 | 2 |
| 1 | 0 | 1 |
| 1 | 0 | 1 |
| 1 | 0 | 0 |
| 1 | 0 | 1 |
| 2 | 0 | 1 |
| 1 | 0 | 1 |
| 1 | 0 | 1 |
| 1 | 0 | 1 |
| 4 | 0 | 2 |
| 2 | 0 | 2 |
| 1 | 0 | 1 |
| 1 | 0 | 1 |
| 1 | 0 | 1 |
| 1 | 0 | 1 |
| 1 | 0 | 1 |
| 3 | 0 | 2 |
| 1 | 0 | 1 |
| 1 | 0 | 1 |
| 3 | 0 | 3 |
| 1 | 0 | 0 |
| 1 | 0 | 0 |
| 2 | 1 | 1 |
| 1 | 1 | 0 |
| 1 | 0 | 1 |
| 1 | 0 | 0 |
| 1 | 0 | 1 |
| 1 | 1 | 0 |
| 1 | 0 | 1 |
| 2 | 0 | 0 |
| 1 | 0 | 0 |
| 1 | 1 | 0 |
| 3 | 2 | 0 |
| 1 | 0 | 0 |
| 1 | 0 | 0 |
| 1 | 0 | 1 |
| 1 | 0 | 1 |
| 1 | 0 | 1 |
| 1 | 0 | 1 |











7mer-A1 sites

6mer sites

|   |    |
|---|----|
| 0 | 4  |
| 1 | 3  |
| 3 | 1  |
| 2 | 0  |
| 1 | 1  |
| 0 | 2  |
| 0 | 0  |
| 0 | 0  |
| 2 | 1  |
| 0 | 0  |
| 0 | 0  |
| 2 | 4  |
| 1 | 1  |
| 1 | 37 |
| 0 | 2  |
| 1 | 4  |
| 0 | 0  |
| 0 | 2  |
| 0 | 5  |
| 0 | 0  |
| 0 | 3  |
| 0 | 3  |
| 2 | 0  |
| 0 | 0  |
| 1 | 3  |
| 0 | 1  |
| 0 | 0  |
| 3 | 6  |
| 2 | 7  |
| 2 | 1  |
| 2 | 5  |
| 5 | 2  |
| 1 | 6  |
| 0 | 0  |
| 0 | 0  |
| 0 | 2  |
| 0 | 0  |
| 1 | 1  |
| 2 | 1  |
| 1 | 0  |
| 0 | 1  |
| 1 | 1  |
| 0 | 1  |
| 0 | 1  |
| 2 | 0  |
| 0 | 1  |
| 0 | 2  |
| 0 | 0  |
| 0 | 4  |
| 0 | 4  |
| 0 | 2  |
| 0 | 0  |
| 1 | 1  |

0  
1  
0  
1  
0  
0  
0  
0  
1  
3  
1  
1  
0  
0  
0  
0  
1  
2  
2  
2  
1  
0  
0  
1  
1  
0  
0  
0  
0  
0  
1  
0  
0  
0  
1  
1  
0  
0  
2  
0  
1  
0  
2  
0  
0  
1  
0  
0  
0  
1  
0  
0  
1  
0  
0  
3

3  
0  
3  
0  
1  
0  
1  
0  
1  
3  
0  
1  
1  
1  
0  
0  
0  
0  
3  
1  
1  
0  
0  
0  
0  
0  
0  
2  
5  
0  
1  
1  
0  
0  
5  
1  
0  
3  
0  
5  
4  
0  
0  
0  
0  
4  
0  
2  
0  
0  
0  
0  
5

2  
0  
2  
0  
1  
1  
1  
1  
0  
0  
0  
0  
0  
0  
1  
0  
0  
1  
1  
0  
1  
0  
0  
1  
1  
0  
0  
3  
0  
0  
2  
0  
1  
0  
2  
0  
2  
2  
2  
2  
0  
1  
2  
1  
0  
0  
2  
0  
1  
1  
2  
0

6  
2  
1  
0  
0  
0  
0  
0  
0  
0  
0  
1  
0  
0  
0  
4  
0  
4  
4  
4  
0  
0  
1  
0  
2  
0  
0  
1  
2  
0  
4  
0  
2  
0  
0  
0  
0  
0  
2  
0  
0  
1  
0  
0  
0  
1  
0  
1  
4  
0  
5  
1

1  
1  
1  
0  
0  
0  
1  
0  
0  
1  
0  
0  
0  
1  
0  
0  
1  
0  
0  
0  
0  
2  
0  
0  
2  
3  
1  
0  
1  
0  
0  
1  
2  
0  
0  
0  
0  
0  
0  
0  
1  
1  
2  
2  
2  
0  
2  
0  
0  
1  
1  
0  
0  
0

3  
0  
1  
0  
3  
0  
0  
0  
1  
0  
0  
2  
2  
2  
1  
3  
2  
2  
2  
1  
1  
0  
0  
3  
1  
1  
1  
0  
1  
2  
1  
2  
2  
0  
0  
0  
0  
0  
0  
0  
0  
2  
0  
1  
3  
1  
0  
0  
0  
2  
2  
2  
0  
0  
2

0  
0  
0  
3  
0  
2  
0  
0  
0  
0  
0  
0  
0  
2  
1  
0  
0  
4  
1  
2  
1  
0  
1  
0  
0  
0  
0  
1  
0  
1  
0  
0  
0  
0  
1  
1  
0  
0  
0  
0  
1  
0  
1  
0  
0  
0  
1  
0  
1  
0  
0  
1  
2  
0  
0

2  
2  
0  
2  
0  
1  
1  
0  
2  
0  
1  
0  
1  
0  
0  
1  
0  
0  
1  
3  
0  
0  
0  
0  
1  
0  
0  
0  
0  
0  
1  
1  
0  
1  
1  
0  
2  
1  
2  
0  
0  
2  
4  
1  
2  
0  
1  
1  
0  
1  
1  
0  
0  
0  
3  
0  
0



0  
1  
2  
0  
0  
1  
0  
1  
1  
1  
1  
0  
0  
0  
0  
0  
1  
1  
0  
1  
1  
1  
1  
1  
0  
0  
0  
0  
2  
0  
1  
0  
1  
1  
0  
2  
1  
0  
0  
0  
0  
1  
1  
1  
3  
1  
1  
0  
0  
1  
0  
1  
0  
0  
4

0  
1  
0  
0  
2  
0  
0  
3  
1  
1  
0  
0  
1  
0  
0  
2  
0  
1  
2  
1  
1  
1  
1  
0  
0  
0  
2  
4  
1  
3  
0  
2  
0  
1  
0  
0  
0  
0  
2  
0  
2  
1  
1  
4  
3  
0  
0  
0  
1  
2  
1  
1  
0  
0



0  
1  
0  
0  
0  
1  
0  
0  
2  
0  
2  
2  
0  
0  
1  
0  
0  
1  
0  
0  
1  
0  
1  
0  
0  
0  
2  
0  
0  
1  
0  
0  
1  
0  
1  
0  
0  
0  
0  
0  
0  
1  
1  
1  
1  
0  
1  
0  
0  
0  
0  
1  
0  
1  
0  
0

0  
0  
0  
1  
0  
1  
0  
0  
0  
0  
1  
0  
0  
0  
0  
0  
0  
2  
2  
0  
0  
1  
0  
1  
0  
1  
0  
0  
3  
1  
0  
0  
0  
0  
2  
1  
1  
0  
0  
0  
2  
5  
1  
1  
0  
0  
0  
0  
0  
0  
0  
2  
1  
2  
1  
3  
0

1  
0  
0  
1  
3  
0  
0  
0  
0  
0  
1  
1  
0  
1  
1  
1  
0  
0  
1  
1  
1  
1  
1  
1  
1  
0  
0  
1  
0  
0  
2  
0  
1  
0  
0  
0  
0  
0  
0  
3  
1  
1  
0  
0  
0  
0  
0  
0  
0  
0  
0  
2  
1  
0  
0  
1  
1

0  
0  
0  
0  
0  
0  
3  
0  
0  
0  
0  
0  
1  
0  
0  
0  
0  
1  
1  
1  
0  
0  
1  
0  
0  
1  
0  
1  
0  
0  
0  
0  
0  
1  
0  
1  
1  
2  
0  
0  
1  
0  
6  
1  
0  
1  
1  
1  
4  
1  
1  
0  
0  
0

0  
0  
0  
1  
1  
0  
0  
1  
0  
0  
0  
2  
0  
1  
0  
0  
1  
2  
0  
1  
1  
1  
0  
1  
0  
0  
0  
0  
0  
1  
0  
0  
0  
0  
2  
0  
1  
0  
0  
0  
1  
1  
1  
1  
0  
0  
0  
0  
0  
2  
2  
0  
0  
0  
3  
0

2  
0  
0  
2  
0  
0  
0  
0  
0  
0  
0  
0  
0  
0  
1  
0  
1  
3  
3  
0  
0  
1  
0  
0  
1  
0  
0  
0  
1  
1  
0  
1  
0  
0  
0  
1  
0  
1  
0  
0  
1  
0  
0  
0  
0  
1  
0  
1  
1  
0  
0  
0  
1  
1  
2  
1  
1  
0  
0  
0  
1  
0



1  
3  
0  
1  
0  
1  
0  
0  
0  
2  
0  
1  
0  
0  
0  
0  
0  
0  
3  
1  
2  
0  
1  
1  
1  
2  
0  
1  
1  
0  
0  
1  
0  
1  
0  
1  
0  
1  
1  
3  
1  
0  
0  
0  
0  
0  
3  
1  
1  
1  
0  
0  
0  
1  
1  
0

0  
4  
0  
3  
0  
1  
0  
0  
0  
0  
1  
0  
0  
2  
0  
0  
2  
0  
1  
1  
0  
1  
0  
0  
0  
0  
0  
1  
1  
0  
1  
0  
1  
0  
0  
0  
0  
1  
0  
0  
0  
0  
1  
0  
0  
0  
0  
1  
0  
3  
0  
0  
0  
1  
1  
0  
0

0  
0  
0  
0  
0  
1  
0  
0  
0  
0  
1  
0  
2  
0  
1  
0  
1  
1  
1  
0  
1  
1  
0  
2  
1  
1  
0  
1  
0  
0  
1  
0  
0  
1  
1  
0  
0  
0  
1  
0  
1  
0  
0  
0  
1  
0  
0  
0  
1  
0  
0  
1  
1  
0  
0  
1  
1  
0  
0  
1  
1

0  
1  
3  
0  
1  
0  
0  
4  
2  
2  
1  
1  
1  
2  
0  
0  
0  
2  
0  
2  
0  
0  
0  
0  
1  
1  
3  
0  
0  
0  
1  
0  
0  
1  
0  
0  
1  
1  
2  
0  
0  
0  
1  
0  
0  
0  
2  
1  
1  
1  
1  
0  
0  
1  
0  
0  
0



0  
0  
0  
1  
1  
1  
4  
0  
1  
1  
0  
1  
0  
1  
2  
0  
1  
0  
1  
0  
1  
0  
0  
2  
1  
0  
0  
0  
3  
1  
0  
1  
1  
0  
0  
0  
0  
1  
0  
0  
0  
0  
0  
1  
1  
0  
0  
0  
0  
0  
1  
0  
1  
0

0  
0  
0  
0  
2  
1  
0  
1  
1  
1  
1  
2  
1  
2  
1  
0  
0  
0  
0  
2  
1  
1  
1  
1  
1  
1  
0  
0  
0  
0  
1  
1  
1  
1  
0  
0  
0  
0  
0  
1  
0  
0  
0  
0  
1  
2  
1  
0  
0  
0  
0  
0  
1  
1  
2  
1  
0  
0  
0





1  
0  
1  
1  
1  
0  
1  
0  
1  
1  
0  
0  
0  
0  
1  
1  
0  
0  
0  
0  
0  
1  
0  
0  
0  
1  
0  
2  
2  
0  
1  
0  
1  
1  
1  
0  
0  
0  
0  
2  
0  
0  
0  
0  
1  
0  
1  
0  
0  
0  
1  
0  
0  
1  
1  
0  
0

0  
1  
0  
2  
1  
0  
2  
2  
0  
6  
0  
1  
0  
0  
0  
0  
1  
0  
0  
0  
1  
0  
0  
2  
1  
0  
0  
0  
2  
0  
0  
3  
0  
1  
0  
0  
0  
0  
2  
0  
0  
0  
2  
0  
0  
0  
0  
0  
1  
1  
0  
0



0  
1  
1  
0  
0  
0  
0  
0  
0  
0  
0  
0  
0  
2  
1  
1  
0  
0  
0  
0  
0  
1  
0  
1  
0  
1  
1  
1  
1  
0  
1  
1  
1  
1  
0  
0  
1  
2  
2  
1  
1  
0  
1  
0  
0  
3  
0  
2  
1  
2  
1  
1  
1  
0  
1  
0  
0  
0  
0

0  
1  
1  
1  
0  
0  
0  
1  
0  
2  
4  
0  
2  
5  
1  
1  
0  
1  
0  
1  
0  
0  
0  
0  
0  
2  
0  
1  
0  
0  
0  
0  
1  
2  
0  
0  
2  
2  
1  
0  
0  
0  
0  
0  
2  
4  
0  
1  
1  
0  
0  
0  
0  
1  
0  
4  
1

1  
0  
0  
0  
2  
0  
0  
0  
1  
0  
0  
0  
0  
0  
0  
2  
0  
0  
0  
1  
1  
1  
1  
1  
0  
1  
1  
0  
0  
0  
1  
1  
1  
1  
1  
1  
0  
1  
0  
0  
0  
0  
1  
1  
1  
1  
1  
0  
1  
0  
0  
1  
0  
0  
2  
1  
0

1  
0  
0  
0  
3  
0  
1  
0  
0  
0  
0  
0  
0  
0  
1  
1  
1  
0  
0  
0  
0  
0  
0  
0  
0  
0  
1  
2  
2  
0  
0  
5  
0  
0  
0  
0  
0  
1  
0  
0  
6  
0  
1  
0  
0  
2  
0  
0  
0  
0  
1  
1  
0  
1  
0

0  
1  
1  
1  
0  
1  
0  
1  
1  
0  
0  
1  
0  
0  
0  
2  
1  
0  
0  
0  
0  
0  
0  
1  
1  
0  
1  
0  
0  
2  
0  
1  
1  
1  
1  
1  
0  
1  
0  
1  
0  
1  
0  
0  
0  
1  
0  
0  
0  
1  
0  
0  
1

2  
3  
0  
0  
0  
0  
2  
0  
1  
1  
1  
2  
0  
3  
2  
0  
0  
0  
0  
0  
0  
0  
0  
0  
0  
1  
1  
0  
2  
0  
1  
1  
1  
1  
0  
0  
2  
1  
0  
1  
2  
0  
0  
0  
0  
1  
0  
1  
4  
0  
0  
1  
1  
0  
0



0  
0  
1  
0  
1  
1  
0  
0  
0  
0  
0  
2  
0  
0  
0  
1  
0  
0  
1  
1  
0  
0  
0  
0  
1  
0  
1  
1  
1  
1  
1  
1  
0  
0  
1  
0  
0  
1  
0  
0  
1  
0  
0  
0  
1  
0  
1  
0  
0  
0  
1  
1  
1  
1  
0  
0  
0

0  
0  
1  
0  
0  
0  
0  
1  
0  
0  
1  
0  
1  
0  
0  
3  
0  
0  
0  
0  
0  
0  
1  
0  
0  
2  
0  
1  
1  
1  
1  
2  
0  
0  
0  
0  
0  
1  
0  
0  
3  
1  
1  
0  
0  
2  
0  
0  
4  
1  
0  
0  
0



0  
1  
0  
0  
0  
0  
1  
1  
0  
0  
1  
0  
0  
0  
0  
1  
0  
1  
0  
1  
0  
1  
0  
0  
0  
0  
1  
0  
0  
2  
0  
0  
0  
0  
1  
0  
1  
0  
1  
1  
1  
1  
1  
0  
0  
1  
0  
1  
0  
0  
0  
0  
0  
0  
0  
0  
0  
1

0  
0  
0  
0  
0  
3  
1  
1  
1  
0  
2  
0  
0  
1  
0  
0  
0  
0  
2  
1  
0  
0  
0  
1  
1  
1  
1  
0  
1  
0  
0  
1  
0  
0  
2  
2  
2  
1  
0  
0  
0  
0  
0  
1  
0  
2  
0  
2  
1  
0  
0  
0  
0  
0

0  
1  
0  
0  
1  
0  
1  
1  
0  
1  
0  
1  
0  
1  
1  
1  
1  
0  
1  
0  
1  
0  
1  
0  
0  
1  
1  
1  
1  
0  
1  
1  
1  
1  
1  
1  
0  
0  
1  
2  
0  
1  
0  
1  
0  
1  
0  
0  
1  
0  
0  
1  
1  
1  
1  
1  
1  
0  
1

0  
0  
0  
0  
0  
0  
0  
0  
0  
1  
1  
1  
1  
0  
0  
0  
0  
0  
0  
0  
0  
0  
0  
1  
0  
0  
1  
1  
1  
2  
0  
1  
0  
0  
0  
0  
0  
1  
1  
0  
0  
0  
0  
2  
0  
0  
1  
1  
0  
2  
0  
1

0  
0  
0  
0  
0  
1  
0  
0  
1  
0  
1  
1  
1  
1  
0  
1  
0  
0  
0  
1  
1  
0  
0  
1  
0  
0  
1  
0  
0  
0  
0  
0  
0  
0  
0  
1  
0  
0  
0  
0  
0  
0  
1  
1  
1  
1  
0  
0  
0  
0  
1  
0  
1  
1  
1  
0  
1  
0

2  
0  
0  
2  
1  
2  
1  
0  
0  
2  
0  
0  
1  
0  
0  
0  
0  
2  
1  
0  
0  
0  
0  
0  
2  
1  
0  
0  
0  
0  
1  
0  
0  
0  
0  
2  
2  
0  
4  
0  
0  
0  
1  
2  
0  
0  
2  
1  
0  
0  
0  
0  
1  
2  
1  
0  
0  
1  
1  
1  
0  
1  
0

0  
0  
0  
1  
1  
0  
0  
1  
1  
1  
0  
0  
1  
1  
2  
0  
0  
1  
1  
0  
0  
0  
0  
0  
1  
0  
0  
0  
0  
1  
1  
3  
0  
2  
1  
0  
1  
1  
0  
0  
0  
2  
0  
0  
0  
0  
0  
0  
0  
0  
0  
1  
0  
0

1  
0  
0  
0  
0  
0  
0  
0  
0  
0  
1  
0  
5  
0  
0  
0  
3  
0  
2  
2  
1  
0  
0  
0  
0  
1  
2  
1  
0  
2  
1  
0  
1  
0  
1  
0  
0  
1  
0  
1  
0  
0  
1  
1  
1  
3  
1  
1  
0  
1  
0  
0  
0  
0  
0  
0

1  
0  
2  
0  
1  
0  
0  
1  
0  
0  
0  
0  
0  
1  
2  
2  
0  
0  
0  
2  
1  
0  
1  
1  
1  
0  
0  
0  
0  
1  
0  
0  
0  
0  
1  
1  
1  
1  
1  
0  
1  
1  
0  
0  
0  
0  
0  
2  
0  
0  
0  
0  
1  
0  
3  
1  
0  
1

0  
1  
1  
3  
1  
1  
0  
0  
1  
1  
0  
1  
0  
1  
0  
1  
0  
1  
1  
2  
3  
3  
1  
0  
0  
0  
0  
0  
1  
2  
2  
0  
0  
1  
0  
1  
0  
3  
0  
0  
0  
0  
0  
2  
0  
1  
4  
0  
3  
0  
0  
2  
0  
2  
0

1  
0  
0  
0  
0  
0  
1  
1  
0  
1  
0  
0  
1  
1  
0  
2  
0  
0  
0  
1  
1  
1  
1  
1  
1  
0  
0  
1  
0  
1  
0  
1  
1  
1  
0  
1  
0  
0  
2  
0  
1  
1  
0  
0  
1  
0  
0  
1  
0  
0  
0  
1  
1  
0  
0  
1  
0  
0  
0  
1  
1  
0  
0  
3  
1  
1  
0  
1

0  
0  
0  
0  
1  
0  
1  
0  
0  
0  
0  
0  
1  
1  
1  
2  
0  
1  
1  
0  
1  
1  
1  
1  
1  
2  
1  
0  
1  
0  
1  
0  
0  
1  
0  
0  
0  
0  
0  
1  
0  
0  
0  
0  
2  
0  
2  
0  
0  
0  
3  
0  
0  
4  
0  
0  
1  
0



0  
0  
0  
1  
0  
0  
0  
0  
0  
1  
1  
0  
0  
1  
0  
0  
1  
0  
0  
0  
0  
0  
1  
0  
0  
0  
0  
0  
1  
1  
1  
1  
1  
1  
0  
0  
1  
0  
0  
0  
0  
1  
0  
1  
1  
1  
0  
0  
0  
1  
0  
0

0  
0  
1  
0  
0  
0  
0  
1  
0  
0  
0  
0  
1  
1  
1  
1  
0  
2  
0  
0  
0  
0  
0  
0  
0  
0  
0  
1  
2  
0  
0  
1  
0  
0  
0  
0  
1  
1  
0  
0  
0  
0  
0  
0  
1  
0  
0  
0  
0  
0  
1  
0  
0  
0  
1  
0  
0



1  
0  
0  
0  
0  
1  
1  
0  
0  
1  
0  
0  
0  
1  
1  
0  
0  
0  
1  
1  
0  
0  
1  
1  
0  
0  
1  
1  
1  
0  
1  
1  
0  
0  
0  
0  
1  
1  
0  
0  
0  
1  
1  
0  
0  
2  
1  
1  
0  
0

0  
0  
0  
0  
0  
3  
1  
3  
0  
0  
0  
0  
0  
1  
1  
0  
0  
1  
2  
0  
0  
0  
0  
0  
3  
0  
0  
0  
1  
1  
0  
0  
0  
0  
0  
1  
1  
1  
1  
0  
5  
2  
0  
0  
0  
1  
0  
1  
0  
0  
0  
0  
1  
0



0  
0  
0  
1  
1  
1  
1  
0  
0  
0  
2  
0  
0  
0  
1  
0  
0  
0  
0  
1  
0  
0  
0  
1  
0  
0  
1  
0  
1  
1  
3  
0  
1  
0  
0  
0  
0  
1  
1  
0  
1  
1  
0  
0  
0  
0  
1  
0  
0  
0  
1  
0  
0  
1  
0  
0  
1  
2  
0  
1  
0  
1  
0

0  
0  
0  
0  
1  
0  
1  
3  
2  
0  
1  
0  
0  
0  
0  
0  
0  
0  
0  
1  
1  
1  
0  
0  
0  
4  
0  
0  
0  
1  
1  
0  
2  
0  
0  
0  
0  
0  
0  
0  
0  
0  
1  
1  
0  
0  
0  
1  
0  
0  
0  
0  
0  
0  
0  
0  
0  
0

1  
1  
0  
0  
0  
1  
1  
1  
1  
1  
0  
1  
0  
1  
0  
0  
0  
0  
1  
1  
1  
1  
1  
1  
0  
1  
1  
1  
0  
0  
0  
0  
1  
1  
1  
0  
1  
0  
0  
0  
0  
0  
1  
0  
0  
1  
0  
1  
0  
0  
0  
0  
1  
0  
1  
0  
0  
0  
0

0  
0  
1  
0  
1  
2  
2  
1  
2  
1  
1  
4  
1  
1  
0  
0  
0  
0  
1  
1  
0  
0  
0  
0  
0  
0  
0  
1  
1  
1  
0  
1  
0  
1  
0  
0  
1  
0  
4  
0  
0  
2  
1  
0  
0  
0  
0  
3  
0  
1  
1  
0  
0

1  
1  
0  
0  
0  
0  
1  
0  
0  
1  
1  
1  
1  
0  
0  
0  
1  
0  
0  
0  
1  
1  
0  
0  
1  
0  
1  
0  
1  
0  
1  
0  
0  
0  
1  
0  
0  
1  
0  
3  
1  
1  
0  
0  
1  
3  
1  
1  
0  
1  
1  
1  
0  
0  
1  
0  
1  
1  
1  
1  
1  
1  
0  
1

0  
0  
0  
0  
0  
2  
0  
1  
0  
3  
1  
2  
0  
0  
0  
0  
1  
0  
1  
1  
0  
0  
0  
2  
0  
0  
0  
1  
1  
1  
0  
2  
0  
0  
0  
1  
1  
1  
0  
2  
0  
0  
4  
0  
1  
0  
2  
0  
1  
2  
0  
0  
1  
0  
0  
0  
0  
0  
0  
0  
0  
1  
2





0  
1  
1  
0  
1  
0  
0  
0  
1  
1  
1  
1  
1  
1  
2  
0  
0  
1  
2  
0  
0  
0  
1  
1  
0  
0  
1  
0  
1  
0  
1  
0  
0  
0  
1  
1  
0  
0  
0  
0  
1  
0  
0  
0  
1  
1  
0  
0  
0  
1  
1  
0  
0  
0

1  
0  
0  
0  
0  
0  
0  
1  
0  
0  
3  
0  
0  
2  
0  
0  
1  
1  
1  
0  
1  
0  
0  
0  
0  
3  
0  
2  
2  
3  
1  
1  
2  
0  
0  
1  
2  
0  
0  
0  
0  
0  
0  
1  
2  
0  
2  
0  
0  
0  
1  
0  
1  
3  
1

1  
0  
0  
1  
0  
0  
0  
0  
0  
0  
0  
0  
0  
1  
1  
1  
0  
3  
0  
2  
1  
1  
0  
0  
0  
0  
1  
0  
1  
1  
0  
1  
1  
1  
1  
0  
0  
0  
1  
0  
0  
0  
1  
1  
0  
0  
0  
1  
0  
0  
1  
0  
0  
1  
1  
1  
1  
0  
0

1  
1  
1  
1  
1  
0  
0  
0  
0  
0  
2  
0  
0  
0  
0  
0  
0  
1  
0  
2  
2  
4  
0  
0  
0  
1  
0  
1  
0  
0  
0  
0  
1  
0  
0  
0  
0  
1  
0  
3  
0  
0  
0  
0  
0  
0  
1  
3  
1  
0  
1  
0  
0  
0  
0  
0



1  
1  
0  
1  
1  
0  
0  
1  
1  
1  
1  
0  
1  
0  
1  
0  
0  
0  
1  
0  
1  
0  
1  
0  
1  
0  
0  
0  
2  
0  
1  
0  
1  
1  
1  
1  
1  
1  
2  
0  
0  
0  
1  
0  
0  
3  
1  
1  
1  
1  
1  
0  
1  
0  
0  
0

0  
0  
0  
1  
0  
0  
1  
2  
1  
2  
2  
2  
1  
1  
2  
2  
0  
0  
0  
0  
2  
0  
3  
0  
0  
1  
1  
1  
0  
0  
3  
0  
0  
0  
0  
1  
0  
2  
1  
0  
0  
0  
0  
1  
0  
1  
1  
1  
0  
0  
0  
2  
0  
1  
0  
4

1  
2  
0  
0  
0  
0  
1  
0  
2  
1  
1  
1  
1  
0  
1  
0  
0  
1  
0  
0  
0  
0  
0  
0  
0  
0  
1  
0  
0  
0  
0  
1  
0  
0  
1  
1  
1  
1  
0  
0  
0  
0  
0  
0  
1  
0  
0  
0  
0  
2  
0  
1  
1

1  
0  
0  
0  
2  
4  
0  
2  
0  
2  
2  
2  
1  
0  
0  
1  
1  
0  
1  
0  
0  
0  
0  
4  
2  
0  
0  
0  
0  
0  
0  
1  
1  
0  
0  
2  
1  
0  
1  
2  
0  
0  
1  
0  
0  
1  
0  
0  
1  
0  
0  
2  
0  
1  
1  
0  
0  
0

0  
1  
0  
1  
1  
2  
1  
0  
0  
0  
0  
1  
1  
0  
1  
0  
0  
0  
0  
1  
0  
1  
1  
0  
1  
0  
0  
0  
1  
0  
0  
0  
0  
1  
1  
0  
1  
1  
1  
1  
1  
2  
0  
0  
1  
0  
0  
0  
1  
1  
1  
1  
1  
0  
0  
0

0  
1  
0  
0  
1  
2  
0  
2  
0  
0  
3  
0  
2  
1  
0  
0  
0  
0  
0  
0  
1  
0  
3  
0  
1  
2  
0  
0  
0  
3  
0  
0  
1  
0  
1  
0  
0  
1  
1  
1  
0  
0  
0  
0  
1  
0  
0  
1  
0  
0  
0



0  
1  
0  
0  
0  
0  
0  
1  
1  
0  
1  
1  
1  
1  
2  
0  
2  
0  
1  
0  
0  
1  
0  
0  
1  
0  
1  
1  
0  
1  
1  
0  
1  
0  
1  
0  
0  
0  
1  
0  
0  
0  
1  
1  
1  
1  
0  
0  
1  
0  
1  
1  
1  
0  
0  
0

0  
2  
1  
3  
1  
2  
1  
0  
1  
1  
0  
2  
2  
0  
0  
2  
0  
1  
0  
0  
1  
0  
0  
1  
0  
2  
0  
0  
2  
0  
3  
0  
1  
0  
1  
0  
0  
0  
0  
0  
1  
1  
1  
0  
0  
0  
0  
0  
0  
2  
1  
2  
0  
1  
0



2  
0  
0  
1  
0  
0  
0  
0  
0  
0  
0  
0  
1  
0  
1  
0  
0  
0  
0  
0  
1  
1  
1  
1  
1  
0  
1  
1  
0  
0  
0  
0  
1  
0  
0  
1  
0  
0  
0  
0  
0  
1  
0  
0  
0  
0  
1  
0  
1  
2  
0  
1  
0  
0  
0

0  
1  
0  
0  
0  
0  
0  
1  
1  
1  
0  
1  
0  
0  
0  
0  
1  
1  
1  
2  
0  
0  
0  
0  
0  
0  
0  
0  
0  
0  
0  
0  
0  
0  
0  
0  
1  
1  
1  
0  
0  
1  
0  
0  
0  
0  
0  
1  
1  
1  
3  
0  
0  
0  
0

0  
0  
0  
1  
0  
0  
1  
1  
0  
1  
1  
1  
1  
1  
1  
1  
0  
0  
0  
1  
1  
1  
0  
0  
1  
1  
0  
0  
0  
1  
1  
0  
1  
0  
0  
1  
0  
1  
1  
1  
1  
1  
1  
0  
0  
1  
0  
0

1  
0  
1  
3  
0  
1  
0  
0  
0  
1  
0  
2  
0  
0  
1  
1  
0  
0  
0  
1  
0  
1  
0  
1  
0  
1  
0  
0  
1  
0  
0  
1  
0  
0  
1  
0  
0  
2  
2  
1  
0  
3  
0  
0  
0  
0  
0  
1  
2  
0  
0  
0  
0  
1  
4

2  
1  
0  
0  
0  
0  
0  
0  
1  
0  
1  
1  
1  
0  
0  
1  
0  
0  
0  
0  
0  
1  
1  
0  
0  
0  
0  
1  
0  
1  
0  
1  
1  
1  
0  
0  
2  
1  
1  
1  
2  
1  
1  
1  
1  
1  
0  
0  
0  
1  
0  
1  
2  
0  
1  
2  
1

0  
0  
2  
1  
0  
0  
1  
0  
2  
2  
3  
0  
1  
2  
2  
0  
2  
4  
1  
2  
0  
0  
1  
1  
0  
0  
0  
1  
0  
1  
0  
1  
0  
1  
0  
0  
0  
0  
1  
1  
1  
4  
1  
0  
0  
2  
0  
0  
0  
0  
0  
0  
0  
0

1  
0  
0  
0  
1  
1  
0  
0  
0  
0  
0  
1  
0  
1  
0  
1  
0  
0  
0  
0  
1  
1  
0  
1  
0  
0  
0  
0  
1  
1  
0  
1  
2  
1  
1  
1  
0  
1  
0  
1  
1  
0  
0  
1  
0  
0  
0  
0  
0  
1  
1

1  
0  
0  
1  
0  
2  
0  
0  
0  
0  
1  
3  
0  
0  
2  
0  
0  
0  
0  
0  
1  
0  
2  
0  
0  
0  
0  
0  
2  
0  
0  
0  
0  
1  
0  
1  
1  
0  
0  
0  
4  
0  
0  
1  
0  
0  
0  
0  
0  
0  
0  
3  
0  
0  
1



0  
0  
1  
0  
1  
0  
0  
1  
0  
0  
1  
0  
1  
0  
0  
0  
0  
1  
0  
0  
0  
0  
1  
0  
1  
0  
1  
1  
0  
1  
1  
0  
0  
0  
0  
1  
0  
0  
1  
0  
0  
2  
0  
1  
0  
0  
0  
2  
1  
1  
1  
1  
0  
0  
0  
0  
1  
1

2  
1  
0  
3  
2  
1  
0  
0  
0  
0  
0  
1  
0  
0  
0  
0  
2  
0  
0  
0  
1  
3  
0  
1  
1  
0  
0  
0  
0  
0  
2  
0  
2  
2  
0  
1  
0  
2  
0  
2  
0  
0  
1  
0  
2  
2  
0  
0  
0  
0  
0  
1  
0  
0

0  
0  
2  
1  
0  
0  
0  
0  
0  
0  
0  
2  
0  
0  
0  
1  
1  
1  
1  
1  
0  
1  
0  
1  
1  
1  
0  
0  
0  
1  
1  
0  
1  
1  
1  
0  
0  
0  
0  
0  
0  
1  
0  
1  
1  
1  
0  
1  
0  
0  
0  
0  
1  
0  
1  
1  
1  
0  
0  
2

1  
0  
2  
0  
2  
0  
0  
0  
0  
0  
0  
0  
1  
0  
0  
0  
1  
0  
0  
1  
1  
2  
1  
1  
1  
1  
0  
0  
0  
1  
0  
0  
1  
2  
0  
0  
0  
0  
0  
0  
0  
0  
1  
0  
1  
1  
1  
0  
1  
0

0  
1  
0  
0  
0  
1  
0  
0  
0  
1  
0  
0  
1  
0  
0  
1  
1  
1  
3  
1  
0  
1  
0  
1  
1  
0  
0  
0  
2  
0  
0  
0  
0  
1  
0  
1  
0  
0  
0  
0  
0  
0  
1  
0  
0  
2  
1  
1  
1  
0  
0  
0  
0  
0  
0  
0  
0  
0  
0

0  
0  
4  
1  
1  
1  
1  
2  
0  
0  
0  
0  
0  
0  
0  
0  
0  
1  
0  
0  
0  
2  
0  
0  
1  
1  
0  
1  
1  
0  
1  
0  
2  
0  
0  
0  
0  
1  
1  
3  
1  
0  
1  
0  
1  
1  
0  
1  
1  
0  
0  
0  
0



0  
0  
0  
0  
0  
0  
0  
0  
0  
5  
0  
0  
1  
0  
0  
0  
2  
0  
1  
0  
1  
0  
0  
1  
1  
0  
0  
0  
1  
0  
1  
0  
1  
0  
1  
1  
1  
1  
0  
1  
1  
0  
0  
2  
0  
0  
1  
0  
1  
1  
1  
1  
0  
0  
2  
1  
0  
1

0  
0  
0  
1  
0  
0  
0  
2  
1  
1  
0  
1  
1  
0  
0  
0  
0  
1  
0  
1  
0  
0  
1  
1  
1  
0  
0  
0  
0  
0  
0  
3  
0  
1  
0  
0  
1  
0  
0  
2  
0  
0  
1  
2  
1  
4  
0  
0  
0  
0  
0  
0  
0  
0  
0

3  
2  
0  
0  
0  
0  
0  
0  
0  
0  
0  
0  
1  
1  
1  
1  
1  
1  
0  
1  
0  
1  
0  
0  
0  
0  
1  
2  
1  
1  
0  
0  
0  
0  
1  
0  
0  
0  
0  
0  
0  
1  
0  
0  
1  
1  
0  
1  
0  
1  
0  
1  
1  
3  
0  
1  
1  
1  
0  
0

0  
2  
2  
0  
1  
2  
2  
0  
1  
0  
0  
1  
0  
0  
0  
2  
2  
0  
1  
1  
1  
1  
0  
0  
1  
0  
1  
0  
2  
7  
0  
0  
0  
0  
1  
0  
0  
1  
0  
0  
1  
2  
1  
2  
1  
2  
1  
0  
2

0  
0  
1  
1  
0  
1  
0  
1  
0  
1  
1  
1  
1  
1  
0  
0  
0  
0  
0  
0  
0  
1  
0  
1  
0  
0  
0  
0  
0  
0  
0  
2  
1  
1  
0  
0  
0  
0  
1  
0  
0  
0  
0  
0  
0  
0  
0  
0  
0  
0  
0  
0  
0  
0  
0  
0  
1  
0  
0  
0

1  
0  
0  
0  
0  
1  
0  
0  
0  
0  
1  
2  
3  
0  
0  
0  
0  
1  
1  
1  
0  
0  
1  
0  
0  
0  
0  
0  
0  
0  
0  
0  
0  
1  
4  
0  
1  
0  
1  
0  
0  
0  
0  
0  
0  
0  
0  
0  
0  
0  
1  
0  
0  
2  
0  
0  
0  
0  
0

1  
0  
0  
0  
0  
0  
0  
0  
1  
1  
2  
1  
1  
1  
0  
0  
0  
3  
0  
1  
0  
0  
0  
0  
0  
0  
0  
0  
0  
1  
0  
0  
0  
0  
0  
0  
0  
0  
1  
1  
0  
0  
2  
0  
0  
1  
1  
0  
0  
2  
1  
1  
0  
0  
1

1  
0  
0  
1  
0  
1  
0  
0  
0  
0  
0  
0  
0  
1  
1  
0  
0  
0  
2  
3  
0  
0  
1  
0  
0  
1  
2  
1  
1  
1  
1  
1  
0  
0  
0  
1  
1  
0  
0  
3  
0  
0  
1  
1  
0  
0  
0  
1  
1  
0  
1  
3  
0  
0  
1  
1  
0  
0

0  
0  
1  
1  
1  
0  
0  
0  
0  
1  
1  
0  
0  
1  
1  
0  
0  
0  
0  
0  
1  
1  
0  
0  
0  
0  
0  
1  
0  
1  
1  
1  
1  
1  
1  
1  
1  
1  
1  
0  
1  
0  
1  
0  
0  
1  
1  
1  
0  
0  
1  
1  
1  
0  
1

0  
0  
1  
0  
1  
1  
2  
1  
3  
0  
2  
1  
0  
1  
1  
2  
0  
0  
0  
1  
1  
0  
0  
0  
2  
2  
1  
0  
2  
2  
1  
1  
1  
1  
0  
1  
1  
1  
1  
2  
2  
2  
0  
0  
0  
0  
0  
5  
3  
1  
2  
1  
0  
1  
1  
1

1  
0  
0  
0  
1  
0  
1  
0  
1  
1  
1  
1  
1  
0  
1  
0  
0  
1  
0  
0  
0  
1  
0  
0  
1  
1  
1  
1  
0  
1  
0  
1  
0  
0  
0  
2  
1  
0  
0  
0  
0  
2  
1  
1  
0  
1  
0  
0  
2  
0  
0  
0

1  
0  
1  
0  
0  
0  
0  
1  
1  
2  
1  
1  
0  
1  
1  
0  
0  
0  
0  
1  
0  
0  
2  
0  
4  
1  
0  
0  
1  
0  
1  
1  
1  
0  
1  
1  
0  
1  
2  
0  
1  
0  
0  
0  
1  
1  
1  
0  
0  
3  
1  
2  
1  
0  
0

0  
0  
0  
0  
0  
0  
1  
1  
1  
1  
1  
0  
0  
0  
0  
0  
1  
0  
1  
1  
1  
0  
1  
0  
2  
0  
0  
0  
0  
0  
1  
0  
0  
0  
0  
1  
0  
0  
0  
0  
0  
0  
0  
0  
0  
0  
2  
0  
0  
0  
0  
0  
0  
0  
0  
1  
1  
1  
0

0  
0  
1  
0  
3  
0  
0  
0  
0  
0  
2  
1  
1  
0  
1  
0  
0  
1  
0  
1  
1  
1  
2  
3  
1  
21  
1  
1  
0  
1  
0  
0  
0  
0  
0  
2  
0  
0  
3  
0  
1  
2  
0  
0  
0  
0  
0  
0  
0  
0  
0  
1  
0  
1  
0





0  
2  
1  
1  
0  
0  
1  
0  
0  
0  
0  
1  
0  
0  
0  
0  
0  
1  
1  
1  
1  
2  
1  
0  
0  
0  
1  
0  
1  
0  
0  
0  
0  
0  
1  
0  
0  
1  
0  
0  
1  
0  
0  
0  
0  
1  
1  
0  
0  
0  
0  
1  
0

2  
0  
2  
0  
1  
1  
1  
0  
1  
0  
1  
1  
1  
1  
0  
2  
2  
2  
1  
0  
0  
0  
2  
0  
0  
0  
0  
0  
0  
0  
0  
2  
2  
2  
0  
1  
1  
0  
2  
0  
0  
0  
1  
1  
2  
1  
2  
0  
0  
3  
1  
1  
1  
1  
2  
0  
0

0  
0  
0  
1  
0  
0  
1  
0  
0  
0  
0  
0  
0  
0  
0  
0  
0  
2  
0  
0  
0  
0  
0  
1  
1  
1  
1  
0  
1  
2  
0  
1  
1  
1  
0  
0  
3  
0  
0  
0  
0  
1  
0  
1  
1  
1  
1  
0  
1  
0  
0  
0  
0  
1  
0  
1  
0

0  
0  
1  
0  
0  
1  
2  
2  
0  
0  
0  
1  
0  
0  
0  
0  
1  
0  
1  
1  
1  
0  
0  
1  
0  
1  
1  
0  
0  
0  
2  
2  
0  
1  
1  
0  
0  
0  
0  
2  
1  
0  
1  
0  
0  
1  
0  
0  
1  
0  
0  
0  
3  
2  
2  
2  
2  
1

0  
1  
0  
0  
0  
1  
0  
1  
0  
0  
0  
0  
1  
1  
0  
1  
2  
0  
1  
0  
0  
0  
1  
0  
0  
0  
0  
0  
1  
0  
0  
1  
2  
0  
0  
1  
0  
0  
1  
1  
0  
1  
1  
0  
1  
0  
0  
0  
0  
1  
0  
0  
1  
0  
0  
1

0  
1  
1  
2  
0  
1  
0  
0  
0  
1  
1  
2  
0  
0  
2  
3  
0  
0  
0  
4  
1  
1  
1  
1  
0  
0  
0  
0  
0  
0  
0  
1  
0  
0  
0  
0  
2  
0  
2  
1  
1  
0  
5  
0  
2  
1  
1  
0  
0  
0  
0  
0  
0  
1  
5





0  
0  
2  
0  
0  
0  
0  
0  
1  
0  
0  
1  
0  
2  
0  
0  
0  
0  
0  
0  
0  
0  
0  
0  
0  
0  
1  
1  
1  
1  
0  
1  
0  
0  
1  
0  
0  
0  
0  
0  
0  
1  
0  
1  
1  
1  
1  
1  
0  
0  
1  
0  
0  
0  
0

2  
1  
2  
1  
5  
0  
0  
0  
0  
1  
0  
2  
0  
0  
1  
1  
1  
1  
1  
0  
1  
0  
1  
1  
1  
1  
0  
1  
1  
0  
0  
1  
0  
2  
1  
2  
0  
1  
1  
1  
1  
0  
0  
0  
1  
2  
1  
1  
1  
0  
0  
2  
0  
0  
1

1  
0  
0  
0  
1  
1  
0  
1  
0  
0  
0  
0  
0  
0  
0  
0  
0  
1  
0  
0  
0  
2  
0  
1  
0  
0  
0  
0  
1  
0  
1  
0  
1  
0  
1  
1  
0  
0  
0  
1  
0  
0  
0  
0  
1  
0  
0  
0  
1  
1  
0  
0  
1  
0  
1  
0  
1  
0  
0  
2  
1

2  
0  
0  
1  
0  
3  
1  
2  
0  
0  
0  
1  
0  
1  
0  
1  
2  
0  
2  
0  
2  
2  
0  
0  
0  
0  
0  
1  
3  
2  
0  
2  
0  
0  
0  
0  
1  
0  
0  
1  
0  
0  
0  
2  
2  
0  
3  
0  
0  
1  
1  
3  
0  
0  
0  
0  
1  
4  
1  
0

0  
0  
0  
0  
2  
0  
0  
0  
1  
0  
0  
1  
1  
0  
0  
0  
0  
1  
0  
0  
0  
1  
0  
0  
0  
0  
0  
0  
0  
0  
0  
1  
0  
0  
0  
0  
0  
1  
0  
0  
0  
0  
1  
1  
2  
1  
0  
0  
0  
1  
1  
0  
0

1  
1  
0  
1  
0  
0  
2  
5  
0  
2  
1  
0  
0  
0  
1  
0  
1  
1  
1  
1  
0  
1  
0  
0  
0  
0  
1  
2  
0  
0  
0  
1  
0  
0  
2  
0  
0  
1  
2  
0  
0  
1  
2  
0  
4  
0  
0  
1  
1  
0  
1  
1  
4  
1



0  
0  
0  
0  
1  
0  
0  
0  
1  
0  
0  
0  
0  
1  
0  
0  
0  
0  
0  
1  
0  
0  
0  
0  
0  
1  
0  
0  
1  
0  
0  
0  
0  
0  
0  
0  
0  
0  
0  
1  
1  
0  
0  
0  
0  
1  
0  
0  
0  
0  
0  
1  
0  
1  
0  
0

1  
1  
0  
0  
3  
0  
1  
0  
0  
0  
1  
0  
1  
0  
0  
1  
1  
1  
2  
1  
1  
1  
1  
3  
1  
0  
0  
3  
1  
2  
1  
1  
3  
0  
0  
1  
4  
3  
5  
0  
1  
0  
0  
1  
2  
0  
0  
0  
1  
0  
0  
0  
1  
1  
0  
0  
1  
1



0  
1  
1  
1  
1  
1  
0  
0  
0  
2  
0  
2  
1  
0  
0  
0  
0  
0  
1  
0  
0  
1  
1  
0  
1  
0  
1  
1  
0  
0  
0  
0  
0  
0  
1  
0  
0  
1  
1  
0  
1  
0  
0  
0  
0  
0  
0  
1  
0  
0  
1  
1  
1  
0

0  
0  
0  
3  
4  
0  
0  
0  
0  
0  
1  
0  
0  
0  
0  
0  
1  
3  
0  
2  
0  
2  
0  
0  
2  
0  
0  
0  
1  
0  
2  
0  
0  
1  
0  
3  
0  
3  
3  
0  
0  
0  
0  
2  
0  
0  
0  
0  
1  
0  
0  
0  
0  
0  
0  
0



0  
1  
1  
0  
0  
1  
1  
0  
0  
0  
1  
0  
1  
0  
0  
0  
0  
0  
0  
0  
1  
0  
0  
0  
0  
1  
1  
0  
1  
1  
0  
0  
1  
0  
0  
0  
0  
0  
0  
0  
0  
1  
1  
1  
1  
0  
0  
1  
0  
0  
0  
0  
1  
0  
0  
0  
1  
0  
0  
0

3  
3  
0  
1  
0  
1  
1  
1  
0  
1  
1  
1  
1  
0  
0  
1  
1  
1  
1  
0  
0  
1  
1  
1  
1  
0  
0  
1  
1  
0  
0  
0  
1  
1  
0  
0  
1  
1  
0  
0  
0  
3  
1  
0  
0  
2  
0  
1  
0  
1  
0  
1  
0  
0  
0  
0  
0  
1  
0  
1  
2  
2

0  
0  
1  
0  
0  
0  
0  
1  
1  
0  
0  
0  
0  
1  
1  
0  
0  
0  
0  
0  
1  
0  
1  
2  
0  
0  
1  
0  
0  
0  
0  
0  
0  
1  
0  
0  
0  
0  
0  
1  
0  
0  
0  
1  
0  
0  
1  
0  
0  
0  
1  
0  
0  
0  
1  
0  
0  
0  
1  
0  
0  
0  
0  
1

0  
2  
1  
2  
0  
0  
1  
0  
1  
0  
0  
0  
2  
1  
0  
1  
0  
0  
1  
0  
0  
1  
0  
1  
1  
1  
0  
6  
0  
0  
4  
0  
1  
0  
1  
1  
0  
0  
0  
1  
0  
3  
1  
0  
0  
0  
0  
0  
0  
0  
1  
1  
0  
0  
0  
0  
1  
1  
0  
0

1  
2  
0  
0  
0  
0  
0  
0  
0  
0  
0  
0  
0  
1  
0  
0  
1  
1  
0  
0  
0  
1  
0  
0  
1  
0  
1  
1  
1  
0  
2  
2  
0  
0  
0  
0  
0  
0  
1  
0  
0  
0  
0  
1  
1  
1  
0  
0  
0  
0  
1  
0  
0  
1  
1  
1  
0  
0  
0  
1  
0  
1  
1  
0  
0

0  
1  
0  
1  
0  
1  
1  
0  
0  
2  
0  
1  
1  
0  
1  
1  
1  
1  
0  
0  
0  
0  
3  
1  
1  
0  
0  
3  
1  
1  
0  
1  
1  
0  
2  
0  
0  
1  
1  
0  
2  
1  
0  
2  
1  
1  
0  
0  
1  
1  
1  
2  
0  
0  
2  
1

0  
0  
0  
1  
1  
0  
1  
1  
1  
1  
0  
1  
1  
1  
0  
0  
0  
0  
0  
0  
0  
1  
0  
1  
1  
0  
0  
0  
0  
0  
0  
0  
0  
0  
0  
0  
0  
0  
0  
1  
2  
0  
0  
0  
1  
0  
0  
0  
1  
1  
1  
1  
0  
1  
1  
0  
0

0  
0  
0  
1  
0  
0  
0  
1  
0  
0  
0  
1  
2  
0  
1  
0  
1  
0  
4  
0  
2  
0  
0  
1  
3  
1  
0  
2  
2  
2  
0  
0  
1  
1  
3  
0  
1  
0  
1  
0  
0  
0  
1  
1  
1  
1  
1  
1  
3  
1  
1  
3  
0













0  
0  
1  
0  
0  
0  
0  
0  
0  
1  
0  
0  
0  
0  
1  
0  
0  
1  
0  
0  
0  
0  
0  
0  
1  
0  
0  
0  
0  
1  
0  
0  
0  
0  
0  
0  
1  
1  
1  
1  
0  
0  
0  
0  
0  
0  
1  
1  
0  
0  
0  
0  
0  
0  
1  
1  
0  
0  
1

0  
1  
0  
0  
0  
0  
0  
0  
0  
0  
0  
0  
1  
0  
1  
1  
0  
1  
1  
0  
1  
1  
0  
0  
0  
0  
0  
1  
1  
1  
1  
0  
2  
0  
0  
1  
1  
1  
0  
0  
2  
0  
2  
0  
0  
0  
1  
1  
0  
0  
2  
0  
0  
1  
0



0  
0  
1  
2  
0  
1  
0  
0  
0  
1  
0  
1  
1  
0  
0  
0  
1  
0  
1  
0  
0  
0  
0  
0  
1  
0  
0  
0  
0  
0  
0  
0  
0  
0  
0  
0  
0  
0  
0  
0  
0  
1  
1  
0  
1  
0  
1  
0  
1  
0  
0  
0  
0  
0  
1  
2  
1  
0  
0  
0

0  
1  
2  
1  
1  
1  
0  
0  
2  
0  
0  
0  
0  
0  
0  
3  
4  
1  
0  
0  
0  
1  
0  
0  
0  
0  
1  
1  
0  
0  
1  
0  
0  
0  
0  
0  
1  
0  
1  
2  
0  
1  
2  
0  
0  
5  
0  
0  
1  
1  
1  
0  
1



0  
0  
0  
0  
0  
1  
1  
4  
0  
1  
1  
1  
0  
0  
0  
0  
1  
0  
2  
0  
0  
1  
0  
0  
0  
1  
0  
1  
1  
0  
0  
0  
0  
0  
1  
0  
0  
0  
0  
0  
0  
0  
0  
0  
0  
0  
0  
0  
0  
0  
0  
0  
0  
2  
0  
0  
1  
0  
0  
1  
0

1  
0  
1  
0  
1  
2  
0  
1  
0  
0  
0  
0  
0  
3  
2  
1  
0  
0  
0  
0  
0  
3  
2  
0  
0  
0  
0  
1  
0  
0  
2  
0  
1  
2  
0  
1  
2  
0  
3  
0  
0  
1  
1  
0  
0  
0  
0  
0  
0  
1  
0  
1  
0  
0  
0



2  
0  
0  
0  
0  
2  
0  
1  
1  
1  
1  
0  
1  
1  
1  
1  
1  
1  
1  
1  
1  
1  
0  
1  
1  
1  
1  
0  
1  
1  
1  
1  
1  
1  
1  
1  
1  
0  
1  
0  
0  
0  
2  
1  
1  
0  
0  
0  
1  
0  
0  
0  
0  
1  
0  
0

0  
0  
0  
1  
0  
0  
0  
0  
0  
0  
0  
3  
0  
3  
0  
0  
1  
1  
0  
2  
1  
2  
0  
2  
2  
0  
0  
0  
0  
1  
0  
0  
0  
0  
0  
0  
0  
0  
0  
0  
0  
0  
0  
0  
0  
1  
0  
0  
0  
0  
0  
0  
0  
0  
0  
0  
1  
0

1  
0  
0  
0  
0  
1  
0  
0  
0  
1  
0  
0  
1  
1  
0  
1  
0  
1  
0  
1  
0  
0  
0  
0  
0  
0  
1  
0  
0  
1  
1  
2  
0  
0  
1  
1  
0  
0  
0  
0  
0  
1  
0  
1  
0  
0  
0  
0  
0  
0  
1  
0  
1  
0  
0  
0  
0  
1  
0  
1  
0  
0  
0

1  
0  
0  
2  
0  
1  
0  
0  
1  
0  
0  
0  
1  
2  
0  
0  
1  
1  
0  
0  
0  
0  
0  
1  
0  
0  
0  
1  
1  
0  
0  
0  
0  
1  
0  
0  
2  
0  
0  
2  
0  
0  
0  
0  
0  
0  
0  
0  
2  
0  
1  
1  
0

0  
0  
0  
1  
0  
1  
1  
0  
0  
0  
1  
0  
0  
0  
0  
0  
0  
0  
0  
0  
0  
0  
0  
0  
0  
1  
1  
0  
0  
0  
0  
2  
0  
1  
0  
0  
0  
0  
0  
0  
1  
0  
0  
0  
0  
0  
0  
0  
0  
0  
0  
0  
0  
0  
1  
1  
0  
0  
1  
0  
0  
1

0  
0  
1  
0  
1  
2  
1  
0  
2  
1  
0  
0  
0  
1  
0  
1  
1  
0  
1  
0  
0  
0  
0  
2  
0  
0  
0  
1  
0  
0  
0  
0  
0  
0  
0  
0  
0  
0  
0  
0  
0  
0  
0  
0  
0  
0  
2  
1  
0  
2  
0  
0  
1  
0  
1  
1

1  
1  
2  
1  
1  
1  
0  
0  
0  
0  
0  
2  
0  
1  
0  
0  
1  
0  
0  
1  
0  
1  
0  
1  
4  
0  
0  
0  
0  
1  
0  
0  
0  
0  
0  
1  
0  
1  
0  
0  
1  
0  
1  
0  
0  
0  
0  
0  
0  
0  
0  
1  
1  
1  
1  
1  
0

0  
0  
1  
0  
0  
0  
0  
0  
0  
0  
2  
0  
1  
1  
0  
0  
0  
0  
2  
2  
2  
0  
1  
0  
0  
0  
1  
5  
2  
0  
0  
0  
3  
0  
0  
0  
0  
0  
0  
1  
0  
0  
1  
1  
2  
0  
3  
0  
0  
0









1  
1  
0  
1  
0  
1  
0  
0  
0  
0  
0  
0  
0  
0  
0  
0  
1  
0  
1  
0  
0  
0  
0  
0  
0  
0  
0  
0  
0  
0  
0  
0  
0  
0  
0  
0  
1  
0  
0  
1  
0  
1  
0  
0  
0  
0  
1  
0  
0  
1  
1  
1  
1  
0  
0  
0  
0  
1

1  
0  
0  
2  
0  
1  
0  
2  
0  
1  
0  
0  
1  
0  
0  
1  
0  
1  
0  
0  
0  
0  
0  
0  
1  
1  
0  
0  
1  
0  
0  
0  
0  
0  
1  
1  
0  
0  
0  
0  
2  
0  
2  
0  
0  
0  
0  
1  
1  
2  
1  
0  
0

0  
1  
0  
1  
1  
0  
0  
0  
0  
0  
0  
0  
0  
0  
0  
1  
0  
1  
0  
0  
0  
0  
1  
1  
0  
1  
0  
1  
0  
1  
1  
1  
0  
1  
0  
0  
1  
1  
2  
0  
1  
0  
0  
0  
0  
1  
0  
0  
0  
0  
1  
0  
0  
1  
0  
0  
0  
1

0  
1  
0  
0  
0  
0  
0  
1  
0  
0  
0  
0  
2  
0  
0  
1  
0  
0  
0  
0  
0  
0  
3  
1  
2  
2  
0  
2  
0  
0  
0  
0  
0  
1  
0  
3  
2  
1  
2  
0  
1  
0  
1  
0  
0  
0  
0  
0  
0  
2  
0  
0  
0  
0  
0  
0  
1

1  
1  
1  
1  
1  
0  
0  
0  
1  
0  
1  
1  
0  
0  
0  
0  
1  
0  
0  
0  
1  
0  
0  
1  
1  
0  
0  
2  
1  
0  
0  
0  
0  
0  
0  
0  
0  
1  
0  
0  
1  
0  
1  
1  
1  
1  
0  
0  
0  
0  
1  
1  
0  
1

0  
0  
0  
0  
2  
0  
1  
0  
2  
0  
0  
0  
0  
0  
1  
2  
0  
0  
0  
0  
3  
0  
1  
0  
2  
1  
0  
0  
0  
0  
0  
0  
1  
1  
0  
0  
3  
0  
0  
0  
0  
0  
0  
1  
1  
0  
1  
1  
0  
0  
0  
0  
0  
0  
0  
1



1  
0  
0  
1  
1  
0  
0  
1  
1  
1  
1  
1  
0  
0  
0  
0  
1  
1  
0  
0  
0  
1  
0  
1  
1  
1  
1  
0  
0  
2  
0  
0  
2  
1  
1  
1  
1  
0  
0  
2  
0  
0  
1  
0  
0  
1  
1  
1  
0  
2  
1  
2  
0  
0  
0  
0

1  
1  
0  
0  
1  
1  
0  
0  
0  
1  
0  
0  
0  
0  
3  
0  
0  
1  
1  
0  
0  
0  
0  
0  
0  
1  
0  
0  
0  
0  
0  
1  
0  
0  
0  
0  
1  
0  
0  
0  
0  
0  
1  
0  
0  
2  
1  
0  
0  
1  
2  
2  
1  
0  
0  
1  
0  
0  
0  
0  
1  
0  
0  
2  
0

1  
0  
1  
1  
0  
0  
0  
0  
0  
0  
0  
0  
0  
1  
1  
1  
1  
0  
1  
0  
0  
1  
1  
0  
0  
1  
1  
0  
0  
1  
0  
0  
1  
0  
0  
0  
0  
1  
0  
0  
1  
1  
0  
1  
1  
0  
1  
0  
0  
0  
1

0  
1  
1  
0  
0  
1  
0  
0  
0  
0  
1  
0  
1  
0  
0  
0  
0  
0  
0  
3  
0  
0  
0  
0  
2  
0  
0  
0  
0  
0  
0  
0  
0  
1  
0  
0  
1  
0  
0  
0  
0  
1  
0  
3  
0  
0  
0  
0  
0  
0  
0  
0  
1  
1  
0  
0

0  
1  
1  
1  
0  
0  
0  
0  
0  
0  
1  
1  
0  
1  
0  
0  
1  
0  
0  
1  
0  
1  
0  
0  
2  
0  
0  
0  
0  
0  
0  
1  
0  
0  
0  
1  
1  
0  
0  
0  
0  
1  
0  
0  
0  
2  
1  
0  
1  
1  
1  
0  
0  
0  
0

0  
1  
0  
0  
0  
0  
0  
0  
0  
0  
0  
1  
0  
0  
0  
0  
2  
0  
2  
0  
0  
0  
0  
0  
1  
1  
0  
0  
0  
0  
1  
1  
0  
1  
1  
0  
0  
0  
0  
1  
1  
1  
0  
0  
0  
0  
0  
1  
1  
0  
0  
1  
1  
0  
0









0  
1  
0  
0  
1  
1  
1  
0  
0  
0  
0  
0  
0  
0  
0  
0  
0  
0  
0

0  
0  
0  
0  
0  
0  
1  
0  
0  
0  
0  
0  
0  
0  
0  
0  
0  
0  
0

| Representative miRNA | Cumulative Total | Aggregate PCT |
|----------------------|------------------|---------------|
| hsa-miR-1252-5p      | -2.01            | -2.01 N/A     |
| hsa-miR-1252-5p      | -1.65            | -1.65 N/A     |
| hsa-miR-1252-5p      | -1.09            | -1.09 N/A     |
| hsa-miR-1252-5p      | -1.03            | -1.03 N/A     |
| hsa-miR-1252-5p      | -1               | -1 N/A        |
| hsa-miR-1252-5p      | -0.98            | -0.98 N/A     |
| hsa-miR-1252-5p      | -0.93            | -0.93 N/A     |
| hsa-miR-1252-5p      | -0.91            | -0.91 N/A     |
| hsa-miR-1252-5p      | -0.88            | -1.14 N/A     |
| hsa-miR-1252-5p      | -0.85            | -0.85 N/A     |
| hsa-miR-1252-5p      | -0.8             | -0.8 N/A      |
| hsa-miR-1252-5p      | -0.8             | -0.8 N/A      |
| hsa-miR-1252-5p      | -0.79            | -0.79 N/A     |
| hsa-miR-1252-5p      | -0.77            | -0.77 N/A     |
| hsa-miR-1252-5p      | -0.77            | -0.86 N/A     |
| hsa-miR-1252-5p      | -0.74            | -0.74 N/A     |
| hsa-miR-1252-5p      | -0.73            | -0.73 N/A     |
| hsa-miR-1252-5p      | -0.72            | -0.91 N/A     |
| hsa-miR-1252-5p      | -0.71            | -0.71 N/A     |
| hsa-miR-1252-5p      | -0.7             | -0.72 N/A     |
| hsa-miR-1252-5p      | -0.69            | -1.11 N/A     |
| hsa-miR-1252-5p      | -0.69            | -0.69 N/A     |
| hsa-miR-1252-5p      | -0.69            | -0.78 N/A     |
| hsa-miR-1252-5p      | -0.68            | -0.68 N/A     |
| hsa-miR-1252-5p      | -0.68            | -0.94 N/A     |
| hsa-miR-1252-5p      | -0.66            | -0.66 N/A     |
| hsa-miR-1252-5p      | -0.66            | -0.7 N/A      |
| hsa-miR-1252-5p      | -0.65            | -1.43 N/A     |
| hsa-miR-1252-5p      | -0.65            | -0.65 N/A     |
| hsa-miR-1252-5p      | -0.64            | -0.64 N/A     |
| hsa-miR-1252-5p      | -0.64            | -0.64 N/A     |
| hsa-miR-1252-5p      | -0.64            | -0.65 N/A     |
| hsa-miR-1252-5p      | -0.63            | -0.63 N/A     |
| hsa-miR-1252-5p      | -0.63            | -0.63 N/A     |
| hsa-miR-1252-5p      | -0.63            | -0.63 N/A     |
| hsa-miR-1252-5p      | -0.62            | -0.62 N/A     |
| hsa-miR-1252-5p      | -0.62            | -0.62 N/A     |
| hsa-miR-1252-5p      | -0.61            | -0.61 N/A     |
| hsa-miR-1252-5p      | -0.61            | -0.63 N/A     |
| hsa-miR-1252-5p      | -0.6             | -0.64 N/A     |
| hsa-miR-1252-5p      | -0.6             | -0.6 N/A      |
| hsa-miR-1252-5p      | -0.6             | -0.69 N/A     |
| hsa-miR-1252-5p      | -0.59            | -0.59 N/A     |
| hsa-miR-1252-5p      | -0.59            | -0.65 N/A     |
| hsa-miR-1252-5p      | -0.59            | -0.59 N/A     |
| hsa-miR-1252-5p      | -0.59            | -0.59 N/A     |
| hsa-miR-1252-5p      | -0.58            | -0.58 N/A     |
| hsa-miR-1252-5p      | -0.57            | -0.57 N/A     |
| hsa-miR-1252-5p      | -0.57            | -0.58 N/A     |
| hsa-miR-1252-5p      | -0.57            | -0.64 N/A     |
| hsa-miR-1252-5p      | -0.57            | -0.57 N/A     |
| hsa-miR-1252-5p      | -0.57            | -0.61 N/A     |
| hsa-miR-1252-5p      | -0.57            | -0.57 N/A     |

|                 |       |           |
|-----------------|-------|-----------|
| hsa-miR-1252-5p | -0.57 | -0.57 N/A |
| hsa-miR-1252-5p | -0.56 | -0.56 N/A |
| hsa-miR-1252-5p | -0.56 | -0.56 N/A |
| hsa-miR-1252-5p | -0.56 | -0.6 N/A  |
| hsa-miR-1252-5p | -0.56 | -0.56 N/A |
| hsa-miR-1252-5p | -0.55 | -0.55 N/A |
| hsa-miR-1252-5p | -0.55 | -0.55 N/A |
| hsa-miR-1252-5p | -0.55 | -0.55 N/A |
| hsa-miR-1252-5p | -0.54 | -0.58 N/A |
| hsa-miR-1252-5p | -0.54 | -0.54 N/A |
| hsa-miR-1252-5p | -0.54 | -0.59 N/A |
| hsa-miR-1252-5p | -0.54 | -0.54 N/A |
| hsa-miR-1252-5p | -0.53 | -0.53 N/A |
| hsa-miR-1252-5p | -0.53 | -0.56 N/A |
| hsa-miR-1252-5p | -0.52 | -0.52 N/A |
| hsa-miR-1252-5p | -0.51 | -0.52 N/A |
| hsa-miR-1252-5p | -0.51 | -0.51 N/A |
| hsa-miR-1252-5p | -0.5  | -0.52 N/A |
| hsa-miR-1252-5p | -0.5  | -0.5 N/A  |
| hsa-miR-1252-5p | -0.5  | -0.51 N/A |
| hsa-miR-1252-5p | -0.5  | -0.5 N/A  |
| hsa-miR-1252-5p | -0.5  | -0.71 N/A |
| hsa-miR-1252-5p | -0.5  | -0.5 N/A  |
| hsa-miR-1252-5p | -0.5  | -0.51 N/A |
| hsa-miR-1252-5p | -0.5  | -0.5 N/A  |
| hsa-miR-1252-5p | -0.5  | -0.51 N/A |
| hsa-miR-1252-5p | -0.49 | -0.49 N/A |
| hsa-miR-1252-5p | -0.49 | -0.62 N/A |
| hsa-miR-1252-5p | -0.49 | -0.49 N/A |
| hsa-miR-1252-5p | -0.49 | -0.49 N/A |
| hsa-miR-1252-5p | -0.48 | -0.48 N/A |
| hsa-miR-1252-5p | -0.48 | -0.6 N/A  |
| hsa-miR-1252-5p | -0.48 | -0.48 N/A |
| hsa-miR-1252-5p | -0.48 | -0.49 N/A |
| hsa-miR-1252-5p | -0.48 | -0.48 N/A |
| hsa-miR-1252-5p | -0.48 | -0.49 N/A |
| hsa-miR-1252-5p | -0.47 | -0.47 N/A |

|                 |       |           |
|-----------------|-------|-----------|
| hsa-miR-1252-5p | -0.47 | -0.49 N/A |
| hsa-miR-1252-5p | -0.47 | -0.47 N/A |
| hsa-miR-1252-5p | -0.47 | -0.51 N/A |
| hsa-miR-1252-5p | -0.47 | -0.64 N/A |
| hsa-miR-1252-5p | -0.47 | -0.47 N/A |
| hsa-miR-1252-5p | -0.47 | -0.47 N/A |
| hsa-miR-1252-5p | -0.46 | -0.49 N/A |
| hsa-miR-1252-5p | -0.46 | -0.81 N/A |
| hsa-miR-1252-5p | -0.46 | -0.78 N/A |
| hsa-miR-1252-5p | -0.46 | -0.51 N/A |
| hsa-miR-1252-5p | -0.46 | -0.46 N/A |
| hsa-miR-1252-5p | -0.46 | -0.8 N/A  |
| hsa-miR-1252-5p | -0.46 | -0.46 N/A |
| hsa-miR-1252-5p | -0.45 | -0.45 N/A |
| hsa-miR-1252-5p | -0.45 | -0.46 N/A |
| hsa-miR-1252-5p | -0.45 | -0.45 N/A |
| hsa-miR-1252-5p | -0.45 | -0.46 N/A |
| hsa-miR-1252-5p | -0.44 | -0.57 N/A |
| hsa-miR-1252-5p | -0.44 | -0.44 N/A |
| hsa-miR-1252-5p | -0.44 | -0.44 N/A |
| hsa-miR-1252-5p | -0.44 | -0.82 N/A |
| hsa-miR-1252-5p | -0.44 | -0.44 N/A |
| hsa-miR-1252-5p | -0.44 | -0.44 N/A |
| hsa-miR-1252-5p | -0.43 | -0.46 N/A |
| hsa-miR-1252-5p | -0.43 | -0.43 N/A |
| hsa-miR-1252-5p | -0.43 | -0.79 N/A |
| hsa-miR-1252-5p | -0.43 | -0.55 N/A |
| hsa-miR-1252-5p | -0.43 | -0.47 N/A |
| hsa-miR-1252-5p | -0.43 | -0.76 N/A |
| hsa-miR-1252-5p | -0.43 | -0.43 N/A |
| hsa-miR-1252-5p | -0.43 | -0.43 N/A |
| hsa-miR-1252-5p | -0.42 | -0.42 N/A |
| hsa-miR-1252-5p | -0.42 | -0.42 N/A |
| hsa-miR-1252-5p | -0.42 | -0.43 N/A |
| hsa-miR-1252-5p | -0.42 | -0.42 N/A |
| hsa-miR-1252-5p | -0.42 | -0.44 N/A |
| hsa-miR-1252-5p | -0.42 | -0.42 N/A |
| hsa-miR-1252-5p | -0.42 | -0.45 N/A |
| hsa-miR-1252-5p | -0.42 | -0.61 N/A |

|                 |       |           |
|-----------------|-------|-----------|
| hsa-miR-1252-5p | -0.42 | -0.78 N/A |
| hsa-miR-1252-5p | -0.42 | -0.42 N/A |
| hsa-miR-1252-5p | -0.42 | -0.42 N/A |
| hsa-miR-1252-5p | -0.42 | -0.42 N/A |
| hsa-miR-1252-5p | -0.41 | -0.68 N/A |
| hsa-miR-1252-5p | -0.41 | -0.41 N/A |
| hsa-miR-1252-5p | -0.41 | -0.41 N/A |
| hsa-miR-1252-5p | -0.41 | -0.41 N/A |
| hsa-miR-1252-5p | -0.41 | -0.45 N/A |
| hsa-miR-1252-5p | -0.41 | -0.44 N/A |
| hsa-miR-1252-5p | -0.41 | -0.5 N/A  |
| hsa-miR-1252-5p | -0.41 | -0.41 N/A |
| hsa-miR-1252-5p | -0.41 | -0.72 N/A |
| hsa-miR-1252-5p | -0.41 | -0.43 N/A |
| hsa-miR-1252-5p | -0.41 | -0.41 N/A |
| hsa-miR-1252-5p | -0.41 | -0.5 N/A  |
| hsa-miR-1252-5p | -0.41 | -0.42 N/A |
| hsa-miR-1252-5p | -0.41 | -0.41 N/A |
| hsa-miR-1252-5p | -0.41 | -0.41 N/A |
| hsa-miR-1252-5p | -0.4  | -0.46 N/A |
| hsa-miR-1252-5p | -0.4  | -0.4 N/A  |
| hsa-miR-1252-5p | -0.4  | -0.49 N/A |
| hsa-miR-1252-5p | -0.4  | -0.4 N/A  |
| hsa-miR-1252-5p | -0.4  | -0.4 N/A  |
| hsa-miR-1252-5p | -0.4  | -0.4 N/A  |
| hsa-miR-1252-5p | -0.4  | -0.4 N/A  |
| hsa-miR-1252-5p | -0.4  | -0.48 N/A |
| hsa-miR-1252-5p | -0.4  | -0.65 N/A |
| hsa-miR-1252-5p | -0.4  | -0.4 N/A  |
| hsa-miR-1252-5p | -0.4  | -0.61 N/A |
| hsa-miR-1252-5p | -0.4  | -0.55 N/A |
| hsa-miR-1252-5p | -0.4  | -0.41 N/A |
| hsa-miR-1252-5p | -0.4  | -0.4 N/A  |
| hsa-miR-1252-5p | -0.4  | -0.4 N/A  |
| hsa-miR-1252-5p | -0.4  | -0.4 N/A  |
| hsa-miR-1252-5p | -0.4  | -0.41 N/A |
| hsa-miR-1252-5p | -0.4  | -0.4 N/A  |
| hsa-miR-1252-5p | -0.39 | -0.39 N/A |
| hsa-miR-1252-5p | -0.39 | -0.42 N/A |
| hsa-miR-1252-5p | -0.39 | -0.39 N/A |
| hsa-miR-1252-5p | -0.39 | -0.55 N/A |
| hsa-miR-1252-5p | -0.39 | -0.83 N/A |
| hsa-miR-1252-5p | -0.39 | -0.48 N/A |
| hsa-miR-1252-5p | -0.39 | -0.61 N/A |
| hsa-miR-1252-5p | -0.39 | -0.48 N/A |
| hsa-miR-1252-5p | -0.39 | -0.39 N/A |
| hsa-miR-1252-5p | -0.38 | -0.56 N/A |
| hsa-miR-1252-5p | -0.38 | -0.38 N/A |
| hsa-miR-1252-5p | -0.38 | -0.4 N/A  |



|                 |       |           |
|-----------------|-------|-----------|
| hsa-miR-1252-5p | -0.38 | -0.38 N/A |
| hsa-miR-1252-5p | -0.38 | -0.38 N/A |
| hsa-miR-1252-5p | -0.38 | -0.42 N/A |
| hsa-miR-1252-5p | -0.38 | -0.44 N/A |
| hsa-miR-1252-5p | -0.38 | -0.38 N/A |
| hsa-miR-1252-5p | -0.38 | -0.38 N/A |
| hsa-miR-1252-5p | -0.38 | -0.38 N/A |
| hsa-miR-1252-5p | -0.38 | -0.53 N/A |
| hsa-miR-1252-5p | -0.38 | -0.38 N/A |
| hsa-miR-1252-5p | -0.38 | -0.38 N/A |
| hsa-miR-1252-5p | -0.38 | -0.38 N/A |
| hsa-miR-1252-5p | -0.38 | -0.51 N/A |
| hsa-miR-1252-5p | -0.38 | -0.44 N/A |
| hsa-miR-1252-5p | -0.38 | -0.38 N/A |
| hsa-miR-1252-5p | -0.38 | -0.38 N/A |
| hsa-miR-1252-5p | -0.38 | -0.38 N/A |
| hsa-miR-1252-5p | -0.37 | -0.61 N/A |
| hsa-miR-1252-5p | -0.37 | -0.48 N/A |
| hsa-miR-1252-5p | -0.37 | -0.37 N/A |
| hsa-miR-1252-5p | -0.37 | -0.47 N/A |
| hsa-miR-1252-5p | -0.37 | -0.37 N/A |
| hsa-miR-1252-5p | -0.37 | -0.37 N/A |
| hsa-miR-1252-5p | -0.37 | -0.4 N/A  |
| hsa-miR-1252-5p | -0.37 | -0.37 N/A |
| hsa-miR-1252-5p | -0.37 | -0.37 N/A |
| hsa-miR-1252-5p | -0.37 | -0.38 N/A |
| hsa-miR-1252-5p | -0.37 | -0.37 N/A |
| hsa-miR-1252-5p | -0.37 | -0.37 N/A |
| hsa-miR-1252-5p | -0.37 | -0.6 N/A  |
| hsa-miR-1252-5p | -0.37 | -0.37 N/A |
| hsa-miR-1252-5p | -0.37 | -0.37 N/A |
| hsa-miR-1252-5p | -0.36 | -0.61 N/A |
| hsa-miR-1252-5p | -0.36 | -0.41 N/A |
| hsa-miR-1252-5p | -0.36 | -0.59 N/A |
| hsa-miR-1252-5p | -0.36 | -0.46 N/A |
| hsa-miR-1252-5p | -0.36 | -0.36 N/A |
| hsa-miR-1252-5p | -0.36 | -0.52 N/A |
| hsa-miR-1252-5p | -0.36 | -0.42 N/A |
| hsa-miR-1252-5p | -0.36 | -0.36 N/A |
| hsa-miR-1252-5p | -0.36 | -0.37 N/A |
| hsa-miR-1252-5p | -0.36 | -0.45 N/A |
| hsa-miR-1252-5p | -0.36 | -0.36 N/A |
| hsa-miR-1252-5p | -0.36 | -0.36 N/A |
| hsa-miR-1252-5p | -0.36 | -0.51 N/A |
| hsa-miR-1252-5p | -0.36 | -0.36 N/A |
| hsa-miR-1252-5p | -0.36 | -0.36 N/A |
| hsa-miR-1252-5p | -0.36 | -0.36 N/A |
| hsa-miR-1252-5p | -0.36 | -0.47 N/A |
| hsa-miR-1252-5p | -0.36 | -0.36 N/A |
| hsa-miR-1252-5p | -0.36 | -0.36 N/A |

























|                 |       |           |
|-----------------|-------|-----------|
| hsa-miR-1252-5p | -0.22 | -0.22 N/A |
| hsa-miR-1252-5p | -0.22 | -0.41 N/A |
| hsa-miR-1252-5p | -0.22 | -0.24 N/A |
| hsa-miR-1252-5p | -0.22 | -0.22 N/A |
| hsa-miR-1252-5p | -0.22 | -0.22 N/A |
| hsa-miR-1252-5p | -0.22 | -0.28 N/A |
| hsa-miR-1252-5p | -0.22 | -0.36 N/A |
| hsa-miR-1252-5p | -0.22 | -0.22 N/A |
| hsa-miR-1252-5p | -0.22 | -0.23 N/A |
| hsa-miR-1252-5p | -0.22 | -0.29 N/A |
| hsa-miR-1252-5p | -0.22 | -0.33 N/A |
| hsa-miR-1252-5p | -0.22 | -0.22 N/A |
| hsa-miR-1252-5p | -0.22 | -0.29 N/A |
| hsa-miR-1252-5p | -0.22 | -0.22 N/A |
| hsa-miR-1252-5p | -0.22 | -0.22 N/A |
| hsa-miR-1252-5p | -0.22 | -0.22 N/A |
| hsa-miR-1252-5p | -0.22 | -0.35 N/A |
| hsa-miR-1252-5p | -0.22 | -0.4 N/A  |
| hsa-miR-1252-5p | -0.22 | -0.23 N/A |
| hsa-miR-1252-5p | -0.22 | -0.29 N/A |
| hsa-miR-1252-5p | -0.22 | -0.22 N/A |
| hsa-miR-1252-5p | -0.22 | -0.22 N/A |
| hsa-miR-1252-5p | -0.22 | -0.22 N/A |
| hsa-miR-1252-5p | -0.22 | -0.23 N/A |
| hsa-miR-1252-5p | -0.22 | -0.23 N/A |
| hsa-miR-1252-5p | -0.22 | -0.27 N/A |
| hsa-miR-1252-5p | -0.22 | -0.22 N/A |
| hsa-miR-1252-5p | -0.22 | -0.22 N/A |
| hsa-miR-1252-5p | -0.22 | -0.35 N/A |
| hsa-miR-1252-5p | -0.22 | -0.22 N/A |
| hsa-miR-1252-5p | -0.22 | -0.22 N/A |
| hsa-miR-1252-5p | -0.22 | -0.27 N/A |
| hsa-miR-1252-5p | -0.22 | -0.23 N/A |
| hsa-miR-1252-5p | -0.22 | -0.22 N/A |
| hsa-miR-1252-5p | -0.22 | -0.29 N/A |
| hsa-miR-1252-5p | -0.22 | -0.56 N/A |
| hsa-miR-1252-5p | -0.22 | -0.22 N/A |
| hsa-miR-1252-5p | -0.22 | -0.22 N/A |









|                 |      |           |
|-----------------|------|-----------|
| hsa-miR-1252-5p | -0.2 | -0.21 N/A |
| hsa-miR-1252-5p | -0.2 | -0.39 N/A |
| hsa-miR-1252-5p | -0.2 | -0.21 N/A |
| hsa-miR-1252-5p | -0.2 | -0.2 N/A  |
| hsa-miR-1252-5p | -0.2 | -0.2 N/A  |
| hsa-miR-1252-5p | -0.2 | -0.21 N/A |
| hsa-miR-1252-5p | -0.2 | -0.2 N/A  |
| hsa-miR-1252-5p | -0.2 | -0.28 N/A |
| hsa-miR-1252-5p | -0.2 | -0.4 N/A  |
| hsa-miR-1252-5p | -0.2 | -0.2 N/A  |
| hsa-miR-1252-5p | -0.2 | -0.2 N/A  |
| hsa-miR-1252-5p | -0.2 | -0.2 N/A  |
| hsa-miR-1252-5p | -0.2 | -0.23 N/A |
| hsa-miR-1252-5p | -0.2 | -0.3 N/A  |
| hsa-miR-1252-5p | -0.2 | -0.22 N/A |
| hsa-miR-1252-5p | -0.2 | -0.24 N/A |
| hsa-miR-1252-5p | -0.2 | -0.2 N/A  |
| hsa-miR-1252-5p | -0.2 | -0.2 N/A  |
| hsa-miR-1252-5p | -0.2 | -0.2 N/A  |
| hsa-miR-1252-5p | -0.2 | -0.2 N/A  |
| hsa-miR-1252-5p | -0.2 | -0.2 N/A  |
| hsa-miR-1252-5p | -0.2 | -0.2 N/A  |
| hsa-miR-1252-5p | -0.2 | -0.2 N/A  |
| hsa-miR-1252-5p | -0.2 | -0.2 N/A  |
| hsa-miR-1252-5p | -0.2 | -0.2 N/A  |
| hsa-miR-1252-5p | -0.2 | -0.2 N/A  |
| hsa-miR-1252-5p | -0.2 | -0.21 N/A |
| hsa-miR-1252-5p | -0.2 | -0.23 N/A |
| hsa-miR-1252-5p | -0.2 | -0.2 N/A  |
| hsa-miR-1252-5p | -0.2 | -0.3 N/A  |
| hsa-miR-1252-5p | -0.2 | -0.2 N/A  |
| hsa-miR-1252-5p | -0.2 | -0.22 N/A |
| hsa-miR-1252-5p | -0.2 | -0.3 N/A  |
| hsa-miR-1252-5p | -0.2 | -0.21 N/A |
| hsa-miR-1252-5p | -0.2 | -0.62 N/A |
| hsa-miR-1252-5p | -0.2 | -0.25 N/A |
| hsa-miR-1252-5p | -0.2 | -0.2 N/A  |
| hsa-miR-1252-5p | -0.2 | -0.2 N/A  |
| hsa-miR-1252-5p | -0.2 | -0.2 N/A  |
| hsa-miR-1252-5p | -0.2 | -0.2 N/A  |
| hsa-miR-1252-5p | -0.2 | -0.37 N/A |
| hsa-miR-1252-5p | -0.2 | -0.26 N/A |
| hsa-miR-1252-5p | -0.2 | -0.49 N/A |
| hsa-miR-1252-5p | -0.2 | -0.22 N/A |
| hsa-miR-1252-5p | -0.2 | -0.46 N/A |
| hsa-miR-1252-5p | -0.2 | -0.25 N/A |
| hsa-miR-1252-5p | -0.2 | -0.2 N/A  |
| hsa-miR-1252-5p | -0.2 | -0.2 N/A  |
| hsa-miR-1252-5p | -0.2 | -0.2 N/A  |



|                 |       |           |
|-----------------|-------|-----------|
| hsa-miR-1252-5p | -0.19 | -0.19 N/A |
| hsa-miR-1252-5p | -0.19 | -0.19 N/A |
| hsa-miR-1252-5p | -0.19 | -0.45 N/A |
| hsa-miR-1252-5p | -0.19 | -0.2 N/A  |
| hsa-miR-1252-5p | -0.19 | -0.26 N/A |
| hsa-miR-1252-5p | -0.19 | -0.2 N/A  |
| hsa-miR-1252-5p | -0.19 | -0.49 N/A |
| hsa-miR-1252-5p | -0.19 | -0.19 N/A |
| hsa-miR-1252-5p | -0.19 | -0.19 N/A |
| hsa-miR-1252-5p | -0.19 | -0.19 N/A |
| hsa-miR-1252-5p | -0.19 | -0.23 N/A |
| hsa-miR-1252-5p | -0.19 | -0.23 N/A |
| hsa-miR-1252-5p | -0.19 | -0.19 N/A |
| hsa-miR-1252-5p | -0.19 | -0.21 N/A |
| hsa-miR-1252-5p | -0.19 | -0.2 N/A  |
| hsa-miR-1252-5p | -0.19 | -0.21 N/A |
| hsa-miR-1252-5p | -0.19 | -0.22 N/A |
| hsa-miR-1252-5p | -0.19 | -0.19 N/A |
| hsa-miR-1252-5p | -0.19 | -0.19 N/A |
| hsa-miR-1252-5p | -0.19 | -0.19 N/A |
| hsa-miR-1252-5p | -0.19 | -0.22 N/A |
| hsa-miR-1252-5p | -0.19 | -0.19 N/A |
| hsa-miR-1252-5p | -0.19 | -0.19 N/A |
| hsa-miR-1252-5p | -0.19 | -0.19 N/A |
| hsa-miR-1252-5p | -0.19 | -0.23 N/A |
| hsa-miR-1252-5p | -0.19 | -0.19 N/A |
| hsa-miR-1252-5p | -0.19 | -0.21 N/A |
| hsa-miR-1252-5p | -0.19 | -0.19 N/A |
| hsa-miR-1252-5p | -0.19 | -0.3 N/A  |
| hsa-miR-1252-5p | -0.19 | -0.44 N/A |
| hsa-miR-1252-5p | -0.19 | -0.36 N/A |
| hsa-miR-1252-5p | -0.19 | -0.24 N/A |
| hsa-miR-1252-5p | -0.19 | -0.2 N/A  |
| hsa-miR-1252-5p | -0.19 | -0.19 N/A |
| hsa-miR-1252-5p | -0.18 | -0.18 N/A |
| hsa-miR-1252-5p | -0.18 | -0.18 N/A |
| hsa-miR-1252-5p | -0.18 | -0.18 N/A |
| hsa-miR-1252-5p | -0.18 | -0.22 N/A |
| hsa-miR-1252-5p | -0.18 | -0.18 N/A |
| hsa-miR-1252-5p | -0.18 | -0.31 N/A |
| hsa-miR-1252-5p | -0.18 | -0.24 N/A |
| hsa-miR-1252-5p | -0.18 | -0.3 N/A  |
| hsa-miR-1252-5p | -0.18 | -0.19 N/A |
| hsa-miR-1252-5p | -0.18 | -0.18 N/A |
| hsa-miR-1252-5p | -0.18 | -0.18 N/A |
| hsa-miR-1252-5p | -0.18 | -0.18 N/A |

|                 |       |           |
|-----------------|-------|-----------|
| hsa-miR-1252-5p | -0.18 | -0.18 N/A |
| hsa-miR-1252-5p | -0.18 | -0.31 N/A |
| hsa-miR-1252-5p | -0.18 | -0.43 N/A |
| hsa-miR-1252-5p | -0.18 | -0.2 N/A  |
| hsa-miR-1252-5p | -0.18 | -0.25 N/A |
| hsa-miR-1252-5p | -0.18 | -0.32 N/A |
| hsa-miR-1252-5p | -0.18 | -0.18 N/A |
| hsa-miR-1252-5p | -0.18 | -0.18 N/A |
| hsa-miR-1252-5p | -0.18 | -0.3 N/A  |
| hsa-miR-1252-5p | -0.18 | -0.36 N/A |
| hsa-miR-1252-5p | -0.18 | -0.18 N/A |
| hsa-miR-1252-5p | -0.18 | -0.45 N/A |
| hsa-miR-1252-5p | -0.18 | -0.28 N/A |
| hsa-miR-1252-5p | -0.18 | -0.18 N/A |
| hsa-miR-1252-5p | -0.18 | -0.23 N/A |
| hsa-miR-1252-5p | -0.18 | -0.19 N/A |
| hsa-miR-1252-5p | -0.18 | -0.24 N/A |
| hsa-miR-1252-5p | -0.18 | -0.18 N/A |
| hsa-miR-1252-5p | -0.18 | -0.38 N/A |
| hsa-miR-1252-5p | -0.18 | -0.21 N/A |
| hsa-miR-1252-5p | -0.18 | -0.2 N/A  |
| hsa-miR-1252-5p | -0.18 | -0.18 N/A |
| hsa-miR-1252-5p | -0.18 | -0.18 N/A |
| hsa-miR-1252-5p | -0.18 | -0.21 N/A |
| hsa-miR-1252-5p | -0.18 | -0.18 N/A |
| hsa-miR-1252-5p | -0.18 | -0.18 N/A |
| hsa-miR-1252-5p | -0.18 | -0.25 N/A |
| hsa-miR-1252-5p | -0.18 | -0.2 N/A  |
| hsa-miR-1252-5p | -0.18 | -0.18 N/A |
| hsa-miR-1252-5p | -0.18 | -0.18 N/A |
| hsa-miR-1252-5p | -0.18 | -0.21 N/A |
| hsa-miR-1252-5p | -0.18 | -0.18 N/A |
| hsa-miR-1252-5p | -0.18 | -0.18 N/A |
| hsa-miR-1252-5p | -0.18 | -0.2 N/A  |
| hsa-miR-1252-5p | -0.18 | -0.18 N/A |
| hsa-miR-1252-5p | -0.18 | -0.18 N/A |
| hsa-miR-1252-5p | -0.18 | -0.54 N/A |
| hsa-miR-1252-5p | -0.18 | -0.24 N/A |
| hsa-miR-1252-5p | -0.18 | -0.18 N/A |







|                 |       |           |
|-----------------|-------|-----------|
| hsa-miR-1252-5p | -0.16 | -0.16 N/A |
| hsa-miR-1252-5p | -0.16 | -0.26 N/A |
| hsa-miR-1252-5p | -0.16 | -1.08 N/A |
| hsa-miR-1252-5p | -0.16 | -0.27 N/A |
| hsa-miR-1252-5p | -0.16 | -0.16 N/A |
| hsa-miR-1252-5p | -0.16 | -0.17 N/A |
| hsa-miR-1252-5p | -0.16 | -0.17 N/A |
| hsa-miR-1252-5p | -0.16 | -0.16 N/A |
| hsa-miR-1252-5p | -0.16 | -0.22 N/A |
| hsa-miR-1252-5p | -0.16 | -0.16 N/A |
| hsa-miR-1252-5p | -0.16 | -0.24 N/A |
| hsa-miR-1252-5p | -0.16 | -0.27 N/A |
| hsa-miR-1252-5p | -0.16 | -0.22 N/A |
| hsa-miR-1252-5p | -0.16 | -0.16 N/A |
| hsa-miR-1252-5p | -0.16 | -0.16 N/A |
| hsa-miR-1252-5p | -0.16 | -0.35 N/A |
| hsa-miR-1252-5p | -0.16 | -0.18 N/A |
| hsa-miR-1252-5p | -0.16 | -0.16 N/A |
| hsa-miR-1252-5p | -0.16 | -0.17 N/A |
| hsa-miR-1252-5p | -0.16 | -0.2 N/A  |
| hsa-miR-1252-5p | -0.16 | -0.2 N/A  |
| hsa-miR-1252-5p | -0.16 | -0.22 N/A |
| hsa-miR-1252-5p | -0.16 | -0.16 N/A |
| hsa-miR-1252-5p | -0.16 | -0.36 N/A |
| hsa-miR-1252-5p | -0.16 | -0.22 N/A |
| hsa-miR-1252-5p | -0.16 | -0.16 N/A |
| hsa-miR-1252-5p | -0.16 | -0.18 N/A |
| hsa-miR-1252-5p | -0.16 | -0.18 N/A |
| hsa-miR-1252-5p | -0.16 | -0.22 N/A |
| hsa-miR-1252-5p | -0.16 | -0.21 N/A |
| hsa-miR-1252-5p | -0.16 | -0.25 N/A |
| hsa-miR-1252-5p | -0.16 | -0.27 N/A |
| hsa-miR-1252-5p | -0.16 | -0.16 N/A |
| hsa-miR-1252-5p | -0.16 | -0.21 N/A |
| hsa-miR-1252-5p | -0.16 | -0.16 N/A |









|                 |       |           |
|-----------------|-------|-----------|
| hsa-miR-1252-5p | -0.15 | -0.15 N/A |
| hsa-miR-1252-5p | -0.15 | -0.2 N/A  |
| hsa-miR-1252-5p | -0.15 | -0.66 N/A |
| hsa-miR-1252-5p | -0.15 | -0.19 N/A |
| hsa-miR-1252-5p | -0.15 | -0.18 N/A |
| hsa-miR-1252-5p | -0.15 | -0.15 N/A |
| hsa-miR-1252-5p | -0.15 | -0.15 N/A |
| hsa-miR-1252-5p | -0.15 | -0.15 N/A |
| hsa-miR-1252-5p | -0.15 | -0.26 N/A |
| hsa-miR-1252-5p | -0.15 | -0.28 N/A |
| hsa-miR-1252-5p | -0.15 | -0.25 N/A |
| hsa-miR-1252-5p | -0.15 | -0.17 N/A |
| hsa-miR-1252-5p | -0.15 | -0.29 N/A |
| hsa-miR-1252-5p | -0.15 | -0.15 N/A |
| hsa-miR-1252-5p | -0.15 | -0.17 N/A |
| hsa-miR-1252-5p | -0.15 | -0.48 N/A |
| hsa-miR-1252-5p | -0.15 | -0.15 N/A |
| hsa-miR-1252-5p | -0.15 | -0.22 N/A |
| hsa-miR-1252-5p | -0.15 | -0.15 N/A |
| hsa-miR-1252-5p | -0.15 | -0.16 N/A |
| hsa-miR-1252-5p | -0.15 | -0.15 N/A |
| hsa-miR-1252-5p | -0.15 | -0.17 N/A |
| hsa-miR-1252-5p | -0.15 | -0.15 N/A |
| hsa-miR-1252-5p | -0.15 | -0.15 N/A |
| hsa-miR-1252-5p | -0.15 | -0.15 N/A |
| hsa-miR-1252-5p | -0.15 | -0.33 N/A |
| hsa-miR-1252-5p | -0.15 | -0.18 N/A |
| hsa-miR-1252-5p | -0.15 | -0.28 N/A |
| hsa-miR-1252-5p | -0.14 | -0.14 N/A |
| hsa-miR-1252-5p | -0.14 | -0.33 N/A |
| hsa-miR-1252-5p | -0.14 | -0.16 N/A |
| hsa-miR-1252-5p | -0.14 | -0.16 N/A |
| hsa-miR-1252-5p | -0.14 | -0.15 N/A |
| hsa-miR-1252-5p | -0.14 | -0.14 N/A |
| hsa-miR-1252-5p | -0.14 | -0.15 N/A |
| hsa-miR-1252-5p | -0.14 | -0.15 N/A |



|                 |       |           |
|-----------------|-------|-----------|
| hsa-miR-1252-5p | -0.14 | -0.18 N/A |
| hsa-miR-1252-5p | -0.14 | -0.14 N/A |
| hsa-miR-1252-5p | -0.14 | -0.18 N/A |
| hsa-miR-1252-5p | -0.14 | -0.14 N/A |
| hsa-miR-1252-5p | -0.14 | -0.15 N/A |
| hsa-miR-1252-5p | -0.14 | -0.14 N/A |
| hsa-miR-1252-5p | -0.14 | -0.22 N/A |
| hsa-miR-1252-5p | -0.14 | -0.22 N/A |
| hsa-miR-1252-5p | -0.14 | -0.14 N/A |
| hsa-miR-1252-5p | -0.14 | -0.2 N/A  |
| hsa-miR-1252-5p | -0.14 | -0.14 N/A |
| hsa-miR-1252-5p | -0.14 | -0.14 N/A |
| hsa-miR-1252-5p | -0.14 | -0.14 N/A |
| hsa-miR-1252-5p | -0.14 | -0.15 N/A |
| hsa-miR-1252-5p | -0.14 | -0.37 N/A |
| hsa-miR-1252-5p | -0.14 | -0.2 N/A  |
| hsa-miR-1252-5p | -0.14 | -0.56 N/A |
| hsa-miR-1252-5p | -0.14 | -0.15 N/A |
| hsa-miR-1252-5p | -0.14 | -0.23 N/A |
| hsa-miR-1252-5p | -0.14 | -0.3 N/A  |
| hsa-miR-1252-5p | -0.14 | -0.15 N/A |
| hsa-miR-1252-5p | -0.14 | -0.34 N/A |
| hsa-miR-1252-5p | -0.14 | -0.14 N/A |
| hsa-miR-1252-5p | -0.14 | -0.19 N/A |
| hsa-miR-1252-5p | -0.14 | -0.14 N/A |
| hsa-miR-1252-5p | -0.14 | -0.14 N/A |
| hsa-miR-1252-5p | -0.14 | -0.15 N/A |
| hsa-miR-1252-5p | -0.14 | -0.28 N/A |
| hsa-miR-1252-5p | -0.14 | -0.18 N/A |
| hsa-miR-1252-5p | -0.14 | -0.17 N/A |
| hsa-miR-1252-5p | -0.14 | -0.14 N/A |

































|                 |       |           |
|-----------------|-------|-----------|
| hsa-miR-1252-5p | -0.09 | -0.12 N/A |
| hsa-miR-1252-5p | -0.09 | -0.1 N/A  |
| hsa-miR-1252-5p | -0.09 | -0.38 N/A |
| hsa-miR-1252-5p | -0.09 | -0.09 N/A |
| hsa-miR-1252-5p | -0.09 | -0.09 N/A |
| hsa-miR-1252-5p | -0.09 | -0.09 N/A |
| hsa-miR-1252-5p | -0.09 | -0.11 N/A |
| hsa-miR-1252-5p | -0.09 | -0.1 N/A  |
| hsa-miR-1252-5p | -0.09 | -0.35 N/A |
| hsa-miR-1252-5p | -0.09 | -0.1 N/A  |
| hsa-miR-1252-5p | -0.09 | -0.13 N/A |
| hsa-miR-1252-5p | -0.09 | -0.12 N/A |
| hsa-miR-1252-5p | -0.09 | -0.09 N/A |
| hsa-miR-1252-5p | -0.09 | -0.12 N/A |
| hsa-miR-1252-5p | -0.09 | -0.12 N/A |
| hsa-miR-1252-5p | -0.09 | -0.22 N/A |
| hsa-miR-1252-5p | -0.09 | -0.15 N/A |
| hsa-miR-1252-5p | -0.09 | -0.11 N/A |
| hsa-miR-1252-5p | -0.09 | -0.1 N/A  |
| hsa-miR-1252-5p | -0.09 | -0.3 N/A  |
| hsa-miR-1252-5p | -0.09 | -0.11 N/A |
| hsa-miR-1252-5p | -0.09 | -0.15 N/A |
| hsa-miR-1252-5p | -0.09 | -0.1 N/A  |
| hsa-miR-1252-5p | -0.09 | -0.09 N/A |
| hsa-miR-1252-5p | -0.09 | -0.09 N/A |
| hsa-miR-1252-5p | -0.09 | -0.09 N/A |
| hsa-miR-1252-5p | -0.09 | -0.09 N/A |
| hsa-miR-1252-5p | -0.09 | -0.11 N/A |
| hsa-miR-1252-5p | -0.09 | -0.09 N/A |
| hsa-miR-1252-5p | -0.09 | -0.1 N/A  |
| hsa-miR-1252-5p | -0.09 | -0.22 N/A |
| hsa-miR-1252-5p | -0.09 | -0.09 N/A |
| hsa-miR-1252-5p | -0.09 | -0.09 N/A |
| hsa-miR-1252-5p | -0.09 | -0.15 N/A |
| hsa-miR-1252-5p | -0.09 | -0.12 N/A |
| hsa-miR-1252-5p | -0.09 | -0.15 N/A |
| hsa-miR-1252-5p | -0.09 | -0.09 N/A |
| hsa-miR-1252-5p | -0.09 | -0.1 N/A  |
| hsa-miR-1252-5p | -0.09 | -0.12 N/A |
| hsa-miR-1252-5p | -0.09 | -0.15 N/A |
| hsa-miR-1252-5p | -0.09 | -0.09 N/A |
| hsa-miR-1252-5p | -0.09 | -0.18 N/A |

|                 |       |           |
|-----------------|-------|-----------|
| hsa-miR-1252-5p | -0.09 | -0.09 N/A |
| hsa-miR-1252-5p | -0.09 | -0.1 N/A  |
| hsa-miR-1252-5p | -0.09 | -0.27 N/A |
| hsa-miR-1252-5p | -0.09 | -0.09 N/A |
| hsa-miR-1252-5p | -0.09 | -0.1 N/A  |
| hsa-miR-1252-5p | -0.09 | -0.12 N/A |
| hsa-miR-1252-5p | -0.09 | -0.26 N/A |
| hsa-miR-1252-5p | -0.09 | -0.12 N/A |
| hsa-miR-1252-5p | -0.09 | -0.1 N/A  |
| hsa-miR-1252-5p | -0.09 | -0.09 N/A |
| hsa-miR-1252-5p | -0.09 | -0.09 N/A |
| hsa-miR-1252-5p | -0.09 | -0.09 N/A |
| hsa-miR-1252-5p | -0.09 | -0.09 N/A |
| hsa-miR-1252-5p | -0.09 | -0.12 N/A |
| hsa-miR-1252-5p | -0.09 | -0.09 N/A |
| hsa-miR-1252-5p | -0.09 | -0.17 N/A |
| hsa-miR-1252-5p | -0.09 | -0.2 N/A  |
| hsa-miR-1252-5p | -0.09 | -0.11 N/A |
| hsa-miR-1252-5p | -0.09 | -0.43 N/A |
| hsa-miR-1252-5p | -0.09 | -0.2 N/A  |
| hsa-miR-1252-5p | -0.09 | -0.1 N/A  |
| hsa-miR-1252-5p | -0.09 | -0.09 N/A |
| hsa-miR-1252-5p | -0.09 | -0.09 N/A |
| hsa-miR-1252-5p | -0.09 | -0.09 N/A |
| hsa-miR-1252-5p | -0.09 | -0.14 N/A |
| hsa-miR-1252-5p | -0.09 | -0.09 N/A |
| hsa-miR-1252-5p | -0.09 | -0.09 N/A |
| hsa-miR-1252-5p | -0.09 | -0.09 N/A |
| hsa-miR-1252-5p | -0.09 | -0.11 N/A |
| hsa-miR-1252-5p | -0.09 | -0.11 N/A |
| hsa-miR-1252-5p | -0.09 | -0.1 N/A  |
| hsa-miR-1252-5p | -0.09 | -0.2 N/A  |
| hsa-miR-1252-5p | -0.09 | -0.09 N/A |
| hsa-miR-1252-5p | -0.09 | -0.22 N/A |
| hsa-miR-1252-5p | -0.09 | -0.09 N/A |
| hsa-miR-1252-5p | -0.09 | -0.09 N/A |
| hsa-miR-1252-5p | -0.09 | -0.09 N/A |
| hsa-miR-1252-5p | -0.09 | -0.11 N/A |
| hsa-miR-1252-5p | -0.09 | -0.09 N/A |
| hsa-miR-1252-5p | -0.09 | -0.22 N/A |
| hsa-miR-1252-5p | -0.09 | -0.11 N/A |
| hsa-miR-1252-5p | -0.09 | -0.1 N/A  |
| hsa-miR-1252-5p | -0.09 | -0.1 N/A  |
| hsa-miR-1252-5p | -0.09 | -0.22 N/A |
| hsa-miR-1252-5p | -0.09 | -0.29 N/A |
| hsa-miR-1252-5p | -0.09 | -0.3 N/A  |
| hsa-miR-1252-5p | -0.09 | -0.14 N/A |

|                 |       |           |
|-----------------|-------|-----------|
| hsa-miR-1252-5p | -0.09 | -0.13 N/A |
| hsa-miR-1252-5p | -0.09 | -0.09 N/A |
| hsa-miR-1252-5p | -0.09 | -0.1 N/A  |
| hsa-miR-1252-5p | -0.09 | -0.16 N/A |
| hsa-miR-1252-5p | -0.09 | -0.14 N/A |
| hsa-miR-1252-5p | -0.09 | -0.09 N/A |
| hsa-miR-1252-5p | -0.09 | -0.21 N/A |
| hsa-miR-1252-5p | -0.08 | -0.09 N/A |
| hsa-miR-1252-5p | -0.08 | -0.1 N/A  |
| hsa-miR-1252-5p | -0.08 | -0.11 N/A |
| hsa-miR-1252-5p | -0.08 | -0.19 N/A |
| hsa-miR-1252-5p | -0.08 | -0.23 N/A |
| hsa-miR-1252-5p | -0.08 | -0.12 N/A |
| hsa-miR-1252-5p | -0.08 | -0.29 N/A |
| hsa-miR-1252-5p | -0.08 | -0.17 N/A |
| hsa-miR-1252-5p | -0.08 | -0.1 N/A  |
| hsa-miR-1252-5p | -0.08 | -0.09 N/A |
| hsa-miR-1252-5p | -0.08 | -0.09 N/A |
| hsa-miR-1252-5p | -0.08 | -0.16 N/A |
| hsa-miR-1252-5p | -0.08 | -0.14 N/A |
| hsa-miR-1252-5p | -0.08 | -0.08 N/A |
| hsa-miR-1252-5p | -0.08 | -0.09 N/A |
| hsa-miR-1252-5p | -0.08 | -0.08 N/A |
| hsa-miR-1252-5p | -0.08 | -0.12 N/A |
| hsa-miR-1252-5p | -0.08 | -0.08 N/A |
| hsa-miR-1252-5p | -0.08 | -0.09 N/A |
| hsa-miR-1252-5p | -0.08 | -0.08 N/A |
| hsa-miR-1252-5p | -0.08 | -0.13 N/A |
| hsa-miR-1252-5p | -0.08 | -0.08 N/A |
| hsa-miR-1252-5p | -0.08 | -0.08 N/A |
| hsa-miR-1252-5p | -0.08 | -0.08 N/A |
| hsa-miR-1252-5p | -0.08 | -0.18 N/A |
| hsa-miR-1252-5p | -0.08 | -0.12 N/A |
| hsa-miR-1252-5p | -0.08 | -0.09 N/A |
| hsa-miR-1252-5p | -0.08 | -0.08 N/A |
| hsa-miR-1252-5p | -0.08 | -0.28 N/A |
| hsa-miR-1252-5p | -0.08 | -0.13 N/A |
| hsa-miR-1252-5p | -0.08 | -0.15 N/A |

|                 |       |           |
|-----------------|-------|-----------|
| hsa-miR-1252-5p | -0.08 | -0.09 N/A |
| hsa-miR-1252-5p | -0.08 | -0.09 N/A |
| hsa-miR-1252-5p | -0.08 | -0.45 N/A |
| hsa-miR-1252-5p | -0.08 | -0.09 N/A |
| hsa-miR-1252-5p | -0.08 | -0.1 N/A  |
| hsa-miR-1252-5p | -0.08 | -0.08 N/A |
| hsa-miR-1252-5p | -0.08 | -0.08 N/A |
| hsa-miR-1252-5p | -0.08 | -0.2 N/A  |
| hsa-miR-1252-5p | -0.08 | -0.08 N/A |
| hsa-miR-1252-5p | -0.08 | -0.08 N/A |
| hsa-miR-1252-5p | -0.08 | -0.08 N/A |
| hsa-miR-1252-5p | -0.08 | -0.08 N/A |
| hsa-miR-1252-5p | -0.08 | -0.41 N/A |
| hsa-miR-1252-5p | -0.08 | -0.08 N/A |
| hsa-miR-1252-5p | -0.08 | -0.08 N/A |
| hsa-miR-1252-5p | -0.08 | -0.08 N/A |
| hsa-miR-1252-5p | -0.08 | -0.18 N/A |
| hsa-miR-1252-5p | -0.08 | -0.32 N/A |
| hsa-miR-1252-5p | -0.08 | -0.12 N/A |
| hsa-miR-1252-5p | -0.08 | -0.26 N/A |
| hsa-miR-1252-5p | -0.08 | -0.2 N/A  |
| hsa-miR-1252-5p | -0.08 | -0.25 N/A |
| hsa-miR-1252-5p | -0.08 | -0.19 N/A |
| hsa-miR-1252-5p | -0.08 | -0.09 N/A |
| hsa-miR-1252-5p | -0.08 | -0.09 N/A |
| hsa-miR-1252-5p | -0.08 | -0.08 N/A |
| hsa-miR-1252-5p | -0.08 | -0.11 N/A |
| hsa-miR-1252-5p | -0.08 | -0.08 N/A |
| hsa-miR-1252-5p | -0.08 | -0.08 N/A |
| hsa-miR-1252-5p | -0.08 | -0.08 N/A |
| hsa-miR-1252-5p | -0.08 | -0.12 N/A |
| hsa-miR-1252-5p | -0.08 | -0.27 N/A |
| hsa-miR-1252-5p | -0.08 | -0.08 N/A |
| hsa-miR-1252-5p | -0.08 | -0.21 N/A |
| hsa-miR-1252-5p | -0.08 | -0.42 N/A |
| hsa-miR-1252-5p | -0.08 | -0.08 N/A |
| hsa-miR-1252-5p | -0.08 | -0.2 N/A  |
| hsa-miR-1252-5p | -0.08 | -0.08 N/A |
| hsa-miR-1252-5p | -0.08 | -0.14 N/A |
| hsa-miR-1252-5p | -0.08 | -0.08 N/A |
| hsa-miR-1252-5p | -0.08 | -0.22 N/A |
| hsa-miR-1252-5p | -0.08 | -0.08 N/A |
| hsa-miR-1252-5p | -0.08 | -0.08 N/A |
| hsa-miR-1252-5p | -0.08 | -0.09 N/A |
| hsa-miR-1252-5p | -0.08 | -0.13 N/A |

















|                 |       |           |
|-----------------|-------|-----------|
| hsa-miR-1252-5p | -0.06 | -0.06 N/A |
| hsa-miR-1252-5p | -0.06 | -0.23 N/A |
| hsa-miR-1252-5p | -0.06 | -0.06 N/A |
| hsa-miR-1252-5p | -0.06 | -0.06 N/A |
| hsa-miR-1252-5p | -0.06 | -0.06 N/A |
| hsa-miR-1252-5p | -0.06 | -0.09 N/A |
| hsa-miR-1252-5p | -0.06 | -0.07 N/A |
| hsa-miR-1252-5p | -0.06 | -0.16 N/A |
| hsa-miR-1252-5p | -0.06 | -0.13 N/A |
| hsa-miR-1252-5p | -0.06 | -0.33 N/A |
| hsa-miR-1252-5p | -0.06 | -0.12 N/A |
| hsa-miR-1252-5p | -0.06 | -0.07 N/A |
| hsa-miR-1252-5p | -0.06 | -0.25 N/A |
| hsa-miR-1252-5p | -0.06 | -0.1 N/A  |
| hsa-miR-1252-5p | -0.06 | -0.18 N/A |
| hsa-miR-1252-5p | -0.06 | -0.25 N/A |
| hsa-miR-1252-5p | -0.06 | -0.36 N/A |
| hsa-miR-1252-5p | -0.06 | -0.12 N/A |
| hsa-miR-1252-5p | -0.06 | -0.13 N/A |
| hsa-miR-1252-5p | -0.06 | -0.08 N/A |
| hsa-miR-1252-5p | -0.06 | -0.17 N/A |
| hsa-miR-1252-5p | -0.06 | -0.06 N/A |
| hsa-miR-1252-5p | -0.06 | -0.12 N/A |
| hsa-miR-1252-5p | -0.06 | -0.21 N/A |
| hsa-miR-1252-5p | -0.06 | -0.08 N/A |
| hsa-miR-1252-5p | -0.06 | -0.06 N/A |
| hsa-miR-1252-5p | -0.06 | -0.14 N/A |
| hsa-miR-1252-5p | -0.06 | -0.15 N/A |
| hsa-miR-1252-5p | -0.06 | -0.07 N/A |
| hsa-miR-1252-5p | -0.06 | -0.15 N/A |
| hsa-miR-1252-5p | -0.06 | -0.26 N/A |
| hsa-miR-1252-5p | -0.06 | -0.17 N/A |
| hsa-miR-1252-5p | -0.06 | -0.11 N/A |
| hsa-miR-1252-5p | -0.06 | -0.21 N/A |
| hsa-miR-1252-5p | -0.06 | -0.16 N/A |
| hsa-miR-1252-5p | -0.06 | -0.06 N/A |
| hsa-miR-1252-5p | -0.06 | -0.16 N/A |
| hsa-miR-1252-5p | -0.06 | -0.17 N/A |
| hsa-miR-1252-5p | -0.06 | -0.06 N/A |
| hsa-miR-1252-5p | -0.06 | -0.06 N/A |



|                 |       |           |
|-----------------|-------|-----------|
| hsa-miR-1252-5p | -0.06 | -0.06 N/A |
| hsa-miR-1252-5p | -0.06 | -0.06 N/A |
| hsa-miR-1252-5p | -0.06 | -0.06 N/A |
| hsa-miR-1252-5p | -0.06 | -0.19 N/A |
| hsa-miR-1252-5p | -0.06 | -0.06 N/A |
| hsa-miR-1252-5p | -0.06 | -0.15 N/A |
| hsa-miR-1252-5p | -0.06 | -0.34 N/A |
| hsa-miR-1252-5p | -0.06 | -0.09 N/A |
| hsa-miR-1252-5p | -0.06 | -0.07 N/A |
| hsa-miR-1252-5p | -0.06 | -0.13 N/A |
| hsa-miR-1252-5p | -0.06 | -0.13 N/A |
| hsa-miR-1252-5p | -0.06 | -0.14 N/A |
| hsa-miR-1252-5p | -0.06 | -0.08 N/A |
| hsa-miR-1252-5p | -0.06 | -0.06 N/A |
| hsa-miR-1252-5p | -0.06 | -0.25 N/A |
| hsa-miR-1252-5p | -0.06 | -0.12 N/A |
| hsa-miR-1252-5p | -0.06 | -0.06 N/A |
| hsa-miR-1252-5p | -0.06 | -0.17 N/A |
| hsa-miR-1252-5p | -0.06 | -0.06 N/A |
| hsa-miR-1252-5p | -0.06 | -0.19 N/A |
| hsa-miR-1252-5p | -0.06 | -0.06 N/A |
| hsa-miR-1252-5p | -0.06 | -0.14 N/A |
| hsa-miR-1252-5p | -0.06 | -0.14 N/A |
| hsa-miR-1252-5p | -0.06 | -0.07 N/A |
| hsa-miR-1252-5p | -0.06 | -0.09 N/A |
| hsa-miR-1252-5p | -0.06 | -0.14 N/A |
| hsa-miR-1252-5p | -0.06 | -0.21 N/A |
| hsa-miR-1252-5p | -0.06 | -0.06 N/A |
| hsa-miR-1252-5p | -0.06 | -0.06 N/A |
| hsa-miR-1252-5p | -0.06 | -0.09 N/A |
| hsa-miR-1252-5p | -0.06 | -0.2 N/A  |
| hsa-miR-1252-5p | -0.06 | -0.06 N/A |
| hsa-miR-1252-5p | -0.06 | -0.08 N/A |
| hsa-miR-1252-5p | -0.06 | -0.13 N/A |
| hsa-miR-1252-5p | -0.06 | -0.23 N/A |
| hsa-miR-1252-5p | -0.06 | -0.06 N/A |
| hsa-miR-1252-5p | -0.06 | -0.18 N/A |
| hsa-miR-1252-5p | -0.06 | -0.06 N/A |
| hsa-miR-1252-5p | -0.06 | -0.29 N/A |
| hsa-miR-1252-5p | -0.06 | -0.13 N/A |
| hsa-miR-1252-5p | -0.06 | -0.13 N/A |
| hsa-miR-1252-5p | -0.06 | -0.06 N/A |
| hsa-miR-1252-5p | -0.06 | -0.23 N/A |
| hsa-miR-1252-5p | -0.06 | -0.06 N/A |
| hsa-miR-1252-5p | -0.06 | -0.1 N/A  |

|                 |       |           |
|-----------------|-------|-----------|
| hsa-miR-1252-5p | -0.06 | -0.06 N/A |
| hsa-miR-1252-5p | -0.06 | -0.29 N/A |
| hsa-miR-1252-5p | -0.06 | -0.21 N/A |
| hsa-miR-1252-5p | -0.06 | -0.07 N/A |
| hsa-miR-1252-5p | -0.06 | -0.21 N/A |
| hsa-miR-1252-5p | -0.06 | -0.09 N/A |
| hsa-miR-1252-5p | -0.06 | -0.19 N/A |
| hsa-miR-1252-5p | -0.06 | -0.07 N/A |
| hsa-miR-1252-5p | -0.06 | -0.06 N/A |
| hsa-miR-1252-5p | -0.06 | -0.46 N/A |
| hsa-miR-1252-5p | -0.06 | -0.07 N/A |
| hsa-miR-1252-5p | -0.06 | -0.06 N/A |
| hsa-miR-1252-5p | -0.06 | -0.06 N/A |
| hsa-miR-1252-5p | -0.06 | -0.09 N/A |
| hsa-miR-1252-5p | -0.06 | -0.31 N/A |
| hsa-miR-1252-5p | -0.06 | -0.16 N/A |
| hsa-miR-1252-5p | -0.06 | -0.1 N/A  |
| hsa-miR-1252-5p | -0.06 | -0.12 N/A |
| hsa-miR-1252-5p | -0.06 | -0.09 N/A |
| hsa-miR-1252-5p | -0.06 | -0.06 N/A |
| hsa-miR-1252-5p | -0.06 | -0.14 N/A |
| hsa-miR-1252-5p | -0.06 | -0.07 N/A |
| hsa-miR-1252-5p | -0.06 | -0.06 N/A |
| hsa-miR-1252-5p | -0.06 | -0.06 N/A |
| hsa-miR-1252-5p | -0.06 | -0.06 N/A |
| hsa-miR-1252-5p | -0.06 | -0.56 N/A |
| hsa-miR-1252-5p | -0.06 | -0.06 N/A |
| hsa-miR-1252-5p | -0.06 | -0.23 N/A |
| hsa-miR-1252-5p | -0.06 | -0.06 N/A |
| hsa-miR-1252-5p | -0.06 | -0.07 N/A |
| hsa-miR-1252-5p | -0.06 | -0.06 N/A |
| hsa-miR-1252-5p | -0.06 | -0.14 N/A |
| hsa-miR-1252-5p | -0.06 | -0.15 N/A |
| hsa-miR-1252-5p | -0.06 | -0.09 N/A |
| hsa-miR-1252-5p | -0.06 | -0.06 N/A |
| hsa-miR-1252-5p | -0.06 | -0.06 N/A |
| hsa-miR-1252-5p | -0.06 | -0.06 N/A |
| hsa-miR-1252-5p | -0.06 | -0.07 N/A |
| hsa-miR-1252-5p | -0.06 | -0.23 N/A |
| hsa-miR-1252-5p | -0.06 | -0.07 N/A |
| hsa-miR-1252-5p | -0.06 | -0.07 N/A |
| hsa-miR-1252-5p | -0.06 | -0.06 N/A |
| hsa-miR-1252-5p | -0.06 | -0.15 N/A |
| hsa-miR-1252-5p | -0.06 | -0.36 N/A |
| hsa-miR-1252-5p | -0.06 | -0.06 N/A |
| hsa-miR-1252-5p | -0.06 | -0.11 N/A |

|                 |       |           |
|-----------------|-------|-----------|
| hsa-miR-1252-5p | -0.06 | -0.06 N/A |
| hsa-miR-1252-5p | -0.05 | -0.06 N/A |
| hsa-miR-1252-5p | -0.05 | -0.11 N/A |
| hsa-miR-1252-5p | -0.05 | -0.2 N/A  |
| hsa-miR-1252-5p | -0.05 | -0.19 N/A |
| hsa-miR-1252-5p | -0.05 | -0.11 N/A |
| hsa-miR-1252-5p | -0.05 | -0.07 N/A |
| hsa-miR-1252-5p | -0.05 | -0.16 N/A |
| hsa-miR-1252-5p | -0.05 | -0.07 N/A |
| hsa-miR-1252-5p | -0.05 | -0.32 N/A |
| hsa-miR-1252-5p | -0.05 | -0.17 N/A |
| hsa-miR-1252-5p | -0.05 | -0.07 N/A |
| hsa-miR-1252-5p | -0.05 | -0.13 N/A |
| hsa-miR-1252-5p | -0.05 | -0.06 N/A |
| hsa-miR-1252-5p | -0.05 | -0.07 N/A |
| hsa-miR-1252-5p | -0.05 | -0.05 N/A |
| hsa-miR-1252-5p | -0.05 | -0.05 N/A |
| hsa-miR-1252-5p | -0.05 | -0.08 N/A |
| hsa-miR-1252-5p | -0.05 | -0.14 N/A |
| hsa-miR-1252-5p | -0.05 | -0.67 N/A |
| hsa-miR-1252-5p | -0.05 | -0.32 N/A |
| hsa-miR-1252-5p | -0.05 | -0.06 N/A |
| hsa-miR-1252-5p | -0.05 | -0.07 N/A |
| hsa-miR-1252-5p | -0.05 | -0.06 N/A |
| hsa-miR-1252-5p | -0.05 | -0.06 N/A |
| hsa-miR-1252-5p | -0.05 | -0.06 N/A |
| hsa-miR-1252-5p | -0.05 | -0.1 N/A  |
| hsa-miR-1252-5p | -0.05 | -0.35 N/A |
| hsa-miR-1252-5p | -0.05 | -0.06 N/A |
| hsa-miR-1252-5p | -0.05 | -0.05 N/A |
| hsa-miR-1252-5p | -0.05 | -0.05 N/A |
| hsa-miR-1252-5p | -0.05 | -0.05 N/A |
| hsa-miR-1252-5p | -0.05 | -0.06 N/A |
| hsa-miR-1252-5p | -0.05 | -0.06 N/A |
| hsa-miR-1252-5p | -0.05 | -0.27 N/A |
| hsa-miR-1252-5p | -0.05 | -0.17 N/A |
| hsa-miR-1252-5p | -0.05 | -0.2 N/A  |
| hsa-miR-1252-5p | -0.05 | -0.12 N/A |
| hsa-miR-1252-5p | -0.05 | -0.09 N/A |
| hsa-miR-1252-5p | -0.05 | -0.05 N/A |
| hsa-miR-1252-5p | -0.05 | -0.06 N/A |
| hsa-miR-1252-5p | -0.05 | -0.09 N/A |
| hsa-miR-1252-5p | -0.05 | -0.14 N/A |
| hsa-miR-1252-5p | -0.05 | -0.18 N/A |
| hsa-miR-1252-5p | -0.05 | -0.34 N/A |
| hsa-miR-1252-5p | -0.05 | -0.12 N/A |
| hsa-miR-1252-5p | -0.05 | -0.07 N/A |

|                 |       |           |
|-----------------|-------|-----------|
| hsa-miR-1252-5p | -0.05 | -0.05 N/A |
| hsa-miR-1252-5p | -0.05 | -0.17 N/A |
| hsa-miR-1252-5p | -0.05 | -0.05 N/A |
| hsa-miR-1252-5p | -0.05 | -0.07 N/A |
| hsa-miR-1252-5p | -0.05 | -0.07 N/A |
| hsa-miR-1252-5p | -0.05 | -0.24 N/A |
| hsa-miR-1252-5p | -0.05 | -0.06 N/A |
| hsa-miR-1252-5p | -0.05 | -0.2 N/A  |
| hsa-miR-1252-5p | -0.05 | -0.16 N/A |
| hsa-miR-1252-5p | -0.05 | -0.31 N/A |
| hsa-miR-1252-5p | -0.05 | -0.1 N/A  |
| hsa-miR-1252-5p | -0.05 | -0.22 N/A |
| hsa-miR-1252-5p | -0.05 | -0.1 N/A  |
| hsa-miR-1252-5p | -0.05 | -0.05 N/A |
| hsa-miR-1252-5p | -0.05 | -0.05 N/A |
| hsa-miR-1252-5p | -0.05 | -0.05 N/A |
| hsa-miR-1252-5p | -0.05 | -0.23 N/A |
| hsa-miR-1252-5p | -0.05 | -0.05 N/A |
| hsa-miR-1252-5p | -0.05 | -0.24 N/A |
| hsa-miR-1252-5p | -0.05 | -0.06 N/A |
| hsa-miR-1252-5p | -0.05 | -0.05 N/A |
| hsa-miR-1252-5p | -0.05 | -0.18 N/A |
| hsa-miR-1252-5p | -0.05 | -0.07 N/A |
| hsa-miR-1252-5p | -0.05 | -0.21 N/A |
| hsa-miR-1252-5p | -0.05 | -0.21 N/A |
| hsa-miR-1252-5p | -0.05 | -0.06 N/A |
| hsa-miR-1252-5p | -0.05 | -0.05 N/A |
| hsa-miR-1252-5p | -0.05 | -0.13 N/A |
| hsa-miR-1252-5p | -0.05 | -0.06 N/A |
| hsa-miR-1252-5p | -0.05 | -0.05 N/A |
| hsa-miR-1252-5p | -0.05 | -0.54 N/A |
| hsa-miR-1252-5p | -0.05 | -0.08 N/A |
| hsa-miR-1252-5p | -0.05 | -0.18 N/A |
| hsa-miR-1252-5p | -0.05 | -0.06 N/A |
| hsa-miR-1252-5p | -0.05 | -0.05 N/A |
| hsa-miR-1252-5p | -0.05 | -0.25 N/A |
| hsa-miR-1252-5p | -0.05 | -0.22 N/A |
| hsa-miR-1252-5p | -0.05 | -0.15 N/A |
| hsa-miR-1252-5p | -0.05 | -0.09 N/A |
| hsa-miR-1252-5p | -0.05 | -0.11 N/A |
| hsa-miR-1252-5p | -0.05 | -0.17 N/A |
| hsa-miR-1252-5p | -0.05 | -0.23 N/A |
| hsa-miR-1252-5p | -0.05 | -0.05 N/A |
| hsa-miR-1252-5p | -0.05 | -0.05 N/A |
| hsa-miR-1252-5p | -0.05 | -0.05 N/A |

|                 |       |           |
|-----------------|-------|-----------|
| hsa-miR-1252-5p | -0.05 | -0.05 N/A |
| hsa-miR-1252-5p | -0.05 | -0.21 N/A |
| hsa-miR-1252-5p | -0.05 | -0.28 N/A |
| hsa-miR-1252-5p | -0.05 | -0.07 N/A |
| hsa-miR-1252-5p | -0.05 | -0.14 N/A |
| hsa-miR-1252-5p | -0.05 | -0.15 N/A |
| hsa-miR-1252-5p | -0.05 | -0.21 N/A |
| hsa-miR-1252-5p | -0.05 | -0.12 N/A |
| hsa-miR-1252-5p | -0.05 | -0.06 N/A |
| hsa-miR-1252-5p | -0.05 | -0.05 N/A |
| hsa-miR-1252-5p | -0.05 | -0.17 N/A |
| hsa-miR-1252-5p | -0.05 | -0.05 N/A |
| hsa-miR-1252-5p | -0.05 | -0.25 N/A |
| hsa-miR-1252-5p | -0.05 | -0.24 N/A |
| hsa-miR-1252-5p | -0.05 | -0.09 N/A |
| hsa-miR-1252-5p | -0.05 | -0.11 N/A |
| hsa-miR-1252-5p | -0.05 | -0.1 N/A  |
| hsa-miR-1252-5p | -0.05 | -0.05 N/A |
| hsa-miR-1252-5p | -0.05 | -0.38 N/A |
| hsa-miR-1252-5p | -0.05 | -0.1 N/A  |
| hsa-miR-1252-5p | -0.05 | -0.05 N/A |
| hsa-miR-1252-5p | -0.05 | -0.07 N/A |
| hsa-miR-1252-5p | -0.05 | -0.07 N/A |
| hsa-miR-1252-5p | -0.05 | -0.05 N/A |
| hsa-miR-1252-5p | -0.05 | -0.18 N/A |
| hsa-miR-1252-5p | -0.05 | -0.05 N/A |
| hsa-miR-1252-5p | -0.05 | -0.12 N/A |
| hsa-miR-1252-5p | -0.05 | -0.14 N/A |

|                 |       |           |
|-----------------|-------|-----------|
| hsa-miR-1252-5p | -0.05 | -0.95 N/A |
| hsa-miR-1252-5p | -0.05 | -0.1 N/A  |
| hsa-miR-1252-5p | -0.05 | -0.34 N/A |
| hsa-miR-1252-5p | -0.05 | -0.14 N/A |
| hsa-miR-1252-5p | -0.05 | -0.05 N/A |
| hsa-miR-1252-5p | -0.05 | -0.05 N/A |
| hsa-miR-1252-5p | -0.05 | -0.05 N/A |
| hsa-miR-1252-5p | -0.05 | -0.09 N/A |
| hsa-miR-1252-5p | -0.05 | -0.06 N/A |
| hsa-miR-1252-5p | -0.05 | -0.09 N/A |
| hsa-miR-1252-5p | -0.05 | -0.31 N/A |
| hsa-miR-1252-5p | -0.05 | -0.13 N/A |
| hsa-miR-1252-5p | -0.05 | -0.08 N/A |
| hsa-miR-1252-5p | -0.05 | -0.07 N/A |
| hsa-miR-1252-5p | -0.05 | -0.05 N/A |
| hsa-miR-1252-5p | -0.05 | -0.07 N/A |
| hsa-miR-1252-5p | -0.05 | -0.05 N/A |
| hsa-miR-1252-5p | -0.05 | -0.2 N/A  |
| hsa-miR-1252-5p | -0.05 | -0.14 N/A |
| hsa-miR-1252-5p | -0.05 | -0.06 N/A |
| hsa-miR-1252-5p | -0.05 | -0.08 N/A |
| hsa-miR-1252-5p | -0.05 | -0.12 N/A |
| hsa-miR-1252-5p | -0.05 | -0.27 N/A |
| hsa-miR-1252-5p | -0.05 | -0.13 N/A |
| hsa-miR-1252-5p | -0.05 | -0.13 N/A |
| hsa-miR-1252-5p | -0.05 | -0.17 N/A |
| hsa-miR-1252-5p | -0.05 | -0.08 N/A |
| hsa-miR-1252-5p | -0.05 | -0.36 N/A |
| hsa-miR-1252-5p | -0.05 | -0.05 N/A |
| hsa-miR-1252-5p | -0.05 | -0.19 N/A |
| hsa-miR-1252-5p | -0.05 | -0.05 N/A |
| hsa-miR-1252-5p | -0.05 | -0.05 N/A |
| hsa-miR-1252-5p | -0.05 | -0.12 N/A |
| hsa-miR-1252-5p | -0.05 | -0.1 N/A  |
| hsa-miR-1252-5p | -0.05 | -0.06 N/A |
| hsa-miR-1252-5p | -0.05 | -0.12 N/A |
| hsa-miR-1252-5p | -0.05 | -0.05 N/A |
| hsa-miR-1252-5p | -0.05 | -0.07 N/A |
| hsa-miR-1252-5p | -0.05 | -0.22 N/A |
| hsa-miR-1252-5p | -0.05 | -0.09 N/A |

|                 |       |           |
|-----------------|-------|-----------|
| hsa-miR-1252-5p | -0.05 | -0.09 N/A |
| hsa-miR-1252-5p | -0.05 | -0.05 N/A |
| hsa-miR-1252-5p | -0.05 | -0.27 N/A |
| hsa-miR-1252-5p | -0.05 | -0.05 N/A |
| hsa-miR-1252-5p | -0.05 | -0.13 N/A |
| hsa-miR-1252-5p | -0.04 | -0.04 N/A |
| hsa-miR-1252-5p | -0.04 | -0.04 N/A |
| hsa-miR-1252-5p | -0.04 | -0.04 N/A |
| hsa-miR-1252-5p | -0.04 | -0.35 N/A |
| hsa-miR-1252-5p | -0.04 | -0.04 N/A |
| hsa-miR-1252-5p | -0.04 | -0.04 N/A |
| hsa-miR-1252-5p | -0.04 | -0.06 N/A |
| hsa-miR-1252-5p | -0.04 | -0.24 N/A |
| hsa-miR-1252-5p | -0.04 | -0.24 N/A |
| hsa-miR-1252-5p | -0.04 | -0.06 N/A |
| hsa-miR-1252-5p | -0.04 | -0.14 N/A |
| hsa-miR-1252-5p | -0.04 | -0.09 N/A |
| hsa-miR-1252-5p | -0.04 | -0.13 N/A |
| hsa-miR-1252-5p | -0.04 | -0.19 N/A |
| hsa-miR-1252-5p | -0.04 | -0.42 N/A |
| hsa-miR-1252-5p | -0.04 | -0.05 N/A |
| hsa-miR-1252-5p | -0.04 | -0.1 N/A  |
| hsa-miR-1252-5p | -0.04 | -0.05 N/A |
| hsa-miR-1252-5p | -0.04 | -0.04 N/A |
| hsa-miR-1252-5p | -0.04 | -0.04 N/A |
| hsa-miR-1252-5p | -0.04 | -0.17 N/A |
| hsa-miR-1252-5p | -0.04 | -0.04 N/A |
| hsa-miR-1252-5p | -0.04 | -0.08 N/A |
| hsa-miR-1252-5p | -0.04 | -0.04 N/A |
| hsa-miR-1252-5p | -0.04 | -0.04 N/A |
| hsa-miR-1252-5p | -0.04 | -0.1 N/A  |
| hsa-miR-1252-5p | -0.04 | -0.05 N/A |
| hsa-miR-1252-5p | -0.04 | -0.06 N/A |
| hsa-miR-1252-5p | -0.04 | -0.06 N/A |
| hsa-miR-1252-5p | -0.04 | -0.04 N/A |
| hsa-miR-1252-5p | -0.04 | -0.06 N/A |
| hsa-miR-1252-5p | -0.04 | -0.29 N/A |
| hsa-miR-1252-5p | -0.04 | -0.04 N/A |
| hsa-miR-1252-5p | -0.04 | -0.06 N/A |
| hsa-miR-1252-5p | -0.04 | -0.16 N/A |
| hsa-miR-1252-5p | -0.04 | -0.08 N/A |
| hsa-miR-1252-5p | -0.04 | -0.06 N/A |
| hsa-miR-1252-5p | -0.04 | -0.15 N/A |
| hsa-miR-1252-5p | -0.04 | -0.12 N/A |
| hsa-miR-1252-5p | -0.04 | -0.04 N/A |
| hsa-miR-1252-5p | -0.04 | -0.04 N/A |
| hsa-miR-1252-5p | -0.04 | -0.14 N/A |
| hsa-miR-1252-5p | -0.04 | -0.04 N/A |
| hsa-miR-1252-5p | -0.04 | -0.04 N/A |
| hsa-miR-1252-5p | -0.04 | -0.07 N/A |

|                 |       |           |
|-----------------|-------|-----------|
| hsa-miR-1252-5p | -0.04 | -0.04 N/A |
| hsa-miR-1252-5p | -0.04 | -0.14 N/A |
| hsa-miR-1252-5p | -0.04 | -0.04 N/A |
| hsa-miR-1252-5p | -0.04 | -0.06 N/A |
| hsa-miR-1252-5p | -0.04 | -0.04 N/A |
| hsa-miR-1252-5p | -0.04 | -0.04 N/A |
| hsa-miR-1252-5p | -0.04 | -0.04 N/A |
| hsa-miR-1252-5p | -0.04 | -0.05 N/A |
| hsa-miR-1252-5p | -0.04 | -0.17 N/A |
| hsa-miR-1252-5p | -0.04 | -0.15 N/A |
| hsa-miR-1252-5p | -0.04 | -0.21 N/A |
| hsa-miR-1252-5p | -0.04 | -0.27 N/A |
| hsa-miR-1252-5p | -0.04 | -0.04 N/A |
| hsa-miR-1252-5p | -0.04 | -0.2 N/A  |
| hsa-miR-1252-5p | -0.04 | -0.05 N/A |
| hsa-miR-1252-5p | -0.04 | -0.09 N/A |
| hsa-miR-1252-5p | -0.04 | -0.17 N/A |
| hsa-miR-1252-5p | -0.04 | -0.1 N/A  |
| hsa-miR-1252-5p | -0.04 | -0.04 N/A |
| hsa-miR-1252-5p | -0.04 | -0.04 N/A |
| hsa-miR-1252-5p | -0.04 | -0.05 N/A |
| hsa-miR-1252-5p | -0.04 | -0.04 N/A |
| hsa-miR-1252-5p | -0.04 | -0.36 N/A |
| hsa-miR-1252-5p | -0.04 | -0.05 N/A |
| hsa-miR-1252-5p | -0.04 | -0.47 N/A |
| hsa-miR-1252-5p | -0.04 | -0.05 N/A |
| hsa-miR-1252-5p | -0.04 | -0.2 N/A  |
| hsa-miR-1252-5p | -0.04 | -0.35 N/A |
| hsa-miR-1252-5p | -0.04 | -0.06 N/A |
| hsa-miR-1252-5p | -0.04 | -0.44 N/A |
| hsa-miR-1252-5p | -0.04 | -0.13 N/A |
| hsa-miR-1252-5p | -0.04 | -0.55 N/A |
| hsa-miR-1252-5p | -0.04 | -0.2 N/A  |
| hsa-miR-1252-5p | -0.04 | -0.05 N/A |
| hsa-miR-1252-5p | -0.04 | -0.04 N/A |
| hsa-miR-1252-5p | -0.04 | -0.3 N/A  |
| hsa-miR-1252-5p | -0.04 | -0.04 N/A |
| hsa-miR-1252-5p | -0.04 | -0.04 N/A |
| hsa-miR-1252-5p | -0.04 | -0.26 N/A |
| hsa-miR-1252-5p | -0.04 | -0.08 N/A |
| hsa-miR-1252-5p | -0.04 | -0.08 N/A |
| hsa-miR-1252-5p | -0.04 | -0.15 N/A |
| hsa-miR-1252-5p | -0.04 | -0.13 N/A |
| hsa-miR-1252-5p | -0.04 | -0.1 N/A  |
| hsa-miR-1252-5p | -0.04 | -0.07 N/A |
| hsa-miR-1252-5p | -0.04 | -0.19 N/A |
| hsa-miR-1252-5p | -0.04 | -0.05 N/A |





|                 |       |           |
|-----------------|-------|-----------|
| hsa-miR-1252-5p | -0.04 | -0.05 N/A |
| hsa-miR-1252-5p | -0.04 | -0.06 N/A |
| hsa-miR-1252-5p | -0.04 | -0.23 N/A |
| hsa-miR-1252-5p | -0.04 | -0.31 N/A |
| hsa-miR-1252-5p | -0.04 | -0.18 N/A |
| hsa-miR-1252-5p | -0.04 | -0.23 N/A |
| hsa-miR-1252-5p | -0.04 | -0.04 N/A |
| hsa-miR-1252-5p | -0.04 | -0.09 N/A |
| hsa-miR-1252-5p | -0.04 | -0.04 N/A |
| hsa-miR-1252-5p | -0.04 | -0.27 N/A |
| hsa-miR-1252-5p | -0.04 | -0.2 N/A  |
| hsa-miR-1252-5p | -0.04 | -0.29 N/A |
| hsa-miR-1252-5p | -0.04 | -0.1 N/A  |
| hsa-miR-1252-5p | -0.04 | -0.04 N/A |
| hsa-miR-1252-5p | -0.04 | -0.11 N/A |
| hsa-miR-1252-5p | -0.04 | -0.04 N/A |
| hsa-miR-1252-5p | -0.04 | -0.14 N/A |
| hsa-miR-1252-5p | -0.04 | -0.04 N/A |
| hsa-miR-1252-5p | -0.04 | -0.04 N/A |
| hsa-miR-1252-5p | -0.04 | -0.04 N/A |
| hsa-miR-1252-5p | -0.04 | -0.11 N/A |
| hsa-miR-1252-5p | -0.04 | -0.12 N/A |
| hsa-miR-1252-5p | -0.04 | -0.09 N/A |
| hsa-miR-1252-5p | -0.04 | -0.06 N/A |
| hsa-miR-1252-5p | -0.04 | -0.04 N/A |
| hsa-miR-1252-5p | -0.04 | -0.04 N/A |
| hsa-miR-1252-5p | -0.04 | -0.23 N/A |
| hsa-miR-1252-5p | -0.04 | -0.06 N/A |
| hsa-miR-1252-5p | -0.04 | -0.19 N/A |
| hsa-miR-1252-5p | -0.04 | -0.4 N/A  |
| hsa-miR-1252-5p | -0.04 | -0.04 N/A |
| hsa-miR-1252-5p | -0.04 | -0.04 N/A |
| hsa-miR-1252-5p | -0.04 | -0.18 N/A |
| hsa-miR-1252-5p | -0.04 | -0.1 N/A  |
| hsa-miR-1252-5p | -0.04 | -0.04 N/A |
| hsa-miR-1252-5p | -0.04 | -0.12 N/A |
| hsa-miR-1252-5p | -0.04 | -0.04 N/A |
| hsa-miR-1252-5p | -0.04 | -0.05 N/A |
| hsa-miR-1252-5p | -0.04 | -0.2 N/A  |
| hsa-miR-1252-5p | -0.04 | -0.07 N/A |
| hsa-miR-1252-5p | -0.04 | -0.18 N/A |
| hsa-miR-1252-5p | -0.04 | -0.07 N/A |
| hsa-miR-1252-5p | -0.04 | -0.1 N/A  |
| hsa-miR-1252-5p | -0.04 | -0.19 N/A |

|                 |       |           |
|-----------------|-------|-----------|
| hsa-miR-1252-5p | -0.04 | -0.07 N/A |
| hsa-miR-1252-5p | -0.04 | -0.05 N/A |
| hsa-miR-1252-5p | -0.04 | -0.1 N/A  |
| hsa-miR-1252-5p | -0.04 | -0.16 N/A |
| hsa-miR-1252-5p | -0.04 | -0.04 N/A |
| hsa-miR-1252-5p | -0.04 | -0.14 N/A |
| hsa-miR-1252-5p | -0.04 | -0.04 N/A |
| hsa-miR-1252-5p | -0.04 | -0.04 N/A |
| hsa-miR-1252-5p | -0.04 | -0.17 N/A |
| hsa-miR-1252-5p | -0.04 | -0.08 N/A |
| hsa-miR-1252-5p | -0.04 | -0.32 N/A |
| hsa-miR-1252-5p | -0.04 | -0.04 N/A |
| hsa-miR-1252-5p | -0.04 | -0.16 N/A |
| hsa-miR-1252-5p | -0.04 | -0.04 N/A |
| hsa-miR-1252-5p | -0.04 | -0.06 N/A |
| hsa-miR-1252-5p | -0.04 | -0.04 N/A |
| hsa-miR-1252-5p | -0.04 | -0.04 N/A |
| hsa-miR-1252-5p | -0.04 | -0.14 N/A |
| hsa-miR-1252-5p | -0.04 | -0.15 N/A |
| hsa-miR-1252-5p | -0.04 | -0.04 N/A |
| hsa-miR-1252-5p | -0.04 | -0.28 N/A |
| hsa-miR-1252-5p | -0.04 | -0.04 N/A |
| hsa-miR-1252-5p | -0.04 | -0.04 N/A |
| hsa-miR-1252-5p | -0.03 | -0.07 N/A |
| hsa-miR-1252-5p | -0.03 | -0.4 N/A  |
| hsa-miR-1252-5p | -0.03 | -0.04 N/A |
| hsa-miR-1252-5p | -0.03 | -0.04 N/A |
| hsa-miR-1252-5p | -0.03 | -0.12 N/A |
| hsa-miR-1252-5p | -0.03 | -0.05 N/A |
| hsa-miR-1252-5p | -0.03 | -0.04 N/A |
| hsa-miR-1252-5p | -0.03 | -0.14 N/A |
| hsa-miR-1252-5p | -0.03 | -0.18 N/A |
| hsa-miR-1252-5p | -0.03 | -0.16 N/A |
| hsa-miR-1252-5p | -0.03 | -0.25 N/A |
| hsa-miR-1252-5p | -0.03 | -0.06 N/A |
| hsa-miR-1252-5p | -0.03 | -0.03 N/A |
| hsa-miR-1252-5p | -0.03 | -0.04 N/A |
| hsa-miR-1252-5p | -0.03 | -0.05 N/A |
| hsa-miR-1252-5p | -0.03 | -0.2 N/A  |
| hsa-miR-1252-5p | -0.03 | -0.23 N/A |
| hsa-miR-1252-5p | -0.03 | -0.14 N/A |
| hsa-miR-1252-5p | -0.03 | -0.04 N/A |

|                 |       |           |
|-----------------|-------|-----------|
| hsa-miR-1252-5p | -0.03 | -0.1 N/A  |
| hsa-miR-1252-5p | -0.03 | -0.1 N/A  |
| hsa-miR-1252-5p | -0.03 | -0.14 N/A |
| hsa-miR-1252-5p | -0.03 | -0.14 N/A |
| hsa-miR-1252-5p | -0.03 | -0.03 N/A |
| hsa-miR-1252-5p | -0.03 | -0.47 N/A |
| hsa-miR-1252-5p | -0.03 | -0.05 N/A |
| hsa-miR-1252-5p | -0.03 | -0.14 N/A |
| hsa-miR-1252-5p | -0.03 | -0.06 N/A |
| hsa-miR-1252-5p | -0.03 | -0.4 N/A  |
| hsa-miR-1252-5p | -0.03 | -0.07 N/A |
| hsa-miR-1252-5p | -0.03 | -0.28 N/A |
| hsa-miR-1252-5p | -0.03 | -0.03 N/A |
| hsa-miR-1252-5p | -0.03 | -0.03 N/A |
| hsa-miR-1252-5p | -0.03 | -0.03 N/A |
| hsa-miR-1252-5p | -0.03 | -0.1 N/A  |
| hsa-miR-1252-5p | -0.03 | -0.08 N/A |
| hsa-miR-1252-5p | -0.03 | -0.05 N/A |
| hsa-miR-1252-5p | -0.03 | -0.1 N/A  |
| hsa-miR-1252-5p | -0.03 | -0.04 N/A |
| hsa-miR-1252-5p | -0.03 | -0.14 N/A |
| hsa-miR-1252-5p | -0.03 | -0.11 N/A |
| hsa-miR-1252-5p | -0.03 | -0.08 N/A |
| hsa-miR-1252-5p | -0.03 | -0.06 N/A |
| hsa-miR-1252-5p | -0.03 | -0.41 N/A |
| hsa-miR-1252-5p | -0.03 | -0.08 N/A |
| hsa-miR-1252-5p | -0.03 | -0.21 N/A |
| hsa-miR-1252-5p | -0.03 | -0.05 N/A |
| hsa-miR-1252-5p | -0.03 | -0.15 N/A |
| hsa-miR-1252-5p | -0.03 | -0.03 N/A |
| hsa-miR-1252-5p | -0.03 | -0.03 N/A |
| hsa-miR-1252-5p | -0.03 | -0.03 N/A |
| hsa-miR-1252-5p | -0.03 | -0.07 N/A |
| hsa-miR-1252-5p | -0.03 | -0.07 N/A |
| hsa-miR-1252-5p | -0.03 | -0.26 N/A |
| hsa-miR-1252-5p | -0.03 | -0.09 N/A |
| hsa-miR-1252-5p | -0.03 | -0.07 N/A |
| hsa-miR-1252-5p | -0.03 | -0.21 N/A |
| hsa-miR-1252-5p | -0.03 | -0.08 N/A |
| hsa-miR-1252-5p | -0.03 | -0.25 N/A |
| hsa-miR-1252-5p | -0.03 | -0.2 N/A  |
| hsa-miR-1252-5p | -0.03 | -0.14 N/A |
| hsa-miR-1252-5p | -0.03 | -0.06 N/A |
| hsa-miR-1252-5p | -0.03 | -0.04 N/A |
| hsa-miR-1252-5p | -0.03 | -0.03 N/A |
| hsa-miR-1252-5p | -0.03 | -0.03 N/A |
| hsa-miR-1252-5p | -0.03 | -0.03 N/A |
| hsa-miR-1252-5p | -0.03 | -0.04 N/A |
| hsa-miR-1252-5p | -0.03 | -0.14 N/A |
| hsa-miR-1252-5p | -0.03 | -0.03 N/A |
| hsa-miR-1252-5p | -0.03 | -0.14 N/A |
| hsa-miR-1252-5p | -0.03 | -0.17 N/A |



|                 |       |           |
|-----------------|-------|-----------|
| hsa-miR-1252-5p | -0.03 | -0.14 N/A |
| hsa-miR-1252-5p | -0.03 | -0.03 N/A |
| hsa-miR-1252-5p | -0.03 | -0.04 N/A |
| hsa-miR-1252-5p | -0.03 | -0.03 N/A |
| hsa-miR-1252-5p | -0.03 | -0.03 N/A |
| hsa-miR-1252-5p | -0.03 | -0.22 N/A |
| hsa-miR-1252-5p | -0.03 | -0.09 N/A |
| hsa-miR-1252-5p | -0.03 | -0.03 N/A |
| hsa-miR-1252-5p | -0.03 | -0.12 N/A |
| hsa-miR-1252-5p | -0.03 | -0.07 N/A |
| hsa-miR-1252-5p | -0.03 | -0.09 N/A |
| hsa-miR-1252-5p | -0.03 | -0.09 N/A |
| hsa-miR-1252-5p | -0.03 | -0.2 N/A  |
| hsa-miR-1252-5p | -0.03 | -0.06 N/A |
| hsa-miR-1252-5p | -0.03 | -0.03 N/A |
| hsa-miR-1252-5p | -0.03 | -0.17 N/A |
| hsa-miR-1252-5p | -0.03 | -0.09 N/A |
| hsa-miR-1252-5p | -0.03 | -0.27 N/A |
| hsa-miR-1252-5p | -0.03 | -0.06 N/A |
| hsa-miR-1252-5p | -0.03 | -0.03 N/A |
| hsa-miR-1252-5p | -0.03 | -0.24 N/A |
| hsa-miR-1252-5p | -0.03 | -0.03 N/A |
| hsa-miR-1252-5p | -0.03 | -0.11 N/A |
| hsa-miR-1252-5p | -0.03 | -0.03 N/A |
| hsa-miR-1252-5p | -0.03 | -0.05 N/A |
| hsa-miR-1252-5p | -0.03 | -0.03 N/A |
| hsa-miR-1252-5p | -0.03 | -0.13 N/A |
| hsa-miR-1252-5p | -0.03 | -0.25 N/A |
| hsa-miR-1252-5p | -0.03 | -0.07 N/A |
| hsa-miR-1252-5p | -0.03 | -0.05 N/A |
| hsa-miR-1252-5p | -0.03 | -0.03 N/A |
| hsa-miR-1252-5p | -0.03 | -0.07 N/A |
| hsa-miR-1252-5p | -0.03 | -0.08 N/A |
| hsa-miR-1252-5p | -0.03 | -0.03 N/A |
| hsa-miR-1252-5p | -0.03 | -0.11 N/A |
| hsa-miR-1252-5p | -0.03 | -0.03 N/A |
| hsa-miR-1252-5p | -0.03 | -0.08 N/A |
| hsa-miR-1252-5p | -0.03 | -0.13 N/A |
| hsa-miR-1252-5p | -0.03 | -0.06 N/A |
| hsa-miR-1252-5p | -0.03 | -0.1 N/A  |
| hsa-miR-1252-5p | -0.03 | -0.08 N/A |
| hsa-miR-1252-5p | -0.03 | -0.03 N/A |
| hsa-miR-1252-5p | -0.03 | -0.1 N/A  |
| hsa-miR-1252-5p | -0.03 | -0.15 N/A |
| hsa-miR-1252-5p | -0.03 | -0.53 N/A |
| hsa-miR-1252-5p | -0.03 | -0.08 N/A |
| hsa-miR-1252-5p | -0.03 | -0.12 N/A |
| hsa-miR-1252-5p | -0.03 | -0.03 N/A |

|                 |       |           |
|-----------------|-------|-----------|
| hsa-miR-1252-5p | -0.03 | -0.03 N/A |
| hsa-miR-1252-5p | -0.03 | -0.04 N/A |
| hsa-miR-1252-5p | -0.03 | -0.12 N/A |
| hsa-miR-1252-5p | -0.03 | -0.11 N/A |
| hsa-miR-1252-5p | -0.03 | -0.07 N/A |
| hsa-miR-1252-5p | -0.03 | -0.03 N/A |
| hsa-miR-1252-5p | -0.03 | -0.08 N/A |
| hsa-miR-1252-5p | -0.03 | -0.03 N/A |
| hsa-miR-1252-5p | -0.03 | -0.27 N/A |
| hsa-miR-1252-5p | -0.03 | -0.12 N/A |
| hsa-miR-1252-5p | -0.03 | -0.14 N/A |
| hsa-miR-1252-5p | -0.03 | -0.03 N/A |
| hsa-miR-1252-5p | -0.03 | -0.08 N/A |
| hsa-miR-1252-5p | -0.03 | -0.29 N/A |
| hsa-miR-1252-5p | -0.03 | -0.03 N/A |
| hsa-miR-1252-5p | -0.03 | -0.04 N/A |
| hsa-miR-1252-5p | -0.03 | -0.12 N/A |
| hsa-miR-1252-5p | -0.03 | -0.05 N/A |
| hsa-miR-1252-5p | -0.03 | -0.16 N/A |
| hsa-miR-1252-5p | -0.03 | -0.04 N/A |
| hsa-miR-1252-5p | -0.03 | -0.12 N/A |
| hsa-miR-1252-5p | -0.03 | -0.05 N/A |
| hsa-miR-1252-5p | -0.03 | -0.15 N/A |
| hsa-miR-1252-5p | -0.03 | -0.03 N/A |
| hsa-miR-1252-5p | -0.03 | -0.03 N/A |
| hsa-miR-1252-5p | -0.03 | -0.28 N/A |
| hsa-miR-1252-5p | -0.03 | -0.03 N/A |
| hsa-miR-1252-5p | -0.03 | -0.06 N/A |
| hsa-miR-1252-5p | -0.03 | -0.03 N/A |
| hsa-miR-1252-5p | -0.03 | -0.06 N/A |
| hsa-miR-1252-5p | -0.03 | -0.04 N/A |
| hsa-miR-1252-5p | -0.03 | -0.04 N/A |
| hsa-miR-1252-5p | -0.03 | -0.04 N/A |
| hsa-miR-1252-5p | -0.03 | -0.22 N/A |
| hsa-miR-1252-5p | -0.03 | -0.08 N/A |
| hsa-miR-1252-5p | -0.03 | -0.03 N/A |
| hsa-miR-1252-5p | -0.03 | -0.12 N/A |
| hsa-miR-1252-5p | -0.03 | -0.19 N/A |
| hsa-miR-1252-5p | -0.03 | -0.04 N/A |
| hsa-miR-1252-5p | -0.03 | -0.07 N/A |
| hsa-miR-1252-5p | -0.03 | -0.03 N/A |
| hsa-miR-1252-5p | -0.03 | -0.15 N/A |
| hsa-miR-1252-5p | -0.03 | -0.04 N/A |
| hsa-miR-1252-5p | -0.03 | -0.04 N/A |
| hsa-miR-1252-5p | -0.03 | -0.03 N/A |
| hsa-miR-1252-5p | -0.03 | -0.06 N/A |
| hsa-miR-1252-5p | -0.03 | -0.03 N/A |
| hsa-miR-1252-5p | -0.03 | -0.06 N/A |
| hsa-miR-1252-5p | -0.03 | -0.09 N/A |

|                 |       |           |
|-----------------|-------|-----------|
| hsa-miR-1252-5p | -0.03 | -0.08 N/A |
| hsa-miR-1252-5p | -0.03 | -0.12 N/A |
| hsa-miR-1252-5p | -0.03 | -0.11 N/A |
| hsa-miR-1252-5p | -0.03 | -0.03 N/A |
| hsa-miR-1252-5p | -0.03 | -0.2 N/A  |
| hsa-miR-1252-5p | -0.03 | -0.15 N/A |
| hsa-miR-1252-5p | -0.03 | -0.05 N/A |
| hsa-miR-1252-5p | -0.03 | -0.03 N/A |
| hsa-miR-1252-5p | -0.03 | -0.08 N/A |
| hsa-miR-1252-5p | -0.03 | -0.03 N/A |
| hsa-miR-1252-5p | -0.03 | -0.03 N/A |
| hsa-miR-1252-5p | -0.03 | -0.41 N/A |
| hsa-miR-1252-5p | -0.03 | -0.03 N/A |
| hsa-miR-1252-5p | -0.03 | -0.05 N/A |
| hsa-miR-1252-5p | -0.03 | -0.24 N/A |
| hsa-miR-1252-5p | -0.03 | -0.18 N/A |
| hsa-miR-1252-5p | -0.03 | -0.03 N/A |
| hsa-miR-1252-5p | -0.03 | -0.03 N/A |
| hsa-miR-1252-5p | -0.03 | -0.06 N/A |
| hsa-miR-1252-5p | -0.03 | -0.03 N/A |
| hsa-miR-1252-5p | -0.03 | -0.03 N/A |
| hsa-miR-1252-5p | -0.03 | -0.17 N/A |
| hsa-miR-1252-5p | -0.03 | -0.21 N/A |
| hsa-miR-1252-5p | -0.03 | -0.04 N/A |
| hsa-miR-1252-5p | -0.03 | -0.31 N/A |
| hsa-miR-1252-5p | -0.03 | -0.03 N/A |
| hsa-miR-1252-5p | -0.03 | -0.2 N/A  |
| hsa-miR-1252-5p | -0.03 | -0.5 N/A  |
| hsa-miR-1252-5p | -0.03 | -0.39 N/A |
| hsa-miR-1252-5p | -0.03 | -0.03 N/A |
| hsa-miR-1252-5p | -0.03 | -0.22 N/A |
| hsa-miR-1252-5p | -0.03 | -0.03 N/A |
| hsa-miR-1252-5p | -0.03 | -0.03 N/A |
| hsa-miR-1252-5p | -0.03 | -0.03 N/A |
| hsa-miR-1252-5p | -0.02 | -0.31 N/A |
| hsa-miR-1252-5p | -0.02 | -0.1 N/A  |
| hsa-miR-1252-5p | -0.02 | -0.23 N/A |
| hsa-miR-1252-5p | -0.02 | -0.09 N/A |
| hsa-miR-1252-5p | -0.02 | -0.1 N/A  |
| hsa-miR-1252-5p | -0.02 | -0.17 N/A |
| hsa-miR-1252-5p | -0.02 | -0.22 N/A |
| hsa-miR-1252-5p | -0.02 | -0.09 N/A |
| hsa-miR-1252-5p | -0.02 | -0.39 N/A |
| hsa-miR-1252-5p | -0.02 | -0.03 N/A |
| hsa-miR-1252-5p | -0.02 | -0.04 N/A |
| hsa-miR-1252-5p | -0.02 | -0.05 N/A |
| hsa-miR-1252-5p | -0.02 | -0.03 N/A |
| hsa-miR-1252-5p | -0.02 | -0.04 N/A |
| hsa-miR-1252-5p | -0.02 | -0.19 N/A |
| hsa-miR-1252-5p | -0.02 | -0.09 N/A |
| hsa-miR-1252-5p | -0.02 | -0.23 N/A |
| hsa-miR-1252-5p | -0.02 | -0.14 N/A |
| hsa-miR-1252-5p | -0.02 | -0.02 N/A |
| hsa-miR-1252-5p | -0.02 | -0.02 N/A |



|                 |       |           |
|-----------------|-------|-----------|
| hsa-miR-1252-5p | -0.02 | -0.02 N/A |
| hsa-miR-1252-5p | -0.02 | -0.06 N/A |
| hsa-miR-1252-5p | -0.02 | -0.07 N/A |
| hsa-miR-1252-5p | -0.02 | -0.19 N/A |
| hsa-miR-1252-5p | -0.02 | -0.11 N/A |
| hsa-miR-1252-5p | -0.02 | -0.05 N/A |
| hsa-miR-1252-5p | -0.02 | -0.15 N/A |
| hsa-miR-1252-5p | -0.02 | -0.11 N/A |
| hsa-miR-1252-5p | -0.02 | -0.25 N/A |
| hsa-miR-1252-5p | -0.02 | -0.14 N/A |
| hsa-miR-1252-5p | -0.02 | -0.03 N/A |
| hsa-miR-1252-5p | -0.02 | -0.12 N/A |
| hsa-miR-1252-5p | -0.02 | -0.24 N/A |
| hsa-miR-1252-5p | -0.02 | -0.2 N/A  |
| hsa-miR-1252-5p | -0.02 | -0.08 N/A |
| hsa-miR-1252-5p | -0.02 | -0.06 N/A |
| hsa-miR-1252-5p | -0.02 | -0.1 N/A  |
| hsa-miR-1252-5p | -0.02 | -0.08 N/A |
| hsa-miR-1252-5p | -0.02 | -0.02 N/A |
| hsa-miR-1252-5p | -0.02 | -0.12 N/A |
| hsa-miR-1252-5p | -0.02 | -0.1 N/A  |
| hsa-miR-1252-5p | -0.02 | -0.08 N/A |
| hsa-miR-1252-5p | -0.02 | -0.13 N/A |
| hsa-miR-1252-5p | -0.02 | -0.27 N/A |
| hsa-miR-1252-5p | -0.02 | -0.05 N/A |
| hsa-miR-1252-5p | -0.02 | -0.07 N/A |
| hsa-miR-1252-5p | -0.02 | -0.09 N/A |
| hsa-miR-1252-5p | -0.02 | -0.02 N/A |
| hsa-miR-1252-5p | -0.02 | -0.02 N/A |
| hsa-miR-1252-5p | -0.02 | -0.17 N/A |
| hsa-miR-1252-5p | -0.02 | -0.1 N/A  |
| hsa-miR-1252-5p | -0.02 | -0.05 N/A |
| hsa-miR-1252-5p | -0.02 | -0.03 N/A |
| hsa-miR-1252-5p | -0.02 | -0.08 N/A |
| hsa-miR-1252-5p | -0.02 | -0.04 N/A |
| hsa-miR-1252-5p | -0.02 | -0.04 N/A |
| hsa-miR-1252-5p | -0.02 | -0.04 N/A |
| hsa-miR-1252-5p | -0.02 | -0.18 N/A |
| hsa-miR-1252-5p | -0.02 | -0.38 N/A |
| hsa-miR-1252-5p | -0.02 | -0.03 N/A |
| hsa-miR-1252-5p | -0.02 | -0.03 N/A |
| hsa-miR-1252-5p | -0.02 | -0.03 N/A |
| hsa-miR-1252-5p | -0.02 | -0.09 N/A |
| hsa-miR-1252-5p | -0.02 | -0.03 N/A |
| hsa-miR-1252-5p | -0.02 | -0.03 N/A |
| hsa-miR-1252-5p | -0.02 | -0.07 N/A |
| hsa-miR-1252-5p | -0.02 | -0.09 N/A |
| hsa-miR-1252-5p | -0.02 | -0.16 N/A |
| hsa-miR-1252-5p | -0.02 | -0.1 N/A  |
| hsa-miR-1252-5p | -0.02 | -0.05 N/A |
| hsa-miR-1252-5p | -0.02 | -0.1 N/A  |
| hsa-miR-1252-5p | -0.02 | -0.34 N/A |
| hsa-miR-1252-5p | -0.02 | -0.03 N/A |
| hsa-miR-1252-5p | -0.02 | -0.02 N/A |

|                 |       |           |
|-----------------|-------|-----------|
| hsa-miR-1252-5p | -0.02 | -0.02 N/A |
| hsa-miR-1252-5p | -0.02 | -0.18 N/A |
| hsa-miR-1252-5p | -0.02 | -0.17 N/A |
| hsa-miR-1252-5p | -0.02 | -0.04 N/A |
| hsa-miR-1252-5p | -0.02 | -0.24 N/A |
| hsa-miR-1252-5p | -0.02 | -0.09 N/A |
| hsa-miR-1252-5p | -0.02 | -0.99 N/A |
| hsa-miR-1252-5p | -0.02 | -0.23 N/A |
| hsa-miR-1252-5p | -0.02 | -0.1 N/A  |
| hsa-miR-1252-5p | -0.02 | -0.12 N/A |
| hsa-miR-1252-5p | -0.02 | -0.23 N/A |
| hsa-miR-1252-5p | -0.02 | -0.08 N/A |
| hsa-miR-1252-5p | -0.02 | -0.04 N/A |
| hsa-miR-1252-5p | -0.02 | -0.02 N/A |
| hsa-miR-1252-5p | -0.02 | -0.1 N/A  |
| hsa-miR-1252-5p | -0.02 | -0.03 N/A |
| hsa-miR-1252-5p | -0.02 | -0.29 N/A |
| hsa-miR-1252-5p | -0.02 | -0.19 N/A |
| hsa-miR-1252-5p | -0.02 | -0.02 N/A |
| hsa-miR-1252-5p | -0.02 | -0.03 N/A |
| hsa-miR-1252-5p | -0.02 | -0.05 N/A |
| hsa-miR-1252-5p | -0.02 | -0.33 N/A |
| hsa-miR-1252-5p | -0.02 | -0.09 N/A |
| hsa-miR-1252-5p | -0.02 | -0.05 N/A |
| hsa-miR-1252-5p | -0.02 | -0.12 N/A |
| hsa-miR-1252-5p | -0.02 | -0.17 N/A |
| hsa-miR-1252-5p | -0.02 | -0.07 N/A |
| hsa-miR-1252-5p | -0.02 | -0.19 N/A |
| hsa-miR-1252-5p | -0.02 | -0.15 N/A |
| hsa-miR-1252-5p | -0.02 | -0.21 N/A |
| hsa-miR-1252-5p | -0.02 | -0.04 N/A |
| hsa-miR-1252-5p | -0.02 | -0.03 N/A |
| hsa-miR-1252-5p | -0.02 | -0.04 N/A |
| hsa-miR-1252-5p | -0.02 | -0.21 N/A |
| hsa-miR-1252-5p | -0.02 | -0.02 N/A |
| hsa-miR-1252-5p | -0.02 | -0.14 N/A |
| hsa-miR-1252-5p | -0.02 | -0.19 N/A |
| hsa-miR-1252-5p | -0.02 | -0.13 N/A |
| hsa-miR-1252-5p | -0.02 | -0.44 N/A |
| hsa-miR-1252-5p | -0.02 | -0.07 N/A |
| hsa-miR-1252-5p | -0.02 | -0.02 N/A |









|                 |       |           |
|-----------------|-------|-----------|
| hsa-miR-1252-5p | -0.02 | -0.02 N/A |
| hsa-miR-1252-5p | -0.02 | -0.3 N/A  |
| hsa-miR-1252-5p | -0.02 | -0.1 N/A  |
| hsa-miR-1252-5p | -0.02 | -0.02 N/A |
| hsa-miR-1252-5p | -0.02 | -0.02 N/A |
| hsa-miR-1252-5p | -0.02 | -0.02 N/A |
| hsa-miR-1252-5p | -0.02 | -0.02 N/A |
| hsa-miR-1252-5p | -0.02 | -0.02 N/A |
| hsa-miR-1252-5p | -0.02 | -0.07 N/A |
| hsa-miR-1252-5p | -0.02 | -0.11 N/A |
| hsa-miR-1252-5p | -0.02 | -0.02 N/A |
| hsa-miR-1252-5p | -0.02 | -0.02 N/A |
| hsa-miR-1252-5p | -0.02 | -0.02 N/A |
| hsa-miR-1252-5p | -0.02 | -0.11 N/A |
| hsa-miR-1252-5p | -0.02 | -0.02 N/A |
| hsa-miR-1252-5p | -0.02 | -0.02 N/A |
| hsa-miR-1252-5p | -0.02 | -0.1 N/A  |
| hsa-miR-1252-5p | -0.02 | -0.18 N/A |
| hsa-miR-1252-5p | -0.02 | -0.04 N/A |
| hsa-miR-1252-5p | -0.02 | -0.04 N/A |
| hsa-miR-1252-5p | -0.02 | -0.08 N/A |
| hsa-miR-1252-5p | -0.02 | -0.08 N/A |
| hsa-miR-1252-5p | -0.02 | -0.02 N/A |
| hsa-miR-1252-5p | -0.02 | -0.02 N/A |
| hsa-miR-1252-5p | -0.02 | -0.05 N/A |
| hsa-miR-1252-5p | -0.02 | -0.02 N/A |
| hsa-miR-1252-5p | -0.02 | -0.25 N/A |
| hsa-miR-1252-5p | -0.02 | -0.47 N/A |
| hsa-miR-1252-5p | -0.02 | -0.06 N/A |
| hsa-miR-1252-5p | -0.02 | -0.05 N/A |
| hsa-miR-1252-5p | -0.02 | -0.03 N/A |
| hsa-miR-1252-5p | -0.02 | -0.02 N/A |
| hsa-miR-1252-5p | -0.02 | -0.02 N/A |
| hsa-miR-1252-5p | -0.02 | -0.21 N/A |
| hsa-miR-1252-5p | -0.02 | -0.15 N/A |
| hsa-miR-1252-5p | -0.02 | -0.15 N/A |
| hsa-miR-1252-5p | -0.02 | -0.07 N/A |
| hsa-miR-1252-5p | -0.02 | -0.1 N/A  |
| hsa-miR-1252-5p | -0.02 | -0.02 N/A |
| hsa-miR-1252-5p | -0.02 | -0.16 N/A |
| hsa-miR-1252-5p | -0.02 | -0.11 N/A |
| hsa-miR-1252-5p | -0.02 | -0.03 N/A |
| hsa-miR-1252-5p | -0.02 | -0.06 N/A |
| hsa-miR-1252-5p | -0.02 | -0.02 N/A |
| hsa-miR-1252-5p | -0.02 | -0.02 N/A |
| hsa-miR-1252-5p | -0.02 | -0.1 N/A  |
| hsa-miR-1252-5p | -0.02 | -0.07 N/A |
| hsa-miR-1252-5p | -0.02 | -0.02 N/A |
| hsa-miR-1252-5p | -0.02 | -0.11 N/A |
| hsa-miR-1252-5p | -0.02 | -0.17 N/A |
| hsa-miR-1252-5p | -0.02 | -0.2 N/A  |
| hsa-miR-1252-5p | -0.02 | -0.11 N/A |
| hsa-miR-1252-5p | -0.02 | -0.02 N/A |
| hsa-miR-1252-5p | -0.02 | -0.02 N/A |

|                 |       |           |
|-----------------|-------|-----------|
| hsa-miR-1252-5p | -0.02 | -0.02 N/A |
| hsa-miR-1252-5p | -0.02 | -0.06 N/A |
| hsa-miR-1252-5p | -0.02 | -0.03 N/A |
| hsa-miR-1252-5p | -0.02 | -0.02 N/A |
| hsa-miR-1252-5p | -0.02 | -0.08 N/A |
| hsa-miR-1252-5p | -0.02 | -0.15 N/A |
| hsa-miR-1252-5p | -0.02 | -0.03 N/A |
| hsa-miR-1252-5p | -0.02 | -0.03 N/A |
| hsa-miR-1252-5p | -0.02 | -0.05 N/A |
| hsa-miR-1252-5p | -0.02 | -0.02 N/A |
| hsa-miR-1252-5p | -0.02 | -0.03 N/A |
| hsa-miR-1252-5p | -0.02 | -0.02 N/A |
| hsa-miR-1252-5p | -0.02 | -0.02 N/A |
| hsa-miR-1252-5p | -0.02 | -0.03 N/A |
| hsa-miR-1252-5p | -0.02 | -0.02 N/A |
| hsa-miR-1252-5p | -0.02 | -0.02 N/A |
| hsa-miR-1252-5p | -0.02 | -0.03 N/A |
| hsa-miR-1252-5p | -0.02 | -0.02 N/A |
| hsa-miR-1252-5p | -0.02 | -0.1 N/A  |
| hsa-miR-1252-5p | -0.02 | -0.05 N/A |
| hsa-miR-1252-5p | -0.02 | -0.12 N/A |
| hsa-miR-1252-5p | -0.02 | -0.08 N/A |
| hsa-miR-1252-5p | -0.02 | -0.08 N/A |
| hsa-miR-1252-5p | -0.02 | -0.04 N/A |
| hsa-miR-1252-5p | -0.02 | -0.02 N/A |
| hsa-miR-1252-5p | -0.02 | -0.15 N/A |
| hsa-miR-1252-5p | -0.02 | -0.21 N/A |
| hsa-miR-1252-5p | -0.02 | -0.14 N/A |
| hsa-miR-1252-5p | -0.02 | -0.07 N/A |
| hsa-miR-1252-5p | -0.02 | -0.03 N/A |
| hsa-miR-1252-5p | -0.02 | -0.19 N/A |
| hsa-miR-1252-5p | -0.02 | -0.08 N/A |
| hsa-miR-1252-5p | -0.02 | -0.07 N/A |
| hsa-miR-1252-5p | -0.02 | -0.02 N/A |
| hsa-miR-1252-5p | -0.02 | -0.02 N/A |
| hsa-miR-1252-5p | -0.02 | -0.3 N/A  |
| hsa-miR-1252-5p | -0.02 | -0.15 N/A |
| hsa-miR-1252-5p | -0.02 | -0.02 N/A |
| hsa-miR-1252-5p | -0.02 | -0.35 N/A |
| hsa-miR-1252-5p | -0.02 | -0.18 N/A |
| hsa-miR-1252-5p | -0.02 | -0.02 N/A |
| hsa-miR-1252-5p | -0.02 | -0.02 N/A |
| hsa-miR-1252-5p | -0.02 | -0.17 N/A |
| hsa-miR-1252-5p | -0.02 | -0.03 N/A |
| hsa-miR-1252-5p | -0.02 | -0.02 N/A |
| hsa-miR-1252-5p | -0.02 | -0.02 N/A |
| hsa-miR-1252-5p | -0.02 | -0.02 N/A |
| hsa-miR-1252-5p | -0.02 | -0.2 N/A  |
| hsa-miR-1252-5p | -0.02 | -0.02 N/A |
| hsa-miR-1252-5p | -0.02 | -0.24 N/A |
| hsa-miR-1252-5p | -0.02 | -0.05 N/A |
| hsa-miR-1252-5p | -0.02 | -0.3 N/A  |
| hsa-miR-1252-5p | -0.02 | -0.45 N/A |
| hsa-miR-1252-5p | -0.02 | -0.02 N/A |
| hsa-miR-1252-5p | -0.02 | -0.11 N/A |



|                 |       |           |
|-----------------|-------|-----------|
| hsa-miR-1252-5p | -0.02 | -0.03 N/A |
| hsa-miR-1252-5p | -0.02 | -0.09 N/A |
| hsa-miR-1252-5p | -0.02 | -0.02 N/A |
| hsa-miR-1252-5p | -0.02 | -0.46 N/A |
| hsa-miR-1252-5p | -0.02 | -0.03 N/A |
| hsa-miR-1252-5p | -0.02 | -0.04 N/A |
| hsa-miR-1252-5p | -0.02 | -0.02 N/A |
| hsa-miR-1252-5p | -0.02 | -0.15 N/A |
| hsa-miR-1252-5p | -0.02 | -0.31 N/A |
| hsa-miR-1252-5p | -0.02 | -0.02 N/A |
| hsa-miR-1252-5p | -0.02 | -0.02 N/A |
| hsa-miR-1252-5p | -0.02 | -0.1 N/A  |
| hsa-miR-1252-5p | -0.02 | -0.11 N/A |
| hsa-miR-1252-5p | -0.02 | -0.02 N/A |
| hsa-miR-1252-5p | -0.02 | -0.09 N/A |
| hsa-miR-1252-5p | -0.02 | -0.02 N/A |
| hsa-miR-1252-5p | -0.02 | -0.02 N/A |
| hsa-miR-1252-5p | -0.02 | -0.79 N/A |
| hsa-miR-1252-5p | -0.02 | -0.03 N/A |
| hsa-miR-1252-5p | -0.02 | -0.52 N/A |
| hsa-miR-1252-5p | -0.02 | -0.12 N/A |
| hsa-miR-1252-5p | -0.02 | -0.15 N/A |
| hsa-miR-1252-5p | -0.02 | -0.15 N/A |
| hsa-miR-1252-5p | -0.02 | -0.04 N/A |
| hsa-miR-1252-5p | -0.02 | -0.08 N/A |
| hsa-miR-1252-5p | -0.02 | -0.1 N/A  |
| hsa-miR-1252-5p | -0.02 | -0.02 N/A |
| hsa-miR-1252-5p | -0.01 | -0.03 N/A |
| hsa-miR-1252-5p | -0.01 | -0.06 N/A |
| hsa-miR-1252-5p | -0.01 | -0.06 N/A |
| hsa-miR-1252-5p | -0.01 | -0.02 N/A |
| hsa-miR-1252-5p | -0.01 | -0.02 N/A |
| hsa-miR-1252-5p | -0.01 | -0.04 N/A |
| hsa-miR-1252-5p | -0.01 | -0.13 N/A |
| hsa-miR-1252-5p | -0.01 | -0.32 N/A |
| hsa-miR-1252-5p | -0.01 | -0.02 N/A |
| hsa-miR-1252-5p | -0.01 | -0.05 N/A |
| hsa-miR-1252-5p | -0.01 | -0.02 N/A |
| hsa-miR-1252-5p | -0.01 | -0.13 N/A |
| hsa-miR-1252-5p | -0.01 | -0.06 N/A |
| hsa-miR-1252-5p | -0.01 | -0.23 N/A |
| hsa-miR-1252-5p | -0.01 | -0.11 N/A |
| hsa-miR-1252-5p | -0.01 | -0.06 N/A |
| hsa-miR-1252-5p | -0.01 | -0.04 N/A |
| hsa-miR-1252-5p | -0.01 | -0.14 N/A |
| hsa-miR-1252-5p | -0.01 | -0.08 N/A |
| hsa-miR-1252-5p | -0.01 | -2.94 N/A |
| hsa-miR-1252-5p | -0.01 | -0.02 N/A |
| hsa-miR-1252-5p | -0.01 | -0.08 N/A |
| hsa-miR-1252-5p | -0.01 | -0.39 N/A |
| hsa-miR-1252-5p | -0.01 | -0.04 N/A |
| hsa-miR-1252-5p | -0.01 | -0.02 N/A |
| hsa-miR-1252-5p | -0.01 | -0.02 N/A |
| hsa-miR-1252-5p | -0.01 | -0.02 N/A |

|                 |       |           |
|-----------------|-------|-----------|
| hsa-miR-1252-5p | -0.01 | -0.07 N/A |
| hsa-miR-1252-5p | -0.01 | -0.16 N/A |
| hsa-miR-1252-5p | -0.01 | -0.09 N/A |
| hsa-miR-1252-5p | -0.01 | -0.02 N/A |
| hsa-miR-1252-5p | -0.01 | -0.03 N/A |
| hsa-miR-1252-5p | -0.01 | -0.24 N/A |
| hsa-miR-1252-5p | -0.01 | -0.23 N/A |
| hsa-miR-1252-5p | -0.01 | -0.99 N/A |
| hsa-miR-1252-5p | -0.01 | -0.16 N/A |
| hsa-miR-1252-5p | -0.01 | -0.46 N/A |
| hsa-miR-1252-5p | -0.01 | -0.04 N/A |
| hsa-miR-1252-5p | -0.01 | -0.15 N/A |
| hsa-miR-1252-5p | -0.01 | -0.02 N/A |
| hsa-miR-1252-5p | -0.01 | -0.04 N/A |
| hsa-miR-1252-5p | -0.01 | -0.04 N/A |
| hsa-miR-1252-5p | -0.01 | -0.05 N/A |
| hsa-miR-1252-5p | -0.01 | -0.03 N/A |
| hsa-miR-1252-5p | -0.01 | -0.19 N/A |
| hsa-miR-1252-5p | -0.01 | -0.26 N/A |
| hsa-miR-1252-5p | -0.01 | -0.02 N/A |
| hsa-miR-1252-5p | -0.01 | -0.04 N/A |
| hsa-miR-1252-5p | -0.01 | -0.09 N/A |
| hsa-miR-1252-5p | -0.01 | -0.03 N/A |
| hsa-miR-1252-5p | -0.01 | -0.02 N/A |
| hsa-miR-1252-5p | -0.01 | -0.11 N/A |
| hsa-miR-1252-5p | -0.01 | -0.01 N/A |
| hsa-miR-1252-5p | -0.01 | -0.03 N/A |
| hsa-miR-1252-5p | -0.01 | -0.15 N/A |
| hsa-miR-1252-5p | -0.01 | -0.26 N/A |
| hsa-miR-1252-5p | -0.01 | -0.03 N/A |
| hsa-miR-1252-5p | -0.01 | -0.05 N/A |
| hsa-miR-1252-5p | -0.01 | -0.03 N/A |
| hsa-miR-1252-5p | -0.01 | -0.04 N/A |
| hsa-miR-1252-5p | -0.01 | -0.1 N/A  |
| hsa-miR-1252-5p | -0.01 | -0.11 N/A |
| hsa-miR-1252-5p | -0.01 | -0.08 N/A |
| hsa-miR-1252-5p | -0.01 | -0.05 N/A |
| hsa-miR-1252-5p | -0.01 | -0.14 N/A |
| hsa-miR-1252-5p | -0.01 | -0.15 N/A |
| hsa-miR-1252-5p | -0.01 | -0.23 N/A |
| hsa-miR-1252-5p | -0.01 | -0.28 N/A |
| hsa-miR-1252-5p | -0.01 | -0.02 N/A |
| hsa-miR-1252-5p | -0.01 | -0.02 N/A |
| hsa-miR-1252-5p | -0.01 | -0.03 N/A |
| hsa-miR-1252-5p | -0.01 | -0.02 N/A |
| hsa-miR-1252-5p | -0.01 | -0.07 N/A |
| hsa-miR-1252-5p | -0.01 | -0.28 N/A |
| hsa-miR-1252-5p | -0.01 | -0.15 N/A |
| hsa-miR-1252-5p | -0.01 | -0.33 N/A |
| hsa-miR-1252-5p | -0.01 | -0.22 N/A |
| hsa-miR-1252-5p | -0.01 | -0.03 N/A |
| hsa-miR-1252-5p | -0.01 | -0.02 N/A |
| hsa-miR-1252-5p | -0.01 | -0.2 N/A  |
| hsa-miR-1252-5p | -0.01 | -0.02 N/A |

|                 |       |           |
|-----------------|-------|-----------|
| hsa-miR-1252-5p | -0.01 | -0.03 N/A |
| hsa-miR-1252-5p | -0.01 | -0.04 N/A |
| hsa-miR-1252-5p | -0.01 | -0.12 N/A |
| hsa-miR-1252-5p | -0.01 | -0.02 N/A |
| hsa-miR-1252-5p | -0.01 | -0.14 N/A |
| hsa-miR-1252-5p | -0.01 | -0.33 N/A |
| hsa-miR-1252-5p | -0.01 | -0.05 N/A |
| hsa-miR-1252-5p | -0.01 | -0.02 N/A |
| hsa-miR-1252-5p | -0.01 | -0.05 N/A |
| hsa-miR-1252-5p | -0.01 | -0.08 N/A |
| hsa-miR-1252-5p | -0.01 | -0.21 N/A |
| hsa-miR-1252-5p | -0.01 | -0.05 N/A |
| hsa-miR-1252-5p | -0.01 | -0.16 N/A |
| hsa-miR-1252-5p | -0.01 | -0.03 N/A |
| hsa-miR-1252-5p | -0.01 | -0.33 N/A |
| hsa-miR-1252-5p | -0.01 | -0.07 N/A |
| hsa-miR-1252-5p | -0.01 | -0.02 N/A |
| hsa-miR-1252-5p | -0.01 | -0.07 N/A |
| hsa-miR-1252-5p | -0.01 | -0.07 N/A |
| hsa-miR-1252-5p | -0.01 | -0.04 N/A |
| hsa-miR-1252-5p | -0.01 | -0.05 N/A |
| hsa-miR-1252-5p | -0.01 | -0.1 N/A  |
| hsa-miR-1252-5p | -0.01 | -0.29 N/A |
| hsa-miR-1252-5p | -0.01 | -0.02 N/A |
| hsa-miR-1252-5p | -0.01 | -0.05 N/A |
| hsa-miR-1252-5p | -0.01 | -0.02 N/A |
| hsa-miR-1252-5p | -0.01 | -0.44 N/A |
| hsa-miR-1252-5p | -0.01 | -0.78 N/A |
| hsa-miR-1252-5p | -0.01 | -0.07 N/A |
| hsa-miR-1252-5p | -0.01 | -1.1 N/A  |
| hsa-miR-1252-5p | -0.01 | -0.02 N/A |
| hsa-miR-1252-5p | -0.01 | -0.06 N/A |
| hsa-miR-1252-5p | -0.01 | -0.03 N/A |
| hsa-miR-1252-5p | -0.01 | -0.02 N/A |
| hsa-miR-1252-5p | -0.01 | -0.03 N/A |
| hsa-miR-1252-5p | -0.01 | -0.15 N/A |
| hsa-miR-1252-5p | -0.01 | -0.1 N/A  |
| hsa-miR-1252-5p | -0.01 | -0.15 N/A |
| hsa-miR-1252-5p | -0.01 | -0.08 N/A |
| hsa-miR-1252-5p | -0.01 | -0.1 N/A  |
| hsa-miR-1252-5p | -0.01 | -0.09 N/A |
| hsa-miR-1252-5p | -0.01 | -0.07 N/A |
| hsa-miR-1252-5p | -0.01 | -0.17 N/A |
| hsa-miR-1252-5p | -0.01 | -0.02 N/A |
| hsa-miR-1252-5p | -0.01 | -0.04 N/A |
| hsa-miR-1252-5p | -0.01 | -0.02 N/A |
| hsa-miR-1252-5p | -0.01 | -0.04 N/A |
| hsa-miR-1252-5p | -0.01 | -0.03 N/A |
| hsa-miR-1252-5p | -0.01 | -0.24 N/A |
| hsa-miR-1252-5p | -0.01 | -0.02 N/A |
| hsa-miR-1252-5p | -0.01 | -0.07 N/A |
| hsa-miR-1252-5p | -0.01 | -0.26 N/A |
| hsa-miR-1252-5p | -0.01 | -0.24 N/A |
| hsa-miR-1252-5p | -0.01 | -0.07 N/A |



|                 |       |           |
|-----------------|-------|-----------|
| hsa-miR-1252-5p | -0.01 | -0.03 N/A |
| hsa-miR-1252-5p | -0.01 | -0.02 N/A |
| hsa-miR-1252-5p | -0.01 | -0.27 N/A |
| hsa-miR-1252-5p | -0.01 | -0.23 N/A |
| hsa-miR-1252-5p | -0.01 | -0.02 N/A |
| hsa-miR-1252-5p | -0.01 | -0.01 N/A |
| hsa-miR-1252-5p | -0.01 | -0.04 N/A |
| hsa-miR-1252-5p | -0.01 | -0.22 N/A |
| hsa-miR-1252-5p | -0.01 | -0.1 N/A  |
| hsa-miR-1252-5p | -0.01 | -0.06 N/A |
| hsa-miR-1252-5p | -0.01 | -0.15 N/A |
| hsa-miR-1252-5p | -0.01 | -0.08 N/A |
| hsa-miR-1252-5p | -0.01 | -0.19 N/A |
| hsa-miR-1252-5p | -0.01 | -0.09 N/A |
| hsa-miR-1252-5p | -0.01 | -0.03 N/A |
| hsa-miR-1252-5p | -0.01 | -0.18 N/A |
| hsa-miR-1252-5p | -0.01 | -0.05 N/A |
| hsa-miR-1252-5p | -0.01 | -0.01 N/A |
| hsa-miR-1252-5p | -0.01 | -0.04 N/A |
| hsa-miR-1252-5p | -0.01 | -0.03 N/A |
| hsa-miR-1252-5p | -0.01 | -0.09 N/A |
| hsa-miR-1252-5p | -0.01 | -0.02 N/A |
| hsa-miR-1252-5p | -0.01 | -0.05 N/A |
| hsa-miR-1252-5p | -0.01 | -0.03 N/A |
| hsa-miR-1252-5p | -0.01 | -0.15 N/A |
| hsa-miR-1252-5p | -0.01 | -0.16 N/A |
| hsa-miR-1252-5p | -0.01 | -0.02 N/A |
| hsa-miR-1252-5p | -0.01 | -0.18 N/A |
| hsa-miR-1252-5p | -0.01 | -0.24 N/A |
| hsa-miR-1252-5p | -0.01 | -0.26 N/A |
| hsa-miR-1252-5p | -0.01 | -0.36 N/A |
| hsa-miR-1252-5p | -0.01 | -0.02 N/A |
| hsa-miR-1252-5p | -0.01 | -0.12 N/A |
| hsa-miR-1252-5p | -0.01 | -0.01 N/A |
| hsa-miR-1252-5p | -0.01 | -0.09 N/A |
| hsa-miR-1252-5p | -0.01 | -0.05 N/A |
| hsa-miR-1252-5p | -0.01 | -0.2 N/A  |
| hsa-miR-1252-5p | -0.01 | -0.04 N/A |
| hsa-miR-1252-5p | -0.01 | -0.02 N/A |
| hsa-miR-1252-5p | -0.01 | -0.27 N/A |
| hsa-miR-1252-5p | -0.01 | -0.3 N/A  |
| hsa-miR-1252-5p | -0.01 | -0.08 N/A |
| hsa-miR-1252-5p | -0.01 | -0.02 N/A |
| hsa-miR-1252-5p | -0.01 | -0.13 N/A |
| hsa-miR-1252-5p | -0.01 | -0.06 N/A |
| hsa-miR-1252-5p | -0.01 | -0.21 N/A |
| hsa-miR-1252-5p | -0.01 | -0.48 N/A |
| hsa-miR-1252-5p | -0.01 | -0.04 N/A |
| hsa-miR-1252-5p | -0.01 | -0.18 N/A |
| hsa-miR-1252-5p | -0.01 | -0.1 N/A  |
| hsa-miR-1252-5p | -0.01 | -0.06 N/A |
| hsa-miR-1252-5p | -0.01 | -0.07 N/A |
| hsa-miR-1252-5p | -0.01 | -0.08 N/A |
| hsa-miR-1252-5p | -0.01 | -0.04 N/A |

|                 |       |           |
|-----------------|-------|-----------|
| hsa-miR-1252-5p | -0.01 | -0.02 N/A |
| hsa-miR-1252-5p | -0.01 | -0.05 N/A |
| hsa-miR-1252-5p | -0.01 | -0.26 N/A |
| hsa-miR-1252-5p | -0.01 | -0.04 N/A |
| hsa-miR-1252-5p | -0.01 | -0.12 N/A |
| hsa-miR-1252-5p | -0.01 | -0.01 N/A |
| hsa-miR-1252-5p | -0.01 | -0.08 N/A |
| hsa-miR-1252-5p | -0.01 | -0.26 N/A |
| hsa-miR-1252-5p | -0.01 | -0.03 N/A |
| hsa-miR-1252-5p | -0.01 | -0.28 N/A |
| hsa-miR-1252-5p | -0.01 | -0.02 N/A |
| hsa-miR-1252-5p | -0.01 | -0.07 N/A |
| hsa-miR-1252-5p | -0.01 | -0.34 N/A |
| hsa-miR-1252-5p | -0.01 | -0.04 N/A |
| hsa-miR-1252-5p | -0.01 | -0.03 N/A |
| hsa-miR-1252-5p | -0.01 | -0.03 N/A |
| hsa-miR-1252-5p | -0.01 | -0.04 N/A |
| hsa-miR-1252-5p | -0.01 | -0.13 N/A |
| hsa-miR-1252-5p | -0.01 | -0.02 N/A |
| hsa-miR-1252-5p | -0.01 | -0.12 N/A |
| hsa-miR-1252-5p | -0.01 | -0.03 N/A |
| hsa-miR-1252-5p | -0.01 | -0.03 N/A |
| hsa-miR-1252-5p | -0.01 | -0.04 N/A |
| hsa-miR-1252-5p | -0.01 | -0.13 N/A |
| hsa-miR-1252-5p | -0.01 | -0.02 N/A |
| hsa-miR-1252-5p | -0.01 | -0.12 N/A |
| hsa-miR-1252-5p | -0.01 | -0.03 N/A |
| hsa-miR-1252-5p | -0.01 | -0.03 N/A |
| hsa-miR-1252-5p | -0.01 | -0.04 N/A |
| hsa-miR-1252-5p | -0.01 | -0.11 N/A |
| hsa-miR-1252-5p | -0.01 | -0.03 N/A |
| hsa-miR-1252-5p | -0.01 | -0.06 N/A |
| hsa-miR-1252-5p | -0.01 | -0.14 N/A |
| hsa-miR-1252-5p | -0.01 | -0.42 N/A |
| hsa-miR-1252-5p | -0.01 | -0.09 N/A |
| hsa-miR-1252-5p | -0.01 | -0.11 N/A |
| hsa-miR-1252-5p | -0.01 | -0.14 N/A |
| hsa-miR-1252-5p | -0.01 | -0.02 N/A |
| hsa-miR-1252-5p | -0.01 | -0.12 N/A |
| hsa-miR-1252-5p | -0.01 | -0.06 N/A |
| hsa-miR-1252-5p | -0.01 | -0.26 N/A |
| hsa-miR-1252-5p | -0.01 | -0.03 N/A |
| hsa-miR-1252-5p | -0.01 | -0.06 N/A |
| hsa-miR-1252-5p | -0.01 | -0.07 N/A |
| hsa-miR-1252-5p | -0.01 | -0.01 N/A |
| hsa-miR-1252-5p | -0.01 | -0.1 N/A  |
| hsa-miR-1252-5p | -0.01 | -0.1 N/A  |
| hsa-miR-1252-5p | -0.01 | -0.13 N/A |
| hsa-miR-1252-5p | -0.01 | -0.03 N/A |
| hsa-miR-1252-5p | -0.01 | -0.04 N/A |
| hsa-miR-1252-5p | -0.01 | -0.07 N/A |
| hsa-miR-1252-5p | -0.01 | -0.23 N/A |
| hsa-miR-1252-5p | -0.01 | -0.13 N/A |
| hsa-miR-1252-5p | -0.01 | -0.07 N/A |
| hsa-miR-1252-5p | -0.01 | -0.01 N/A |
| hsa-miR-1252-5p | -0.01 | -0.08 N/A |
| hsa-miR-1252-5p | -0.01 | -0.01 N/A |
| hsa-miR-1252-5p | -0.01 | -0.04 N/A |
| hsa-miR-1252-5p | -0.01 | -0.14 N/A |
| hsa-miR-1252-5p | -0.01 | -0.09 N/A |

|                 |       |           |
|-----------------|-------|-----------|
| hsa-miR-1252-5p | -0.01 | -0.07 N/A |
| hsa-miR-1252-5p | -0.01 | -0.27 N/A |
| hsa-miR-1252-5p | -0.01 | -0.2 N/A  |
| hsa-miR-1252-5p | -0.01 | -0.08 N/A |
| hsa-miR-1252-5p | -0.01 | -0.07 N/A |
| hsa-miR-1252-5p | -0.01 | -0.18 N/A |
| hsa-miR-1252-5p | -0.01 | -0.25 N/A |
| hsa-miR-1252-5p | -0.01 | -0.11 N/A |
| hsa-miR-1252-5p | -0.01 | -0.06 N/A |
| hsa-miR-1252-5p | -0.01 | -0.08 N/A |
| hsa-miR-1252-5p | -0.01 | -0.13 N/A |
| hsa-miR-1252-5p | -0.01 | -0.26 N/A |
| hsa-miR-1252-5p | -0.01 | -0.02 N/A |
| hsa-miR-1252-5p | -0.01 | -0.45 N/A |
| hsa-miR-1252-5p | -0.01 | -0.17 N/A |
| hsa-miR-1252-5p | -0.01 | -0.08 N/A |
| hsa-miR-1252-5p | -0.01 | -0.25 N/A |
| hsa-miR-1252-5p | -0.01 | -0.1 N/A  |
| hsa-miR-1252-5p | -0.01 | -0.02 N/A |
| hsa-miR-1252-5p | -0.01 | -0.06 N/A |
| hsa-miR-1252-5p | -0.01 | -0.06 N/A |
| hsa-miR-1252-5p | -0.01 | -0.25 N/A |
| hsa-miR-1252-5p | -0.01 | -0.34 N/A |
| hsa-miR-1252-5p | -0.01 | -0.11 N/A |
| hsa-miR-1252-5p | -0.01 | -0.11 N/A |
| hsa-miR-1252-5p | -0.01 | -0.28 N/A |
| hsa-miR-1252-5p | -0.01 | -0.04 N/A |
| hsa-miR-1252-5p | -0.01 | -0.09 N/A |
| hsa-miR-1252-5p | -0.01 | -0.2 N/A  |
| hsa-miR-1252-5p | -0.01 | -0.03 N/A |
| hsa-miR-1252-5p | -0.01 | -0.19 N/A |
| hsa-miR-1252-5p | -0.01 | -0.12 N/A |
| hsa-miR-1252-5p | -0.01 | -0.02 N/A |
| hsa-miR-1252-5p | -0.01 | -0.05 N/A |
| hsa-miR-1252-5p | -0.01 | -0.02 N/A |
| hsa-miR-1252-5p | -0.01 | -0.01 N/A |
| hsa-miR-1252-5p | -0.01 | -0.02 N/A |
| hsa-miR-1252-5p | -0.01 | -0.02 N/A |
| hsa-miR-1252-5p | -0.01 | -0.2 N/A  |
| hsa-miR-1252-5p | -0.01 | -0.02 N/A |
| hsa-miR-1252-5p | -0.01 | -0.15 N/A |
| hsa-miR-1252-5p | -0.01 | -0.03 N/A |
| hsa-miR-1252-5p | -0.01 | -0.02 N/A |
| hsa-miR-1252-5p | -0.01 | -0.02 N/A |
| hsa-miR-1252-5p | -0.01 | -0.09 N/A |
| hsa-miR-1252-5p | -0.01 | -0.03 N/A |
| hsa-miR-1252-5p | -0.01 | -0.03 N/A |
| hsa-miR-1252-5p | -0.01 | -0.08 N/A |
| hsa-miR-1252-5p | -0.01 | -0.12 N/A |
| hsa-miR-1252-5p | -0.01 | -0.01 N/A |
| hsa-miR-1252-5p | -0.01 | -0.12 N/A |
| hsa-miR-1252-5p | -0.01 | -0.08 N/A |
| hsa-miR-1252-5p | -0.01 | -0.01 N/A |
| hsa-miR-1252-5p | -0.01 | -0.22 N/A |

|                 |       |           |
|-----------------|-------|-----------|
| hsa-miR-1252-5p | -0.01 | -0.03 N/A |
| hsa-miR-1252-5p | -0.01 | -0.11 N/A |
| hsa-miR-1252-5p | -0.01 | -0.12 N/A |
| hsa-miR-1252-5p | -0.01 | -0.14 N/A |
| hsa-miR-1252-5p | -0.01 | -0.07 N/A |
| hsa-miR-1252-5p | -0.01 | -0.21 N/A |
| hsa-miR-1252-5p | -0.01 | -0.4 N/A  |
| hsa-miR-1252-5p | -0.01 | -0.12 N/A |
| hsa-miR-1252-5p | -0.01 | -0.22 N/A |
| hsa-miR-1252-5p | -0.01 | -0.15 N/A |
| hsa-miR-1252-5p | -0.01 | -0.02 N/A |
| hsa-miR-1252-5p | -0.01 | -0.02 N/A |
| hsa-miR-1252-5p | 0     | -0.12 N/A |
| hsa-miR-1252-5p | 0     | -0.03 N/A |
| hsa-miR-1252-5p | 0     | -0.09 N/A |
| hsa-miR-1252-5p | 0     | -0.23 N/A |
| hsa-miR-1252-5p | 0     | -0.1 N/A  |
| hsa-miR-1252-5p | 0     | -0.02 N/A |
| hsa-miR-1252-5p | 0     | -0.18 N/A |
| hsa-miR-1252-5p | 0     | -0.35 N/A |
| hsa-miR-1252-5p | 0     | -0.02 N/A |
| hsa-miR-1252-5p | 0     | -0.05 N/A |
| hsa-miR-1252-5p | 0     | -0.1 N/A  |
| hsa-miR-1252-5p | 0     | -0.2 N/A  |
| hsa-miR-1252-5p | 0     | -0.26 N/A |
| hsa-miR-1252-5p | 0     | -0.12 N/A |
| hsa-miR-1252-5p | 0     | -0.1 N/A  |
| hsa-miR-1252-5p | 0     | -0.02 N/A |
| hsa-miR-1252-5p | 0     | -0.14 N/A |
| hsa-miR-1252-5p | 0     | -0.2 N/A  |
| hsa-miR-1252-5p | 0     | -0.1 N/A  |
| hsa-miR-1252-5p | 0     | -0.03 N/A |
| hsa-miR-1252-5p | 0     | -0.08 N/A |
| hsa-miR-1252-5p | 0     | -0.03 N/A |
| hsa-miR-1252-5p | 0     | -0.06 N/A |
| hsa-miR-1252-5p | 0     | -0.17 N/A |
| hsa-miR-1252-5p | 0     | -0.21 N/A |
| hsa-miR-1252-5p | 0     | -0.17 N/A |
| hsa-miR-1252-5p | 0     | -0.1 N/A  |
| hsa-miR-1252-5p | 0     | -0.56 N/A |
| hsa-miR-1252-5p | 0     | -0.32 N/A |
| hsa-miR-1252-5p | 0     | -0.03 N/A |
| hsa-miR-1252-5p | 0     | -0.02 N/A |
| hsa-miR-1252-5p | 0     | -0.17 N/A |
| hsa-miR-1252-5p | 0     | -0.08 N/A |
| hsa-miR-1252-5p | 0     | -0.02 N/A |
| hsa-miR-1252-5p | 0     | -0.09 N/A |
| hsa-miR-1252-5p | 0     | -0.34 N/A |
| hsa-miR-1252-5p | 0     | -0.02 N/A |
| hsa-miR-1252-5p | 0     | -0.09 N/A |
| hsa-miR-1252-5p | 0     | -0.07 N/A |
| hsa-miR-1252-5p | 0     | -0.14 N/A |
| hsa-miR-1252-5p | 0     | -0.04 N/A |
| hsa-miR-1252-5p | 0     | -0.14 N/A |



|                 |   |           |
|-----------------|---|-----------|
| hsa-miR-1252-5p | 0 | -0.24 N/A |
| hsa-miR-1252-5p | 0 | -0.03 N/A |
| hsa-miR-1252-5p | 0 | -0.05 N/A |
| hsa-miR-1252-5p | 0 | -0.23 N/A |
| hsa-miR-1252-5p | 0 | -0.02 N/A |
| hsa-miR-1252-5p | 0 | -0.14 N/A |
| hsa-miR-1252-5p | 0 | -0.35 N/A |
| hsa-miR-1252-5p | 0 | -0.02 N/A |
| hsa-miR-1252-5p | 0 | -0.16 N/A |
| hsa-miR-1252-5p | 0 | -0.02 N/A |
| hsa-miR-1252-5p | 0 | -0.37 N/A |
| hsa-miR-1252-5p | 0 | -0.07 N/A |
| hsa-miR-1252-5p | 0 | -0.14 N/A |
| hsa-miR-1252-5p | 0 | -0.43 N/A |
| hsa-miR-1252-5p | 0 | -0.14 N/A |
| hsa-miR-1252-5p | 0 | -0.09 N/A |
| hsa-miR-1252-5p | 0 | -0.17 N/A |
| hsa-miR-1252-5p | 0 | -0.14 N/A |
| hsa-miR-1252-5p | 0 | -0.16 N/A |
| hsa-miR-1252-5p | 0 | -0.1 N/A  |
| hsa-miR-1252-5p | 0 | -0.28 N/A |
| hsa-miR-1252-5p | 0 | -0.02 N/A |
| hsa-miR-1252-5p | 0 | -0.1 N/A  |
| hsa-miR-1252-5p | 0 | -0.11 N/A |
| hsa-miR-1252-5p | 0 | -0.14 N/A |
| hsa-miR-1252-5p | 0 | -0.11 N/A |
| hsa-miR-1252-5p | 0 | -0.22 N/A |
| hsa-miR-1252-5p | 0 | -0.16 N/A |
| hsa-miR-1252-5p | 0 | -0.13 N/A |
| hsa-miR-1252-5p | 0 | -0.17 N/A |
| hsa-miR-1252-5p | 0 | -0.39 N/A |
| hsa-miR-1252-5p | 0 | -0.22 N/A |
| hsa-miR-1252-5p | 0 | -0.08 N/A |
| hsa-miR-1252-5p | 0 | -0.19 N/A |
| hsa-miR-1252-5p | 0 | -0.12 N/A |
| hsa-miR-1252-5p | 0 | -0.2 N/A  |
| hsa-miR-1252-5p | 0 | -0.02 N/A |
| hsa-miR-1252-5p | 0 | -0.24 N/A |
| hsa-miR-1252-5p | 0 | -0.08 N/A |
| hsa-miR-1252-5p | 0 | -0.02 N/A |
| hsa-miR-1252-5p | 0 | -0.19 N/A |
| hsa-miR-1252-5p | 0 | -0.08 N/A |
| hsa-miR-1252-5p | 0 | -0.07 N/A |
| hsa-miR-1252-5p | 0 | -0.06 N/A |
| hsa-miR-1252-5p | 0 | -0.07 N/A |
| hsa-miR-1252-5p | 0 | -0.04 N/A |
| hsa-miR-1252-5p | 0 | -0.06 N/A |
| hsa-miR-1252-5p | 0 | -0.04 N/A |
| hsa-miR-1252-5p | 0 | -0.17 N/A |
| hsa-miR-1252-5p | 0 | -0.05 N/A |
| hsa-miR-1252-5p | 0 | -0.02 N/A |
| hsa-miR-1252-5p | 0 | -0.17 N/A |
| hsa-miR-1252-5p | 0 | -0.02 N/A |
| hsa-miR-1252-5p | 0 | -0.12 N/A |

|                 |   |           |
|-----------------|---|-----------|
| hsa-miR-1252-5p | 0 | -0.12 N/A |
| hsa-miR-1252-5p | 0 | -0.02 N/A |
| hsa-miR-1252-5p | 0 | -0.15 N/A |
| hsa-miR-1252-5p | 0 | -0.1 N/A  |
| hsa-miR-1252-5p | 0 | -0.02 N/A |
| hsa-miR-1252-5p | 0 | -0.01 N/A |
| hsa-miR-1252-5p | 0 | -0.16 N/A |
| hsa-miR-1252-5p | 0 | -0.02 N/A |
| hsa-miR-1252-5p | 0 | -0.42 N/A |
| hsa-miR-1252-5p | 0 | -0.02 N/A |
| hsa-miR-1252-5p | 0 | -0.13 N/A |
| hsa-miR-1252-5p | 0 | -0.02 N/A |
| hsa-miR-1252-5p | 0 | -0.23 N/A |
| hsa-miR-1252-5p | 0 | -0.26 N/A |
| hsa-miR-1252-5p | 0 | -0.28 N/A |
| hsa-miR-1252-5p | 0 | -0.01 N/A |
| hsa-miR-1252-5p | 0 | -0.1 N/A  |
| hsa-miR-1252-5p | 0 | -0.04 N/A |
| hsa-miR-1252-5p | 0 | -1 N/A    |
| hsa-miR-1252-5p | 0 | -0.17 N/A |
| hsa-miR-1252-5p | 0 | -0.05 N/A |
| hsa-miR-1252-5p | 0 | -0.29 N/A |
| hsa-miR-1252-5p | 0 | -0.02 N/A |
| hsa-miR-1252-5p | 0 | -0.18 N/A |
| hsa-miR-1252-5p | 0 | -0.13 N/A |
| hsa-miR-1252-5p | 0 | -0.17 N/A |
| hsa-miR-1252-5p | 0 | -0.16 N/A |
| hsa-miR-1252-5p | 0 | -0.07 N/A |
| hsa-miR-1252-5p | 0 | -0.22 N/A |
| hsa-miR-1252-5p | 0 | -0.01 N/A |
| hsa-miR-1252-5p | 0 | -0.15 N/A |
| hsa-miR-1252-5p | 0 | -0.24 N/A |
| hsa-miR-1252-5p | 0 | -0.25 N/A |
| hsa-miR-1252-5p | 0 | -0.02 N/A |
| hsa-miR-1252-5p | 0 | -0.09 N/A |
| hsa-miR-1252-5p | 0 | -0.02 N/A |
| hsa-miR-1252-5p | 0 | -0.14 N/A |
| hsa-miR-1252-5p | 0 | -0.04 N/A |
| hsa-miR-1252-5p | 0 | -0.1 N/A  |
| hsa-miR-1252-5p | 0 | -0.22 N/A |
| hsa-miR-1252-5p | 0 | -0.04 N/A |
| hsa-miR-1252-5p | 0 | -0.18 N/A |
| hsa-miR-1252-5p | 0 | -0.08 N/A |
| hsa-miR-1252-5p | 0 | -0.2 N/A  |
| hsa-miR-1252-5p | 0 | -0.09 N/A |
| hsa-miR-1252-5p | 0 | -0.16 N/A |
| hsa-miR-1252-5p | 0 | -0.09 N/A |
| hsa-miR-1252-5p | 0 | -0.53 N/A |
| hsa-miR-1252-5p | 0 | -0.51 N/A |
| hsa-miR-1252-5p | 0 | -0.17 N/A |
| hsa-miR-1252-5p | 0 | -0.01 N/A |
| hsa-miR-1252-5p | 0 | -2.99 N/A |
| hsa-miR-1252-5p | 0 | -0.06 N/A |
| hsa-miR-1252-5p | 0 | -0.02 N/A |

|                 |   |           |
|-----------------|---|-----------|
| hsa-miR-1252-5p | 0 | -0.02 N/A |
| hsa-miR-1252-5p | 0 | -0.04 N/A |
| hsa-miR-1252-5p | 0 | -0.02 N/A |
| hsa-miR-1252-5p | 0 | -0.01 N/A |
| hsa-miR-1252-5p | 0 | -0.04 N/A |
| hsa-miR-1252-5p | 0 | -0.08 N/A |
| hsa-miR-1252-5p | 0 | -0.02 N/A |
| hsa-miR-1252-5p | 0 | -0.12 N/A |
| hsa-miR-1252-5p | 0 | -0.03 N/A |
| hsa-miR-1252-5p | 0 | -0.02 N/A |
| hsa-miR-1252-5p | 0 | -0.07 N/A |
| hsa-miR-1252-5p | 0 | -0.02 N/A |
| hsa-miR-1252-5p | 0 | -0.04 N/A |
| hsa-miR-1252-5p | 0 | -0.02 N/A |
| hsa-miR-1252-5p | 0 | -0.02 N/A |
| hsa-miR-1252-5p | 0 | -0.02 N/A |
| hsa-miR-1252-5p | 0 | -0.15 N/A |
| hsa-miR-1252-5p | 0 | -0.09 N/A |
| hsa-miR-1252-5p | 0 | -0.13 N/A |
| hsa-miR-1252-5p | 0 | -0.02 N/A |
| hsa-miR-1252-5p | 0 | -0.15 N/A |
| hsa-miR-1252-5p | 0 | -0.02 N/A |
| hsa-miR-1252-5p | 0 | -0.09 N/A |
| hsa-miR-1252-5p | 0 | -0.02 N/A |
| hsa-miR-1252-5p | 0 | -0.02 N/A |
| hsa-miR-1252-5p | 0 | -0.47 N/A |
| hsa-miR-1252-5p | 0 | -0.23 N/A |
| hsa-miR-1252-5p | 0 | -0.2 N/A  |
| hsa-miR-1252-5p | 0 | -0.16 N/A |
| hsa-miR-1252-5p | 0 | -0.02 N/A |
| hsa-miR-1252-5p | 0 | -0.03 N/A |
| hsa-miR-1252-5p | 0 | -0.16 N/A |
| hsa-miR-1252-5p | 0 | -0.14 N/A |
| hsa-miR-1252-5p | 0 | -0.05 N/A |
| hsa-miR-1252-5p | 0 | -0.02 N/A |
| hsa-miR-1252-5p | 0 | -0.14 N/A |
| hsa-miR-1252-5p | 0 | -0.1 N/A  |
| hsa-miR-1252-5p | 0 | -0.15 N/A |
| hsa-miR-1252-5p | 0 | -0.07 N/A |
| hsa-miR-1252-5p | 0 | -0.02 N/A |
| hsa-miR-1252-5p | 0 | -0.12 N/A |
| hsa-miR-1252-5p | 0 | -0.27 N/A |
| hsa-miR-1252-5p | 0 | -0.12 N/A |
| hsa-miR-1252-5p | 0 | -0.02 N/A |
| hsa-miR-1252-5p | 0 | -0.08 N/A |
| hsa-miR-1252-5p | 0 | -0.04 N/A |
| hsa-miR-1252-5p | 0 | -0.08 N/A |
| hsa-miR-1252-5p | 0 | -0.14 N/A |
| hsa-miR-1252-5p | 0 | -0.26 N/A |
| hsa-miR-1252-5p | 0 | -0.01 N/A |
| hsa-miR-1252-5p | 0 | -0.04 N/A |
| hsa-miR-1252-5p | 0 | -0.04 N/A |
| hsa-miR-1252-5p | 0 | -0.02 N/A |
| hsa-miR-1252-5p | 0 | -0.06 N/A |

|                 |   |           |
|-----------------|---|-----------|
| hsa-miR-1252-5p | 0 | -0.14 N/A |
| hsa-miR-1252-5p | 0 | -0.18 N/A |
| hsa-miR-1252-5p | 0 | -0.19 N/A |
| hsa-miR-1252-5p | 0 | -0.14 N/A |
| hsa-miR-1252-5p | 0 | -0.01 N/A |
| hsa-miR-1252-5p | 0 | -0.05 N/A |
| hsa-miR-1252-5p | 0 | -0.06 N/A |
| hsa-miR-1252-5p | 0 | -0.3 N/A  |
| hsa-miR-1252-5p | 0 | -0.02 N/A |
| hsa-miR-1252-5p | 0 | -0.15 N/A |
| hsa-miR-1252-5p | 0 | -0.02 N/A |
| hsa-miR-1252-5p | 0 | -0.14 N/A |
| hsa-miR-1252-5p | 0 | -0.09 N/A |
| hsa-miR-1252-5p | 0 | -0.17 N/A |
| hsa-miR-1252-5p | 0 | -0.1 N/A  |
| hsa-miR-1252-5p | 0 | -0.15 N/A |
| hsa-miR-1252-5p | 0 | -0.02 N/A |
| hsa-miR-1252-5p | 0 | -0.07 N/A |
| hsa-miR-1252-5p | 0 | -0.17 N/A |
| hsa-miR-1252-5p | 0 | -0.12 N/A |
| hsa-miR-1252-5p | 0 | -0.1 N/A  |
| hsa-miR-1252-5p | 0 | -0.2 N/A  |
| hsa-miR-1252-5p | 0 | -1.13 N/A |
| hsa-miR-1252-5p | 0 | -0.02 N/A |
| hsa-miR-1252-5p | 0 | -0.23 N/A |
| hsa-miR-1252-5p | 0 | -0.02 N/A |
| hsa-miR-1252-5p | 0 | -0.16 N/A |
| hsa-miR-1252-5p | 0 | -0.04 N/A |
| hsa-miR-1252-5p | 0 | -0.01 N/A |
| hsa-miR-1252-5p | 0 | -0.03 N/A |
| hsa-miR-1252-5p | 0 | -0.04 N/A |
| hsa-miR-1252-5p | 0 | -0.06 N/A |
| hsa-miR-1252-5p | 0 | -0.18 N/A |
| hsa-miR-1252-5p | 0 | -0.03 N/A |
| hsa-miR-1252-5p | 0 | -0.05 N/A |
| hsa-miR-1252-5p | 0 | -0.7 N/A  |
| hsa-miR-1252-5p | 0 | -0.14 N/A |
| hsa-miR-1252-5p | 0 | -0.44 N/A |
| hsa-miR-1252-5p | 0 | -0.13 N/A |
| hsa-miR-1252-5p | 0 | -0.17 N/A |
| hsa-miR-1252-5p | 0 | -0.06 N/A |
| hsa-miR-1252-5p | 0 | -0.22 N/A |
| hsa-miR-1252-5p | 0 | -0.04 N/A |
| hsa-miR-1252-5p | 0 | -0.02 N/A |
| hsa-miR-1252-5p | 0 | -0.04 N/A |
| hsa-miR-1252-5p | 0 | -0.14 N/A |
| hsa-miR-1252-5p | 0 | -0.14 N/A |
| hsa-miR-1252-5p | 0 | -0.38 N/A |
| hsa-miR-1252-5p | 0 | -0.24 N/A |
| hsa-miR-1252-5p | 0 | -0.06 N/A |
| hsa-miR-1252-5p | 0 | -0.14 N/A |
| hsa-miR-1252-5p | 0 | -0.08 N/A |
| hsa-miR-1252-5p | 0 | -0.09 N/A |
| hsa-miR-1252-5p | 0 | -0.28 N/A |

|                 |   |           |
|-----------------|---|-----------|
| hsa-miR-1252-5p | 0 | -0.07 N/A |
| hsa-miR-1252-5p | 0 | -0.12 N/A |
| hsa-miR-1252-5p | 0 | -0.29 N/A |
| hsa-miR-1252-5p | 0 | -0.21 N/A |
| hsa-miR-1252-5p | 0 | -0.12 N/A |
| hsa-miR-1252-5p | 0 | -0.03 N/A |
| hsa-miR-1252-5p | 0 | -0.1 N/A  |
| hsa-miR-1252-5p | 0 | -0.18 N/A |
| hsa-miR-1252-5p | 0 | -0.03 N/A |
| hsa-miR-1252-5p | 0 | -0.02 N/A |
| hsa-miR-1252-5p | 0 | -0.2 N/A  |
| hsa-miR-1252-5p | 0 | -0.25 N/A |
| hsa-miR-1252-5p | 0 | -0.02 N/A |
| hsa-miR-1252-5p | 0 | -0.05 N/A |
| hsa-miR-1252-5p | 0 | -0.22 N/A |
| hsa-miR-1252-5p | 0 | -0.08 N/A |
| hsa-miR-1252-5p | 0 | -0.04 N/A |
| hsa-miR-1252-5p | 0 | -0.21 N/A |
| hsa-miR-1252-5p | 0 | -0.02 N/A |
| hsa-miR-1252-5p | 0 | -0.02 N/A |
| hsa-miR-1252-5p | 0 | -0.1 N/A  |
| hsa-miR-1252-5p | 0 | -0.01 N/A |
| hsa-miR-1252-5p | 0 | -0.12 N/A |
| hsa-miR-1252-5p | 0 | -0.03 N/A |
| hsa-miR-1252-5p | 0 | -0.72 N/A |
| hsa-miR-1252-5p | 0 | -0.66 N/A |
| hsa-miR-1252-5p | 0 | -0.05 N/A |
| hsa-miR-1252-5p | 0 | -0.02 N/A |
| hsa-miR-1252-5p | 0 | -0.15 N/A |
| hsa-miR-1252-5p | 0 | -0.01 N/A |
| hsa-miR-1252-5p | 0 | -0.32 N/A |
| hsa-miR-1252-5p | 0 | -0.04 N/A |
| hsa-miR-1252-5p | 0 | -0.04 N/A |
| hsa-miR-1252-5p | 0 | -0.09 N/A |
| hsa-miR-1252-5p | 0 | -0.02 N/A |
| hsa-miR-1252-5p | 0 | -0.02 N/A |
| hsa-miR-1252-5p | 0 | -0.04 N/A |
| hsa-miR-1252-5p | 0 | -0.11 N/A |
| hsa-miR-1252-5p | 0 | -0.19 N/A |
| hsa-miR-1252-5p | 0 | -0.02 N/A |
| hsa-miR-1252-5p | 0 | -0.14 N/A |
| hsa-miR-1252-5p | 0 | -0.09 N/A |
| hsa-miR-1252-5p | 0 | -0.06 N/A |
| hsa-miR-1252-5p | 0 | -0.01 N/A |
| hsa-miR-1252-5p | 0 | -0.11 N/A |
| hsa-miR-1252-5p | 0 | -0.14 N/A |
| hsa-miR-1252-5p | 0 | -0.05 N/A |
| hsa-miR-1252-5p | 0 | -0.05 N/A |
| hsa-miR-1252-5p | 0 | -0.02 N/A |
| hsa-miR-1252-5p | 0 | -0.36 N/A |
| hsa-miR-1252-5p | 0 | -0.08 N/A |
| hsa-miR-1252-5p | 0 | -0.08 N/A |
| hsa-miR-1252-5p | 0 | -0.22 N/A |
| hsa-miR-1252-5p | 0 | -0.1 N/A  |

|                 |   |           |
|-----------------|---|-----------|
| hsa-miR-1252-5p | 0 | -0.02 N/A |
| hsa-miR-1252-5p | 0 | -0.36 N/A |
| hsa-miR-1252-5p | 0 | -0.03 N/A |
| hsa-miR-1252-5p | 0 | -0.03 N/A |
| hsa-miR-1252-5p | 0 | -0.04 N/A |
| hsa-miR-1252-5p | 0 | -0.17 N/A |
| hsa-miR-1252-5p | 0 | -0.26 N/A |
| hsa-miR-1252-5p | 0 | -0.3 N/A  |
| hsa-miR-1252-5p | 0 | -0.17 N/A |
| hsa-miR-1252-5p | 0 | -0.08 N/A |
| hsa-miR-1252-5p | 0 | -0.11 N/A |
| hsa-miR-1252-5p | 0 | -0.01 N/A |
| hsa-miR-1252-5p | 0 | -0.06 N/A |
| hsa-miR-1252-5p | 0 | -0.1 N/A  |
| hsa-miR-1252-5p | 0 | -0.14 N/A |
| hsa-miR-1252-5p | 0 | -0.02 N/A |
| hsa-miR-1252-5p | 0 | -0.02 N/A |
| hsa-miR-1252-5p | 0 | -0.47 N/A |
| hsa-miR-1252-5p | 0 | -0.02 N/A |
| hsa-miR-1252-5p | 0 | -0.02 N/A |
| hsa-miR-1252-5p | 0 | -0.11 N/A |
| hsa-miR-1252-5p | 0 | -0.03 N/A |
| hsa-miR-1252-5p | 0 | -0.01 N/A |
| hsa-miR-1252-5p | 0 | -0.02 N/A |
| hsa-miR-1252-5p | 0 | -0.28 N/A |
| hsa-miR-1252-5p | 0 | -0.06 N/A |
| hsa-miR-1252-5p | 0 | -0.19 N/A |
| hsa-miR-1252-5p | 0 | -0.09 N/A |
| hsa-miR-1252-5p | 0 | -0.43 N/A |
| hsa-miR-1252-5p | 0 | -0.03 N/A |
| hsa-miR-1252-5p | 0 | -0.23 N/A |
| hsa-miR-1252-5p | 0 | -0.04 N/A |
| hsa-miR-1252-5p | 0 | -0.09 N/A |
| hsa-miR-1252-5p | 0 | -0.12 N/A |
| hsa-miR-1252-5p | 0 | -0.11 N/A |
| hsa-miR-1252-5p | 0 | -0.43 N/A |
| hsa-miR-1252-5p | 0 | -0.02 N/A |
| hsa-miR-1252-5p | 0 | -0.02 N/A |
| hsa-miR-1252-5p | 0 | -0.02 N/A |
| hsa-miR-1252-5p | 0 | -0.07 N/A |
| hsa-miR-1252-5p | 0 | -0.02 N/A |
| hsa-miR-1252-5p | 0 | -0.36 N/A |
| hsa-miR-1252-5p | 0 | -0.06 N/A |
| hsa-miR-1252-5p | 0 | -0.21 N/A |
| hsa-miR-1252-5p | 0 | -0.34 N/A |
| hsa-miR-1252-5p | 0 | -0.06 N/A |
| hsa-miR-1252-5p | 0 | -0.02 N/A |
| hsa-miR-1252-5p | 0 | -0.04 N/A |
| hsa-miR-1252-5p | 0 | -0.07 N/A |
| hsa-miR-1252-5p | 0 | -0.11 N/A |
| hsa-miR-1252-5p | 0 | -0.02 N/A |
| hsa-miR-1252-5p | 0 | -0.17 N/A |
| hsa-miR-1252-5p | 0 | -0.02 N/A |
| hsa-miR-1252-5p | 0 | -0.08 N/A |

|                 |   |           |
|-----------------|---|-----------|
| hsa-miR-1252-5p | 0 | -0.01 N/A |
| hsa-miR-1252-5p | 0 | -0.1 N/A  |
| hsa-miR-1252-5p | 0 | -0.02 N/A |
| hsa-miR-1252-5p | 0 | -0.08 N/A |
| hsa-miR-1252-5p | 0 | -0.06 N/A |
| hsa-miR-1252-5p | 0 | -0.04 N/A |
| hsa-miR-1252-5p | 0 | -0.31 N/A |
| hsa-miR-1252-5p | 0 | -0.3 N/A  |
| hsa-miR-1252-5p | 0 | -0.25 N/A |
| hsa-miR-1252-5p | 0 | -0.28 N/A |
| hsa-miR-1252-5p | 0 | -0.29 N/A |
| hsa-miR-1252-5p | 0 | -0.08 N/A |
| hsa-miR-1252-5p | 0 | -0.29 N/A |
| hsa-miR-1252-5p | 0 | -0.28 N/A |
| hsa-miR-1252-5p | 0 | -0.27 N/A |
| hsa-miR-1252-5p | 0 | -0.07 N/A |
| hsa-miR-1252-5p | 0 | -0.41 N/A |
| hsa-miR-1252-5p | 0 | -0.03 N/A |
| hsa-miR-1252-5p | 0 | -0.05 N/A |
| hsa-miR-1252-5p | 0 | -0.26 N/A |
| hsa-miR-1252-5p | 0 | -0.3 N/A  |
| hsa-miR-1252-5p | 0 | -0.19 N/A |
| hsa-miR-1252-5p | 0 | -0.26 N/A |
| hsa-miR-1252-5p | 0 | -0.14 N/A |
| hsa-miR-1252-5p | 0 | -0.09 N/A |
| hsa-miR-1252-5p | 0 | -0.13 N/A |
| hsa-miR-1252-5p | 0 | -0.02 N/A |
| hsa-miR-1252-5p | 0 | -0.23 N/A |
| hsa-miR-1252-5p | 0 | -0.24 N/A |
| hsa-miR-1252-5p | 0 | -0.06 N/A |
| hsa-miR-1252-5p | 0 | -0.18 N/A |
| hsa-miR-1252-5p | 0 | -0.13 N/A |
| hsa-miR-1252-5p | 0 | -0.15 N/A |
| hsa-miR-1252-5p | 0 | -0.2 N/A  |
| hsa-miR-1252-5p | 0 | -0.21 N/A |
| hsa-miR-1252-5p | 0 | -0.21 N/A |
| hsa-miR-1252-5p | 0 | -0.22 N/A |
| hsa-miR-1252-5p | 0 | -0.02 N/A |
| hsa-miR-1252-5p | 0 | -0.22 N/A |
| hsa-miR-1252-5p | 0 | -0.19 N/A |
| hsa-miR-1252-5p | 0 | -0.22 N/A |
| hsa-miR-1252-5p | 0 | -0.21 N/A |
| hsa-miR-1252-5p | 0 | -0.12 N/A |
| hsa-miR-1252-5p | 0 | -0.01 N/A |
| hsa-miR-1252-5p | 0 | -0.05 N/A |
| hsa-miR-1252-5p | 0 | -0.19 N/A |
| hsa-miR-1252-5p | 0 | -0.04 N/A |
| hsa-miR-1252-5p | 0 | -0.08 N/A |
| hsa-miR-1252-5p | 0 | -0.03 N/A |
| hsa-miR-1252-5p | 0 | -0.22 N/A |
| hsa-miR-1252-5p | 0 | -0.02 N/A |
| hsa-miR-1252-5p | 0 | -0.3 N/A  |
| hsa-miR-1252-5p | 0 | -0.24 N/A |
| hsa-miR-1252-5p | 0 | -0.17 N/A |

|                 |   |           |
|-----------------|---|-----------|
| hsa-miR-1252-5p | 0 | -0.15 N/A |
| hsa-miR-1252-5p | 0 | -0.02 N/A |
| hsa-miR-1252-5p | 0 | -0.14 N/A |
| hsa-miR-1252-5p | 0 | -0.16 N/A |
| hsa-miR-1252-5p | 0 | -0.16 N/A |
| hsa-miR-1252-5p | 0 | -0.17 N/A |
| hsa-miR-1252-5p | 0 | -0.15 N/A |
| hsa-miR-1252-5p | 0 | -0.17 N/A |
| hsa-miR-1252-5p | 0 | -0.12 N/A |
| hsa-miR-1252-5p | 0 | -0.02 N/A |
| hsa-miR-1252-5p | 0 | -0.03 N/A |
| hsa-miR-1252-5p | 0 | -0.14 N/A |
| hsa-miR-1252-5p | 0 | -0.04 N/A |
| hsa-miR-1252-5p | 0 | -0.15 N/A |
| hsa-miR-1252-5p | 0 | -0.13 N/A |
| hsa-miR-1252-5p | 0 | -0.18 N/A |
| hsa-miR-1252-5p | 0 | -0.01 N/A |
| hsa-miR-1252-5p | 0 | -0.14 N/A |
| hsa-miR-1252-5p | 0 | -0.16 N/A |
| hsa-miR-1252-5p | 0 | -0.16 N/A |
| hsa-miR-1252-5p | 0 | -0.15 N/A |
| hsa-miR-1252-5p | 0 | -0.18 N/A |
| hsa-miR-1252-5p | 0 | -0.01 N/A |
| hsa-miR-1252-5p | 0 | -0.02 N/A |
| hsa-miR-1252-5p | 0 | -0.15 N/A |
| hsa-miR-1252-5p | 0 | -0.18 N/A |
| hsa-miR-1252-5p | 0 | -0.25 N/A |
| hsa-miR-1252-5p | 0 | -0.17 N/A |
| hsa-miR-1252-5p | 0 | -0.23 N/A |
| hsa-miR-1252-5p | 0 | -0.14 N/A |
| hsa-miR-1252-5p | 0 | -0.17 N/A |
| hsa-miR-1252-5p | 0 | -0.03 N/A |
| hsa-miR-1252-5p | 0 | -0.14 N/A |
| hsa-miR-1252-5p | 0 | -0.14 N/A |
| hsa-miR-1252-5p | 0 | -0.14 N/A |
| hsa-miR-1252-5p | 0 | -0.06 N/A |
| hsa-miR-1252-5p | 0 | -0.02 N/A |
| hsa-miR-1252-5p | 0 | -0.04 N/A |
| hsa-miR-1252-5p | 0 | -0.19 N/A |
| hsa-miR-1252-5p | 0 | -0.07 N/A |
| hsa-miR-1252-5p | 0 | -0.12 N/A |
| hsa-miR-1252-5p | 0 | -0.14 N/A |
| hsa-miR-1252-5p | 0 | -0.01 N/A |
| hsa-miR-1252-5p | 0 | -0.27 N/A |
| hsa-miR-1252-5p | 0 | -0.1 N/A  |
| hsa-miR-1252-5p | 0 | -0.08 N/A |
| hsa-miR-1252-5p | 0 | -0.02 N/A |
| hsa-miR-1252-5p | 0 | -0.23 N/A |
| hsa-miR-1252-5p | 0 | -0.11 N/A |
| hsa-miR-1252-5p | 0 | -0.03 N/A |
| hsa-miR-1252-5p | 0 | -0.12 N/A |
| hsa-miR-1252-5p | 0 | -0.1 N/A  |
| hsa-miR-1252-5p | 0 | -0.02 N/A |
| hsa-miR-1252-5p | 0 | -0.01 N/A |



|                 |   |           |
|-----------------|---|-----------|
| hsa-miR-1252-5p | 0 | -0.06 N/A |
| hsa-miR-1252-5p | 0 | -0.1 N/A  |
| hsa-miR-1252-5p | 0 | -0.01 N/A |
| hsa-miR-1252-5p | 0 | -0.03 N/A |
| hsa-miR-1252-5p | 0 | -0.09 N/A |
| hsa-miR-1252-5p | 0 | -0.12 N/A |
| hsa-miR-1252-5p | 0 | -0.11 N/A |
| hsa-miR-1252-5p | 0 | -0.02 N/A |
| hsa-miR-1252-5p | 0 | -0.11 N/A |
| hsa-miR-1252-5p | 0 | -0.2 N/A  |
| hsa-miR-1252-5p | 0 | -0.04 N/A |
| hsa-miR-1252-5p | 0 | -0.15 N/A |
| hsa-miR-1252-5p | 0 | -0.1 N/A  |
| hsa-miR-1252-5p | 0 | -0.12 N/A |
| hsa-miR-1252-5p | 0 | -0.02 N/A |
| hsa-miR-1252-5p | 0 | -0.12 N/A |
| hsa-miR-1252-5p | 0 | -0.11 N/A |
| hsa-miR-1252-5p | 0 | -0.02 N/A |
| hsa-miR-1252-5p | 0 | -0.12 N/A |
| hsa-miR-1252-5p | 0 | -0.11 N/A |
| hsa-miR-1252-5p | 0 | -0.07 N/A |
| hsa-miR-1252-5p | 0 | -0.1 N/A  |
| hsa-miR-1252-5p | 0 | -0.24 N/A |
| hsa-miR-1252-5p | 0 | -0.02 N/A |
| hsa-miR-1252-5p | 0 | -0.1 N/A  |
| hsa-miR-1252-5p | 0 | -0.11 N/A |
| hsa-miR-1252-5p | 0 | -0.1 N/A  |
| hsa-miR-1252-5p | 0 | -0.2 N/A  |
| hsa-miR-1252-5p | 0 | -0.07 N/A |
| hsa-miR-1252-5p | 0 | -0.15 N/A |
| hsa-miR-1252-5p | 0 | -0.03 N/A |
| hsa-miR-1252-5p | 0 | -0.29 N/A |
| hsa-miR-1252-5p | 0 | -0.07 N/A |
| hsa-miR-1252-5p | 0 | -0.02 N/A |
| hsa-miR-1252-5p | 0 | -0.15 N/A |
| hsa-miR-1252-5p | 0 | -0.06 N/A |
| hsa-miR-1252-5p | 0 | -0.16 N/A |
| hsa-miR-1252-5p | 0 | -0.05 N/A |
| hsa-miR-1252-5p | 0 | -0.05 N/A |
| hsa-miR-1252-5p | 0 | -0.03 N/A |
| hsa-miR-1252-5p | 0 | -0.13 N/A |
| hsa-miR-1252-5p | 0 | -0.04 N/A |
| hsa-miR-1252-5p | 0 | -0.38 N/A |
| hsa-miR-1252-5p | 0 | -0.02 N/A |
| hsa-miR-1252-5p | 0 | -0.07 N/A |
| hsa-miR-1252-5p | 0 | -0.04 N/A |
| hsa-miR-1252-5p | 0 | -0.03 N/A |
| hsa-miR-1252-5p | 0 | -0.18 N/A |
| hsa-miR-1252-5p | 0 | -0.04 N/A |
| hsa-miR-1252-5p | 0 | -0.01 N/A |
| hsa-miR-1252-5p | 0 | -0.02 N/A |
| hsa-miR-1252-5p | 0 | -0.05 N/A |
| hsa-miR-1252-5p | 0 | -0.09 N/A |
| hsa-miR-1252-5p | 0 | -0.02 N/A |

|                 |   |           |
|-----------------|---|-----------|
| hsa-miR-1252-5p | 0 | -0.05 N/A |
| hsa-miR-1252-5p | 0 | -0.03 N/A |
| hsa-miR-1252-5p | 0 | -0.05 N/A |
| hsa-miR-1252-5p | 0 | -0.1 N/A  |
| hsa-miR-1252-5p | 0 | -0.08 N/A |
| hsa-miR-1252-5p | 0 | -0.03 N/A |
| hsa-miR-1252-5p | 0 | -0.03 N/A |
| hsa-miR-1252-5p | 0 | -0.02 N/A |
| hsa-miR-1252-5p | 0 | -0.17 N/A |
| hsa-miR-1252-5p | 0 | -0.06 N/A |
| hsa-miR-1252-5p | 0 | -0.05 N/A |
| hsa-miR-1252-5p | 0 | -0.05 N/A |
| hsa-miR-1252-5p | 0 | -0.02 N/A |
| hsa-miR-1252-5p | 0 | -0.24 N/A |
| hsa-miR-1252-5p | 0 | -0.02 N/A |
| hsa-miR-1252-5p | 0 | -0.03 N/A |
| hsa-miR-1252-5p | 0 | -0.07 N/A |
| hsa-miR-1252-5p | 0 | -0.17 N/A |
| hsa-miR-1252-5p | 0 | -0.05 N/A |
| hsa-miR-1252-5p | 0 | -0.03 N/A |
| hsa-miR-1252-5p | 0 | -0.03 N/A |
| hsa-miR-1252-5p | 0 | -0.14 N/A |
| hsa-miR-1252-5p | 0 | -0.03 N/A |
| hsa-miR-1252-5p | 0 | -0.08 N/A |
| hsa-miR-1252-5p | 0 | -0.56 N/A |
| hsa-miR-1252-5p | 0 | -0.07 N/A |
| hsa-miR-1252-5p | 0 | -0.07 N/A |
| hsa-miR-1252-5p | 0 | -0.06 N/A |
| hsa-miR-1252-5p | 0 | -0.04 N/A |
| hsa-miR-1252-5p | 0 | -0.08 N/A |
| hsa-miR-1252-5p | 0 | -0.01 N/A |
| hsa-miR-1252-5p | 0 | -0.18 N/A |
| hsa-miR-1252-5p | 0 | -0.11 N/A |
| hsa-miR-1252-5p | 0 | -0.01 N/A |
| hsa-miR-1252-5p | 0 | -0.14 N/A |
| hsa-miR-1252-5p | 0 | -0.02 N/A |
| hsa-miR-1252-5p | 0 | -0.14 N/A |
| hsa-miR-1252-5p | 0 | -0.02 N/A |
| hsa-miR-1252-5p | 0 | -0.02 N/A |
| hsa-miR-1252-5p | 0 | -0.06 N/A |
| hsa-miR-1252-5p | 0 | -0.24 N/A |
| hsa-miR-1252-5p | 0 | -0.26 N/A |
| hsa-miR-1252-5p | 0 | -0.02 N/A |
| hsa-miR-1252-5p | 0 | -0.18 N/A |
| hsa-miR-1252-5p | 0 | -0.03 N/A |
| hsa-miR-1252-5p | 0 | -0.01 N/A |
| hsa-miR-1252-5p | 0 | -0.28 N/A |
| hsa-miR-1252-5p | 0 | -0.02 N/A |
| hsa-miR-1252-5p | 0 | -0.02 N/A |
| hsa-miR-1252-5p | 0 | -0.06 N/A |
| hsa-miR-1252-5p | 0 | -0.06 N/A |
| hsa-miR-1252-5p | 0 | -0.02 N/A |
| hsa-miR-1252-5p | 0 | -0.5 N/A  |
| hsa-miR-1252-5p | 0 | -0.18 N/A |

|                 |   |           |
|-----------------|---|-----------|
| hsa-miR-1252-5p | 0 | -0.02 N/A |
| hsa-miR-1252-5p | 0 | -0.21 N/A |
| hsa-miR-1252-5p | 0 | -0.03 N/A |
| hsa-miR-1252-5p | 0 | -0.1 N/A  |
| hsa-miR-1252-5p | 0 | -0.01 N/A |
| hsa-miR-1252-5p | 0 | -0.07 N/A |
| hsa-miR-1252-5p | 0 | -0.01 N/A |
| hsa-miR-1252-5p | 0 | -0.03 N/A |
| hsa-miR-1252-5p | 0 | -0.05 N/A |
| hsa-miR-1252-5p | 0 | -0.11 N/A |
| hsa-miR-1252-5p | 0 | -0.05 N/A |
| hsa-miR-1252-5p | 0 | -0.02 N/A |
| hsa-miR-1252-5p | 0 | -0.03 N/A |
| hsa-miR-1252-5p | 0 | -0.03 N/A |
| hsa-miR-1252-5p | 0 | -0.11 N/A |
| hsa-miR-1252-5p | 0 | -0.22 N/A |
| hsa-miR-1252-5p | 0 | -0.12 N/A |
| hsa-miR-1252-5p | 0 | -0.11 N/A |
| hsa-miR-1252-5p | 0 | -0.01 N/A |
| hsa-miR-1252-5p | 0 | -0.12 N/A |
| hsa-miR-1252-5p | 0 | -0.12 N/A |
| hsa-miR-1252-5p | 0 | -0.09 N/A |
| hsa-miR-1252-5p | 0 | -0.02 N/A |
| hsa-miR-1252-5p | 0 | -0.02 N/A |
| hsa-miR-1252-5p | 0 | -0.12 N/A |
| hsa-miR-1252-5p | 0 | -0.16 N/A |
| hsa-miR-1252-5p | 0 | -0.01 N/A |
| hsa-miR-1252-5p | 0 | -0.21 N/A |
| hsa-miR-1252-5p | 0 | -0.03 N/A |
| hsa-miR-1252-5p | 0 | -0.02 N/A |
| hsa-miR-1252-5p | 0 | -0.2 N/A  |
| hsa-miR-1252-5p | 0 | -0.11 N/A |
| hsa-miR-1252-5p | 0 | -0.02 N/A |
| hsa-miR-1252-5p | 0 | -0.02 N/A |
| hsa-miR-1252-5p | 0 | -0.03 N/A |
| hsa-miR-1252-5p | 0 | -0.13 N/A |
| hsa-miR-1252-5p | 0 | -0.07 N/A |
| hsa-miR-1252-5p | 0 | -0.18 N/A |
| hsa-miR-1252-5p | 0 | -0.02 N/A |
| hsa-miR-1252-5p | 0 | -0.02 N/A |
| hsa-miR-1252-5p | 0 | -0.02 N/A |
| hsa-miR-1252-5p | 0 | -0.08 N/A |
| hsa-miR-1252-5p | 0 | -0.15 N/A |
| hsa-miR-1252-5p | 0 | -0.16 N/A |
| hsa-miR-1252-5p | 0 | -0.04 N/A |
| hsa-miR-1252-5p | 0 | -0.19 N/A |
| hsa-miR-1252-5p | 0 | -0.03 N/A |
| hsa-miR-1252-5p | 0 | -0.07 N/A |
| hsa-miR-1252-5p | 0 | -0.11 N/A |
| hsa-miR-1252-5p | 0 | -0.12 N/A |
| hsa-miR-1252-5p | 0 | -0.02 N/A |
| hsa-miR-1252-5p | 0 | -0.03 N/A |
| hsa-miR-1252-5p | 0 | -0.05 N/A |
| hsa-miR-1252-5p | 0 | -0.11 N/A |

|                 |   |           |
|-----------------|---|-----------|
| hsa-miR-1252-5p | 0 | -0.24 N/A |
| hsa-miR-1252-5p | 0 | -0.14 N/A |
| hsa-miR-1252-5p | 0 | -0.33 N/A |
| hsa-miR-1252-5p | 0 | -0.2 N/A  |
| hsa-miR-1252-5p | 0 | -0.18 N/A |
| hsa-miR-1252-5p | 0 | -0.08 N/A |
| hsa-miR-1252-5p | 0 | -0.07 N/A |
| hsa-miR-1252-5p | 0 | -0.02 N/A |
| hsa-miR-1252-5p | 0 | -0.1 N/A  |
| hsa-miR-1252-5p | 0 | -0.13 N/A |
| hsa-miR-1252-5p | 0 | -0.03 N/A |
| hsa-miR-1252-5p | 0 | -0.02 N/A |
| hsa-miR-1252-5p | 0 | -0.02 N/A |
| hsa-miR-1252-5p | 0 | -0.05 N/A |
| hsa-miR-1252-5p | 0 | -0.01 N/A |
| hsa-miR-1252-5p | 0 | -0.06 N/A |
| hsa-miR-1252-5p | 0 | -0.02 N/A |
| hsa-miR-1252-5p | 0 | -0.03 N/A |
| hsa-miR-1252-5p | 0 | -0.01 N/A |
| hsa-miR-1252-5p | 0 | -0.02 N/A |
| hsa-miR-1252-5p | 0 | -0.02 N/A |
| hsa-miR-1252-5p | 0 | -0.11 N/A |
| hsa-miR-1252-5p | 0 | -0.05 N/A |
| hsa-miR-1252-5p | 0 | -0.02 N/A |
| hsa-miR-1252-5p | 0 | -0.04 N/A |
| hsa-miR-1252-5p | 0 | -0.47 N/A |
| hsa-miR-1252-5p | 0 | -0.36 N/A |
| hsa-miR-1252-5p | 0 | -0.18 N/A |
| hsa-miR-1252-5p | 0 | -0.05 N/A |
| hsa-miR-1252-5p | 0 | -0.02 N/A |
| hsa-miR-1252-5p | 0 | -0.08 N/A |
| hsa-miR-1252-5p | 0 | -0.12 N/A |
| hsa-miR-1252-5p | 0 | -0.09 N/A |
| hsa-miR-1252-5p | 0 | -0.03 N/A |
| hsa-miR-1252-5p | 0 | -0.12 N/A |
| hsa-miR-1252-5p | 0 | -0.02 N/A |
| hsa-miR-1252-5p | 0 | -0.07 N/A |
| hsa-miR-1252-5p | 0 | -0.23 N/A |
| hsa-miR-1252-5p | 0 | -0.06 N/A |
| hsa-miR-1252-5p | 0 | -0.21 N/A |
| hsa-miR-1252-5p | 0 | -0.13 N/A |
| hsa-miR-1252-5p | 0 | -0.03 N/A |
| hsa-miR-1252-5p | 0 | -0.08 N/A |
| hsa-miR-1252-5p | 0 | -0.23 N/A |
| hsa-miR-1252-5p | 0 | -0.05 N/A |
| hsa-miR-1252-5p | 0 | -0.32 N/A |
| hsa-miR-1252-5p | 0 | -0.01 N/A |
| hsa-miR-1252-5p | 0 | -0.15 N/A |
| hsa-miR-1252-5p | 0 | -0.02 N/A |
| hsa-miR-1252-5p | 0 | -0.03 N/A |
| hsa-miR-1252-5p | 0 | -0.02 N/A |
| hsa-miR-1252-5p | 0 | -0.1 N/A  |
| hsa-miR-1252-5p | 0 | -0.1 N/A  |
| hsa-miR-1252-5p | 0 | -0.07 N/A |
